# Supplementary material for: Intravesical BCG in bladder cancer induces innate immune responses against SARS-CoV-2
Source: Front Immunol. 2023 Jul 13;14:1202157. doi: 10.3389/fimmu.2023.1202157 (PMC10374029; doi:10.3389/fimmu.2023.1202157)
Supplement: Supplementary file 2 [file Table_1.xlsx]

## Sheet: >3FC(UP), Prom|Intron, logCPM>1
seqnames	start	end	width	logFC	logCPM	F	PValue	annotation	geneChr	geneStart	geneEnd	geneLength	geneStrand	geneId	transcriptId	distanceToTSS	ENSEMBL	SYMBOL	GENENAME
chr6	31351216	31352271	1056	10.8084	1.8035	10.054	0.00152078	Promoter (2-3kb)	6	31353872	31354806	935	2	3106	ENST00000481849.5	2535	ENSG00000234745	HLA-B	major histocompatibility complex, class I, B
chr6	32589232	32590152	921	10.5084	1.23708	11.1212	0.000853864	Promoter (<=1kb)	6	32578769	32589848	11080	2	3123	ENST00000360004.5	0	ENSG00000196126	HLA-DRB1	major histocompatibility complex, class II, DR beta 1
chr7	767689	768762	1074	7.24623	2.67687	6.46785	0.0109863	Promoter (<=1kb)	7	768475	786044	17570	1	54919	ENST00000403952.3	0	ENSG00000164818	DNAAF5	dynein axonemal assembly factor 5
chr6	31355954	31357404	1451	7.02098	3.05073	5.79379	0.0160852	Promoter (<=1kb)	6	31353875	31357179	3305	2	3106	ENST00000412585.7	0	ENSG00000234745	HLA-B	major histocompatibility complex, class I, B
chr1	155227478	155227917	440	6.36352	1.38587	6.39576	0.0114413	Promoter (<=1kb)	1	155213825	155227422	13598	2	2630	ENST00000368374.5	-56	ENSG00000160766	GBAP1	glucosylceramidase beta pseudogene 1
chr6	32664715	32667085	2371	5.35108	2.3983	4.49846	0.0339285	Promoter (<=1kb)	6	32659467	32666638	7172	2	3119	ENST00000487676.1	0	ENSG00000179344	HLA-DQB1	major histocompatibility complex, class II, DQ beta 1
chr13	51080241	51081034	794	5.15996	1.01651	4.98858	0.0255179	Promoter (<=1kb)	13	50994693	51080831	86139	2	2974	ENST00000533288.5	0	ENSG00000123201	GUCY1B2	guanylate cyclase 1 soluble subunit beta 2 (pseudogene)
chr7	102671328	102671925	598	4.70932	1.66219	3.47918	0.0621491	Promoter (<=1kb)	7	102637049	102671641	34593	2	246721	ENST00000476151.5	0	ENSG00000228049	POLR2J2	RNA polymerase II subunit J2
chr17	81662968	81663534	567	4.58333	2.72613	3.29459	0.0695121	Promoter (<=1kb)	17	81650740	81663104	12365	2	5148	ENST00000574777.1	0	ENSG00000185527	PDE6G	phosphodiesterase 6G
chr1	120723769	120724812	1044	4.57307	1.45137	4.28615	0.0384275	Promoter (<=1kb)	1	120723949	120840619	116671	1	101060684	ENST00000620612.5	0	ENSG00000273136	NBPF26	NBPF member 26
chr1	16895331	16897423	2093	4.52554	3.24995	3.02921	0.0817818	Promoter (<=1kb)	1	16895980	16896143	164	1	26870	ENST00000384278.1	0	ENSG00000207005	RNU1-2	RNA, U1 small nuclear 2
chr7	100217256	100217921	666	4.01169	2.95922	2.60708	0.106391	Promoter (<=1kb)	7	100218241	100219335	1095	1	10734	ENST00000471803.1	-320	ENSG00000066923	STAG3	stromal antigen 3
chr8	144109464	144109983	520	3.80817	1.31566	3.51642	0.0607672	Promoter (<=1kb)	8	144109699	144116390	6692	1	340390	ENST00000525150.5	0	ENSG00000179698	WDR97	WD repeat domain 97
chr4	143911338	143912713	1376	3.79967	1.14136	3.64763	0.0561526	Promoter (<=1kb)	4	143912306	143982454	70149	1	101927636	ENST00000659540.1	0	ENSG00000251600	LOC101927636	uncharacterized LOC101927636
chr2	37851450	37852584	1135	3.75862	1.3979	3.3174	0.0685538	Intron (ENST00000655678.1/101929559, intron 3 of 3)	2	37826247	37829432	3186	2	101929559	ENST00000413792.5	-22018	ENSG00000237803	LINC00211	long intergenic non-protein coding RNA 211
chr5	80216085	80216916	832	3.6482	1.16945	3.42996	0.0640273	Intron (ENST00000509193.5/256987, intron 1 of 12)	5	80177315	80255198	77884	2	256987	ENST00000513907.1	38282	ENSG00000164300	SERINC5	serine incorporator 5
chr1	16513360	16514886	1527	3.48282	3.21537	1.97979	0.159416	Promoter (<=1kb)	1	16514122	16514285	164	2	26871	ENST00000383925.1	0	ENSG00000206652	RNU1-1	RNA, U1 small nuclear 1
chr22	21689195	21690945	1751	3.3811	2.29773	2.24163	0.134343	Promoter (1-2kb)	22	21692833	21698249	5417	1	23759	ENST00000681735.1	-1888	ENSG00000100023	PPIL2	peptidylprolyl isomerase like 2
chr5	180649010	180650500	1491	3.21614	1.82705	2.28127	0.130948	Promoter (<=1kb)	5	180601506	180649600	48095	2	2324	ENST00000261937.11	0	ENSG00000037280	FLT4	fms related receptor tyrosine kinase 4
chr7	36691935	36693128	1194	3.21146	1.1245	2.82461	0.0928337	Intron (ENST00000617537.5/313, intron 1 of 20)	7	36623190	36661300	38111	2	313	ENST00000543742.1	-30635	ENSG00000136250	AOAH	acyloxyacyl hydrolase
chr1	75375642	75376847	1206	3.18829	1.84743	1.99743	0.15757	Intron (ENST00000370859.7/204962, intron 3 of 23)	1	75204475	75611084	406610	2	204962	ENST00000370855.5	234237	ENSG00000137968	SLC44A5	solute carrier family 44 member 5
chr19	52992894	52994139	1246	3.16866	3.09804	1.72021	0.18967	Promoter (<=1kb)	19	52968251	52993524	25274	2	79986	ENST00000270443.8	0	ENSG00000242779	ZNF702P	zinc finger protein 702, pseudogene
chr14	38064929	38066028	1100	3.16637	3.76762	1.58237	0.208424	Intron (ENST00000554687.1/105370456, intron 2 of 4)	14	38003113	38004847	1735	2	105370456	ENST00000554029.1	-60082	NA	LOC105370456	uncharacterized LOC105370456
chr20	25859673	25860345	673	3.16317	1.43018	2.42547	0.119381	Promoter (<=1kb)	20	25775255	25859903	84649	2	728882	ENST00000584356.1	0	NA	FAM182B	family with sequence similarity 182 member B
chr17	38947283	38948277	995	3.16276	1.02872	2.64273	0.104029	Intron (ENST00000378079.3/494188, intron 6 of 10)	17	38936432	38967403	30972	2	494188	ENST00000378079.3	19126	ENSG00000204952	FBXO47	F-box protein 47
chr22	39349367	39350470	1104	3.15475	1.42629	2.46389	0.116494	Promoter (<=1kb)	22	39349925	39378389	28465	1	9145	ENST00000318801.8	0	ENSG00000100321	SYNGR1	synaptogyrin 1
chr15	38072376	38073111	736	3.14525	1.00123	2.84098	0.0918921	Promoter (<=1kb)	15	38068812	38072990	4179	2	107984773	ENST00000559232.2	0	ENSG00000236914	LINC01852	long intergenic non-protein coding RNA 1852
chr11	62851318	62852242	925	3.11469	3.43825	1.58422	0.208158	Promoter (<=1kb)	11	62852910	62853035	126	2	9304	ENST00000384756.1	793	ENSG00000277194	SNORD22	small nucleolar RNA, C/D box 22
chr1	247857143	247858340	1198	3.08977	1.54467	2.29869	0.129487	Promoter (<=1kb)	1	247857187	247880138	22952	1	25893	ENST00000366481.4	0	ENSG00000162722	TRIM58	tripartite motif containing 58
chr17	65537788	65539040	1253	3.07276	2.37293	1.8427	0.174639	Promoter (1-2kb)	17	65533951	65536682	2732	2	8313	ENST00000578251.1	-1106	ENSG00000168646	AXIN2	axin 2
chr20	62824654	62826622	1969	3.03993	2.35071	1.83858	0.175122	Promoter (2-3kb)	20	62822609	62828976	6368	1	1299	ENST00000463487.2	2045	ENSG00000092758	COL9A3	collagen type IX alpha 3 chain
chr7	3103471	3104253	783	3.03876	1.31893	2.3761	0.123209	Intron (ENST00000667422.1/105375130, intron 1 of 1)	7	3084415	3118049	33635	2	105375130	ENST00000667422.1	13796	NA	LOC105375130	uncharacterized LOC105375130
chr19	53158197	53159594	1398	3.01443	3.44832	1.50469	0.219955	Promoter (<=1kb)	19	53124072	53159053	34982	2	84671	ENST00000601804.5	0	ENSG00000197937	ZNF347	zinc finger protein 347
chr19	45103058	45103819	762	2.97645	1.75092	2.01645	0.155607	Promoter (2-3kb)	19	45100064	45141386	41323	1	284352	ENST00000544897.5	2994	ENSG00000104866	PPP1R37	protein phosphatase 1 regulatory subunit 37
chr17	80988881	80989465	585	2.95662	1.91131	1.93987	0.163687	Promoter (2-3kb)	17	80991598	80999145	7548	1	79643	ENST00000572525.5	-2133	ENSG00000176108	CHMP6	charged multivesicular body protein 6
chr18	13375209	13377699	2491	2.92312	4.00254	1.34436	0.24627	Promoter (<=1kb)	18	13375083	13389812	14730	1	753	ENST00000676815.1	126	ENSG00000168675	LDLRAD4	low density lipoprotein receptor class A domain containing 4
chr8	121822225	121823488	1264	2.90684	1.66023	2.014	0.155858	Intron (ENST00000648171.1/594842, intron 6 of 8)	8	121668978	121697600	28623	2	105375732	ENST00000666599.1	-124625	NA	LINC02855	long intergenic non-protein coding RNA 2855
chr1	149708326	149709012	687	2.90351	1.12208	2.21008	0.137116	Intron (ENST00000617878.2/102723955, intron 3 of 4)	1	149701104	149705716	4613	1	644634	ENST00000651957.1	7222	NA	LOC644634	uncharacterized LOC644634
chr4	2570671	2571478	808	2.87265	1.91052	1.81958	0.177367	Intron (ENST00000508235.1/8603, intron 3 of 4)	4	2536647	2732573	195927	1	8603	ENST00000637812.2	34024	ENSG00000125386	FAM193A	family with sequence similarity 193 member A
chr7	99593970	99595575	1606	2.85322	1.57918	1.98149	0.159237	Promoter (2-3kb)	7	99598267	99611045	12779	1	100289187	ENST00000431679.6	-2692	ENSG00000244219	TMEM225B	transmembrane protein 225B
chr20	63819182	63820177	996	2.82429	1.08251	2.31322	0.128282	Intron (ENST00000245663.9/140685, intron 1 of 4)	20	63744525	63831244	86720	2	140685	ENST00000302995.2	11067	ENSG00000130584	ZBTB46	zinc finger and BTB domain containing 46
chr8	143617658	143618750	1093	2.81791	1.33636	2.06768	0.150454	Promoter (<=1kb)	8	143614821	143618048	3228	2	7264	ENST00000526290.1	0	ENSG00000104522	GFUS	GDP-L-fucose synthase
chr17	6752469	6753373	905	2.81766	1.11573	2.21977	0.136258	Promoter (2-3kb)	17	6755447	6758632	3186	1	54739	ENST00000573760.1	-2074	ENSG00000132530	XAF1	XIAP associated factor 1
chr17	80133295	80133755	461	2.81722	1.83056	1.74481	0.186534	Promoter (2-3kb)	17	80135264	80136322	1059	2	9775	ENST00000570625.5	2567	ENSG00000141543	EIF4A3	eukaryotic translation initiation factor 4A3
chr4	153518339	153519153	815	2.81363	1.7886	1.83461	0.175587	Intron (ENST00000409663.7/23240, intron 3 of 34)	4	153554181	153558771	4591	1	23240	ENST00000462540.1	-35028	ENSG00000121210	TMEM131L	transmembrane 131 like
chr5	80218345	80219133	789	2.79896	1.30655	2.05376	0.151835	Intron (ENST00000509193.5/256987, intron 1 of 12)	5	80177315	80255198	77884	2	256987	ENST00000513907.1	36065	ENSG00000164300	SERINC5	serine incorporator 5
chr2	950067	951114	1048	2.78705	1.85841	1.76771	0.18367	Promoter (<=1kb)	2	949627	950274	648	2	101060391	ENST00000456949.2	0	NA	SNTG2-AS1	SNTG2 antisense RNA 1
chr19	18274366	18274873	508	2.76658	3.78425	1.2439	0.264725	Promoter (<=1kb)	19	18257097	18274509	17413	2	80726	ENST00000612316.4	0	ENSG00000130518	IQCN	IQ motif containing N
chr19	12155830	12157061	1232	2.76643	1.33934	2.00908	0.156364	Promoter (<=1kb)	19	12132117	12156731	24615	2	100529855	ENST00000430024.5	0	NA	ZNF625-ZNF20	ZNF625-ZNF20 readthrough (NMD candidate)
chr17	80134749	80135656	908	2.75844	2.01695	1.60461	0.205255	Promoter (<=1kb)	17	80135264	80136322	1059	2	9775	ENST00000570625.5	666	ENSG00000141543	EIF4A3	eukaryotic translation initiation factor 4A3
chr1	121401186	121402198	1013	2.75595	1.97294	1.68667	0.194044	Promoter (2-3kb)	1	121397478	121398806	1329	2	100873165	ENST00000429055.1	-2380	ENSG00000230806	SRGAP2-AS1	SRGAP2 antisense RNA 1
chr14	99218201	99218644	444	2.72812	1.37955	1.86697	0.171826	Intron (ENST00000345514.2/64919, intron 2 of 2)	14	99169287	99271485	102199	2	64919	ENST00000345514.2	52841	ENSG00000127152	BCL11B	BAF chromatin remodeling complex subunit BCL11B
chr19	43901413	43902152	740	2.7276	1.21447	2.04045	0.153168	Promoter (<=1kb)	19	43891804	43901805	10002	2	100505715	ENST00000587128.1	0	ENSG00000267058	LOC100505715	uncharacterized LOC100505715
chr17	38877055	38877536	482	2.72106	1.1975	2.03007	0.154218	Intron (ENST00000433206.6/3927, intron 1 of 5)	17	38873890	38915141	41252	1	3927	ENST00000419929.1	3165	ENSG00000002834	LASP1	LIM and SH3 protein 1
chr14	34017910	34019489	1580	2.71266	2.28956	1.53068	0.216014	Promoter (<=1kb)	14	33985153	34018655	33503	2	102724945	ENST00000550114.5	0	NA	LOC102724945	uncharacterized LOC102724945
chr19	45475042	45476431	1390	2.69693	5.92106	0.980092	0.322179	Promoter (2-3kb)	19	45407334	45478828	71495	2	2067	ENST00000423698.6	2397	ENSG00000012061	ERCC1	ERCC excision repair 1, endonuclease non-catalytic subunit
chr19	2461978	2462618	641	2.69329	1.07176	2.11154	0.146196	Promoter (<=1kb)	19	2458935	2462185	3251	2	101928602	ENST00000587826.1	0	ENSG00000267201	LINC01775	long intergenic non-protein coding RNA 1775
chr11	62798698	62799147	450	2.69325	1.6919	1.67378	0.195756	Promoter (<=1kb)	11	62796149	62798606	2458	2	10482	ENST00000531872.5	-92	ENSG00000162231	NXF1	nuclear RNA export factor 1
chr19	58097816	58099069	1254	2.68438	4.94711	1.05816	0.303638	Promoter (<=1kb)	19	58083839	58098210	14372	2	65982	ENST00000240727.10	0	ENSG00000121413	ZSCAN18	zinc finger and SCAN domain containing 18
chr22	39351528	39352529	1002	2.67582	1.05761	2.0992	0.14738	Promoter (1-2kb)	22	39350006	39376210	26205	1	9145	ENST00000489206.1	1522	ENSG00000100321	SYNGR1	synaptogyrin 1
chr17	67468939	67469821	883	2.67456	1.35958	1.87375	0.17105	Promoter (1-2kb)	17	67471489	67471585	97	1	100500895	ENST00000384955.2	-1668	ENSG00000207688	MIR548AA2	microRNA 548aa-2
chr1	8945944	8947562	1619	2.67383	1.73598	1.69993	0.1923	Promoter (<=1kb)	1	8945887	8974704	28818	1	765	ENST00000377442.3	57	ENSG00000131686	CA6	carbonic anhydrase 6
chr14	100567118	100568878	1761	2.6697	1.51986	1.78792	0.181184	Promoter (<=1kb)	14	100537147	100568070	30924	2	57596	ENST00000557378.6	0	ENSG00000183092	BEGAIN	brain enriched guanylate kinase associated
chr9	137150866	137152002	1137	2.66894	1.1404	2.0414	0.153072	Promoter (1-2kb)	9	137149009	137165296	16288	1	2902	ENST00000675295.1	1857	ENSG00000176884	GRIN1	glutamate ionotropic receptor NMDA type subunit 1
chr17	6936352	6937271	920	2.65408	1.57714	1.7532	0.185479	Intron (ENST00000574183.1/ENST00000574183.1, intron 1 of 1)	17	6898910	6900345	1436	1	245	ENST00000575787.1	37442	ENSG00000262943	ALOX12P2	arachidonate 12-lipoxygenase pseudogene 2
chr17	74531575	74533250	1676	2.6441	1.70841	1.67845	0.195134	Promoter (<=1kb)	17	74521174	74531475	10302	2	124599	ENST00000392621.6	-100	ENSG00000178789	CD300LB	CD300 molecule like family member b
chr11	114179068	114179902	835	2.63405	1.9463	1.56691	0.21066	Promoter (<=1kb)	11	114180766	114247296	66531	1	7704	ENST00000545851.5	-864	ENSG00000109906	ZBTB16	zinc finger and BTB domain containing 16
chr9	63337980	63338558	579	2.62831	1.11428	2.00399	0.15689	Intron (ENST00000444603.2/100996643, intron 2 of 2)	9	63334598	63343660	9063	1	100996643	ENST00000432011.2	3382	ENSG00000182021	LOC100996643	methylenetetrahydrofolate dehydrogenase (NADP+ dependent) 1 like pseudogene
chr5	95816979	95818759	1781	2.62726	2.90105	1.28374	0.257208	Promoter (<=1kb)	5	95813979	95819502	5524	2	2745	ENST00000507412.1	743	ENSG00000173221	GLRX	glutaredoxin
chr8	144456264	144457364	1101	2.60348	1.86416	1.56634	0.210743	Promoter (<=1kb)	8	144449582	144457641	8060	2	50626	ENST00000528663.1	277	ENSG00000187954	CYHR1	cysteine and histidine rich 1
chr17	44438399	44439508	1110	2.59807	1.16773	1.91785	0.166097	Promoter (1-2kb)	17	44396574	44436787	40214	2	23131	ENST00000635257.1	-1612	ENSG00000186566	GPATCH8	G-patch domain containing 8
chr4	185255535	185256659	1125	2.58399	1.41724	1.74889	0.18602	Intron (ENST00000618785.4/83891, intron 2 of 17)	4	185295827	185363510	67684	1	83891	ENST00000512853.5	-39168	ENSG00000109762	SNX25	sorting nexin 25
chr14	105290542	105291359	818	2.57416	1.9699	1.48403	0.223148	Intron (ENST00000379937.6/2972, intron 1 of 16)	14	105226123	105300468	74346	2	2972	ENST00000546417.5	9109	ENSG00000185024	BRF1	BRF1 RNA polymerase III transcription initiation factor subunit
chr15	92894138	92894677	540	2.5737	1.23287	1.80895	0.178638	Intron (ENST00000653163.1/100507217, intron 4 of 4)	15	92900189	93022162	121974	1	1106	ENST00000626874.2	-5512	ENSG00000173575	CHD2	chromodomain helicase DNA binding protein 2
chr17	74670972	74671675	704	2.56891	1.20878	1.81307	0.178144	Promoter (<=1kb)	17	74671141	74745874	74734	1	326624	ENST00000402449.8	0	ENSG00000172794	RAB37	RAB37, member RAS oncogene family
chr19	8363367	8364640	1274	2.56388	2.23911	1.40003	0.236722	Promoter (<=1kb)	19	8364155	8374370	10216	1	51129	ENST00000301455.7	0	ENSG00000167772	ANGPTL4	angiopoietin like 4
chr17	81396693	81397220	528	2.56187	1.50759	1.64601	0.199506	Promoter (1-2kb)	17	81395475	81466331	70857	1	57597	ENST00000584436.7	1218	ENSG00000266074	BAHCC1	BAH domain and coiled-coil containing 1
chr19	51570780	51571857	1078	2.55153	1.9878	1.46705	0.225815	Promoter (<=1kb)	19	51571283	51592510	21228	1	7728	ENST00000262259.7	0	ENSG00000105497	ZNF175	zinc finger protein 175
chr2	68519522	68520924	1403	2.54417	1.6541	1.56898	0.210359	Intron (ENST00000529851.5/200558, intron 4 of 8)	2	68529638	68630724	101087	1	200558	ENST00000471727.3	-8714	ENSG00000169621	APLF	aprataxin and PNKP like factor
chr2	238231102	238231919	818	2.53958	2.93438	1.19976	0.273373	Promoter (<=1kb)	2	238224552	238231585	7034	2	151174	ENST00000475669.5	0	ENSG00000186235	LINC02610	long intergenic non-protein coding RNA 2610
chr7	3106463	3108031	1569	2.53201	2.64485	1.25582	0.262448	Intron (ENST00000667422.1/105375130, intron 1 of 1)	7	3084415	3118049	33635	2	105375130	ENST00000667422.1	10018	NA	LOC105375130	uncharacterized LOC105375130
chr21	26843542	26845977	2436	2.52993	3.1012	1.15863	0.281753	Promoter (<=1kb)	21	26835755	26845409	9655	2	9510	ENST00000284984.8	0	ENSG00000154734	ADAMTS1	ADAM metallopeptidase with thrombospondin type 1 motif 1
chr20	64092026	64093424	1399	2.52197	1.36012	1.69969	0.192332	Promoter (<=1kb)	20	64091966	64100633	8668	1	4987	ENST00000672146.2	60	ENSG00000125510	OPRL1	opioid related nociceptin receptor 1
chr19	36666138	36667696	1559	2.51932	3.85528	1.04824	0.305917	Promoter (<=1kb)	19	36636618	36666837	30220	2	92283	ENST00000588268.6	0	ENSG00000197808	ZNF461	zinc finger protein 461
chr19	4302285	4304850	2566	2.51603	2.35309	1.31467	0.251554	Promoter (<=1kb)	19	4292232	4302393	10162	2	126259	ENST00000595645.5	0	ENSG00000167664	TMIGD2	transmembrane and immunoglobulin domain containing 2
chr11	66421351	66422326	976	2.51163	2.37409	1.30776	0.252804	Promoter (<=1kb)	11	66421091	66426055	4965	1	266743	ENST00000525148.1	260	ENSG00000174576	NPAS4	neuronal PAS domain protein 4
chr14	92547501	92548608	1108	2.50941	2.61175	1.23191	0.267039	Intron (ENST00000216487.12/79890, intron 1 of 9)	14	92555840	92616028	60189	1	79890	ENST00000556385.5	-7232	ENSG00000100599	RIN3	Ras and Rab interactor 3
chr14	74792505	74793931	1427	2.50829	1.02596	1.88658	0.169592	Intron (ENST00000325680.12/56252, intron 4 of 20)	14	74781385	74836190	54806	1	56252	ENST00000549293.5	11120	ENSG00000119596	YLPM1	YLP motif containing 1
chr3	187020232	187020863	632	2.50604	1.52945	1.58653	0.207827	Promoter (<=1kb)	3	187021855	187042839	20985	1	6480	ENST00000440338.5	-992	ENSG00000073849	ST6GAL1	ST6 beta-galactoside alpha-2,6-sialyltransferase 1
chr17	67398612	67399398	787	2.50367	1.93804	1.41281	0.234594	Intron (ENST00000581322.6/26207, intron 1 of 8)	17	67378966	67578225	199260	1	26207	ENST00000584471.5	19646	ENSG00000154217	PITPNC1	phosphatidylinositol transfer protein cytoplasmic 1
chr19	4769370	4770088	719	2.50055	1.28365	1.69293	0.193219	Promoter (<=1kb)	19	4770073	4772468	2396	1	284424	ENST00000662608.1	0	ENSG00000176840	MIR7-3HG	MIR7-3 host gene
chr7	90153994	90154801	808	2.49897	2.12055	1.36443	0.242775	Promoter (<=1kb)	7	90154456	90162251	7796	1	26872	ENST00000475789.1	0	ENSG00000164647	STEAP1	STEAP family member 1
chr7	44104291	44105281	991	2.49626	1.45263	1.58302	0.208329	Promoter (<=1kb)	7	44104345	44114560	10216	1	165	ENST00000223357.8	0	ENSG00000106624	AEBP1	AE binding protein 1
chr1	23627036	23628176	1141	2.49267	2.4512	1.26479	0.26075	Promoter (<=1kb)	1	23627334	23640568	13235	1	259283	ENST00000374555.7	0	ENSG00000197880	MDS2	myelodysplastic syndrome 2 translocation associated
chr15	92889618	92890913	1296	2.49206	1.91211	1.42818	0.232066	Promoter (1-2kb)	15	92887756	92898072	10317	1	100507217	ENST00000555520.1	1862	NA	CHASERR	CHD2 adjacent suppressive regulatory RNA
chr1	40795169	40796272	1104	2.49191	1.26946	1.68645	0.194073	Intron (ENST00000347132.10/9132, intron 1 of 13)	1	40784094	40838523	54430	1	9132	ENST00000509682.6	11075	ENSG00000117013	KCNQ4	potassium voltage-gated channel subfamily Q member 4
chr19	20423556	20425106	1551	2.49168	4.20794	0.99231	0.319181	Promoter (<=1kb)	19	20340269	20424969	84701	2	664701	ENST00000542380.5	0	NA	ZNF826P	zinc finger protein 826, pseudogene
chr15	23565391	23566635	1245	2.49016	1.98213	1.40327	0.236181	Promoter (<=1kb)	15	23565674	23568044	2371	1	7681	ENST00000314520.6	0	ENSG00000179455	MKRN3	makorin ring finger protein 3
chr14	75282453	75284377	1925	2.47518	5.89079	0.842744	0.358616	Promoter (2-3kb)	14	75280193	75281587	1395	1	2353	ENST00000555347.1	2260	ENSG00000170345	FOS	Fos proto-oncogene, AP-1 transcription factor subunit
chr1	72282199	72284889	2691	2.47307	3.75167	1.02335	0.311729	Promoter (<=1kb)	1	72283170	72618656	335487	1	105378797	ENST00000653965.1	0	NA	LOC105378797	uncharacterized LOC105378797
chr17	77106781	77107904	1124	2.47272	1.16293	1.75973	0.184662	Intron (ENST00000561721.6/6397, intron 3 of 4)	17	77089417	77089497	81	1	102466864	ENST00000630554.1	17364	ENSG00000284250	MIR6516	microRNA 6516
chr17	42107312	42108273	962	2.46967	3.39848	1.06592	0.301872	Promoter (<=1kb)	17	42103608	42107848	4241	2	79132	ENST00000590637.1	0	ENSG00000108771	DHX58	DExH-box helicase 58
chr2	105769693	105770794	1102	2.46832	1.99768	1.37568	0.240843	Intron (ENST00000233154.9/8440, intron 1 of 4)	2	105745731	105881534	135804	1	8440	ENST00000393348.6	23962	ENSG00000071051	NCK2	NCK adaptor protein 2
chr17	3557502	3559090	1589	2.46431	1.38723	1.61788	0.203391	Promoter (<=1kb)	17	3510502	3557812	47311	2	162514	ENST00000576742.6	0	ENSG00000167723	TRPV3	transient receptor potential cation channel subfamily V member 3
chr1	156356653	156357552	900	2.46337	1.59884	1.51899	0.217776	Intron (ENST00000413555.5/7203, intron 1 of 7)	1	156320839	156367837	46999	2	7203	ENST00000463132.5	10285	ENSG00000163468	CCT3	chaperonin containing TCP1 subunit 3
chr15	89378008	89379277	1270	2.45753	1.37157	1.61645	0.203591	Promoter (<=1kb)	15	89378563	89396795	18233	1	254559	ENST00000558754.6	0	ENSG00000255571	MIR9-3HG	MIR9-3 host gene
chr14	38073730	38075323	1594	2.45235	2.86691	1.14253	0.285122	Intron (ENST00000554687.1/105370456, intron 2 of 4)	14	38003113	38004847	1735	2	105370456	ENST00000554029.1	-68883	NA	LOC105370456	uncharacterized LOC105370456
chr17	6656976	6657839	864	2.451	1.64944	1.48173	0.223507	Promoter (<=1kb)	17	6657034	6693211	36178	1	100652883	ENST00000634558.1	0	NA	ALOX15P1	arachidonate 15-lipoxygenase pseudogene 1
chr2	38743872	38744591	720	2.45052	3.17387	1.0792	0.29888	Promoter (2-3kb)	2	38744895	38747044	2150	2	6432	ENST00000477635.5	2453	ENSG00000115875	SRSF7	serine and arginine rich splicing factor 7
chr1	8382788	8383479	692	2.44783	1.16067	1.70811	0.191234	Intron (ENST00000337907.7/473, intron 13 of 23)	1	8363710	8364838	1129	2	473	ENST00000464367.1	-17950	ENSG00000142599	RERE	arginine-glutamic acid dipeptide repeats
chr19	18270958	18273121	2164	2.44746	5.14857	0.880859	0.347969	Promoter (1-2kb)	19	18267119	18274411	7293	2	80726	ENST00000595654.6	1290	ENSG00000130518	IQCN	IQ motif containing N
chr22	20697246	20697842	597	2.44625	2.29261	1.27261	0.259281	Intron (ENST00000427789.3/107985584, intron 4 of 4)	22	20701114	20704606	3493	1	84222	ENST00000450925.6	-3272	ENSG00000226287	TMEM191A	transmembrane protein 191A (pseudogene)
chr1	54356217	54357170	954	2.44572	1.20667	1.65644	0.198089	Promoter (<=1kb)	1	54225433	54356818	131386	2	23648	ENST00000326956.12	0	ENSG00000157216	SSBP3	single stranded DNA binding protein 3
chr20	63941109	63942573	1465	2.44393	3.5028	1.03245	0.309587	Promoter (<=1kb)	20	63941465	63941544	80	2	100302137	ENST00000607800.1	0	ENSG00000284433	MIR1914	microRNA 1914
chr16	31188611	31189195	585	2.43914	2.04865	1.32732	0.249286	Promoter (<=1kb)	16	31188467	31189695	1229	1	2521	ENST00000564766.1	144	ENSG00000089280	FUS	FUS RNA binding protein
chr19	35881922	35882602	681	2.43839	1.03763	1.78643	0.181366	Promoter (2-3kb)	19	35879227	35879791	565	1	333	ENST00000591165.1	2695	ENSG00000105290	APLP1	amyloid beta precursor like protein 1
chr1	120849736	120851497	1762	2.43835	4.45014	0.932394	0.334245	Promoter (<=1kb)	1	120849674	120850985	1312	2	101954277	ENST00000664186.1	0	ENSG00000275538	RNVU1-19	RNA, variant U1 small nuclear 19
chr3	128489040	128490191	1152	2.43369	2.27937	1.25391	0.262811	Promoter (<=1kb)	3	128489212	128497366	8155	1	101927167	ENST00000464242.1	0	NA	GATA2-AS1	GATA2 antisense RNA 1
chr8	19013223	19014526	1304	2.43009	2.67477	1.15785	0.281916	Promoter (<=1kb)	8	18527303	19013686	486384	2	23362	ENST00000440756.4	0	ENSG00000156011	PSD3	pleckstrin and Sec7 domain containing 3
chr7	128476288	128477442	1155	2.42431	3.91396	0.971744	0.324249	Promoter (<=1kb)	7	128476729	128502126	25398	1	55798	ENST00000482555.5	0	ENSG00000165055	METTL2B	methyltransferase 2B, methylcytidine
chr7	107560786	107561284	499	2.42354	2.10129	1.30735	0.252878	Promoter (2-3kb)	7	107563484	107567188	3705	1	11062	ENST00000498786.5	-2200	ENSG00000105865	DUS4L	dihydrouridine synthase 4 like
chr4	2817771	2818648	878	2.42293	1.50591	1.51044	0.219075	Promoter (<=1kb)	4	2818185	2834289	16105	1	6452	ENST00000511747.6	0	ENSG00000087266	SH3BP2	SH3 domain binding protein 2
chr14	24058027	24059064	1038	2.41685	1.48203	1.52196	0.217327	Promoter (<=1kb)	14	24057215	24069726	12512	1	90668	ENST00000559694.5	812	ENSG00000186648	CARMIL3	capping protein regulator and myosin 1 linker 3
chr1	167460786	167461403	618	2.40956	2.21354	1.22216	0.268941	Intron (ENST00000362089.10/919, intron 1 of 7)	1	167455195	167458646	3452	1	101928512	ENST00000660512.1	5591	NA	LOC101928512	uncharacterized LOC101928512
chr11	82732884	82734059	1176	2.40774	1.38055	1.54441	0.213967	Promoter (<=1kb)	11	82729940	82733864	3925	2	220382	ENST00000329203.5	0	ENSG00000182103	FAM181B	family with sequence similarity 181 member B
chr17	75776330	75777475	1146	2.40017	4.32598	0.915896	0.338558	Promoter (1-2kb)	17	75778567	75779286	720	2	3021	ENST00000587560.5	1811	ENSG00000132475	H3-3B	H3.3 histone B
chr4	142353266	142353734	469	2.39562	1.41378	1.51775	0.217964	Intron (ENST00000513000.5/8821, intron 8 of 26)	4	142082053	142305944	223892	2	8821	ENST00000511838.5	-47322	ENSG00000109452	INPP4B	inositol polyphosphate-4-phosphatase type II B
chr17	43917047	43918130	1084	2.39456	2.27054	1.22632	0.268127	Promoter (<=1kb)	17	43914433	43917399	2967	2	105371787	ENST00000591374.5	0	NA	LOC105371787	uncharacterized LOC105371787
chr6	73513221	73514788	1568	2.38895	3.94292	0.941239	0.331962	Intron (ENST00000676547.1/1915, intron 6 of 6)	6	73517519	73518811	1293	2	1915	ENST00000679031.1	4023	ENSG00000156508	EEF1A1	eukaryotic translation elongation factor 1 alpha 1
chr9	132405908	132407228	1321	2.38728	3.10977	1.04268	0.307203	Promoter (<=1kb)	9	132375548	132406840	31293	2	7270	ENST00000334270.3	0	ENSG00000125482	TTF1	transcription termination factor 1
chr11	64007277	64008251	975	2.38472	1.15015	1.63396	0.20116	Intron (ENST00000255681.7/28992, intron 4 of 10)	11	64001115	64001767	653	1	101927673	ENST00000536943.1	6162	NA	LOC101927673	uncharacterized LOC101927673
chr19	37550984	37551916	933	2.38421	1.04161	1.67207	0.195986	Promoter (<=1kb)	19	37551371	37587348	35978	1	100507433	ENST00000590838.5	0	ENSG00000267470	ZNF571-AS1	ZNF571 antisense RNA 1
chr2	2056788	2057962	1175	2.38161	2.09254	1.26113	0.261441	Intron (ENST00000647755.1/23040, intron 3 of 24)	2	1972368	1979777	7410	2	23040	ENST00000649587.1	-77011	ENSG00000186487	MYT1L	myelin transcription factor 1 like
chr9	99806878	99808020	1143	2.3797	1.18123	1.62777	0.202015	Intron (ENST00000652827.1/107987011, intron 1 of 5)	9	99585786	99819889	234104	2	101928438	ENST00000427039.1	11869	ENSG00000237461	LOC101928438	uncharacterized LOC101928438
chr19	56476807	56478327	1521	2.37855	3.43103	0.986933	0.320496	Promoter (<=1kb)	19	56477567	56495439	17873	1	100128252	ENST00000670294.1	0	ENSG00000166770	ZNF667-AS1	ZNF667 antisense RNA 1 (head to head)
chr16	89330454	89331901	1448	2.37536	2.64107	1.11906	0.290124	Promoter (1-2kb)	16	89300696	89328986	28291	2	29123	ENST00000563291.1	-1468	ENSG00000167522	ANKRD11	ankyrin repeat domain 11
chr14	38078154	38079385	1232	2.37374	2.9103	1.0686	0.301265	Intron (ENST00000554687.1/105370456, intron 2 of 4)	14	38003113	38004847	1735	2	105370456	ENST00000554029.1	-73307	NA	LOC105370456	uncharacterized LOC105370456
chr8	12658994	12659924	931	2.37343	1.43252	1.47904	0.223928	Promoter (<=1kb)	8	12626392	12659651	33260	2	729732	ENST00000636990.1	0	ENSG00000283674	LOC729732	uncharacterized LOC729732
chr21	45255468	45257422	1955	2.37343	1.09737	1.67075	0.196162	Promoter (<=1kb)	21	45257922	45264545	6624	1	114042	ENST00000670960.1	-500	ENSG00000182586	LINC00334	long intergenic non-protein coding RNA 334
chr9	133238294	133239852	1559	2.37338	2.01567	1.28104	0.257709	Intron (ENST00000679909.1/28, intron 1 of 1)	9	133205280	133209250	3971	2	29989	ENST00000618116.4	-29044	ENSG00000171102	OBP2B	odorant binding protein 2B
chr1	25631907	25632844	938	2.37173	1.09141	1.66383	0.197091	Intron (ENST00000374332.9/57134, intron 1 of 11)	1	25617850	25784450	166601	1	57134	ENST00000263979.7	14057	ENSG00000117643	MAN1C1	mannosidase alpha class 1C member 1
chr17	7552474	7553098	625	2.37158	1.91307	1.30891	0.252595	Promoter (2-3kb)	17	7549778	7557574	7797	1	8742	ENST00000462811.1	2696	ENSG00000239697	TNFSF12	TNF superfamily member 12
chr22	30605743	30607411	1669	2.36766	1.6867	1.37739	0.24055	Promoter (<=1kb)	22	30576628	30607083	30456	2	23481	ENST00000402281.5	0	ENSG00000100029	PES1	pescadillo ribosomal biogenesis factor 1
chr1	153993276	153994025	750	2.35834	2.84869	1.05806	0.303662	Promoter (2-3kb)	1	153990921	153992146	1226	1	6232	ENST00000477151.2	2355	ENSG00000177954	RPS27	ribosomal protein S27
chr2	97589471	97591034	1564	2.35806	3.50229	0.96773	0.32525	Promoter (<=1kb)	2	97492663	97589721	97059	2	57730	ENST00000359901.8	0	ENSG00000196912	ANKRD36B	ankyrin repeat domain 36B
chr14	61406648	61407563	916	2.35797	1.49389	1.44462	0.229397	Intron (ENST00000555185.5/5583, intron 1 of 3)	14	61390694	61457557	66864	1	5583	ENST00000557585.5	15954	ENSG00000027075	PRKCH	protein kinase C eta
chr4	89438126	89438839	714	2.35702	1.45914	1.46384	0.226324	Intron (ENST00000659878.1/105377329, intron 1 of 2)	4	89410960	89726647	315688	1	105377329	ENST00000659878.1	27166	NA	LOC105377329	uncharacterized LOC105377329
chr4	153683999	153685105	1107	2.35341	2.32795	1.16996	0.279413	Promoter (<=1kb)	4	153684070	153703646	19577	1	7097	ENST00000646900.1	0	ENSG00000137462	TLR2	toll like receptor 2
chr7	98400508	98401753	1246	2.35239	3.11939	1.01373	0.314013	Promoter (<=1kb)	7	98291650	98401090	109441	2	55971	ENST00000005260.9	0	ENSG00000006453	BAIAP2L1	BAR/IMD domain containing adaptor protein 2 like 1
chr6	25070517	25071367	851	2.34641	2.65586	1.09066	0.296329	Intron (ENST00000648291.1/ENST00000648291.1, intron 2 of 5)	6	25081068	25084785	3718	2	8418	ENST00000471416.2	13418	ENSG00000168405	CMAHP	cytidine monophospho-N-acetylneuraminic acid hydroxylase, pseudogene
chr1	161216620	161217928	1309	2.34093	2.41962	1.13784	0.286112	Promoter (1-2kb)	1	161215295	161219245	3951	1	2207	ENST00000289902.2	1325	ENSG00000158869	FCER1G	Fc fragment of IgE receptor Ig
chr3	102113918	102115015	1098	2.33958	2.34954	1.15604	0.282292	Intron (ENST00000491959.5/131368, intron 2 of 17)	3	102099244	102477677	378434	1	131368	ENST00000491959.5	14674	ENSG00000170044	ZPLD1	zona pellucida like domain containing 1
chr1	226656368	226656919	552	2.33828	2.80182	1.03828	0.308225	Promoter (2-3kb)	1	226656640	226659670	3031	2	100506443	ENST00000443422.1	2751	NA	ITPKB-IT1	ITPKB intronic transcript 1
chr1	18934205	18935662	1458	2.33794	1.50103	1.42125	0.233202	Intron (ENST00000455833.7/126917, intron 1 of 8)	1	18908340	18955698	47359	2	126917	ENST00000416166.1	20036	ENSG00000169991	IFFO2	intermediate filament family orphan 2
chr7	99598397	99599538	1142	2.33642	1.59782	1.37381	0.241161	Promoter (<=1kb)	7	99598285	99605559	7275	1	100289187	ENST00000429679.1	112	ENSG00000244219	TMEM225B	transmembrane protein 225B
chr16	12458537	12459826	1290	2.33617	1.64735	1.33836	0.247328	Intron (ENST00000566228.6/92017, intron 18 of 20)	16	12372823	12373897	1075	1	105371087	ENST00000561528.1	85714	NA	LOC105371087	uncharacterized LOC105371087
chr1	228173608	228175060	1453	2.33548	1.92575	1.26959	0.259846	Promoter (<=1kb)	1	228174550	228175575	1026	1	200205	ENST00000546123.2	0	ENSG00000181873	IBA57	iron-sulfur cluster assembly factor IBA57
chr3	18786258	18787656	1399	2.33324	2.48918	1.10567	0.293028	Intron (ENST00000626982.2/101927777, intron 4 of 4)	3	18745744	18747491	1748	1	105376976	ENST00000453361.1	40514	NA	LOC105376976	uncharacterized LOC105376976
chr4	155667008	155668590	1583	2.33238	1.75441	1.31835	0.250892	Promoter (<=1kb)	4	155667042	155730445	63404	1	2982	ENST00000509901.5	0	ENSG00000164116	GUCY1A1	guanylate cyclase 1 soluble subunit alpha 1
chr8	28375194	28376042	849	2.32751	1.30592	1.49344	0.221688	Promoter (<=1kb)	8	28356690	28375379	18690	2	55893	ENST00000521912.1	0	ENSG00000186918	ZNF395	zinc finger protein 395
chr17	78484396	78485377	982	2.32439	1.81731	1.28124	0.257671	Promoter (<=1kb)	17	78484882	78490105	5224	1	100996295	ENST00000588565.5	0	NA	DNAH17-AS1	DNAH17 antisense RNA 1
chr17	83205311	83206054	744	2.32385	1.07149	1.62142	0.202898	Intron (ENST00000652318.1/101929650, intron 2 of 3)	17	83211996	83220929	8934	1	101929650	ENST00000572850.1	-5942	NA	LOC101929650	uncharacterized LOC101929650
chr9	129258111	129259214	1104	2.31879	3.37663	0.952786	0.329014	Promoter (<=1kb)	9	129258354	129259865	1512	1	105376290	ENST00000427080.2	0	NA	IER5L-AS1	IER5L antisense RNA 1
chr19	57583619	57584670	1052	2.31878	2.79287	1.04168	0.307433	Promoter (<=1kb)	19	57584140	57593777	9638	1	284307	ENST00000536878.6	0	ENSG00000171649	ZIK1	zinc finger protein interacting with K protein 1
chr8	102662083	102663273	1191	2.31819	2.47002	1.11182	0.29169	Intron (ENST00000640504.1/101927245, intron 1 of 4)	8	102656464	102687118	30655	1	101927245	ENST00000640504.1	5619	NA	LOC101927245	uncharacterized LOC101927245
chr2	237627187	237628294	1108	2.31716	1.4591	1.40476	0.235932	Promoter (<=1kb)	2	237627587	237781643	154057	1	9208	ENST00000308482.14	0	ENSG00000124831	LRRFIP1	LRR binding FLII interacting protein 1
chr14	90405264	90406688	1425	2.31503	2.77861	1.03604	0.308749	Promoter (1-2kb)	14	90404168	90404785	618	1	801	ENST00000556721.1	1096	ENSG00000198668	CALM1	calmodulin 1
chr6	35737381	35737970	590	2.31482	1.1186	1.56893	0.210367	Promoter (<=1kb)	6	35737092	35738509	1418	1	221481	ENST00000471400.1	289	ENSG00000157343	ARMC12	armadillo repeat containing 12
chr12	46360903	46362216	1314	2.31126	1.28248	1.47291	0.224891	Promoter (<=1kb)	12	46361853	46362542	690	2	54407	ENST00000548785.1	326	ENSG00000134294	SLC38A2	solute carrier family 38 member 2
chr2	233230779	233231537	759	2.30972	1.36895	1.4565	0.227492	Intron (ENST00000431917.5/55054, intron 2 of 5)	2	233251571	233295673	44103	1	55054	ENST00000347464.9	-20034	ENSG00000085978	ATG16L1	autophagy related 16 like 1
chr21	44949334	44950331	998	2.30881	1.16135	1.55496	0.212408	Intron (ENST00000397826.7/85395, intron 2 of 5)	21	44958246	44976973	18728	1	85395	ENST00000479127.5	-7915	ENSG00000160256	SLX9	SLX9 ribosome biogenesis factor
chr19	48266830	48267844	1015	2.30801	1.02081	1.63	0.201707	Promoter (2-3kb)	19	48270081	48287608	17528	1	163071	ENST00000595607.6	-2237	ENSG00000178150	ZNF114	zinc finger protein 114
chr2	37832524	37833959	1436	2.30629	1.47474	1.40511	0.235873	Intron (ENST00000655678.1/101929559, intron 3 of 3)	2	37826247	37829432	3186	2	101929559	ENST00000413792.5	-3092	ENSG00000237803	LINC00211	long intergenic non-protein coding RNA 211
chr4	825104	826182	1079	2.30412	1.61787	1.33265	0.248337	Promoter (<=1kb)	4	784957	826129	41173	2	10815	ENST00000304062.11	0	ENSG00000168993	CPLX1	complexin 1
chr10	80483962	80485015	1054	2.30307	2.88637	1.01372	0.314016	Intron (ENST00000429989.7/81619, intron 1 of 8)	10	80489212	80519628	30417	1	81619	ENST00000616406.1	-4197	ENSG00000108219	TSPAN14	tetraspanin 14
chr19	18251730	18252433	704	2.30181	1.9457	1.22696	0.268002	Promoter (<=1kb)	19	18250139	18252431	2293	2	729966	ENST00000600667.2	0	ENSG00000284797	LOC729966	uncharacterized LOC729966
chr19	58058955	58059847	893	2.29732	1.44074	1.39236	0.238011	Promoter (<=1kb)	19	58059239	58069405	10167	1	7694	ENST00000359978.10	0	ENSG00000176293	ZNF135	zinc finger protein 135
chr21	29449176	29450290	1115	2.29439	3.10188	0.972651	0.324023	Intron (ENST00000422809.5/571, intron 2 of 4)	21	29496047	29500386	4340	1	54147	ENST00000429843.1	-45757	ENSG00000234293	BACH1-IT3	BACH1 intronic transcript 3
chr10	103685758	103686790	1033	2.29306	1.2489	1.48473	0.22304	Intron (ENST00000369774.8/9644, intron 6 of 14)	10	103599520	103693623	94104	2	9644	ENST00000315994.6	6833	ENSG00000107957	SH3PXD2A	SH3 and PX domains 2A
chr6	125831795	125832671	877	2.29306	1.00218	1.63728	0.200703	Intron (ENST00000368357.7/135112, intron 3 of 16)	6	125797856	125818858	21003	2	104355145	ENST00000429007.1	-12937	ENSG00000232131	NCOA7-AS1	NCOA7 antisense RNA 1
chr1	156081931	156083272	1342	2.29051	3.20595	0.952148	0.329176	Promoter (<=1kb)	1	156082573	156134487	51915	1	4000	ENST00000502751.5	0	ENSG00000160789	LMNA	lamin A/C
chr3	18789250	18790638	1389	2.28764	2.78552	1.00616	0.315828	Intron (ENST00000626982.2/101927777, intron 4 of 4)	3	18745744	18747491	1748	1	105376976	ENST00000453361.1	43506	NA	LOC105376976	uncharacterized LOC105376976
chr10	11742052	11743077	1026	2.28698	2.55312	1.06522	0.302031	Promoter (<=1kb)	10	11742366	11764070	21705	1	79746	ENST00000496136.5	0	ENSG00000134463	ECHDC3	enoyl-CoA hydratase domain containing 3
chr2	108988462	108989345	884	2.28605	1.76809	1.263	0.261088	Promoter (<=1kb)	2	108894471	108989220	94750	2	10913	ENST00000258443.7	0	ENSG00000135960	EDAR	ectodysplasin A receptor
chr20	58851933	58852864	932	2.28593	1.11905	1.54133	0.214423	Promoter (<=1kb)	20	58852714	58900410	47697	1	2778	ENST00000481768.6	0	ENSG00000087460	GNAS	GNAS complex locus
chr16	2140511	2141012	502	2.28455	1.58674	1.3268	0.249378	Promoter (<=1kb)	16	2140803	2153070	12268	1	25837	ENST00000565592.5	0	ENSG00000167964	RAB26	RAB26, member RAS oncogene family
chr12	778858	779943	1086	2.28201	1.16801	1.51158	0.218902	Intron (ENST00000315939.11/65125, intron 1 of 27)	12	753056	827501	74446	1	65125	ENST00000447667.2	25802	ENSG00000060237	WNK1	WNK lysine deficient protein kinase 1
chr16	700288	701241	954	2.27709	1.77321	1.2579	0.262052	Intron (ENST00000397621.6/146330, intron 1 of 5)	16	692927	696025	3099	2	146330	ENST00000562563.1	-4263	ENSG00000127585	FBXL16	F-box and leucine rich repeat protein 16
chr4	109302183	109303249	1067	2.2744	1.60105	1.30706	0.252932	Promoter (<=1kb)	4	109303035	109316135	13101	1	645078	ENST00000500526.1	0	ENSG00000246774	COL25A1-DT	COL25A1 divergent transcript
chr14	50104267	50105614	1348	2.27413	1.92056	1.2098	0.271375	Promoter (<=1kb)	14	50039145	50105043	65899	2	196913	ENST00000603228.2	0	NA	LINC01599	long intergenic non-protein coding RNA 1599
chr19	52896900	52898214	1315	2.27404	3.74857	0.878526	0.348609	Promoter (<=1kb)	19	52860851	52897693	36843	2	162967	ENST00000673631.1	0	ENSG00000182986	ZNF320	zinc finger protein 320
chr19	49552984	49557127	4144	2.27228	4.85215	0.789838	0.374152	Promoter (<=1kb)	19	49555718	49557295	1578	2	51070	ENST00000596477.1	168	ENSG00000142546	NOSIP	nitric oxide synthase interacting protein
chr17	6831184	6832283	1100	2.27069	2.45489	1.07181	0.300541	Promoter (<=1kb)	17	6797993	6831729	33737	2	83659	ENST00000338694.7	0	ENSG00000167858	TEKT1	tektin 1
chr13	73702193	73703200	1008	2.26994	3.75859	0.874611	0.349685	Intron (ENST00000377669.7/11278, intron 7 of 7)	13	73545348	73661891	116544	2	100874156	ENST00000648624.1	-40302	NA	LINC00393	long intergenic non-protein coding RNA 393
chr12	6376494	6377469	976	2.26798	1.43411	1.35424	0.244543	Promoter (<=1kb)	12	6347684	6377359	29676	2	6337	ENST00000543768.1	0	ENSG00000111319	SCNN1A	sodium channel epithelial 1 subunit alpha
chr16	87713126	87714143	1018	2.26794	1.90874	1.20344	0.27264	Promoter (2-3kb)	16	87707816	87710877	3062	2	54758	ENST00000569487.1	-2249	ENSG00000104731	KLHDC4	kelch domain containing 4
chr1	28591687	28592652	966	2.26301	1.33572	1.40116	0.236534	Promoter (<=1kb)	1	28592200	28595443	3244	1	115273	ENST00000373826.3	0	ENSG00000188060	RAB42	RAB42, member RAS oncogene family
chr19	58154599	58155593	995	2.26194	4.05226	0.845379	0.357866	Promoter (<=1kb)	19	58126335	58155110	28776	2	79673	ENST00000500161.2	0	ENSG00000181894	ZNF329	zinc finger protein 329
chr11	62923271	62924469	1199	2.26103	1.52019	1.32188	0.250258	Promoter (1-2kb)	11	62909738	62921807	12070	2	1128	ENST00000543973.1	-1464	ENSG00000168539	CHRM1	cholinergic receptor muscarinic 1
chr10	68827008	68827756	749	2.2597	2.14959	1.13443	0.286835	Promoter (<=1kb)	10	68827531	68893060	65530	1	219736	ENST00000298596.11	0	ENSG00000165730	STOX1	storkhead box 1
chr7	38433674	38434371	698	2.25709	2.12315	1.13073	0.287623	Intron (ENST00000356264.7/273, intron 12 of 20)	7	38394070	38430055	35986	2	273	ENST00000462072.1	-3619	ENSG00000078053	AMPH	amphiphysin
chr20	51409736	51410899	1164	2.25582	1.12566	1.52096	0.217478	Intron (ENST00000396009.7/4773, intron 9 of 9)	20	51391409	51399219	7811	2	4773	ENST00000496054.1	-10517	ENSG00000101096	NFATC2	nuclear factor of activated T cells 2
chr19	44024749	44025896	1148	2.25523	1.78217	1.23053	0.267307	Promoter (<=1kb)	19	44023118	44025233	2116	2	105372414	ENST00000653695.1	0	ENSG00000267144	ZNF222-DT	ZNF222 divergent transcript
chr7	4739069	4739928	860	2.25469	1.39703	1.32682	0.249375	Promoter (<=1kb)	7	4740859	4755051	14193	1	221937	ENST00000460979.2	-931	ENSG00000164916	FOXK1	forkhead box K1
chr10	23343729	23344850	1122	2.25187	1.66551	1.27123	0.25954	Promoter (<=1kb)	10	23343957	23345181	1225	1	105376453	ENST00000443224.1	0	ENSG00000224215	C10orf67-AS1	C10orf67 antisense RNA 1
chr2	196259845	196261072	1228	2.25087	2.67652	1.01227	0.314362	Promoter (<=1kb)	2	196260024	196263559	3536	1	101927482	ENST00000430904.1	0	ENSG00000229056	HECW2-AS1	HECW2 antisense RNA 1
chr1	107785797	107787400	1604	2.2504	4.22978	0.824225	0.363951	Promoter (<=1kb)	1	107573169	107785624	212456	2	10451	ENST00000343258.8	-173	ENSG00000134215	VAV3	vav guanine nucleotide exchange factor 3
chr1	120941941	120943013	1073	2.24981	3.76906	0.860418	0.353625	Promoter (<=1kb)	1	120942600	120942763	164	1	101954264	ENST00000612985.1	0	ENSG00000277610	RNVU1-4	RNA, variant U1 small nuclear 4
chr2	2646233	2647356	1124	2.24815	2.70567	0.978511	0.32257	Intron (ENST00000655823.1/ENST00000655823.1, intron 2 of 2)	2	2641989	2656630	14642	2	107985839	ENST00000414065.1	9274	NA	LOC107985839	uncharacterized LOC107985839
chr16	57284161	57285160	1000	2.24781	2.3239	1.08177	0.298305	Promoter (<=1kb)	16	57249039	57284661	35623	2	51090	ENST00000613167.4	0	ENSG00000102934	PLLP	plasmolipin
chr11	128548550	128549086	537	2.24754	1.51111	1.30014	0.254192	Intron (ENST00000392668.8/2113, intron 3 of 9)	11	128526142	128530389	4248	1	101929517	ENST00000525706.1	22408	ENSG00000254588	ETS1-AS1	ETS1 antisense RNA 1
chr17	44829337	44830622	1286	2.24646	1.41155	1.34426	0.246288	Promoter (<=1kb)	17	44798448	44830287	31840	2	10052	ENST00000592524.6	0	ENSG00000182963	GJC1	gap junction protein gamma 1
chr16	58500422	58501784	1363	2.24513	2.06468	1.129	0.287992	Promoter (<=1kb)	16	58501468	58504636	3169	1	65009	ENST00000566656.5	0	ENSG00000103034	NDRG4	NDRG family member 4
chr1	185256798	185257886	1089	2.24405	1.91421	1.17322	0.278745	Intron (ENST00000367501.7/54823, intron 16 of 18)	1	185300097	185300918	822	2	10625	ENST00000468217.1	43032	ENSG00000116679	IVNS1ABP	influenza virus NS1A binding protein
chr10	70221231	70222462	1232	2.24344	1.45571	1.33424	0.248055	Intron (ENST00000373232.8/5464, intron 2 of 10)	10	70218445	70230379	11935	2	5464	ENST00000460755.1	7917	ENSG00000180817	PPA1	inorganic pyrophosphatase 1
chr12	2783513	2784627	1115	2.24266	1.80526	1.20965	0.271404	Intron (ENST00000636122.1/283440, intron 2 of 5)	12	2761200	2775658	14459	2	283440	ENST00000637160.1	-7855	ENSG00000256150	ITFG2-AS1	ITFG2 antisense RNA 1
chr21	29436175	29437131	957	2.24141	1.68698	1.25168	0.263236	Intron (ENST00000422809.5/571, intron 2 of 4)	21	29496047	29500386	4340	1	54147	ENST00000429843.1	-58916	ENSG00000234293	BACH1-IT3	BACH1 intronic transcript 3
chr16	81769785	81771546	1762	2.24141	1.21261	1.45795	0.22726	Intron (ENST00000565054.5/5336, intron 2 of 5)	16	81779291	81962685	183395	1	5336	ENST00000564138.6	-7745	ENSG00000197943	PLCG2	phospholipase C gamma 2
chr14	103390911	103391596	686	2.22972	1.76098	1.21309	0.270724	Promoter (2-3kb)	14	103393762	103503820	110059	1	4140	ENST00000678091.1	-2166	ENSG00000075413	MARK3	microtubule affinity regulating kinase 3
chr2	68515059	68516728	1670	2.22961	2.52816	1.01277	0.314244	Intron (ENST00000529851.5/200558, intron 4 of 8)	2	68529638	68630724	101087	1	200558	ENST00000471727.3	-12910	ENSG00000169621	APLF	aprataxin and PNKP like factor
chr19	48744974	48745797	824	2.22786	1.12918	1.46983	0.225377	Promoter (<=1kb)	19	48740908	48745859	4952	2	284359	ENST00000595517.5	62	ENSG00000182264	IZUMO1	izumo sperm-egg fusion 1
chr17	78412516	78413734	1219	2.22771	2.98723	0.938891	0.332566	Intron (ENST00000589425.5/9489, intron 6 of 8)	17	78420222	78425114	4893	1	9489	ENST00000586880.1	-6488	ENSG00000087157	PGS1	phosphatidylglycerophosphate synthase 1
chr15	57591419	57592244	826	2.22763	1.28696	1.38196	0.239771	Promoter (<=1kb)	15	57591904	57685364	93461	1	100820829	ENST00000267853.10	0	ENSG00000263155	MYZAP	myocardial zonula adherens protein
chr17	49993457	49993947	491	2.22738	1.31231	1.3673	0.242279	Promoter (<=1kb)	17	49991335	49993703	2369	2	1747	ENST00000512495.2	0	ENSG00000064195	DLX3	distal-less homeobox 3
chr14	100105416	100107017	1602	2.22658	3.38554	0.882077	0.347636	Promoter (2-3kb)	14	100109419	100109514	96	2	100616247	ENST00000584249.1	2497	ENSG00000265154	MIR151B	microRNA 151b
chr7	100826847	100828683	1837	2.22575	1.01842	1.51398	0.218536	Promoter (<=1kb)	7	100802565	100827115	24551	2	2050	ENST00000360620.7	0	ENSG00000196411	EPHB4	EPH receptor B4
chr7	158587772	158588629	858	2.22532	1.14592	1.43415	0.231091	Promoter (<=1kb)	7	157539056	158587773	1048718	2	5799	ENST00000389413.7	0	ENSG00000155093	PTPRN2	protein tyrosine phosphatase receptor type N2
chr17	50084651	50085435	785	2.22372	1.1729	1.40351	0.236141	Promoter (<=1kb)	17	50086329	50090481	4153	1	3675	ENST00000506437.1	-894	ENSG00000005884	ITGA3	integrin subunit alpha 3
chr8	24955039	24956749	1711	2.21923	1.91978	1.15703	0.282087	Promoter (<=1kb)	8	24950955	24956612	5658	2	4747	ENST00000610854.2	0	ENSG00000277586	NEFL	neurofilament light chain
chr17	77355648	77357317	1670	2.21853	2.38521	1.03653	0.308633	Intron (ENST00000589070.1/10801, intron 1 of 1)	17	77373190	77500594	127405	1	10801	ENST00000423034.6	-15873	ENSG00000184640	SEPTIN9	septin 9
chr19	50325486	50325950	465	2.21734	1.7817	1.19404	0.27452	Intron (ENST00000376959.6/3748, intron 1 of 4)	19	50311937	50329246	17310	2	3748	ENST00000376959.6	3296	ENSG00000131398	KCNC3	potassium voltage-gated channel subfamily C member 3
chr1	21659041	21659903	863	2.21705	2.62173	0.991567	0.319363	Intron (ENST00000290101.8/5909, intron 1 of 26)	1	21617932	21653307	35376	2	5909	ENST00000447293.5	-5734	ENSG00000076864	RAP1GAP	RAP1 GTPase activating protein
chr1	6962039	6963742	1704	2.21645	2.41434	1.02561	0.311195	Intron (ENST00000303635.12/23261, intron 3 of 22)	1	6874056	6887842	13787	1	23261	ENST00000467267.1	87983	ENSG00000171735	CAMTA1	calmodulin binding transcription activator 1
chr6	73514929	73516331	1403	2.21217	4.46245	0.780375	0.377029	Promoter (2-3kb)	6	73517519	73518811	1293	2	1915	ENST00000679031.1	2480	ENSG00000156508	EEF1A1	eukaryotic translation elongation factor 1 alpha 1
chr6	146543200	146544336	1137	2.21082	1.44362	1.29666	0.254828	Promoter (<=1kb)	6	146543833	146554953	11121	1	10981	ENST00000367495.4	0	ENSG00000118508	RAB32	RAB32, member RAS oncogene family
chr6	96836722	96838208	1487	2.2085	3.63026	0.845341	0.357877	Promoter (<=1kb)	6	96794125	96837477	43353	2	81491	ENST00000229955.4	0	ENSG00000112218	GPR63	G protein-coupled receptor 63
chr11	1832244	1833077	834	2.20804	1.07477	1.47413	0.2247	Promoter (<=1kb)	11	1833792	1837521	3730	1	90019	ENST00000490707.5	-715	ENSG00000149043	SYT8	synaptotagmin 8
chr19	1568313	1569155	843	2.20695	2.26283	1.06095	0.303003	Promoter (<=1kb)	19	1554672	1568325	13654	2	399664	ENST00000402693.5	0	ENSG00000181588	MEX3D	mex-3 RNA binding family member D
chr3	138347637	138348791	1155	2.20449	1.01087	1.49838	0.220924	Promoter (<=1kb)	3	138347648	138405534	57887	1	22808	ENST00000614350.4	0	ENSG00000158186	MRAS	muscle RAS oncogene homolog
chr1	35181509	35182836	1328	2.20409	2.18472	1.06915	0.30114	Promoter (<=1kb)	1	35176380	35181606	5227	2	6421	ENST00000485365.1	0	ENSG00000116560	SFPQ	splicing factor proline and glutamine rich
chr17	32494683	32495640	958	2.20309	1.2256	1.37173	0.241518	Promoter (1-2kb)	17	32494453	32497073	2621	2	4642	ENST00000577576.1	1433	ENSG00000176658	MYO1D	myosin ID
chr14	54870302	54871134	833	2.20154	1.33969	1.3126	0.251928	Intron (ENST00000395514.5/2643, intron 1 of 6)	14	54878113	54878193	81	2	100422984	ENST00000580634.1	7059	ENSG00000265432	MIR4308	microRNA 4308
chr1	151006445	151006867	423	2.20085	2.22723	1.0609	0.303013	Promoter (<=1kb)	1	150996549	151006857	10309	2	55793	ENST00000312210.9	0	ENSG00000143409	MINDY1	MINDY lysine 48 deubiquitinase 1
chr5	142348959	142350961	2003	2.20056	1.72643	1.19071	0.275189	Promoter (2-3kb)	5	142353543	142375654	22112	1	101926941	ENST00000514303.1	-2582	ENSG00000231185	SPRY4-AS1	SPRY4 antisense RNA 1
chr7	80133961	80135742	1782	2.19983	2.19828	1.03965	0.307907	Promoter (<=1kb)	7	80134377	80219354	84978	1	2770	ENST00000351004.8	0	ENSG00000127955	GNAI1	G protein subunit alpha i1
chr22	42553105	42554396	1292	2.19972	3.82645	0.820912	0.364917	Promoter (<=1kb)	22	42553617	42558412	4796	1	253190	ENST00000447870.6	0	ENSG00000183569	SERHL2	serine hydrolase like 2
chr18	79506275	79507853	1579	2.19867	2.59487	0.976696	0.323019	Intron (ENST00000253506.9/4772, intron 9 of 9)	18	79493396	79527665	34270	1	4772	ENST00000590861.1	12879	ENSG00000131196	NFATC1	nuclear factor of activated T cells 1
chr19	21081848	21082745	898	2.19555	3.40702	0.853178	0.355658	Promoter (<=1kb)	19	21082159	21117215	35057	1	148206	ENST00000616183.1	0	ENSG00000160352	ZNF714	zinc finger protein 714
chr17	45277025	45278202	1178	2.19476	1.32956	1.32934	0.248926	Intron (ENST00000344686.8/9020, intron 6 of 15)	17	45263135	45273966	10832	2	9020	ENST00000592267.1	-3059	ENSG00000006062	MAP3K14	mitogen-activated protein kinase kinase kinase 14
chr10	72109292	72110067	776	2.19476	1.09109	1.45597	0.227576	Intron (ENST00000394919.5/51008, intron 9 of 9)	10	72088357	72089032	676	2	9806	ENST00000483699.1	-20260	ENSG00000107742	SPOCK2	SPARC (osteonectin), cwcv and kazal like domains proteoglycan 2
chr6	25006136	25007710	1575	2.19282	2.54946	0.988951	0.320002	Intron (ENST00000510784.8/9750, intron 1 of 13)	6	24839359	25042018	202660	2	9750	ENST00000510784.8	34308	ENSG00000111913	RIPOR2	RHO family interacting cell polarization regulator 2
chr3	185927771	185929840	2070	2.19234	3.03908	0.902186	0.342199	Promoter (<=1kb)	3	185916744	185929073	12330	2	6434	ENST00000492417.5	0	ENSG00000136527	TRA2B	transformer 2 beta homolog
chr19	48975793	48976442	650	2.19183	1.24808	1.36174	0.243239	Promoter (1-2kb)	19	48970750	48977986	7237	2	2997	ENST00000472004.5	1544	ENSG00000104812	GYS1	glycogen synthase 1
chr1	156705284	156706963	1680	2.19168	4.11448	0.792589	0.373321	Promoter (<=1kb)	1	156699606	156705583	5978	2	1382	ENST00000368222.8	0	ENSG00000143320	CRABP2	cellular retinoic acid binding protein 2
chr5	56100371	56101016	646	2.19069	1.02387	1.44103	0.229976	Intron (ENST00000645512.1/105378976, intron 2 of 3)	5	56099882	56116951	17070	2	79722	ENST00000434982.2	15935	ENSG00000164512	ANKRD55	ankyrin repeat domain 55
chr4	108080695	108081727	1033	2.1902	2.14975	1.05474	0.304422	Promoter (1-2kb)	4	108048169	108083413	35245	2	51176	ENST00000505379.5	1686	ENSG00000138795	LEF1	lymphoid enhancer binding factor 1
chr19	33795424	33797970	2547	2.19012	2.83985	0.93385	0.333868	Promoter (<=1kb)	19	33795933	33806958	11026	1	79047	ENST00000587658.5	0	ENSG00000153885	KCTD15	potassium channel tetramerization domain containing 15
chr17	1203022	1203904	883	2.18989	2.04132	1.09748	0.294824	Intron (ENST00000574139.7/29, intron 1 of 22)	17	1003527	1187322	183796	2	29	ENST00000544583.6	-15700	ENSG00000159842	ABR	ABR activator of RhoGEF and GTPase
chr19	48881086	48881926	841	2.18894	2.59643	0.968727	0.325001	Promoter (<=1kb)	19	48880971	48882125	1155	2	7288	ENST00000522341.1	199	ENSG00000104804	TULP2	TUB like protein 2
chr15	65638322	65639360	1039	2.18876	1.43187	1.28715	0.256578	Intron (ENST00000434116.6/9187, intron 3 of 7)	15	65642905	65654191	11287	1	9187	ENST00000449142.2	-3545	ENSG00000074621	SLC24A1	solute carrier family 24 member 1
chr1	8510003	8510805	803	2.18652	1.59948	1.20467	0.272394	Intron (ENST00000337907.7/473, intron 8 of 23)	1	8352406	8525939	173534	2	473	ENST00000377464.5	15134	ENSG00000142599	RERE	arginine-glutamic acid dipeptide repeats
chr19	55086292	55087645	1354	2.18652	1.49106	1.24447	0.264615	Promoter (<=1kb)	19	55086777	55087920	1144	1	54869	ENST00000587901.1	0	ENSG00000131037	EPS8L1	EPS8 like 1
chr8	406422	407291	870	2.18564	3.74058	0.818189	0.365713	Promoter (<=1kb)	8	406428	435700	29273	1	26260	ENST00000518240.5	0	ENSG00000147364	FBXO25	F-box protein 25
chr3	195147460	195148587	1128	2.18443	1.32032	1.31021	0.25236	Promoter (<=1kb)	3	195147871	195152790	4920	1	101410543	ENST00000447975.1	0	ENSG00000230266	XXYLT1-AS2	XXYLT1 antisense RNA 2
chr7	100365587	100366080	494	2.18443	1.18178	1.37838	0.240382	Promoter (1-2kb)	7	100367530	100399302	31773	1	29992	ENST00000432297.6	-1450	ENSG00000085514	PILRA	paired immunoglobin like type 2 receptor alpha
chr19	17067232	17067918	687	2.18443	1.15362	1.39365	0.237793	Intron (ENST00000253669.10/93323, intron 3 of 10)	19	17055831	17060242	4412	2	93323	ENST00000595958.1	-6990	ENSG00000131351	HAUS8	HAUS augmin like complex subunit 8
chr20	36943843	36945032	1190	2.18384	3.21532	0.87273	0.350203	Promoter (2-3kb)	20	36930799	36947059	16261	2	25939	ENST00000644370.1	2027	ENSG00000101347	SAMHD1	SAM and HD domain containing deoxynucleoside triphosphate triphosphohydrolase 1
chr14	21256924	21257973	1050	2.18226	1.83772	1.14355	0.284907	Intron (ENST00000336053.10/3183, intron 1 of 6)	14	21210966	21262677	51712	2	3183	ENST00000556897.5	4704	ENSG00000092199	HNRNPC	heterogeneous nuclear ribonucleoprotein C
chr9	132901485	132902435	951	2.17961	1.54656	1.22595	0.2682	Promoter (<=1kb)	9	132891392	132901958	10567	2	7248	ENST00000644786.1	0	ENSG00000165699	TSC1	TSC complex subunit 1
chr3	42159479	42160470	992	2.17961	1.20318	1.37549	0.240875	Promoter (<=1kb)	3	42160169	42212623	52455	1	22906	ENST00000341421.7	0	ENSG00000182606	TRAK1	trafficking kinesin protein 1
chr7	5776882	5777352	471	2.17812	1.40273	1.28938	0.256167	Promoter (2-3kb)	7	5761088	5780292	19205	2	54476	ENST00000476345.1	2940	ENSG00000011275	RNF216	ring finger protein 216
chr11	11857576	11858162	587	2.1777	1.13424	1.40938	0.235163	Intron (ENST00000339865.9/55031, intron 1 of 26)	11	11842066	11959323	117258	1	55031	ENST00000399455.2	15510	ENSG00000170242	USP47	ubiquitin specific peptidase 47
chr7	158863128	158864541	1414	2.17557	2.63155	0.956053	0.328186	Intron (ENST00000407559.8/55112, intron 1 of 24)	7	158869446	158871499	2054	1	55112	ENST00000397143.3	-4905	ENSG00000126870	DYNC2I1	dynein 2 intermediate chain 1
chr1	154441098	154442015	918	2.17388	1.24154	1.3233	0.250005	Intron (ENST00000344086.8/3570, intron 6 of 8)	1	154435010	154465314	30305	1	3570	ENST00000507256.1	6088	ENSG00000160712	IL6R	interleukin 6 receptor
chr22	17120208	17121211	1004	2.17326	1.60068	1.20511	0.272305	Promoter (<=1kb)	22	17116297	17121360	5064	2	27439	ENST00000331437.4	149	ENSG00000183307	TMEM121B	transmembrane protein 121B
chr19	3366217	3367324	1108	2.17326	1.56221	1.21898	0.269564	Promoter (<=1kb)	19	3366549	3462967	96419	1	4782	ENST00000341919.7	0	ENSG00000141905	NFIC	nuclear factor I C
chr22	43142738	43143869	1132	2.17315	3.5009	0.833696	0.361209	Promoter (<=1kb)	22	43132209	43143398	11190	2	27349	ENST00000290429.11	0	ENSG00000100294	MCAT	malonyl-CoA-acyl carrier protein transacylase
chr17	77434716	77435965	1250	2.17312	2.74919	0.926262	0.335839	Intron (ENST00000591198.5/10801, intron 2 of 10)	17	77426956	77488273	61318	1	10801	ENST00000586521.5	7760	ENSG00000184640	SEPTIN9	septin 9
chr9	89454939	89457681	2743	2.17269	3.9294	0.794204	0.372835	Promoter (<=1kb)	9	89360791	89455953	95163	2	10507	ENST00000420987.5	0	ENSG00000187764	SEMA4D	semaphorin 4D
chr8	38465485	38468906	3422	2.16974	4.10511	0.779408	0.377325	Promoter (<=1kb)	8	38400215	38467707	67493	2	2260	ENST00000649678.1	0	ENSG00000077782	FGFR1	fibroblast growth factor receptor 1
chr19	40217795	40218534	740	2.16951	1.47504	1.24584	0.264351	Promoter (<=1kb)	19	40216058	40218399	2342	2	148014	ENST00000311308.6	0	ENSG00000174521	TTC9B	tetratricopeptide repeat domain 9B
chr1	43530746	43531764	1019	2.16856	1.31081	1.30109	0.254018	Promoter (<=1kb)	1	43530876	43579285	48410	1	5792	ENST00000617451.4	0	ENSG00000142949	PTPRF	protein tyrosine phosphatase receptor type F
chr19	56507461	56508457	997	2.16729	3.84513	0.794982	0.372601	Promoter (<=1kb)	19	56507850	56530221	22372	1	57573	ENST00000591537.5	0	ENSG00000196263	ZNF471	zinc finger protein 471
chr22	46773771	46775120	1350	2.16677	2.34911	1.00598	0.31587	Promoter (<=1kb)	22	46773927	47174092	400166	1	25771	ENST00000406733.1	0	ENSG00000054611	TBC1D22A	TBC1 domain family member 22A
chr4	108071097	108073134	2038	2.16575	3.50571	0.825618	0.363546	Promoter (<=1kb)	4	108047592	108071778	24187	2	51176	ENST00000504426.5	0	ENSG00000138795	LEF1	lymphoid enhancer binding factor 1
chr12	122412212	122413368	1157	2.16528	1.06731	1.43737	0.230569	Intron (ENST00000361654.8/6249, intron 1 of 23)	12	122271434	122422569	151136	2	6249	ENST00000358808.6	9201	ENSG00000130779	CLIP1	CAP-Gly domain containing linker protein 1
chr7	5687945	5689985	2041	2.16445	2.46516	0.978531	0.322565	Intron (ENST00000389902.8/54476, intron 13 of 16)	7	5662432	5680461	18030	2	100874342	ENST00000443837.1	-7484	ENSG00000237738	RNF216-IT1	RNF216 intronic transcript 1
chr3	52892436	52893508	1073	2.16341	3.35795	0.84228	0.358748	Intron (ENST00000504329.1/100526772, intron 1 of 9)	3	52852621	52897543	44923	2	100526772	ENST00000467979.1	4035	ENSG00000248592	STIMATE-MUSTN1	STIMATE-MUSTN1 readthrough
chr2	64227995	64229163	1169	2.16294	1.58305	1.19532	0.274262	Promoter (<=1kb)	2	64228401	64252609	24209	1	100507006	ENST00000413030.7	0	NA	LOC100507006	uncharacterized LOC100507006
chr19	57487303	57488278	976	2.16282	3.43087	0.833239	0.36134	Promoter (<=1kb)	19	57487718	57517559	29842	1	374928	ENST00000601674.6	0	ENSG00000152439	ZNF773	zinc finger protein 773
chr4	15777931	15779738	1808	2.16278	3.14067	0.867038	0.35178	Promoter (<=1kb)	4	15778275	15849255	70981	1	952	ENST00000502843.5	0	ENSG00000004468	CD38	CD38 molecule
chr20	13008928	13010382	1455	2.16277	1.55315	1.19451	0.274425	Promoter (<=1kb)	20	13008972	13169103	160132	1	55304	ENST00000399002.7	0	ENSG00000172296	SPTLC3	serine palmitoyltransferase long chain base subunit 3
chr5	175871533	175872518	986	2.16277	1.09843	1.39867	0.23695	Promoter (<=1kb)	5	175871578	175879826	8249	1	10814	ENST00000512824.5	0	ENSG00000145920	CPLX2	complexin 2
chr14	98138105	98139352	1248	2.16174	2.4485	0.977352	0.322856	Promoter (2-3kb)	14	98136074	98139242	3169	1	105370652	ENST00000557072.1	2031	NA	LINC02295	long intergenic non-protein coding RNA 2295
chr9	92133789	92134444	656	2.16104	1.54987	1.21164	0.271011	Promoter (1-2kb)	9	92132398	92138629	6232	1	100128076	ENST00000412768.1	1391	NA	LOC100128076	protein tyrosine phosphatase pseudogene
chr19	4708954	4710023	1070	2.16104	1.47164	1.2411	0.265263	Intron (ENST00000594671.5/91039, intron 1 of 18)	19	4675764	4714220	38457	2	91039	ENST00000597145.5	4197	ENSG00000142002	DPP9	dipeptidyl peptidase 9
chr11	3580592	3581551	960	2.15968	1.95608	1.08905	0.296685	Promoter (<=1kb)	11	3481520	3581211	99692	2	101927708	ENST00000527970.1	0	ENSG00000255367	LOC101927708	uncharacterized LOC101927708
chr12	111323275	111325524	2250	2.15717	3.2827	0.844123	0.358223	Intron (ENST00000261726.11/23316, intron 18 of 21)	12	111304142	111304209	68	1	102465455	ENST00000617342.1	19133	ENSG00000273700	MIR6760	microRNA 6760
chr15	84761318	84762400	1083	2.15666	1.25961	1.32576	0.249565	Intron (ENST00000560079.7/9640, intron 1 of 10)	15	84748592	84806445	57854	1	9640	ENST00000560079.7	12726	ENSG00000166716	ZNF592	zinc finger protein 592
chr19	47107431	47107998	568	2.15558	2.53986	0.959705	0.327264	Intron (ENST00000253048.10/23211, intron 2 of 14)	19	47064859	47112229	47371	2	23211	ENST00000594019.5	4231	ENSG00000130749	ZC3H4	zinc finger CCCH-type containing 4
chr19	16182386	16182939	554	2.15548	2.16886	1.03904	0.308049	Promoter (2-3kb)	19	16185380	16191614	6235	1	26017	ENST00000589852.5	-2441	ENSG00000105058	FAM32A	family with sequence similarity 32 member A
chr19	57888409	57889470	1062	2.15531	2.67247	0.926447	0.335791	Promoter (<=1kb)	19	57850315	57888920	38606	2	730051	ENST00000596604.5	0	ENSG00000204514	ZNF814	zinc finger protein 814
chr2	174699812	174700595	784	2.15488	1.19763	1.34414	0.246309	Intron (ENST00000442996.1/ENST00000442996.1, intron 2 of 3)	2	174676337	174682916	6580	2	7456	ENST00000487291.1	-16896	ENSG00000115935	WIPF1	WAS/WASL interacting protein family member 1
chr5	140261270	140262184	915	2.15426	1.20915	1.34679	0.245843	Intron (ENST00000504227.5/84418, intron 3 of 3)	5	140245347	140281535	36189	2	5201	ENST00000512707.1	19351	ENSG00000113068	PFDN1	prefoldin subunit 1
chr2	105802485	105803628	1144	2.15334	3.0644	0.869617	0.351064	Intron (ENST00000233154.9/8440, intron 1 of 4)	2	105816558	105893176	76619	1	8440	ENST00000522586.5	-12930	ENSG00000071051	NCK2	NCK adaptor protein 2
chr5	141411975	141413739	1765	2.15327	2.07902	1.05526	0.304302	Promoter (<=1kb)	5	141412987	141417448	4462	1	56106	ENST00000612503.1	0	ENSG00000253846	PCDHGA10	protocadherin gamma subfamily A, 10
chr11	94768041	94769387	1347	2.15177	1.40296	1.24535	0.264445	Promoter (<=1kb)	11	94768342	94876748	108407	1	154810	ENST00000317829.12	0	ENSG00000166025	AMOTL1	angiomotin like 1
chr14	69772483	69774823	2341	2.1498	4.31894	0.749504	0.386636	Promoter (1-2kb)	14	69770881	69771915	1035	1	6430	ENST00000554929.1	1602	ENSG00000100650	SRSF5	serine and arginine rich splicing factor 5
chr17	61403115	61404437	1323	2.14939	2.04682	1.053	0.304819	Promoter (2-3kb)	17	61400365	61409124	8760	1	6909	ENST00000477081.1	2750	ENSG00000121068	TBX2	T-box transcription factor 2
chr12	53984777	53986236	1460	2.14939	1.87987	1.09711	0.294905	Promoter (<=1kb)	12	53983951	53985519	1569	2	100874365	ENST00000514702.1	0	ENSG00000251151	HOXC-AS3	HOXC cluster antisense RNA 3
chr8	145051310	145052930	1621	2.14915	4.15353	0.762432	0.382571	Promoter (<=1kb)	8	145052465	145054438	1974	1	65265	ENST00000524395.5	0	ENSG00000182307	C8orf33	chromosome 8 open reading frame 33
chr16	1003464	1004702	1239	2.14609	1.51662	1.20178	0.27297	Promoter (2-3kb)	16	991151	1000926	9776	2	107984898	ENST00000599946.2	-2538	NA	LOC107984898	uncharacterized LOC107984898
chr19	51689848	51691192	1345	2.14542	2.7715	0.906768	0.340976	Promoter (<=1kb)	19	51689128	51694555	5428	1	147650	ENST00000646845.1	720	ENSG00000182310	SPACA6	sperm acrosome associated 6
chr14	100099118	100099878	761	2.14475	1.40513	1.23301	0.266825	Promoter (2-3kb)	14	100096947	100135968	39022	1	51466	ENST00000557384.5	2171	ENSG00000196405	EVL	Enah/Vasp-like
chr10	74265621	74266615	995	2.14475	1.03856	1.4134	0.234496	Intron (ENST00000672429.1/132, intron 3 of 9)	10	74314733	74708549	393817	1	132	ENST00000672604.1	-48118	ENSG00000156110	ADK	adenosine kinase
chr11	61752131	61753089	959	2.14318	1.71439	1.14175	0.285286	Promoter (<=1kb)	11	61752636	61788518	35883	1	745	ENST00000278836.10	0	ENSG00000124920	MYRF	myelin regulatory factor
chr5	132819582	132820921	1340	2.14318	1.60597	1.17638	0.278098	Promoter (2-3kb)	5	132823283	132823805	523	2	134549	ENST00000488072.1	2884	ENSG00000164403	SHROOM1	shroom family member 1
chr17	80474720	80476603	1884	2.1427	2.50608	0.953572	0.328815	Promoter (<=1kb)	17	80471903	80475812	3910	2	4884	ENST00000571100.1	0	ENSG00000171246	NPTX1	neuronal pentraxin 1
chr22	49656758	49658102	1345	2.14214	3.69154	0.794168	0.372846	Promoter (<=1kb)	22	49414524	49657504	242981	2	348645	ENST00000414287.5	0	ENSG00000188511	MIR3667HG	MIR3667 host gene
chr1	41366411	41366900	490	2.14172	1.67415	1.14816	0.283937	Intron (ENST00000372591.1/100132074, intron 1 of 1)	1	41361931	41382678	20748	1	100132074	ENST00000641094.1	4480	ENSG00000281518	FOXO6	forkhead box O6
chr17	43832476	43833863	1388	2.14143	2.36169	0.978613	0.322545	Promoter (<=1kb)	17	43800811	43833146	32336	2	4356	ENST00000398389.9	0	ENSG00000161647	MPP3	membrane palmitoylated protein 3
chr19	53881411	53882521	1111	2.1405	3.2785	0.832696	0.361497	Promoter (<=1kb)	19	53881784	53891827	10044	1	5582	ENST00000474397.5	0	ENSG00000126583	PRKCG	protein kinase C gamma
chr3	42653869	42655308	1440	2.13901	2.14669	1.02699	0.310869	Promoter (<=1kb)	3	42601963	42654388	52426	2	101928323	ENST00000438017.5	0	NA	ZBTB47-AS1	ZBTB47 and NKTR antisense RNA 1
chr2	240819435	240821461	2027	2.13605	1.60116	1.15744	0.282001	Promoter (<=1kb)	2	240713761	240820372	106612	2	547	ENST00000649096.1	0	ENSG00000130294	KIF1A	kinesin family member 1A
chr3	12796343	12797229	887	2.13579	1.82189	1.09628	0.295087	Promoter (<=1kb)	3	12796472	12834802	38331	1	23066	ENST00000295989.9	0	ENSG00000144712	CAND2	cullin associated and neddylation dissociated 2 (putative)
chr5	179612135	179613987	1853	2.13505	3.5756	0.795133	0.372555	Promoter (2-3kb)	5	179614524	179616287	1764	2	3187	ENST00000524179.1	2300	ENSG00000169045	HNRNPH1	heterogeneous nuclear ribonucleoprotein H1
chr1	109687341	109688464	1124	2.13503	3.31878	0.827329	0.363049	Promoter (<=1kb)	1	109687814	109709039	21226	1	2944	ENST00000490021.2	0	ENSG00000134184	GSTM1	glutathione S-transferase mu 1
chr17	78745228	78745941	714	2.13335	2.1933	1.01134	0.314586	Intron (ENST00000591455.5/9267, intron 1 of 12)	17	78708912	78736967	28056	2	9267	ENST00000591095.1	-8261	ENSG00000108669	CYTH1	cytohesin 1
chr11	396363	397622	1260	2.13325	2.20582	1.0068	0.315673	Promoter (<=1kb)	11	397372	397776	405	1	11187	ENST00000524646.1	0	ENSG00000184363	PKP3	plakophilin 3
chr12	55996070	55997774	1705	2.13313	2.10714	1.02833	0.310555	Promoter (<=1kb)	12	55997180	56005525	8346	1	6821	ENST00000356124.8	0	ENSG00000139531	SUOX	sulfite oxidase
chr1	1692403	1694163	1761	2.13235	4.80274	0.705761	0.400857	Promoter (<=1kb)	1	1659529	1692724	33196	2	728661	ENST00000614300.4	0	ENSG00000189339	SLC35E2B	solute carrier family 35 member E2B
chr7	50781302	50782996	1695	2.13217	1.72751	1.11297	0.291441	Promoter (<=1kb)	7	50590068	50782896	192829	2	2887	ENST00000401949.6	0	ENSG00000106070	GRB10	growth factor receptor bound protein 10
chr7	4753491	4754316	826	2.13217	1.33772	1.25072	0.263418	Intron (ENST00000328914.5/221937, intron 2 of 8)	7	4758009	4760029	2021	1	221937	ENST00000496023.1	-3693	ENSG00000164916	FOXK1	forkhead box K1
chr19	10142416	10143933	1518	2.13171	3.09146	0.849952	0.356569	Promoter (<=1kb)	19	10140030	10143901	3872	2	1786	ENST00000589538.5	0	ENSG00000130816	DNMT1	DNA methyltransferase 1
chr1	44842422	44843597	1176	2.13164	1.07046	1.37095	0.241652	Promoter (<=1kb)	1	44819844	44842944	23101	2	8643	ENST00000447098.6	0	ENSG00000117425	PTCH2	patched 2
chr16	90022264	90023079	816	2.13146	1.9766	1.06257	0.302634	Promoter (<=1kb)	16	90022600	90044971	22372	1	2622	ENST00000620723.4	0	ENSG00000141013	GAS8	growth arrest specific 8
chr9	137302193	137302987	795	2.12955	3.42385	0.810802	0.367886	Promoter (<=1kb)	9	137299631	137302271	2641	2	441478	ENST00000356628.4	0	ENSG00000198435	NRARP	NOTCH regulated ankyrin repeat protein
chr12	49346823	49347835	1013	2.12856	2.97983	0.860155	0.353698	Promoter (<=1kb)	12	49346888	49353690	6803	1	79962	ENST00000549441.7	0	ENSG00000178401	DNAJC22	DnaJ heat shock protein family (Hsp40) member C22
chr3	71488573	71489729	1157	2.12761	3.06263	0.851109	0.356242	Intron (ENST00000649528.3/27086, intron 3 of 20)	3	70959237	71493564	534328	2	27086	ENST00000648380.1	3835	ENSG00000114861	FOXP1	forkhead box P1
chr17	38890450	38892066	1617	2.12736	2.64469	0.914199	0.339006	Promoter (<=1kb)	17	38890234	38915129	24896	1	3927	ENST00000581485.1	216	ENSG00000002834	LASP1	LIM and SH3 protein 1
chr19	52922816	52924328	1513	2.1255	4.06529	0.753048	0.385516	Promoter (<=1kb)	19	52904417	52923481	19065	2	388559	ENST00000638862.1	0	ENSG00000213793	ZNF888	zinc finger protein 888
chr1	167483868	167484401	534	2.1253	1.90293	1.06091	0.30301	Intron (ENST00000362089.10/919, intron 1 of 7)	1	167455195	167458646	3452	1	101928512	ENST00000660512.1	28673	NA	LOC101928512	uncharacterized LOC101928512
chr16	86563334	86564584	1251	2.12309	2.29948	0.979193	0.322401	Promoter (2-3kb)	16	86566829	86569728	2900	1	2303	ENST00000649859.1	-2245	ENSG00000176692	FOXC2	forkhead box C2
chr9	36008313	36009577	1265	2.12191	1.75777	1.11106	0.291855	Intron (ENST00000647905.1/ENST00000647905.1, intron 2 of 2)	9	36036913	36124455	87543	1	8434	ENST00000377966.4	-27336	ENSG00000122707	RECK	reversion inducing cysteine rich protein with kazal motifs
chr17	63710176	63710789	614	2.12128	1.39465	1.21894	0.269572	Promoter (<=1kb)	17	63706661	63710943	4283	2	92335	ENST00000638578.1	154	ENSG00000266173	STRADA	STE20 related adaptor alpha
chr19	52007598	52008748	1151	2.12105	4.05247	0.751518	0.385999	Promoter (<=1kb)	19	51991332	52008081	16750	2	284370	ENST00000602063.5	0	ENSG00000197619	ZNF615	zinc finger protein 615
chr1	1723855	1724894	1040	2.12075	5.19701	0.675351	0.411195	Promoter (<=1kb)	1	1702379	1724357	21979	2	728642	ENST00000404249.8	0	ENSG00000008128	CDK11A	cyclin dependent kinase 11A
chr4	6664136	6665622	1487	2.11992	2.16087	1.00657	0.31573	Promoter (<=1kb)	4	6663396	6676755	13360	1	93622	ENST00000645429.1	740	ENSG00000170846	LOC93622	Morf4 family associated protein 1 like 1 pseudogene
chr13	71864657	71867155	2499	2.11844	2.27448	0.95913	0.327409	Promoter (<=1kb)	13	71439946	71866769	426824	2	1602	ENST00000619232.1	0	ENSG00000276644	DACH1	dachshund family transcription factor 1
chr8	80091348	80092238	891	2.11586	1.09995	1.3575	0.243976	Intron (ENST00000379096.9/7163, intron 1 of 5)	8	80034872	80080831	45960	2	7163	ENST00000448733.3	-10517	ENSG00000076554	TPD52	tumor protein D52
chr10	103854587	103855973	1387	2.11501	1.62119	1.1389	0.285888	Promoter (<=1kb)	10	103594027	103855543	261517	2	9644	ENST00000369774.8	0	ENSG00000107957	SH3PXD2A	SH3 and PX domains 2A
chr17	58658131	58659775	1645	2.11419	5.38821	0.660578	0.416358	Intron (ENST00000349033.10/56155, intron 1 of 31)	17	58660424	58692018	31595	2	56155	ENST00000583666.2	32243	ENSG00000121101	TEX14	testis expressed 14, intercellular bridge forming factor
chr11	128469896	128470545	650	2.11316	2.7957	0.87862	0.348583	Intron (ENST00000535549.5/2113, intron 2 of 3)	11	128462544	128463950	1407	2	2113	ENST00000530924.2	-5946	ENSG00000134954	ETS1	ETS proto-oncogene 1, transcription factor
chr12	807122	808230	1109	2.11106	1.66486	1.12371	0.289124	Intron (ENST00000315939.11/65125, intron 1 of 27)	12	829925	861135	31211	1	65125	ENST00000540360.5	-21695	ENSG00000060237	WNK1	WNK lysine deficient protein kinase 1
chr20	2983631	2984709	1079	2.11106	1.06886	1.37869	0.240328	Intron (ENST00000455631.5/5786, intron 3 of 6)	20	3043622	3045747	2126	1	2797	ENST00000245983.6	-58913	ENSG00000125787	GNRH2	gonadotropin releasing hormone 2
chr21	36112734	36114642	1909	2.11092	4.54449	0.710737	0.399202	Intron (ENST00000535199.5/100133286, intron 1 of 3)	21	36104881	36109690	4810	1	105369306	ENST00000422473.1	7853	ENSG00000233393	LOC105369306	uncharacterized LOC105369306
chr15	90665218	90666103	886	2.10784	2.19247	0.988266	0.32017	Intron (ENST00000559531.1/101926895, intron 2 of 3)	15	90660739	90664686	3948	1	101929765	ENST00000559473.1	4479	ENSG00000245479	LINC01585	long intergenic non-protein coding RNA 1585
chr1	22018851	22019508	658	2.10775	1.89184	1.05908	0.303428	Intron (ENST00000650360.1/10136, intron 7 of 8)	1	22024558	22031223	6666	1	29092	ENST00000635675.2	-5050	ENSG00000218510	LINC00339	long intergenic non-protein coding RNA 339
chr3	71056956	71058104	1149	2.10751	1.53886	1.15714	0.282062	Intron (ENST00000649528.3/27086, intron 7 of 20)	3	70959211	71064095	104885	2	27086	ENST00000650402.1	5991	ENSG00000114861	FOXP1	forkhead box P1
chr18	13381798	13383238	1441	2.10651	3.5761	0.78008	0.377119	Promoter (<=1kb)	18	13382554	13621271	238718	1	753	ENST00000586222.2	0	ENSG00000168675	LDLRAD4	low density lipoprotein receptor class A domain containing 4
chr19	43639616	43640653	1038	2.10603	2.50834	0.923177	0.336645	Promoter (<=1kb)	19	43622368	43639850	17483	2	199731	ENST00000222374.3	0	ENSG00000105767	CADM4	cell adhesion molecule 4
chr8	100944226	100944963	738	2.10531	2.30866	0.959914	0.327212	Intron (ENST00000395958.6/7534, intron 2 of 5)	8	100919829	100948162	28334	2	7534	ENST00000522542.5	3199	ENSG00000164924	YWHAZ	tyrosine 3-monooxygenase/tryptophan 5-monooxygenase activation protein zeta
chr1	227318002	227319240	1239	2.10269	1.39937	1.19711	0.273904	Promoter (<=1kb)	1	226989865	227318474	328610	2	8476	ENST00000366769.7	0	ENSG00000143776	CDC42BPA	CDC42 binding protein kinase alpha
chr7	6615068	6616156	1089	2.10269	1.39056	1.20051	0.273223	Promoter (<=1kb)	7	6615610	6624290	8681	1	54753	ENST00000457543.4	0	ENSG00000236609	ZNF853	zinc finger protein 853
chr6	90186732	90188098	1367	2.10162	2.01472	1.02085	0.312321	Intron (ENST00000257749.9/60468, intron 4 of 8)	6	90089054	90218245	129192	2	60468	ENST00000493201.5	30147	ENSG00000112182	BACH2	BTB domain and CNC homolog 2
chr20	25750718	25751944	1227	2.10093	2.77765	0.873619	0.349958	Promoter (<=1kb)	20	25751040	25752765	1726	1	105372582	ENST00000660589.1	0	NA	LOC105372582	uncharacterized LOC105372582
chr1	160400240	160401737	1498	2.10042	1.0929	1.31734	0.251073	Promoter (<=1kb)	1	160400564	160428670	28107	1	57216	ENST00000368061.3	0	ENSG00000162738	VANGL2	VANGL planar cell polarity protein 2
chr20	31967940	31969131	1192	2.0992	2.02883	1.01658	0.313335	Promoter (<=1kb)	20	31968151	32003387	35237	1	343702	ENST00000562532.3	0	ENSG00000260903	XKR7	XK related 7
chr3	138946337	138947513	1177	2.09833	2.15513	0.984368	0.321126	Promoter (<=1kb)	3	138947217	138953990	6774	1	401089	ENST00000383165.4	0	ENSG00000206262	FOXL2NB	FOXL2 neighbor
chr1	16154706	16155934	1229	2.09833	2.01116	1.01823	0.312942	Promoter (<=1kb)	1	16155211	16157329	2119	1	101927479	ENST00000424774.1	0	NA	EPHA2-AS1	EPHA2 antisense RNA 1
chr12	4293327	4294358	1032	2.09762	1.73373	1.07895	0.298937	Intron (ENST00000676411.1/894, intron 5 of 5)	12	4307763	4354549	46787	1	57103	ENST00000635110.1	-13405	ENSG00000078237	TIGAR	TP53 induced glycolysis regulatory phosphatase
chr16	2919222	2920263	1042	2.09762	1.1816	1.28573	0.256841	Intron (ENST00000253928.14/84256, intron 2 of 9)	16	2914261	2922651	8391	1	84256	ENST00000570759.1	4961	ENSG00000059122	FLYWCH1	FLYWCH-type zinc finger 1
chr16	11714373	11715371	999	2.09762	1.1643	1.29448	0.255228	Intron (ENST00000356957.7/51061, intron 5 of 12)	16	11692050	11733999	41950	2	51061	ENST00000571882.1	18628	ENSG00000153066	TXNDC11	thioredoxin domain containing 11
chr13	48410047	48410693	647	2.09607	1.54647	1.1518	0.283175	Promoter (2-3kb)	13	48411138	48413113	1976	2	10161	ENST00000620633.5	2420	ENSG00000139679	LPAR6	lysophosphatidic acid receptor 6
chr22	42519194	42520322	1129	2.09545	4.07903	0.732879	0.391954	Promoter (<=1kb)	22	42508344	42519796	11453	2	27341	ENST00000323013.7	0	ENSG00000189306	RRP7A	ribosomal RNA processing 7 homolog A
chr17	39224880	39226069	1190	2.09431	1.56052	1.13279	0.287185	Promoter (<=1kb)	17	39210541	39225945	15405	2	342667	ENST00000333461.6	0	ENSG00000141750	STAC2	SH3 and cysteine rich domain 2
chr19	17448133	17448890	758	2.09431	1.05803	1.35391	0.2446	Promoter (<=1kb)	19	17435509	17448668	13160	2	100130519	ENST00000341130.6	0	ENSG00000188051	TMEM221	transmembrane protein 221
chr7	43594144	43595434	1291	2.09341	1.45063	1.17807	0.277752	Intron (ENST00000462448.1/9263, intron 1 of 3)	7	43583108	43627379	44272	1	9263	ENST00000319357.6	11036	ENSG00000164543	STK17A	serine/threonine kinase 17a
chr8	97774965	97776556	1592	2.09301	4.76482	0.684804	0.40794	Promoter (<=1kb)	8	97775057	97852598	77542	1	55353	ENST00000619747.1	0	ENSG00000104341	LAPTM4B	lysosomal protein transmembrane 4 beta
chr1	25799837	25800638	802	2.09279	2.0013	1.0166	0.313331	Promoter (<=1kb)	1	25800193	25818221	18029	1	57190	ENST00000361547.7	0	ENSG00000162430	SELENON	selenoprotein N
chr11	117105534	117106575	1042	2.09279	1.97783	1.02242	0.31195	Intron (ENST00000442124.1/ENST00000442124.1, intron 2 of 2)	11	116845593	117098437	252845	2	23387	ENST00000446921.6	-7097	ENSG00000160584	SIK3	SIK family kinase 3
chr21	45981124	45982545	1422	2.09217	2.87708	0.850614	0.356382	Promoter (<=1kb)	21	45981770	46005048	23279	1	1291	ENST00000361866.8	0	ENSG00000142156	COL6A1	collagen type VI alpha 1 chain
chr14	21240836	21241787	952	2.09214	1.19439	1.27112	0.25956	Intron (ENST00000336053.10/3183, intron 1 of 6)	14	21210556	21234245	23690	2	3183	ENST00000449098.5	-6591	ENSG00000092199	HNRNPC	heterogeneous nuclear ribonucleoprotein C
chr7	44145494	44146750	1257	2.09097	3.74126	0.752347	0.385737	Promoter (<=1kb)	7	44143772	44145939	2168	2	2645	ENST00000672743.1	0	ENSG00000106633	GCK	glucokinase
chr17	7717400	7718439	1040	2.08927	1.39468	1.18602	0.276136	Promoter (<=1kb)	17	7717761	7743901	26141	1	146754	ENST00000570791.5	0	ENSG00000183914	DNAH2	dynein axonemal heavy chain 2
chr7	140902327	140903139	813	2.08919	1.56213	1.11403	0.291211	Intron (ENST00000496384.7/673, intron 1 of 18)	7	140808892	140924703	115812	2	673	ENST00000642808.1	21564	ENSG00000157764	BRAF	B-Raf proto-oncogene, serine/threonine kinase
chr2	219441194	219442559	1366	2.08739	2.11719	0.981924	0.321727	Promoter (<=1kb)	2	219441516	219448171	6656	1	10290	ENST00000435853.5	0	ENSG00000072195	SPEG	striated muscle enriched protein kinase
chr17	2749443	2750664	1222	2.08693	1.42293	1.17665	0.278043	Promoter (<=1kb)	17	2724411	2749504	25094	2	101928991	ENST00000575506.3	0	NA	CCDC92B	coiled-coil domain containing 92B
chr15	100571516	100573076	1561	2.08693	1.26659	1.24093	0.265295	Promoter (<=1kb)	15	100569235	100573562	4328	2	55180	ENST00000559169.1	486	ENSG00000140471	LINS1	lines homolog 1
chr5	1593951	1594922	972	2.08578	2.92169	0.839118	0.359652	Promoter (<=1kb)	5	1567495	1594476	26982	2	728609	ENST00000652578.1	0	NA	SDHAP3	SDHA pseudogene 3
chr9	79544228	79544995	768	2.08202	1.15864	1.20994	0.271347	Intron (ENST00000670754.1/102723932, intron 1 of 2)	9	79515643	79532342	16700	2	102723932	ENST00000413352.3	-11886	ENSG00000233086	LNCARSR	lncRNA regulator of Akt signaling associated with HCC and RCC
chr15	63510358	63511086	729	2.08195	1.26065	1.23675	0.266102	Intron (ENST00000540797.5/9960, intron 1 of 13)	15	63515446	63556742	41297	1	9960	ENST00000559771.5	-4360	ENSG00000140455	USP3	ubiquitin specific peptidase 3
chr7	151050678	151051498	821	2.07801	1.2717	1.22127	0.269116	Promoter (<=1kb)	7	151050920	151052754	1835	1	9311	ENST00000485929.5	0	ENSG00000213199	ASIC3	acid sensing ion channel subunit 3
chr14	62116905	62117885	981	2.07801	1.23383	1.23831	0.2658	Promoter (<=1kb)	14	62117346	62128397	11052	1	646113	ENST00000637212.1	0	NA	LINC00643	long intergenic non-protein coding RNA 643
chr19	48878899	48879392	494	2.07789	3.03338	0.815371	0.36654	Promoter (2-3kb)	19	48880971	48882125	1155	2	7288	ENST00000522341.1	2733	ENSG00000104804	TULP2	TUB like protein 2
chr8	13132485	13133762	1278	2.07787	3.51383	0.762968	0.382404	Promoter (<=1kb)	8	13085189	13133474	48286	2	10395	ENST00000358919.6	0	ENSG00000164741	DLC1	DLC1 Rho GTPase activating protein
chr14	102774686	102775343	658	2.0775	3.39482	0.776628	0.378177	Promoter (2-3kb)	14	102777449	102911500	134052	1	7187	ENST00000392745.8	-2106	ENSG00000131323	TRAF3	TNF receptor associated factor 3
chr3	71309012	71309870	859	2.07399	1.01396	1.32692	0.249357	Promoter (2-3kb)	3	71052603	71306053	253451	2	27086	ENST00000610810.5	-2959	ENSG00000114861	FOXP1	forkhead box P1
chr20	56399771	56400772	1002	2.07373	1.46152	1.15499	0.28251	Intron (ENST00000217109.9/1477, intron 5 of 5)	20	56392695	56399161	6467	1	1477	ENST00000490539.1	7076	ENSG00000101138	CSTF1	cleavage stimulation factor subunit 1
chr9	126611353	126612471	1119	2.07304	1.98126	1.00261	0.316684	Promoter (<=1kb)	9	126608113	126612519	4407	2	105376277	ENST00000432418.1	48	NA	LMX1B-DT	LMX1B divergent transcript
chr16	74600019	74601907	1889	2.073	3.30939	0.781147	0.376793	Intron (ENST00000205061.9/2734, intron 1 of 26)	16	74503736	74607097	103362	2	2734	ENST00000565260.1	5190	ENSG00000090863	GLG1	golgi glycoprotein 1
chr15	78859929	78861272	1344	2.0729	2.98405	0.820552	0.365022	Intron (ENST00000379535.8/10933, intron 2 of 12)	15	78872814	78898133	25320	1	10933	ENST00000331268.9	-11542	ENSG00000185787	MORF4L1	mortality factor 4 like 1
chr9	129866478	129867333	856	2.07203	3.30331	0.780469	0.377	Promoter (<=1kb)	9	129868322	129878437	10116	1	10868	ENST00000474895.6	-989	ENSG00000136878	USP20	ubiquitin specific peptidase 20
chr18	79399358	79401588	2231	2.07033	4.52821	0.686609	0.407323	Promoter (<=1kb)	18	79400274	79529323	129050	1	4772	ENST00000545796.5	0	ENSG00000131196	NFATC1	nuclear factor of activated T cells 1
chr17	42405965	42406662	698	2.07027	1.26729	1.22204	0.268964	Intron (ENST00000357037.6/284119, intron 1 of 1)	17	42402449	42423256	20808	2	284119	ENST00000357037.6	16594	ENSG00000177469	CAVIN1	caveolae associated protein 1
chr4	142558746	142560395	1650	2.07027	1.06392	1.32452	0.249785	Promoter (<=1kb)	4	142086179	142560669	474491	2	8821	ENST00000510812.5	274	ENSG00000109452	INPP4B	inositol polyphosphate-4-phosphatase type II B
chr19	37505968	37507236	1269	2.06891	4.68823	0.675243	0.411232	Promoter (<=1kb)	19	37497159	37506624	9466	2	101927720	ENST00000588845.2	0	ENSG00000266916	ZNF793-AS1	ZNF793 antisense RNA 1 (head to head)
chr17	48413049	48414391	1343	2.0689	1.79405	1.04697	0.30621	Intron (ENST00000336915.11/8631, intron 1 of 12)	17	48133442	48430214	296773	2	8631	ENST00000336915.11	15823	ENSG00000141293	SKAP1	src kinase associated phosphoprotein 1
chr3	30666763	30667603	841	2.06856	2.25257	0.937872	0.332829	Intron (ENST00000295754.10/7048, intron 3 of 6)	3	30673973	30693820	19848	1	7048	ENST00000673203.1	-6370	ENSG00000163513	TGFBR2	transforming growth factor beta receptor 2
chr14	99178812	99179617	806	2.06565	1.51281	1.0741	0.300023	Intron (ENST00000345514.2/64919, intron 2 of 2)	14	99169287	99271485	102199	2	64919	ENST00000345514.2	91868	ENSG00000127152	BCL11B	BAF chromatin remodeling complex subunit BCL11B
chr11	117822972	117824000	1029	2.06486	1.55869	1.09649	0.295041	Promoter (<=1kb)	11	117820560	117824740	4181	2	486	ENST00000533281.1	740	ENSG00000137731	FXYD2	FXYD domain containing ion transport regulator 2
chr2	38725631	38726369	739	2.06469	1.72518	1.05438	0.304503	Intron (ENST00000272252.10/130589, intron 4 of 6)	2	38744895	38747044	2150	2	6432	ENST00000477635.5	20675	ENSG00000115875	SRSF7	serine and arginine rich splicing factor 7
chr1	156435264	156436410	1147	2.06469	1.54769	1.10827	0.292461	Intron (ENST00000673141.1/10485, intron 2 of 8)	1	156425637	156430701	5065	2	10485	ENST00000469813.1	-4563	ENSG00000125462	MIR9-1HG	MIR9-1 host gene
chr19	58538166	58538992	827	2.06463	1.73453	1.05452	0.304472	Promoter (<=1kb)	19	58517309	58538911	21603	2	84878	ENST00000600130.1	0	ENSG00000119574	ZBTB45	zinc finger and BTB domain containing 45
chr1	23637022	23637849	828	2.06453	1.79433	1.04216	0.307323	Intron (ENST00000477916.5/259283, intron 5 of 6)	1	23627334	23640568	13235	1	259283	ENST00000374555.7	9688	ENSG00000197880	MDS2	myelodysplastic syndrome 2 translocation associated
chr19	11581093	11582176	1084	2.06453	1.59357	1.10076	0.294104	Promoter (2-3kb)	19	11577160	11579008	1849	2	54	ENST00000591319.1	-2085	ENSG00000102575	ACP5	acid phosphatase 5, tartrate resistant
chr7	5592267	5593546	1280	2.06134	3.46094	0.759321	0.383544	Promoter (<=1kb)	7	5592816	5606655	13840	1	6624	ENST00000382361.8	0	ENSG00000075618	FSCN1	fascin actin-bundling protein 1
chr19	8002033	8002786	754	2.06106	2.09816	0.969154	0.324894	Promoter (<=1kb)	19	7963159	8002203	39045	2	1994	ENST00000596459.5	0	ENSG00000066044	ELAVL1	ELAV like RNA binding protein 1
chr18	46333242	46334640	1399	2.06048	1.69462	1.06925	0.301117	Promoter (<=1kb)	18	46333968	46337647	3680	1	494470	ENST00000587853.1	0	ENSG00000141622	RNF165	ring finger protein 165
chr5	39186066	39188602	2537	2.06006	4.56236	0.677619	0.41041	Intron (ENST00000351578.12/2533, intron 2 of 17)	5	39107284	39203027	95744	2	2533	ENST00000515010.5	14425	ENSG00000082074	FYB1	FYN binding protein 1
chr15	90248816	90250010	1195	2.0596	1.58722	1.09492	0.295387	Promoter (<=1kb)	15	90249530	90259088	9559	1	440307	ENST00000339615.9	0	ENSG00000213471	TTLL13P	tubulin tyrosine ligase like 13, pseudogene
chr16	88941451	88942390	940	2.05872	1.56945	1.09392	0.295609	Promoter (<=1kb)	16	88881112	88941809	60698	2	863	ENST00000569464.5	0	ENSG00000129993	CBFA2T3	CBFA2/RUNX1 partner transcriptional co-repressor 3
chr11	73964056	73965064	1009	2.05853	2.1886	0.948659	0.330064	Promoter (<=1kb)	11	73964828	73970230	5403	1	374407	ENST00000537753.5	0	ENSG00000187726	DNAJB13	DnaJ heat shock protein family (Hsp40) member B13
chr4	89836621	89838182	1562	2.05825	2.39297	0.905006	0.341446	Promoter (<=1kb)	4	89700345	89837310	136966	2	6622	ENST00000673902.1	0	ENSG00000145335	SNCA	synuclein alpha
chr4	76305035	76307252	2218	2.05783	3.31145	0.771932	0.379623	Promoter (<=1kb)	4	76306733	76311130	4398	1	8987	ENST00000237642.7	0	ENSG00000118804	STBD1	starch binding domain 1
chr20	36930227	36931515	1289	2.05642	3.82995	0.725097	0.39448	Promoter (<=1kb)	20	36916531	36931049	14519	2	25939	ENST00000643161.1	0	ENSG00000101347	SAMHD1	SAM and HD domain containing deoxynucleoside triphosphate triphosphohydrolase 1
chr19	12484192	12485342	1151	2.05619	3.29781	0.771091	0.379882	Promoter (<=1kb)	19	12433103	12484816	51714	2	163051	ENST00000598753.1	0	ENSG00000242852	ZNF709	zinc finger protein 709
chr1	19179712	19180334	623	2.05523	1.37589	1.1326	0.287225	Promoter (1-2kb)	1	19150924	19177745	26822	2	23352	ENST00000419533.1	-1967	ENSG00000127481	UBR4	ubiquitin protein ligase E3 component n-recognin 4
chr10	132185333	132187499	2167	2.05465	2.75952	0.839272	0.359608	Promoter (<=1kb)	10	132184074	132185962	1889	2	105378567	ENST00000443922.1	0	NA	JAKMIP3-AS1	JAKMIP3 antisense RNA 1
chr19	12994751	12995561	811	2.05432	1.51408	1.11315	0.291402	Promoter (<=1kb)	19	12995475	13098796	103322	1	4784	ENST00000592199.6	0	ENSG00000008441	NFIX	nuclear factor I X
chr3	183018560	183019485	926	2.05349	1.62415	1.03851	0.308172	Intron (ENST00000265594.9/56922, intron 17 of 18)	3	183015289	183022717	7429	2	56922	ENST00000464601.5	3232	ENSG00000078070	MCCC1	methylcrotonyl-CoA carboxylase subunit 1
chr22	40275980	40277050	1071	2.05339	1.67448	1.07013	0.300919	Promoter (<=1kb)	22	40276840	40300498	23659	1	23112	ENST00000497559.1	0	ENSG00000100354	TNRC6B	trinucleotide repeat containing adaptor 6B
chr2	176187533	176189102	1570	2.05232	1.10651	1.27505	0.258826	Promoter (<=1kb)	2	176188843	176188901	59	1	102465802	ENST00000610524.1	0	ENSG00000283880	MIR7704	microRNA 7704
chr7	158695871	158696887	1017	2.051	1.40787	1.15171	0.283194	Promoter (<=1kb)	7	158693412	158696651	3240	2	54892	ENST00000621338.1	0	ENSG00000146918	NCAPG2	non-SMC condensin II complex subunit G2
chr13	113816606	113817309	704	2.04995	1.65592	1.06536	0.301998	Promoter (<=1kb)	13	113815630	113845744	30115	1	650669	ENST00000458001.2	976	NA	GAS6-AS1	GAS6 antisense RNA 1
chr4	47031390	47033029	1640	2.04976	2.12984	0.954287	0.328634	Promoter (<=1kb)	4	47031551	47043345	11795	1	2560	ENST00000509366.5	0	ENSG00000163288	GABRB1	gamma-aminobutyric acid type A receptor subunit beta1
chr20	57381505	57382939	1435	2.0487	1.42234	1.13877	0.285915	Intron (ENST00000670533.1/100291105, intron 1 of 2)	20	57391396	57409333	17938	1	55544	ENST00000356208.10	-8457	ENSG00000132819	RBM38	RNA binding motif protein 38
chr22	45413209	45414357	1149	2.04862	2.70578	0.843766	0.358325	Promoter (<=1kb)	22	45413693	45432509	18817	1	26150	ENST00000614167.2	0	ENSG00000128408	RIBC2	RIB43A domain with coiled-coils 2
chr19	36837496	36838685	1190	2.04831	4.85488	0.652469	0.419234	Promoter (<=1kb)	19	36817428	36838387	20960	2	388536	ENST00000356725.9	0	ENSG00000197863	ZNF790	zinc finger protein 790
chr5	55977640	55978706	1067	2.04823	2.59693	0.858185	0.35425	Promoter (<=1kb)	5	55978248	56111329	133082	1	105378976	ENST00000645512.1	0	NA	LOC105378976	uncharacterized LOC105378976
chr22	45172519	45173722	1204	2.04811	2.7954	0.827788	0.362916	Promoter (1-2kb)	22	45171050	45178430	7381	1	10762	ENST00000486184.1	1469	ENSG00000093000	NUP50	nucleoporin 50
chr17	78714904	78715798	895	2.04707	1.25941	1.17639	0.278096	Promoter (1-2kb)	17	78674048	78717025	42978	2	9267	ENST00000585509.5	1227	ENSG00000108669	CYTH1	cytohesin 1
chr6	118705967	118706416	450	2.04634	1.8204	1.02282	0.311854	Intron (ENST00000368488.9/387119, intron 1 of 13)	6	118491431	118710068	218638	2	387119	ENST00000392500.7	3652	ENSG00000111860	CEP85L	centrosomal protein 85 like
chr19	57477028	57478074	1047	2.04631	3.30272	0.762506	0.382548	Promoter (<=1kb)	19	57437970	57477503	39534	2	400720	ENST00000596831.1	0	ENSG00000197128	ZNF772	zinc finger protein 772
chr16	106794	107805	1012	2.04543	1.06117	1.2897	0.256106	Intron (ENST00000622194.4/8131, intron 5 of 11)	16	92791	98160	5370	2	8131	ENST00000464069.1	-8634	ENSG00000103148	NPRL3	NPR3 like, GATOR1 complex subunit
chr22	39940476	39941220	745	2.04451	2.26994	0.909989	0.34012	Intron (ENST00000344138.9/9402, intron 1 of 7)	22	39946817	39971105	24289	1	9402	ENST00000407075.3	-5597	ENSG00000100351	GRAP2	GRB2 related adaptor protein 2
chr19	17403262	17403736	475	2.04392	2.0142	0.969583	0.324787	Promoter (<=1kb)	19	17403241	17404537	1297	2	684	ENST00000533098.5	801	ENSG00000130303	BST2	bone marrow stromal cell antigen 2
chr2	224038307	224040135	1829	2.04386	3.37145	0.754532	0.385048	Promoter (<=1kb)	2	223975045	224039286	64242	2	5270	ENST00000258405.9	0	ENSG00000135919	SERPINE2	serpin family E member 2
chr19	38229546	38230155	610	2.04319	1.33135	1.15475	0.282561	Promoter (<=1kb)	19	38211009	38229677	18669	2	8193	ENST00000412732.5	0	ENSG00000011332	DPF1	double PHD fingers 1
chr14	72476568	72477662	1095	2.04245	1.33238	1.17253	0.278885	Promoter (2-3kb)	14	72473987	72477260	3274	1	9628	ENST00000554734.1	2581	ENSG00000182732	RGS6	regulator of G protein signaling 6
chr19	3554397	3554794	398	2.04212	2.899	0.806446	0.369176	Promoter (2-3kb)	19	3544199	3557563	13365	2	126321	ENST00000588918.5	2769	ENSG00000161091	MFSD12	major facilitator superfamily domain containing 12
chr1	42944452	42945783	1332	2.04212	2.15857	0.939995	0.332282	Promoter (1-2kb)	1	42926796	42943238	16443	2	6513	ENST00000475162.3	-1214	ENSG00000117394	SLC2A1	solute carrier family 2 member 1
chr17	65041576	65042806	1231	2.0393	2.47419	0.87733	0.348937	Intron (ENST00000439174.7/10672, intron 2 of 3)	17	65013788	65055774	41987	2	10672	ENST00000541118.1	12968	ENSG00000120063	GNA13	G protein subunit alpha 13
chr2	127640074	127640872	799	2.03874	1.72609	1.03294	0.309472	Promoter (<=1kb)	2	127638426	127640403	1978	2	55679	ENST00000494613.5	0	ENSG00000072163	LIMS2	LIM zinc finger domain containing 2
chr19	37691874	37692604	731	2.03728	2.49828	0.870477	0.350826	Promoter (<=1kb)	19	37647813	37692337	44525	2	163115	ENST00000587199.5	0	ENSG00000196381	ZNF781	zinc finger protein 781
chr5	175796582	175797518	937	2.0368	2.68635	0.835848	0.36059	Promoter (<=1kb)	5	175796628	175837848	41221	1	10814	ENST00000506642.5	0	ENSG00000145920	CPLX2	complexin 2
chr10	22648753	22649806	1054	2.03667	2.2997	0.909239	0.340319	Intron (ENST00000376573.9/5305, intron 1 of 9)	10	22607818	22609717	1900	2	5305	ENST00000432610.1	-39036	ENSG00000150867	PIP4K2A	phosphatidylinositol-5-phosphate 4-kinase type 2 alpha
chr10	129963580	129964367	788	2.03661	1.25673	1.16293	0.280863	Promoter (<=1kb)	10	129835233	129964274	129042	2	253738	ENST00000440978.2	0	ENSG00000108001	EBF3	EBF transcription factor 3
chr19	2775307	2776492	1186	2.03625	1.6577	1.05645	0.30403	Intron (ENST00000221566.7/6449, intron 1 of 11)	19	2767582	2770781	3200	2	6449	ENST00000587866.1	-4526	ENSG00000104969	SGTA	small glutamine rich tetratricopeptide repeat co-chaperone alpha
chr19	58228265	58229444	1180	2.03491	2.215	0.923871	0.336464	Promoter (<=1kb)	19	58228914	58315183	86270	1	108903150	ENST00000637233.1	0	ENSG00000267216	ZNF8-ERVK3-1	ZNF8-ERVK3-1 readthrough
chr1	25622494	25622955	462	2.03472	1.41216	1.11383	0.291255	Intron (ENST00000374332.9/57134, intron 1 of 11)	1	25617850	25784450	166601	1	57134	ENST00000263979.7	4644	ENSG00000117643	MAN1C1	mannosidase alpha class 1C member 1
chr17	76063492	76064674	1183	2.03348	1.11681	1.24763	0.264009	Promoter (<=1kb)	17	76061150	76064127	2978	2	6730	ENST00000587864.1	0	ENSG00000167881	SRP68	signal recognition particle 68
chr1	205593437	205593837	401	2.0326	1.90047	0.980748	0.322017	Promoter (1-2kb)	1	205592129	205598141	6013	1	148808	ENST00000471425.1	1308	ENSG00000174514	MFSD4A	major facilitator superfamily domain containing 4A
chr16	89761001	89762047	1047	2.03242	2.46106	0.874261	0.349781	Promoter (2-3kb)	16	89748764	89764947	16184	2	2175	ENST00000563510.5	2900	ENSG00000187741	FANCA	FA complementation group A
chr19	6160610	6161817	1208	2.03239	3.38986	0.745183	0.388008	Promoter (<=1kb)	19	6161480	6193091	31612	1	81616	ENST00000591741.5	0	ENSG00000130377	ACSBG2	acyl-CoA synthetase bubblegum family member 2
chr15	78810549	78812046	1498	2.03144	2.11445	0.93616	0.33327	Promoter (<=1kb)	15	78759206	78811464	52259	2	11173	ENST00000388820.5	0	ENSG00000136378	ADAMTS7	ADAM metallopeptidase with thrombospondin type 1 motif 7
chr10	14559695	14562400	2706	2.03052	3.22335	0.761304	0.382924	Intron (ENST00000181796.7/83641, intron 2 of 4)	10	14521137	14556414	35278	2	83641	ENST00000492700.5	-3281	ENSG00000065809	FAM107B	family with sequence similarity 107 member B
chr6	139175313	139176274	962	2.02994	1.40429	1.11529	0.290937	Intron (ENST00000367658.3/51696, intron 3 of 3)	6	139135080	139180802	45723	1	51696	ENST00000367658.3	40233	ENSG00000112406	HECA	hdc homolog, cell cycle regulator					1.58496
chr9	135887286	135888305	1020	2.02904	2.0995	0.935908	0.333335	Intron (ENST00000389532.9/157922, intron 1 of 16)	9	135809581	135882897	73317	2	157922	ENST00000312405.10	-4389	ENSG00000130559	CAMSAP1	calmodulin regulated spectrin associated protein 1
chr10	102612215	102613537	1323	2.02837	3.0442	0.77869	0.377545	Intron (ENST00000369902.8/51684, intron 8 of 11)	10	102590809	102599543	8735	1	51684	ENST00000471000.1	21406	ENSG00000107882	SUFU	SUFU negative regulator of hedgehog signaling
chr6	42009202	42010772	1571	2.02639	1.95635	0.967131	0.3254	Intron (ENST00000616010.4/896, intron 2 of 4)	6	41936855	42048676	111822	2	896	ENST00000505672.5	37904	ENSG00000112576	CCND3	cyclin D3
chr19	56671170	56672075	906	2.02607	1.74442	1.01423	0.313894	Promoter (<=1kb)	19	56671982	56799632	127651	1	101929059	ENST00000595954.2	0	ENSG00000286125	ZIM2-AS1	ZIM2 antisense RNA 1
chr12	49388729	49389564	836	2.02607	1.03321	1.28831	0.256363	Promoter (<=1kb)	12	49389516	49390162	647	1	100335030	ENST00000551907.1	0	NA	LOC100335030	FGFR1 oncogene partner 2 pseudogene
chr7	100168056	100169559	1504	2.02562	3.07291	0.774344	0.378879	Promoter (<=1kb)	7	100159244	100168112	8869	2	79690	ENST00000495882.1	0	ENSG00000197093	GAL3ST4	galactose-3-O-sulfotransferase 4
chr18	44358650	44359942	1293	2.02547	1.35511	1.12283	0.289313	Intron (ENST00000664723.1/101927921, intron 2 of 4)	18	44324277	44531462	207186	2	101927921	ENST00000665202.1	171520	ENSG00000267337	LINC01478	long intergenic non-protein coding RNA 1478
chr9	89470350	89470883	534	2.02298	1.39445	1.123	0.289276	Intron (ENST00000339861.8/10507, intron 1 of 18)	9	89361979	89479890	117912	2	10507	ENST00000429836.5	9007	ENSG00000187764	SEMA4D	semaphorin 4D
chr16	84553663	84554609	947	2.02231	2.27579	0.896977	0.343596	Promoter (<=1kb)	16	84489363	84554033	64671	2	57707	ENST00000565079.5	0	ENSG00000140950	MEAK7	MTOR associated protein, eak-7 homolog
chr2	26848384	26849868	1485	2.02224	1.76213	1.00299	0.31659	Promoter (<=1kb)	2	26848424	26927401	78978	1	56896	ENST00000431402.5	0	ENSG00000157851	DPYSL5	dihydropyrimidinase like 5
chr4	48133885	48134563	679	2.02176	1.78658	1.00762	0.315477	Promoter (<=1kb)	4	48066393	48134250	67858	2	7294	ENST00000264316.9	0	ENSG00000074966	TXK	TXK tyrosine kinase
chr14	103056739	103058209	1471	2.02127	3.09105	0.770713	0.379999	Promoter (<=1kb)	14	102932380	103057549	125170	2	9578	ENST00000361246.7	0	ENSG00000198752	CDC42BPB	CDC42 binding protein kinase beta
chr11	66694444	66695326	883	2.0212	1.09161	1.23881	0.265703	Intron (ENST00000533211.6/6712, intron 21 of 37)	11	66696329	66698769	2441	2	6712	ENST00000682471.1	3443	ENSG00000173898	SPTBN2	spectrin beta, non-erythrocytic 2
chr22	38056898	38057964	1067	2.02048	3.31639	0.745291	0.387974	Promoter (<=1kb)	22	38057200	38075701	18502	1	9463	ENST00000404072.7	0	ENSG00000100151	PICK1	protein interacting with PRKCA 1
chr1	23634565	23635740	1176	2.02044	2.13517	0.925767	0.335968	Intron (ENST00000477916.5/259283, intron 5 of 6)	1	23627334	23640568	13235	1	259283	ENST00000374555.7	7231	ENSG00000197880	MDS2	myelodysplastic syndrome 2 translocation associated
chr1	231603398	231604274	877	2.02042	2.90499	0.795285	0.37251	Intron (ENST00000647072.1/100303453, intron 4 of 7)	1	231591292	231612090	20799	2	100287814	ENST00000448058.1	7816	ENSG00000229228	LINC00582	long intergenic non-protein coding RNA 582
chr16	69454048	69455621	1574	2.02023	1.142	1.23003	0.267405	Intron (ENST00000307892.13/80777, intron 3 of 4)	16	69424849	69459572	34724	1	80777	ENST00000568342.2	29199	ENSG00000103018	CYB5B	cytochrome b5 type B
chr12	124910236	124911096	861	2.02022	3.54285	0.721679	0.395596	Promoter (2-3kb)	12	124913035	124914074	1040	2	7316	ENST00000541272.1	2978	ENSG00000150991	UBC	ubiquitin C
chr15	82647365	82648142	778	2.0191	1.76064	1.00243	0.316725	Promoter (<=1kb)	15	82647770	82692820	45051	1	283692	ENST00000560650.1	0	ENSG00000259462	CPEB1-AS1	CPEB1 antisense RNA 1
chr11	277414	277888	475	2.0191	1.09666	1.24597	0.264327	Promoter (<=1kb)	11	278407	285388	6982	1	171389	ENST00000534750.6	-519	ENSG00000174885	NLRP6	NLR family pyrin domain containing 6
chr7	64888066	64889401	1336	2.01885	2.20735	0.905432	0.341332	Promoter (<=1kb)	7	64888527	64890100	1574	2	441239	ENST00000340779.3	699	ENSG00000189316	LOC441239	uncharacterized LOC441239
chr22	24607314	24608175	862	2.01885	1.5038	1.08709	0.29712	Promoter (<=1kb)	22	24607621	24615125	7505	1	2678	ENST00000447416.5	0	ENSG00000100031	GGT1	gamma-glutamyltransferase 1
chr21	36330566	36331497	932	2.01755	1.26987	1.15574	0.282354	Promoter (1-2kb)	21	36333419	36336990	3572	1	23515	ENST00000485933.1	-1922	ENSG00000159256	MORC3	MORC family CW-type zinc finger 3
chr15	100201334	100202249	916	2.01755	1.16701	1.2014	0.273045	Intron (ENST00000268070.9/170691, intron 7 of 21)	15	100168388	100261505	93118	2	170691	ENST00000559976.1	59256	ENSG00000140470	ADAMTS17	ADAM metallopeptidase with thrombospondin type 1 motif 17
chr5	154811549	154812576	1028	2.01755	1.01638	1.27654	0.258547	Promoter (<=1kb)	5	154811388	154813920	2533	1	23367	ENST00000524187.1	161	ENSG00000155506	LARP1	La ribonucleoprotein 1, translational regulator
chr16	980649	982406	1758	2.0166	3.89256	0.694311	0.404705	Promoter (<=1kb)	16	975761	980913	5153	2	115804232	ENST00000562570.1	0	ENSG00000260807	CEROX1	cytoplasmic endogenous regulator of oxidative phosphorylation 1
chr22	31272481	31273369	889	2.01632	1.84124	0.980716	0.322025	Promoter (<=1kb)	22	31272674	31278586	5913	1	3985	ENST00000467301.1	0	ENSG00000182541	LIMK2	LIM domain kinase 2
chr6	17986867	17988664	1798	2.01611	1.79579	1.00221	0.316779	Promoter (<=1kb)	6	17759183	17987463	228281	2	63971	ENST00000378814.9	0	ENSG00000137177	KIF13A	kinesin family member 13A
chr19	51986122	51987449	1328	2.01591	3.05987	0.770714	0.379999	Promoter (<=1kb)	19	51964340	51986840	22501	2	59348	ENST00000243644.9	0	ENSG00000256683	ZNF350	zinc finger protein 350
chr19	52095077	52096338	1262	2.01564	2.90235	0.791099	0.373771	Promoter (<=1kb)	19	52048810	52095738	46929	2	284371	ENST00000598446.1	0	ENSG00000197608	ZNF841	zinc finger protein 841
chr16	1525927	1527519	1593	2.01558	2.42998	0.863459	0.352775	Promoter (<=1kb)	16	1524774	1527024	2251	2	9742	ENST00000566818.1	0	ENSG00000187535	IFT140	intraflagellar transport 140
chr6	122609743	122611101	1359	2.01492	1.82488	0.991623	0.319349	Promoter (<=1kb)	6	122610232	122725892	115661	1	5570	ENST00000368448.5	0	ENSG00000135549	PKIB	cAMP-dependent protein kinase inhibitor beta
chr5	55231447	55231867	421	2.0144	1.33321	1.12993	0.287794	Promoter (1-2kb)	5	55231152	55233597	2446	2	10309	ENST00000501463.2	1730	ENSG00000152669	CCNO	cyclin O
chr17	75747762	75748245	484	2.0144	1.05789	1.25644	0.26233	Intron (ENST00000579662.5/3691, intron 26 of 38)	17	75751813	75755808	3996	1	3691	ENST00000583327.2	-3568	ENSG00000132470	ITGB4	integrin subunit beta 4
chr19	57681434	57682490	1057	2.0138	3.48338	0.725382	0.394387	Promoter (<=1kb)	19	57682045	57753575	71531	1	284309	ENST00000594684.1	0	ENSG00000152443	ZNF776	zinc finger protein 776
chr5	172106791	172107461	671	2.01346	1.76004	1.00501	0.316105	Promoter (<=1kb)	5	172105571	172106798	1228	2	6793	ENST00000517527.1	0	ENSG00000072786	STK10	serine/threonine kinase 10
chr7	73433101	73434309	1209	2.01334	2.64671	0.827178	0.363093	Promoter (<=1kb)	7	73433778	73436120	2343	1	8326	ENST00000344575.5	0	ENSG00000188763	FZD9	frizzled class receptor 9
chr17	7177360	7178038	679	2.01164	1.56901	1.04846	0.305866	Promoter (<=1kb)	17	7173879	7177482	3604	2	432	ENST00000572879.5	0	ENSG00000141505	ASGR1	asialoglycoprotein receptor 1
chr9	113657554	113658396	843	2.01164	1.38357	1.11079	0.291913	Intron (ENST00000428292.1/105376223, intron 2 of 2)	9	113650956	113682855	31900	1	105376223	ENST00000428292.1	6598	NA	LOC105376223	uncharacterized LOC105376223
chr1	156656990	156657841	852	2.01157	2.59342	0.833126	0.361373	Promoter (<=1kb)	1	156656729	156659532	2804	1	63827	ENST00000496038.1	261	ENSG00000132692	BCAN	brevican
chr1	23423880	23425248	1369	2.00929	2.82656	0.794585	0.37272	Promoter (<=1kb)	1	23380909	23424748	43840	2	6920	ENST00000450454.7	0	ENSG00000204219	TCEA3	transcription elongation factor A3
chr19	48403332	48403818	487	2.00824	2.01948	0.944544	0.331115	Intron (ENST00000263269.4/2906, intron 3 of 13)	19	48393668	48444931	51264	1	2906	ENST00000263269.4	9664	ENSG00000105464	GRIN2D	glutamate ionotropic receptor NMDA type subunit 2D
chr6	1604292	1605283	992	2.0078	2.17678	0.90167	0.342337	Promoter (<=1kb)	6	1605531	1606079	549	1	101927703	ENST00000628509.1	-248	NA	FOXCUT	FOXC1 upstream transcript
chr1	1596650	1597771	1122	2.00706	1.09349	1.23739	0.265978	Promoter (2-3kb)	1	1598012	1600135	2124	2	643988	ENST00000422725.4	2364	ENSG00000228594	FNDC10	fibronectin type III domain containing 10
chr14	75539496	75540516	1021	2.0063	2.33144	0.877376	0.348924	Intron (ENST00000555795.1/10538, intron 2 of 2)	14	75522560	75546993	24434	1	10538	ENST00000555504.1	16936	ENSG00000156127	BATF	basic leucine zipper ATF-like transcription factor
chr15	72796456	72797558	1103	2.0043	1.90433	0.964395	0.326085	Intron (ENST00000563592.5/100287559, intron 2 of 2)	15	72786703	72794808	8106	1	100287559	ENST00000670622.1	9753	ENSG00000260898	ADPGK-AS1	ADPGK antisense RNA 1
chr1	27012404	27013429	1026	2.00163	1.38734	1.10019	0.294229	Promoter (<=1kb)	1	27005020	27012850	7831	2	115572	ENST00000289166.6	0	ENSG00000158246	TENT5B	terminal nucleotidyltransferase 5B
chr19	45248612	45249092	481	2.00163	1.26836	1.14628	0.284333	Promoter (2-3kb)	19	45251271	45305284	54014	1	57787	ENST00000262891.9	-2179	ENSG00000007047	MARK4	microtubule affinity regulating kinase 4
chr6	109073126	109073803	678	2.00163	1.23437	1.1607	0.281325	Intron (ENST00000436639.6/27244, intron 1 of 9)	6	109088102	109093968	5867	2	27244	ENST00000517548.1	20165	ENSG00000080546	SESN1	sestrin 1
chr3	138949889	138950378	490	2.00126	1.22862	1.14742	0.284093	Promoter (2-3kb)	3	138947612	138950828	3217	1	401089	ENST00000498709.1	2277	ENSG00000206262	FOXL2NB	FOXL2 neighbor
chr19	56367759	56368697	939	1.99684	2.38051	0.850542	0.356402	Promoter (<=1kb)	19	56368099	56379528	11430	1	147947	ENST00000467807.5	0	ENSG00000240225	ZNF542P	zinc finger protein 542, pseudogene
chr1	24199109	24200118	1010	1.99684	1.76068	0.986354	0.320638	Promoter (<=1kb)	1	24200240	24211693	11454	1	284632	ENST00000439059.2	-122	ENSG00000230023	LINC02800	long intergenic non-protein coding RNA 2800
chr14	99212867	99213396	530	1.99682	1.94962	0.93039	0.334765	Intron (ENST00000345514.2/64919, intron 2 of 2)	14	99169287	99271485	102199	2	64919	ENST00000345514.2	58089	ENSG00000127152	BCL11B	BAF chromatin remodeling complex subunit BCL11B
chr19	44304233	44305395	1163	1.99602	1.97505	0.941985	0.331771	Promoter (<=1kb)	19	44236110	44305019	68910	2	9310	ENST00000589799.5	0	ENSG00000159917	ZNF235	zinc finger protein 235
chr4	155758598	155760174	1577	1.99584	2.71293	0.797748	0.37177	Promoter (<=1kb)	4	155758992	155806790	47799	1	2983	ENST00000505154.5	0	ENSG00000061918	GUCY1B1	guanylate cyclase 1 soluble subunit beta 1
chr21	42527459	42528408	950	1.9948	3.29606	0.729321	0.393106	Intron (ENST00000398341.7/54020, intron 4 of 20)	21	42514524	42518510	3987	1	54020	ENST00000398343.2	12935	ENSG00000160190	SLC37A1	solute carrier family 37 member 1
chr3	186789740	186791351	1612	1.99451	3.25587	0.728994	0.393212	Promoter (<=1kb)	3	186789903	186791850	1948	2	5984	ENST00000417876.1	499	ENSG00000163918	RFC4	replication factor C subunit 4
chr17	43906739	43908307	1569	1.99392	3.62271	0.698665	0.403235	Promoter (<=1kb)	17	43875360	43907536	32177	2	4355	ENST00000269095.9	0	ENSG00000108852	MPP2	membrane palmitoylated protein 2
chr4	14924268	14926020	1753	1.99318	2.91838	0.769989	0.380223	Intron (ENST00000500394.6/441009, intron 7 of 7)	4	14470465	14888169	417705	2	201853	ENST00000505089.6	-36099	ENSG00000248360	LINC00504	long intergenic non-protein coding RNA 504
chr19	7505579	7507866	2288	1.99249	2.45441	0.840385	0.35929	Promoter (<=1kb)	19	7507052	7519622	12571	1	140467	ENST00000597384.1	0	ENSG00000198816	ZNF358	zinc finger protein 358
chr19	44141211	44142273	1063	1.99249	1.88018	0.96078	0.326994	Promoter (<=1kb)	19	44141554	44160313	18760	1	10780	ENST00000426739.7	0	ENSG00000263002	ZNF234	zinc finger protein 234
chr17	44315009	44315875	867	1.99216	1.37826	1.09471	0.295433	Promoter (<=1kb)	17	44299574	44315315	15742	2	101926996	ENST00000588097.5	0	NA	RUNDC3A-AS1	RUNDC3A antisense RNA 1
chr10	5710234	5711891	1658	1.99216	1.25976	1.1408	0.285487	Promoter (<=1kb)	10	5709626	5714574	4949	1	54906	ENST00000527124.1	608	ENSG00000108021	TASOR2	transcription activation suppressor family member 2
chr11	66408312	66409333	1022	1.99189	3.82414	0.683781	0.40829	Promoter (<=1kb)	11	66409158	66410003	846	1	266743	ENST00000527061.1	0	ENSG00000174576	NPAS4	neuronal PAS domain protein 4
chr6	154218745	154219896	1152	1.99168	1.1175	1.17853	0.277659	Promoter (<=1kb)	6	154199723	154219189	19467	2	26034	ENST00000519091.5	0	ENSG00000074706	IPCEF1	interaction protein for cytohesin exchange factors 1
chr16	31442629	31443583	955	1.99119	2.74597	0.794982	0.372601	Promoter (<=1kb)	16	31432593	31443025	10433	2	283933	ENST00000564218.5	0	ENSG00000176723	ZNF843	zinc finger protein 843
chr17	9020818	9022994	2177	1.99113	2.54304	0.824455	0.363884	Promoter (<=1kb)	17	9021510	9244000	222491	1	9423	ENST00000173229.7	0	ENSG00000065320	NTN1	netrin 1
chr19	52335866	52337027	1162	1.99076	2.83283	0.782264	0.376452	Promoter (<=1kb)	19	52336243	52367778	31536	1	162963	ENST00000403906.8	0	ENSG00000167554	ZNF610	zinc finger protein 610
chr8	22668401	22669528	1128	1.99047	4.0036	0.6711	0.412671	Promoter (<=1kb)	8	22620418	22669121	48704	2	55909	ENST00000276416.11	0	ENSG00000147439	BIN3	bridging integrator 3
chr7	131040266	131041216	951	1.98993	2.31291	0.86626	0.351996	Intron (ENST00000642963.1/378805, intron 2 of 6)	7	130944198	131052493	108296	2	378805	ENST00000643373.1	11277	ENSG00000231721	LINC-PINT	long intergenic non-protein coding RNA, p53 induced transcript
chr1	999013	1002038	3026	1.98938	4.1122	0.662894	0.415543	Promoter (<=1kb)	1	998962	1000172	1211	2	57801	ENST00000428771.6	0	ENSG00000188290	HES4	hes family bHLH transcription factor 4
chr9	4297193	4299534	2342	1.9892	3.37218	0.717372	0.39701	Promoter (<=1kb)	9	4299390	4306046	6657	1	107986989	ENST00000440674.1	0	NA	GLIS3-AS2	GLIS3 antisense RNA 2
chr15	64905283	64905946	664	1.98892	1.45207	1.07094	0.300738	Intron (ENST00000502574.1/80301, intron 5 of 5)	15	64911902	64931967	20066	1	348094	ENST00000496480.5	-5956	ENSG00000166839	ANKDD1A	ankyrin repeat and death domain containing 1A
chr17	41835511	41836713	1203	1.98887	2.73603	0.792697	0.373289	Promoter (<=1kb)	17	41825057	41836232	11176	2	115024	ENST00000435506.7	0	ENSG00000141698	NT5C3B	5'-nucleotidase, cytosolic IIIB
chr1	16643877	16645516	1640	1.98884	3.62381	0.696328	0.404023	Promoter (<=1kb)	1	16618273	16644686	26414	2	84809	ENST00000639456.1	0	ENSG00000215908	CROCCP2	CROCC pseudogene 2
chr22	37952854	37954242	1389	1.98766	4.23464	0.654244	0.418602	Promoter (<=1kb)	22	37953697	37967376	13680	1	5435	ENST00000460648.5	0	ENSG00000100142	POLR2F	RNA polymerase II, I and III subunit F
chr16	58126870	58127516	647	1.98592	2.48484	0.833487	0.361269	Promoter (1-2kb)	16	58115792	58129300	13509	2	29105	ENST00000567092.1	1784	ENSG00000070761	CFAP20	cilia and flagella associated protein 20
chr9	89466726	89467476	751	1.98525	2.85194	0.77523	0.378607	Intron (ENST00000339861.8/10507, intron 1 of 18)	9	89377237	89455953	78717	2	10507	ENST00000356444.6	-10773	ENSG00000187764	SEMA4D	semaphorin 4D
chr19	3979102	3979515	414	1.98395	2.12372	0.886689	0.346379	Promoter (<=1kb)	19	3978086	3979459	1374	2	1938	ENST00000596417.1	0	ENSG00000167658	EEF2	eukaryotic translation elongation factor 2
chr10	80472121	80472662	542	1.98395	1.45887	1.0574	0.303811	Intron (ENST00000429989.7/81619, intron 1 of 8)	10	80459302	80518041	58740	1	81619	ENST00000372156.5	12819	ENSG00000108219	TSPAN14	tetraspanin 14
chr8	53879900	53881076	1177	1.98395	1.34552	1.09705	0.294917	Promoter (<=1kb)	8	53880000	53954223	74224	1	8601	ENST00000523414.5	0	ENSG00000147509	RGS20	regulator of G protein signaling 20
chr13	99366648	99368551	1904	1.98361	2.49477	0.829156	0.36252	Promoter (<=1kb)	13	99367787	99377650	9864	1	337867	ENST00000474510.2	0	ENSG00000134882	UBAC2	UBA domain containing 2
chr22	26511929	26512938	1010	1.98208	3.2167	0.728687	0.393312	Promoter (<=1kb)	22	26512555	26513912	1358	1	100507599	ENST00000565764.1	0	NA	TFIP11-DT	TFIP11 divergent transcript
chr7	99588058	99589581	1524	1.9819	1.22156	1.15086	0.283372	Intron (ENST00000455905.1/100289187, intron 2 of 5)	7	99598267	99611045	12779	1	100289187	ENST00000431679.6	-8686	ENSG00000244219	TMEM225B	transmembrane protein 225B
chr19	46529338	46530816	1479	1.98135	1.57663	1.02399	0.311578	Intron (ENST00000602017.5/ENST00000602017.5, intron 1 of 3)	19	46491191	46495867	4677	2	57469	ENST00000599531.2	-33471	ENSG00000204851	PNMA8B	PNMA family member 8B
chr5	150846176	150847510	1335	1.98097	4.34926	0.643035	0.422616	Promoter (<=1kb)	5	150846523	150848669	2147	1	345611	ENST00000522154.1	0	ENSG00000237693	IRGM	immunity related GTPase M
chr17	76181854	76182608	755	1.9792	2.71006	0.790827	0.373853	Intron (ENST00000647930.1/114804, intron 2 of 18)	17	76162761	76167082	4322	2	114804	ENST00000591615.1	-14772	ENSG00000141576	RNF157	ring finger protein 157
chr6	25881861	25882949	1089	1.97838	1.86675	0.950486	0.329599	Promoter (<=1kb)	6	25845100	25882286	37187	2	10786	ENST00000360657.7	0	ENSG00000124564	SLC17A3	solute carrier family 17 member 3
chr7	100015118	100016495	1378	1.97767	3.89227	0.670007	0.413052	Promoter (<=1kb)	7	100015572	100041688	26117	1	7586	ENST00000535170.5	0	ENSG00000106261	ZKSCAN1	zinc finger with KRAB and SCAN domains 1
chr19	932661	933518	858	1.97663	1.06592	1.19558	0.27421	Promoter (<=1kb)	19	932565	964366	31802	1	1820	ENST00000457152.3	96	ENSG00000116017	ARID3A	AT-rich interaction domain 3A
chr12	107368597	107369985	1389	1.97614	2.2858	0.862135	0.353145	Intron (ENST00000420571.6/121551, intron 1 of 14)	12	107320588	107610356	289769	1	121551	ENST00000415943.6	48009	ENSG00000151136	BTBD11	BTB domain containing 11
chr12	120235926	120236413	488	1.97545	1.06776	1.2057	0.27219	Intron (ENST00000267257.11/5829, intron 1 of 10)	12	120210448	120226844	16397	2	5829	ENST00000536957.5	-9082	ENSG00000089159	PXN	paxillin
chr13	25973311	25974291	981	1.97516	1.72283	0.970405	0.324582	Intron (ENST00000381655.7/51761, intron 35 of 36)	13	26009971	26025102	15132	1	51761	ENST00000683868.1	-35680	ENSG00000132932	ATP8A2	ATPase phospholipid transporting 8A2
chr11	46352251	46352902	652	1.97509	3.17569	0.727106	0.393825	Intron (ENST00000343674.10/8525, intron 1 of 30)	11	46347588	46380367	32780	1	8525	ENST00000318201.12	4663	ENSG00000149091	DGKZ	diacylglycerol kinase zeta
chr3	194325660	194328403	2744	1.97433	3.26359	0.718317	0.396699	Promoter (2-3kb)	3	194301199	194322871	21673	2	100131551	ENST00000660996.1	-2789	ENSG00000214145	LINC00887	long intergenic non-protein coding RNA 887
chr2	27303092	27303683	592	1.97383	1.76963	0.966607	0.325531	Promoter (1-2kb)	2	27304691	27305779	1089	1	57159	ENST00000488321.1	-1008	ENSG00000138100	TRIM54	tripartite motif containing 54
chr1	26408042	26409403	1362	1.97371	1.58298	1.01847	0.312884	Promoter (1-2kb)	1	26410817	26429719	18903	1	79727	ENST00000254231.4	-1414	ENSG00000131914	LIN28A	lin-28 homolog A
chr15	38690256	38690992	737	1.97359	2.40061	0.832614	0.361521	Intron (ENST00000647456.1/105370775, intron 2 of 6)	15	38696598	38700038	3441	1	400359	ENST00000643127.1	-5606	ENSG00000175779	LINC02694	long intergenic non-protein coding RNA 2694
chr4	40325111	40326072	962	1.97349	1.96483	0.921414	0.337107	Intron (ENST00000510551.1/101060498, intron 1 of 2)	4	40316485	40330419	13935	1	101060498	ENST00000510551.1	8626	ENSG00000249241	LINC02265	long intergenic non-protein coding RNA 2265
chr1	145720593	145721782	1190	1.97349	1.91295	0.933419	0.333979	Promoter (1-2kb)	1	145719499	145739288	19790	1	11126	ENST00000369288.7	1094	ENSG00000117281	CD160	CD160 molecule
chr20	63968926	63970541	1616	1.9733	2.08475	0.896266	0.343788	Promoter (<=1kb)	20	63956704	63969930	13227	2	57473	ENST00000369888.6	0	ENSG00000196700	ZNF512B	zinc finger protein 512B
chr19	44002249	44003897	1649	1.9731	3.72423	0.678875	0.409977	Promoter (<=1kb)	19	43996896	44002836	5941	2	101928063	ENST00000586860.1	0	ENSG00000266921	ZNF230-DT	ZNF230 divergent transcript
chr11	10792307	10793279	973	1.97306	2.79325	0.771283	0.379823	Intron (ENST00000532365.2/9646, intron 3 of 3)	11	10798743	10799361	619	2	1982	ENST00000534470.1	6082	ENSG00000110321	EIF4G2	eukaryotic translation initiation factor 4 gamma 2
chr18	13216223	13218781	2559	1.97002	4.43399	0.630683	0.427107	Promoter (<=1kb)	18	13217498	13387577	170080	1	753	ENST00000590371.5	0	ENSG00000168675	LDLRAD4	low density lipoprotein receptor class A domain containing 4
chr11	123053908	123055908	2001	1.9699	4.10606	0.650675	0.419874	Promoter (2-3kb)	11	123058077	123058161	85	2	85391	ENST00000364009.1	2253	ENSG00000200879	SNORD14E	small nucleolar RNA, C/D box 14E
chr21	45590513	45593015	2503	1.96869	4.87283	0.604959	0.436695	Promoter (<=1kb)	21	45593654	45603056	9403	1	105372840	ENST00000441095.2	-639	ENSG00000233922	LINC01694	long intergenic non-protein coding RNA 1694
chr19	2034739	2035605	867	1.96846	2.62308	0.793818	0.372951	Promoter (<=1kb)	19	1993101	2034881	41781	2	107985278	ENST00000590646.5	0	NA	LOC107985278	uncharacterized LOC107985278
chr2	160473378	160475131	1754	1.96811	2.14866	0.878947	0.348493	Intron (ENST00000474820.5/5937, intron 1 of 15)	2	160366913	160492969	126057	2	5937	ENST00000477486.1	17838	ENSG00000153250	RBMS1	RNA binding motif single stranded interacting protein 1
chr1	167267429	167268401	973	1.96765	1.8784	0.935319	0.333488	Intron (ENST00000559038.5/5451, intron 2 of 4)	1	167251919	167415908	163990	1	5451	ENST00000648671.1	15510	ENSG00000143190	POU2F1	POU class 2 homeobox 1
chr22	31159579	31160916	1338	1.96702	3.10962	0.730211	0.392817	Promoter (<=1kb)	22	31160062	31160119	58	2	100500901	ENST00000583386.1	0	ENSG00000264141	MIR3928	microRNA 3928
chr16	89333610	89334214	605	1.96658	1.51174	1.02677	0.310922	Intron (ENST00000378330.7/29123, intron 3 of 13)	16	89300696	89328986	28291	2	29123	ENST00000563291.1	-4624	ENSG00000167522	ANKRD11	ankyrin repeat domain 11
chr1	209674732	209675762	1031	1.96536	1.09137	1.18048	0.277262	Promoter (<=1kb)	1	209661364	209675247	13884	2	101930114	ENST00000445272.5	0	ENSG00000227591	HSD11B1-AS1	HSD11B1 antisense RNA 1
chr2	73202162	73203487	1326	1.96493	1.18431	1.13313	0.287111	Promoter (<=1kb)	2	73202574	73212513	9940	1	344022	ENST00000398468.4	0	ENSG00000214513	NOTO	notochord homeobox
chr7	108454807	108456864	2058	1.96444	2.40773	0.809187	0.368363	Promoter (<=1kb)	7	108147626	108456397	308772	2	4897	ENST00000413765.6	0	ENSG00000091129	NRCAM	neuronal cell adhesion molecule
chr1	204151298	204152626	1329	1.96397	3.32854	0.70462	0.401238	Promoter (<=1kb)	1	204131062	204151894	20833	2	55224	ENST00000367201.7	0	ENSG00000143845	ETNK2	ethanolamine kinase 2
chr22	39925906	39927263	1358	1.96218	2.58622	0.792402	0.373378	Promoter (<=1kb)	22	39926591	39960175	33585	1	9402	ENST00000420971.5	0	ENSG00000100351	GRAP2	GRB2 related adaptor protein 2
chr4	40316319	40317815	1497	1.96173	3.48543	0.69123	0.405749	Promoter (<=1kb)	4	40316485	40330419	13935	1	101060498	ENST00000510551.1	0	ENSG00000249241	LINC02265	long intergenic non-protein coding RNA 2265
chr15	82045536	82047664	2129	1.96132	5.4585	0.570831	0.449931	Promoter (<=1kb)	15	82041778	82046018	4241	2	84206	ENST00000329713.5	0	ENSG00000183496	MEX3B	mex-3 RNA binding family member B
chr21	33605555	33606592	1038	1.96006	1.63594	0.987067	0.320463	Promoter (2-3kb)	21	33596062	33603448	7387	2	9946	ENST00000414079.5	-2107	ENSG00000205758	CRYZL1	crystallin zeta like 1
chr19	45523234	45524325	1092	1.95988	2.76106	0.769701	0.380312	Promoter (<=1kb)	19	45524037	45526202	2166	1	7408	ENST00000588273.1	0	ENSG00000125753	VASP	vasodilator stimulated phosphoprotein
chr14	61456593	61457009	417	1.9595	1.56784	1.00477	0.316162	Promoter (<=1kb)	14	61456842	61457625	784	1	5583	ENST00000557559.1	0	ENSG00000027075	PRKCH	protein kinase C eta
chr6	25049885	25050960	1076	1.95912	2.51471	0.807566	0.368844	Intron (ENST00000428903.1/ENST00000428903.1, intron 1 of 2)	6	25014952	25042170	27219	2	102724765	ENST00000606385.1	-7715	NA	LOC102724765	uncharacterized LOC102724765
chr2	74515140	74516695	1556	1.95792	2.83744	0.756445	0.384446	Promoter (<=1kb)	2	74514450	74517148	2699	1	3196	ENST00000233638.8	690	ENSG00000115297	TLX2	T cell leukemia homeobox 2
chr5	150671871	150672711	841	1.95743	1.7172	0.957276	0.327877	Promoter (<=1kb)	5	150672057	150676865	4809	1	91977	ENST00000520112.1	0	ENSG00000164591	MYOZ3	myozenin 3
chr21	5154473	5155128	656	1.95741	3.53589	0.682689	0.408665	Promoter (<=1kb)	21	5130871	5154658	23788	2	102724159	ENST00000617716.4	0	ENSG00000275464	LOC102724159	periodic tryptophan protein 2 homolog
chr7	152335764	152337213	1450	1.95686	2.25092	0.852229	0.355925	Intron (ENST00000262189.11/58508, intron 2 of 58)	7	152263016	152330739	67724	2	58508	ENST00000684262.1	-5025	ENSG00000055609	KMT2C	lysine methyltransferase 2C
chr10	16891124	16892051	928	1.95656	1.29819	1.08491	0.297606	Intron (ENST00000377833.10/8029, intron 54 of 66)	10	16900827	16907746	6920	2	8029	ENST00000649933.1	15695	ENSG00000107611	CUBN	cubilin
chr16	89925954	89926601	648	1.95631	3.27339	0.705454	0.40096	Promoter (2-3kb)	16	89929093	89936092	7000	1	10381	ENST00000680788.1	-2492	ENSG00000258947	TUBB3	tubulin beta 3 class III
chr6	43687224	43688345	1122	1.95628	2.61665	0.788667	0.374506	Promoter (<=1kb)	6	43671202	43687791	16590	2	55168	ENST00000372133.8	0	ENSG00000096080	MRPS18A	mitochondrial ribosomal protein S18A
chr9	112074248	112075351	1104	1.95559	1.95583	0.906715	0.34099	Intron (ENST00000374270.8/64420, intron 12 of 16)	9	112041083	112058471	17389	2	64420	ENST00000475283.2	-15777	ENSG00000106868	SUSD1	sushi domain containing 1
chr3	72938372	72939332	961	1.95492	1.86453	0.926432	0.335795	Intron (ENST00000389617.9/727936, intron 3 of 6)	3	72955215	72998138	42924	1	727936	ENST00000491839.1	-15883	ENSG00000172986	GXYLT2	glucoside xylosyltransferase 2
chr17	57892063	57893359	1297	1.95444	1.25551	1.09382	0.29563	Promoter (<=1kb)	17	57862696	57892688	29993	2	404093	ENST00000407144.6	0	ENSG00000180891	CUEDC1	CUE domain containing 1
chr14	98167380	98168424	1045	1.95313	1.29414	1.07378	0.300097	Intron (ENST00000555776.1/105370655, intron 1 of 2)	14	98136074	98139242	3169	1	105370652	ENST00000557072.1	31306	NA	LINC02295	long intergenic non-protein coding RNA 2295
chr22	23762761	23763957	1197	1.95252	1.74639	0.95029	0.329648	Promoter (<=1kb)	22	23762990	23765863	2874	1	150248	ENST00000402217.8	0	ENSG00000169314	C22orf15	chromosome 22 open reading frame 15
chr2	106137886	106139709	1824	1.95225	2.31527	0.832848	0.361453	Promoter (<=1kb)	2	106093604	106138881	45278	2	80146	ENST00000409032.5	0	ENSG00000115652	UXS1	UDP-glucuronate decarboxylase 1
chr14	104794226	104795831	1606	1.95183	2.94477	0.740823	0.3894	Promoter (<=1kb)	14	104769349	104795748	26400	2	207	ENST00000407796.7	0	ENSG00000142208	AKT1	AKT serine/threonine kinase 1
chr17	82909011	82910099	1089	1.95171	1.74261	0.866494	0.351931	Promoter (<=1kb)	17	82908277	82927311	19035	1	6904	ENST00000571618.5	734	ENSG00000141556	TBCD	tubulin folding cofactor D
chr2	224401071	224402328	1258	1.95154	2.07635	0.878919	0.348501	Promoter (<=1kb)	2	224378698	224401994	23297	2	79843	ENST00000389874.3	0	ENSG00000124019	FAM124B	family with sequence similarity 124 member B
chr19	48880442	48880976	535	1.95048	2.37961	0.812829	0.367288	Promoter (1-2kb)	19	48880971	48882125	1155	2	7288	ENST00000522341.1	1149	ENSG00000104804	TULP2	TUB like protein 2
chr5	149271614	149272587	974	1.94974	1.2244	1.08858	0.296789	Promoter (<=1kb)	5	149271859	149343637	71779	1	134265	ENST00000296721.9	0	ENSG00000157510	AFAP1L1	actin filament associated protein 1 like 1
chr17	10729297	10730133	837	1.94927	1.78729	0.933049	0.334075	Promoter (<=1kb)	17	10729777	10767006	37230	1	101101775	ENST00000581366.5	0	ENSG00000263400	TMEM220-AS1	TMEM220 antisense RNA 1
chr10	72222711	72223829	1119	1.94927	1.43172	1.03355	0.30933	Promoter (<=1kb)	10	72223133	72233829	10697	1	119504	ENST00000470481.2	0	ENSG00000166295	ANAPC16	anaphase promoting complex subunit 16
chr14	96741177	96742011	835	1.94927	1.3124	1.07526	0.299765	Promoter (<=1kb)	14	96741181	96792984	51804	1	105370646	ENST00000654843.1	0	ENSG00000258979	LINC02299	long intergenic non-protein coding RNA 2299
chr7	77758863	77759879	1017	1.94927	1.2151	1.1141	0.291196	Promoter (<=1kb)	7	77759595	77778611	19017	1	222194	ENST00000445512.5	0	ENSG00000187257	RSBN1L	round spermatid basic protein 1 like
chr19	42108395	42109389	995	1.94906	1.69504	0.963918	0.326205	Intron (ENST00000389341.9/5452, intron 5 of 13)	19	42095809	42117432	21624	2	5452	ENST00000526831.2	8043	ENSG00000028277	POU2F2	POU class 2 homeobox 2
chr2	97709859	97710655	797	1.94894	1.99796	0.895174	0.344082	Promoter (2-3kb)	2	97713576	97739860	26285	1	7535	ENST00000264972.10	-2921	ENSG00000115085	ZAP70	zeta chain of T cell receptor associated protein kinase 70
chr12	122093623	122095812	2190	1.94792	1.42835	1.03129	0.309859	Intron (ENST00000319080.12/22877, intron 1 of 16)	12	122078756	122147344	68589	1	22877	ENST00000319080.12	14867	ENSG00000175727	MLXIP	MLX interacting protein
chr6	90217956	90219667	1712	1.94773	3.35007	0.690352	0.406047	Promoter (<=1kb)	6	90089054	90218245	129192	2	60468	ENST00000493201.5	0	ENSG00000112182	BACH2	BTB domain and CNC homolog 2
chr8	37747385	37748624	1240	1.94737	2.04566	0.882622	0.347488	Promoter (<=1kb)	8	37747338	37748004	667	2	728024	ENST00000521192.2	0	NA	LOC728024	STING1 ER exit protein 1 pseudogene
chr11	68209304	68209787	484	1.94649	2.01228	0.888408	0.345912	Promoter (2-3kb)	11	68180155	68212754	32600	2	51111	ENST00000434573.1	2967	ENSG00000110066	KMT5B	lysine methyltransferase 5B
chr1	27349142	27350022	881	1.94638	1.3912	1.03979	0.307873	Promoter (<=1kb)	1	27349476	27351545	2070	1	84958	ENST00000496001.5	0	ENSG00000142765	SYTL1	synaptotagmin like 1
chr1	120914005	120914528	524	1.94614	2.55638	0.78795	0.374723	Promoter (<=1kb)	1	120913151	120914238	1088	2	100996720	ENST00000626088.1	0	NA	LOC100996720	uncharacterized LOC100996720
chr17	32461654	32462583	930	1.94589	2.316	0.831354	0.361884	Intron (ENST00000578213.5/5717, intron 3 of 4)	17	32469072	32479282	10211	1	5717	ENST00000584340.1	-6489	ENSG00000108671	PSMD11	proteasome 26S subunit, non-ATPase 11
chr10	125160946	125161886	941	1.94586	1.74527	0.945022	0.330993	Promoter (<=1kb)	10	124989225	125161026	171802	2	1488	ENST00000411419.6	0	ENSG00000175029	CTBP2	C-terminal binding protein 2
chr14	22980788	22981765	978	1.94555	2.29498	0.830469	0.36214	Promoter (<=1kb)	14	22978612	22981586	2975	2	84962	ENST00000553736.1	0	ENSG00000129474	AJUBA	ajuba LIM protein
chr2	43773472	43774753	1282	1.94511	2.24163	0.845928	0.35771	Promoter (<=1kb)	2	43774039	43810010	35972	1	51626	ENST00000260605.12	0	ENSG00000138036	DYNC2LI1	dynein cytoplasmic 2 light intermediate chain 1
chr22	31969890	31971252	1363	1.94498	3.96562	0.64482	0.421973	Promoter (<=1kb)	22	31970823	32006886	36064	1	105372999	ENST00000416995.2	0	NA	LINC02558	long intergenic non-protein coding RNA 2558
chr16	88472069	88472823	755	1.94343	2.12293	0.861133	0.353425	Intron (ENST00000319555.8/161882, intron 1 of 9)	16	88468918	88469031	114	1	100847057	ENST00000577370.1	3151	ENSG00000263456	MIR5189	microRNA 5189
chr4	108049238	108050818	1581	1.94313	2.99026	0.72596	0.394199	Intron (ENST00000379951.6/51176, intron 9 of 9)	4	108048527	108070895	22369	2	51176	ENST00000507470.5	20077	ENSG00000138795	LEF1	lymphoid enhancer binding factor 1
chr2	97696837	97697871	1035	1.94313	1.57122	0.986553	0.320589	Promoter (<=1kb)	2	97697257	97703049	5793	1	728537	ENST00000628093.1	0	ENSG00000228486	C2orf92	chromosome 2 open reading frame 92
chr16	3443085	3444362	1278	1.94197	4.03316	0.638886	0.424117	Promoter (<=1kb)	16	3432414	3443504	11091	2	146434	ENST00000301744.7	0	ENSG00000167981	ZNF597	zinc finger protein 597
chr6	44254010	44254403	394	1.94154	2.00312	0.877728	0.348828	Promoter (<=1kb)	6	44254206	44254285	80	2	100616124	ENST00000583964.1	0	ENSG00000284427	MIR4647	microRNA 4647
chr14	102096214	102097145	932	1.94154	1.14931	1.13568	0.28657	Intron (ENST00000334701.11/3320, intron 2 of 11)	14	102085886	102087044	1159	2	3320	ENST00000556554.1	-9170	ENSG00000080824	HSP90AA1	heat shock protein 90 alpha family class A member 1
chr15	24772914	24773527	614	1.94128	1.12906	1.09651	0.295037	Intron (ENST00000651136.1/791114, intron 9 of 14)	15	24823637	24967985	144349	1	6638	ENST00000400098.6	-50110	ENSG00000128739	SNRPN	small nuclear ribonucleoprotein polypeptide N
chr21	24428249	24429503	1255	1.94091	1.40037	1.04302	0.307123	Promoter (<=1kb)	21	24428729	24526892	98164	1	105372751	ENST00000653855.1	0	ENSG00000237484	LINC01684	long intergenic non-protein coding RNA 1684
chr6	35624070	35625222	1153	1.9405	2.15339	0.85411	0.355395	Intron (ENST00000539068.5/2289, intron 3 of 10)	6	35664717	35664789	73	2	100847048	ENST00000583739.1	39567	ENSG00000265527	MIR5690	microRNA 5690
chr14	89429797	89431296	1500	1.94025	4.2204	0.626348	0.428701	Intron (ENST00000345097.8/1112, intron 1 of 6)	14	89417354	89419793	2440	1	400236	ENST00000555562.1	12443	ENSG00000258920	FOXN3-AS1	FOXN3 antisense RNA 1
chr10	71756516	71757735	1220	1.94019	3.65448	0.662401	0.415716	Promoter (<=1kb)	10	71750916	71757630	6715	2	64115	ENST00000470317.2	0	ENSG00000107738	VSIR	V-set immunoregulatory receptor
chr22	46044019	46045540	1522	1.93998	2.52983	0.788519	0.374551	Promoter (<=1kb)	22	46040266	46044610	4345	2	100271722	ENST00000421538.1	0	NA	LINC00899	long intergenic non-protein coding RNA 899
chr12	117155140	117155983	844	1.93975	1.83336	0.912629	0.339421	Promoter (2-3kb)	12	117154250	117158028	3779	2	23014	ENST00000547806.1	2045	ENSG00000135108	FBXO21	F-box protein 21
chr1	119711811	119713089	1279	1.93975	1.31075	1.06489	0.302105	Promoter (<=1kb)	1	119711884	119727063	15180	1	26227	ENST00000642041.1	0	ENSG00000092621	PHGDH	phosphoglycerate dehydrogenase
chr19	51904367	51905472	1106	1.93922	3.25359	0.696134	0.404088	Promoter (<=1kb)	19	51889235	51905017	15783	2	65251	ENST00000354957.8	0	ENSG00000198093	ZNF649	zinc finger protein 649
chr5	35796673	35797839	1167	1.93917	2.28967	0.828245	0.362783	Intron (ENST00000356031.8/79925, intron 33 of 36)	5	35781320	35790450	9131	1	79925	ENST00000635995.1	15353	ENSG00000152582	SPEF2	sperm flagellar 2
chr10	99993887	99994968	1082	1.93789	1.68592	0.95231	0.329135	Intron (ENST00000324109.9/23268, intron 1 of 16)	10	99875577	100009947	134371	2	23268	ENST00000324109.9	14979	ENSG00000107554	DNMBP	dynamin binding protein
chr15	75758239	75759182	944	1.93773	1.16796	1.11838	0.29027	Promoter (<=1kb)	15	75758491	75763322	4832	1	101929408	ENST00000658217.1	0	NA	LOC101929408	uncharacterized LOC101929408
chr3	114296721	114297215	495	1.93773	1.0525	1.1727	0.27885	Promoter (1-2kb)	3	114294987	114307949	12963	1	201633	ENST00000484319.1	1734	ENSG00000181847	TIGIT	T cell immunoreceptor with Ig and ITIM domains
chr6	36601179	36602386	1208	1.9374	3.29901	0.688085	0.406819	Promoter (1-2kb)	6	36599438	36602776	3339	1	6428	ENST00000620389.1	1741	ENSG00000112081	SRSF3	serine and arginine rich splicing factor 3
chr9	132877852	132879124	1273	1.93703	2.9935	0.723265	0.395078	Promoter (<=1kb)	9	132878027	132890031	12005	1	11092	ENST00000372136.7	0	ENSG00000165698	SPACA9	sperm acrosome associated 9
chr9	93020672	93021239	568	1.93672	1.43398	0.971601	0.324284	Intron (ENST00000375482.8/89846, intron 13 of 17)	9	93015651	93018200	2550	1	89846	ENST00000494553.1	5021	ENSG00000127084	FGD3	FYVE, RhoGEF and PH domain containing 3
chr19	3721202	3722408	1207	1.93656	2.69021	0.76162	0.382825	Promoter (<=1kb)	19	3721617	3730287	8671	1	27134	ENST00000587912.1	0	ENSG00000105289	TJP3	tight junction protein 3
chr19	43826781	43827932	1152	1.93656	2.48888	0.793949	0.372912	Promoter (<=1kb)	19	43798502	43827199	28698	2	284348	ENST00000602179.1	0	ENSG00000159871	LYPD5	LY6/PLAUR domain containing 5
chr9	89443904	89445294	1391	1.93546	3.01809	0.718374	0.39668	Intron (ENST00000339861.8/10507, intron 1 of 18)	9	89405602	89436578	30977	2	10507	ENST00000482128.1	-7326	ENSG00000187764	SEMA4D	semaphorin 4D
chr19	45562586	45563358	773	1.93542	1.87203	0.896223	0.343799	Intron (ENST00000323060.3/80207, intron 1 of 1)	19	45546281	45584802	38522	2	80207	ENST00000263275.5	21444	ENSG00000125741	OPA3	outer mitochondrial membrane lipid metabolism regulator OPA3
chr16	14302208	14303144	937	1.93542	1.73264	0.929276	0.335054	Promoter (<=1kb)	16	14302245	14328939	26695	1	100129781	ENST00000570945.2	0	ENSG00000262454	MIR193BHG	MIR193b-365a host gene
chr17	78730505	78731021	517	1.93542	1.46032	1.00507	0.316091	Promoter (2-3kb)	17	78700331	78727965	27635	2	9267	ENST00000586043.5	-2540	ENSG00000108669	CYTH1	cytohesin 1
chr1	45569665	45570770	1106	1.93542	1.18304	1.10647	0.292853	Promoter (<=1kb)	1	45569050	45570045	996	1	10327	ENST00000475985.1	615	ENSG00000117448	AKR1A1	aldo-keto reductase family 1 member A1
chr22	42368478	42369913	1436	1.93433	4.41895	0.611172	0.434349	Promoter (<=1kb)	22	42364390	42369284	4895	2	102723775	ENST00000653912.1	0	ENSG00000229891	LINC01315	long intergenic non-protein coding RNA 1315
chr4	1792683	1793893	1211	1.93424	1.96095	0.88838	0.34592	Promoter (<=1kb)	4	1793293	1808867	15575	1	2261	ENST00000440486.8	0	ENSG00000068078	FGFR3	fibroblast growth factor receptor 3
chr17	49998023	49998586	564	1.93419	1.48602	1.00291	0.31661	Promoter (2-3kb)	17	49990005	49995224	5220	2	1747	ENST00000434704.2	-2799	ENSG00000064195	DLX3	distal-less homeobox 3
chr19	55173734	55174262	529	1.93407	1.00409	1.1657	0.28029	Promoter (<=1kb)	19	55173640	55174566	927	2	6861	ENST00000590859.1	304	ENSG00000129990	SYT5	synaptotagmin 5
chr18	2681373	2683331	1959	1.93363	2.16734	0.847133	0.357368	Intron (ENST00000320876.11/23347, intron 5 of 47)	18	2688641	2697216	8576	1	23347	ENST00000581226.1	-5310	ENSG00000101596	SMCHD1	structural maintenance of chromosomes flexible hinge domain containing 1
chr14	23576422	23577841	1420	1.93278	1.3121	1.04938	0.305654	Promoter (<=1kb)	14	23568035	23577457	9423	2	84502	ENST00000622501.4	0	ENSG00000092051	JPH4	junctophilin 4
chr1	35715316	35715957	642	1.93231	1.85663	0.911906	0.339612	Promoter (<=1kb)	1	35716160	35716911	752	2	127703	ENST00000503824.1	954	ENSG00000142686	C1orf216	chromosome 1 open reading frame 216
chr4	48127623	48128838	1216	1.93216	2.92935	0.726588	0.393994	Intron (ENST00000264316.9/7294, intron 1 of 14)	4	48089385	48134229	44845	2	7294	ENST00000510457.1	5391	ENSG00000074966	TXK	TXK tyrosine kinase
chr4	38855961	38858115	2155	1.93214	3.85327	0.643642	0.422397	Promoter (<=1kb)	4	38823715	38856817	33103	2	10333	ENST00000436693.6	0	ENSG00000174130	TLR6	toll like receptor 6
chr19	15231872	15233885	2014	1.93151	2.1035	0.852189	0.355937	Promoter (<=1kb)	19	15226919	15232448	5530	2	79852	ENST00000221730.8	0	ENSG00000105131	EPHX3	epoxide hydrolase 3
chr1	161097316	161098765	1450	1.93143	4.28126	0.617599	0.431943	Promoter (<=1kb)	1	161098361	161100298	1938	1	126823	ENST00000490724.6	0	ENSG00000162755	KLHDC9	kelch domain containing 9
chr19	11813591	11814853	1263	1.9314	3.71055	0.652684	0.419157	Promoter (<=1kb)	19	11814273	11835216	20944	1	126070	ENST00000304060.10	0	ENSG00000171295	ZNF440	zinc finger protein 440
chr17	80663763	80665765	2003	1.93124	2.99237	0.717891	0.396839	Intron (ENST00000574767.5/57521, intron 2 of 11)	17	80708933	80754104	45172	1	57521	ENST00000572733.1	-43168	ENSG00000141564	RPTOR	regulatory associated protein of MTOR complex 1
chr1	20507409	20508580	1172	1.93077	3.89319	0.640736	0.423447	Promoter (<=1kb)	1	20499448	20508151	8704	2	79594	ENST00000264198.5	0	ENSG00000090432	MUL1	mitochondrial E3 ubiquitin protein ligase 1
chr16	12089357	12090252	896	1.92995	1.19943	1.06819	0.301359	Promoter (<=1kb)	16	12086746	12090302	3557	2	642696	ENST00000312019.2	50	NA	LOC642696	uncharacterized LOC642696
chr8	70069240	70070436	1197	1.92956	1.57656	0.967775	0.325239	Promoter (<=1kb)	8	70051651	70071252	19602	2	63978	ENST00000276594.3	816	ENSG00000147596	PRDM14	PR/SET domain 14
chr2	218995795	218996610	816	1.92941	1.90069	0.89543	0.344013	Promoter (2-3kb)	2	218990190	218993422	3233	2	1412	ENST00000295728.7	-2373	ENSG00000163499	CRYBA2	crystallin beta A2
chr16	31214985	31216972	1988	1.9293	2.73591	0.748194	0.387051	Promoter (<=1kb)	16	31215962	31216370	409	2	260434	ENST00000568383.5	0	ENSG00000169900	PYDC1	pyrin domain containing 1
chr22	29071522	29073439	1918	1.92915	3.70303	0.652435	0.419246	Promoter (<=1kb)	22	29073035	29146820	73786	1	83999	ENST00000400335.9	0	ENSG00000183762	KREMEN1	kringle containing transmembrane protein 1
chr14	61390233	61391003	771	1.92788	2.03175	0.86945	0.351111	Promoter (<=1kb)	14	61390694	61457557	66864	1	5583	ENST00000557585.5	0	ENSG00000027075	PRKCH	protein kinase C eta
chr10	8404178	8405452	1275	1.92733	3.22754	0.690388	0.406035	Intron (ENST00000413286.1/105376396, intron 2 of 3)	10	8400860	8461863	61004	1	105376396	ENST00000413286.1	3318	NA	LOC105376396	uncharacterized LOC105376396
chr17	31558575	31559888	1314	1.92723	2.6729	0.757526	0.384106	Promoter (<=1kb)	17	31559996	31560083	88	1	406968	ENST00000384882.1	-108	ENSG00000207614	MIR193A	microRNA 193a
chr20	63178907	63179847	941	1.92687	2.46867	0.788551	0.374541	Promoter (<=1kb)	20	63178500	63178586	87	1	406909	ENST00000384866.1	407	ENSG00000207598	MIR124-3	microRNA 124-3
chr19	45971820	45972733	914	1.92678	1.26952	1.06349	0.302424	Promoter (<=1kb)	19	45967394	45973309	5916	2	4858	ENST00000599462.1	576	ENSG00000104967	NOVA2	NOVA alternative splicing regulator 2
chr20	59148645	59150572	1928	1.92651	4.49385	0.602466	0.437641	Intron (ENST00000637017.1/128611, intron 2 of 7)	20	59163821	59259113	95293	1	128611	ENST00000371030.4	-13249	ENSG00000124203	ZNF831	zinc finger protein 831
chr9	128093207	128094752	1546	1.92632	2.61616	0.761797	0.382769	Promoter (1-2kb)	9	128091586	128109055	17470	1	114789	ENST00000682638.1	1621	ENSG00000148339	SLC25A25	solute carrier family 25 member 25
chr20	56418214	56419365	1152	1.92534	2.7406	0.746813	0.38749	Intron (ENST00000360314.7/57091, intron 2 of 6)	20	56412393	56459004	46612	1	57091	ENST00000679529.1	5821	ENSG00000087589	CASS4	Cas scaffold protein family member 4
chr19	37654778	37656243	1466	1.92512	4.52541	0.5997	0.438695	Promoter (<=1kb)	19	37631006	37655465	24460	2	22835	ENST00000684514.1	0	ENSG00000120784	ZFP30	ZFP30 zinc finger protein
chr15	90563729	90564572	844	1.92468	1.53686	0.977426	0.322838	Intron (ENST00000268184.11/64784, intron 2 of 14)	15	90539617	90595577	55961	1	64784	ENST00000560927.1	24112	ENSG00000140577	CRTC3	CREB regulated transcription coactivator 3
chr17	43994336	43995484	1149	1.92468	1.4789	0.994943	0.31854	Intron (ENST00000360085.6/5697, intron 1 of 6)	17	43952738	44004469	51732	2	5697	ENST00000360085.6	8985	ENSG00000131096	PYY	peptide YY
chr19	44071526	44072866	1341	1.92426	2.79979	0.737769	0.390379	Promoter (<=1kb)	19	44072159	44089613	17455	1	342909	ENST00000421176.4	0	ENSG00000186026	ZNF284	zinc finger protein 284
chr8	22047742	22049562	1821	1.92383	2.63746	0.759898	0.383363	Promoter (<=1kb)	8	22048995	22069056	20062	1	2039	ENST00000522148.5	0	ENSG00000158856	DMTN	dematin actin binding protein
chr17	2415651	2416891	1241	1.92359	1.05372	1.15124	0.283293	Promoter (<=1kb)	17	2405562	2416085	10524	2	284009	ENST00000571332.5	0	NA	LOC284009	uncharacterized LOC284009
chr22	32411461	32412855	1395	1.92312	3.03232	0.709567	0.39959	Promoter (<=1kb)	22	32387582	32412247	24666	2	51493	ENST00000216038.6	0	ENSG00000100220	RTCB	RNA 2',3'-cyclic phosphate and 5'-OH ligase
chr19	43950833	43951785	953	1.92311	1.15709	1.1165	0.290677	Promoter (<=1kb)	19	43951223	43965893	14671	1	7638	ENST00000591168.5	0	ENSG00000159905	ZNF221	zinc finger protein 221
chr20	31869788	31870814	1027	1.92185	1.53386	0.973823	0.323732	Promoter (<=1kb)	20	31847637	31870664	23028	2	128853	ENST00000278979.7	0	ENSG00000149599	DUSP15	dual specificity phosphatase 15
chr5	56058222	56059474	1253	1.92135	3.20413	0.686363	0.407407	Promoter (<=1kb)	5	56059020	56111211	52192	1	105378976	ENST00000644169.1	0	NA	LOC105378976	uncharacterized LOC105378976
chr19	7871668	7872163	496	1.92097	3.14847	0.693438	0.405	Promoter (1-2kb)	19	7869064	7873597	4534	2	80164	ENST00000615988.3	1434	ENSG00000183248	PRR36	proline rich 36
chr9	132581817	132582648	832	1.91957	1.76345	0.917628	0.338101	Promoter (<=1kb)	9	132582606	132590252	7647	1	56751	ENST00000263610.7	0	ENSG00000125492	BARHL1	BarH like homeobox 1
chr19	44844704	44846515	1812	1.91916	3.90362	0.632735	0.426356	Promoter (<=1kb)	19	44846175	44878941	32767	1	5819	ENST00000252485.8	0	ENSG00000130202	NECTIN2	nectin cell adhesion molecule 2
chr2	222318117	222319342	1226	1.91878	1.78731	0.913348	0.339231	Promoter (<=1kb)	2	222318275	222321512	3238	1	440934	ENST00000587192.1	0	ENSG00000237732	CT75	cancer/testis associated transcript 75
chr17	1870153	1872357	2205	1.91846	3.49129	0.6618	0.415928	Promoter (<=1kb)	17	1872127	1879305	7179	1	6117	ENST00000573924.1	0	ENSG00000132383	RPA1	replication protein A1
chr12	107317865	107318860	996	1.91814	4.47031	0.598182	0.439275	Promoter (<=1kb)	12	107318421	107657718	339298	1	121551	ENST00000420571.6	0	ENSG00000151136	BTBD11	BTB domain containing 11
chr22	40258112	40258863	752	1.91772	1.39359	1.01622	0.313421	Intron (ENST00000301923.13/23112, intron 6 of 23)	22	40265003	40321799	56797	1	23112	ENST00000446273.1	-6140	ENSG00000100354	TNRC6B	trinucleotide repeat containing adaptor 6B
chr14	21014442	21015503	1062	1.91772	1.10808	1.12923	0.287942	Promoter (<=1kb)	14	20995944	21014822	18879	2	101929718	ENST00000647921.1	0	ENSG00000258471	LOC101929718	uncharacterized LOC101929718
chr9	132409930	132411705	1776	1.91771	3.37116	0.671339	0.412588	Promoter (<=1kb)	9	132410043	132513406	103364	1	389799	ENST00000393215.7	0	ENSG00000188523	CFAP77	cilia and flagella associated protein 77
chr22	31286180	31287065	886	1.91727	4.24614	0.611114	0.434371	Intron (ENST00000480654.5/113791, intron 2 of 2)	22	31281679	31290726	9048	2	113791	ENST00000493034.1	3661	ENSG00000100100	PIK3IP1	phosphoinositide-3-kinase interacting protein 1
chr11	45922728	45923393	666	1.91669	2.75405	0.739262	0.3899	Promoter (<=1kb)	11	45922778	45929096	6319	1	120071	ENST00000325468.9	0	ENSG00000165905	LARGE2	LARGE xylosyl- and glucuronyltransferase 2
chr2	48448102	48449557	1456	1.91646	2.5663	0.765023	0.381764	Intron (ENST00000431614.5/129285, intron 1 of 20)	2	48441129	48454728	13600	1	129285	ENST00000421486.1	6973	ENSG00000162869	PPP1R21	protein phosphatase 1 regulatory subunit 21
chr4	109754189	109755152	964	1.91561	1.71271	0.909662	0.340207	Intron (ENST00000645635.1/3426, intron 7 of 14)	4	109740694	109762591	21898	2	3426	ENST00000504853.3	7439	ENSG00000205403	CFI	complement factor I
chr1	31057843	31058842	1000	1.91561	1.09898	1.11293	0.29145	Intron (ENST00000424085.6/9698, intron 2 of 17)	1	31059279	31061916	2638	2	9698	ENST00000531867.1	3074	ENSG00000134644	PUM1	pumilio RNA binding family member 1
chr19	8252545	8253568	1024	1.91455	1.17118	1.0953	0.295304	Promoter (2-3kb)	19	8250526	8262418	11893	1	79603	ENST00000557925.1	2019	ENSG00000090661	CERS4	ceramide synthase 4
chr11	118145222	118146249	1028	1.91426	2.92049	0.7154	0.397659	Promoter (<=1kb)	11	118133377	118145433	12057	2	6330	ENST00000415030.6	0	ENSG00000177098	SCN4B	sodium voltage-gated channel beta subunit 4
chr10	32367708	32368764	1057	1.91422	1.93535	0.871244	0.350614	Intron (ENST00000417447.1/102031319, intron 1 of 1)	10	32377113	32378614	1502	2	80314	ENST00000462470.1	9850	ENSG00000120616	EPC1	enhancer of polycomb homolog 1
chr3	12983803	12984953	1151	1.91422	1.61539	0.94807	0.330214	Promoter (2-3kb)	3	12900577	12987036	86460	2	9922	ENST00000618604.4	2083	ENSG00000144711	IQSEC1	IQ motif and Sec7 domain ArfGEF 1
chr21	45086893	45087950	1058	1.91397	1.54362	0.971094	0.324411	Intron (ENST00000462214.5/104, intron 1 of 3)	21	45074600	45226560	151961	1	104	ENST00000496664.5	12293	ENSG00000197381	ADARB1	adenosine deaminase RNA specific B1
chr10	22601106	22602138	1033	1.9136	1.97449	0.868258	0.351441	Intron (ENST00000376573.9/5305, intron 3 of 9)	10	22567537	22609717	42181	2	5305	ENST00000422321.5	7579	ENSG00000150867	PIP4K2A	phosphatidylinositol-5-phosphate 4-kinase type 2 alpha
chr2	23384715	23387062	2348	1.91347	2.71269	0.738608	0.39011	Promoter (<=1kb)	2	23385179	23708606	323428	1	114818	ENST00000486442.6	0	ENSG00000119771	KLHL29	kelch like family member 29
chr19	43784092	43785729	1638	1.91303	2.4476	0.783097	0.376198	Promoter (2-3kb)	19	43766533	43781257	14725	2	3783	ENST00000615047.4	-2835	ENSG00000104783	KCNN4	potassium calcium-activated channel subfamily N member 4
chr20	3209074	3210216	1143	1.91287	2.8234	0.727463	0.39371	Promoter (<=1kb)	20	3209489	3223870	14382	1	3704	ENST00000490838.6	0	ENSG00000125877	ITPA	inosine triphosphatase
chr19	57746432	57747557	1126	1.91181	3.98386	0.623034	0.429925	Promoter (<=1kb)	19	57746815	57758148	11334	1	284309	ENST00000317178.10	0	ENSG00000152443	ZNF776	zinc finger protein 776
chr22	28822613	28823690	1078	1.91159	2.75449	0.734468	0.391441	Intron (ENST00000458080.1/84133, intron 2 of 3)	22	28818331	28822215	3885	1	84133	ENST00000422972.1	4282	ENSG00000183579	ZNRF3	zinc and ring finger 3
chr9	22446520	22448009	1490	1.91129	1.43903	1.00215	0.316795	Promoter (<=1kb)	9	22446824	22455740	8917	1	63951	ENST00000325870.3	0	ENSG00000176399	DMRTA1	DMRT like family A1
chr16	69395694	69396938	1245	1.91097	1.15714	1.09514	0.295337	Intron (ENST00000567841.1/7014, intron 2 of 4)	16	69355567	69386007	30441	2	7014	ENST00000254942.8	-9687	ENSG00000132604	TERF2	telomeric repeat binding factor 2
chr1	16951449	16952264	816	1.91097	1.07971	1.13055	0.287662	Promoter (<=1kb)	1	16953157	16954781	1625	1	9696	ENST00000497654.2	-893	ENSG00000058453	CROCC	ciliary rootlet coiled-coil, rootletin
chr19	55305286	55305917	632	1.91078	1.29982	1.03115	0.309892	Promoter (1-2kb)	19	55304048	55305527	1480	1	84446	ENST00000588584.1	1238	ENSG00000160469	BRSK1	BR serine/threonine kinase 1
chr19	49427924	49428414	491	1.91078	1.18534	1.07571	0.299663	Promoter (2-3kb)	19	49425388	49428987	3600	1	100507003	ENST00000610896.3	2536	ENSG00000261949	GFY	golgi associated olfactory signaling regulator
chr14	100224191	100224599	409	1.91051	1.21127	1.05467	0.304438	Intron (ENST00000554537.1/ENST00000554537.1, intron 1 of 1)	14	100239144	100282788	43645	1	7528	ENST00000262238.10	-14545	ENSG00000100811	YY1	YY1 transcription factor
chr2	97759799	97760188	390	1.91051	1.15709	1.07697	0.299379	Promoter (<=1kb)	2	97758896	97760095	1200	2	23505	ENST00000469447.1	0	ENSG00000075568	TMEM131	transmembrane protein 131
chr19	44093948	44095416	1469	1.91017	3.67817	0.642729	0.422727	Promoter (<=1kb)	19	44094339	44101188	6850	1	7767	ENST00000589680.5	0	ENSG00000267680	ZNF224	zinc finger protein 224
chr19	39497983	39499249	1267	1.90944	2.14923	0.831053	0.361971	Promoter (<=1kb)	19	39498895	39505653	6759	1	10683	ENST00000600437.1	0	ENSG00000090932	DLL3	delta like canonical Notch ligand 3
chr10	5692376	5693296	921	1.90921	2.37812	0.787579	0.374836	Promoter (<=1kb)	10	5692816	5763728	70913	1	54906	ENST00000645567.1	0	ENSG00000108021	TASOR2	transcription activation suppressor family member 2
chr11	63812978	63814278	1301	1.90909	3.01381	0.702426	0.401972	Promoter (<=1kb)	11	63813456	63827716	14261	1	144097	ENST00000294244.9	0	ENSG00000168005	SPINDOC	spindlin interactor and repressor of chromatin binding
chr6	36599697	36600761	1065	1.90888	3.22459	0.67609	0.410939	Promoter (<=1kb)	6	36599438	36602776	3339	1	6428	ENST00000620389.1	259	ENSG00000112081	SRSF3	serine and arginine rich splicing factor 3
chr2	8455478	8458062	2585	1.90799	4.3839	0.597666	0.439472	Intron (ENST00000655671.1/ENST00000655671.1, intron 1 of 6)	2	8321904	8383819	61916	2	339789	ENST00000666457.1	-71659	ENSG00000236790	LINC00299	long intergenic non-protein coding RNA 299
chr2	109128162	109130447	2286	1.90713	2.85012	0.71852	0.396632	Promoter (<=1kb)	2	109127327	109128930	1604	2	100287216	ENST00000567491.1	0	NA	SH3RF3-AS1	SH3RF3 antisense RNA 1
chr19	43934514	43935983	1470	1.90712	3.46538	0.656864	0.417672	Promoter (<=1kb)	19	43912624	43935282	22659	2	7596	ENST00000269973.10	0	ENSG00000124459	ZNF45	zinc finger protein 45
chr16	27242873	27243606	734	1.9069	1.25851	1.04692	0.306221	Intron (ENST00000361439.9/197370, intron 2 of 7)	16	27225172	27233078	7907	2	197370	ENST00000562039.1	-9795	ENSG00000169189	NSMCE1	NSE1 homolog, SMC5-SMC6 complex component
chr15	74889411	74890611	1201	1.90645	3.67308	0.639951	0.423731	Promoter (<=1kb)	15	74890005	74897092	7088	1	4351	ENST00000569931.5	0	ENSG00000178802	MPI	mannose phosphate isomerase
chr11	128868798	128870421	1624	1.9064	3.94659	0.62114	0.430626	Promoter (1-2kb)	11	128838155	128867373	29219	2	3758	ENST00000324036.7	-1425	ENSG00000151704	KCNJ1	potassium inwardly rectifying channel subfamily J member 1
chr18	79516285	79517894	1610	1.90587	2.90737	0.710621	0.39924	Intron (ENST00000253506.9/4772, intron 9 of 9)	18	79523924	79529083	5160	1	4772	ENST00000590172.1	-6030	ENSG00000131196	NFATC1	nuclear factor of activated T cells 1
chr19	51158360	51159019	660	1.90481	1.08398	1.12822	0.288159	Intron (ENST00000600074.1/101928517, intron 2 of 4)	19	51167328	51173524	6197	1	284367	ENST00000618545.4	-8309	ENSG00000171101	SIGLEC17P	sialic acid binding Ig like lectin 17, pseudogene
chr7	139483024	139484240	1217	1.90437	1.0839	1.09677	0.294978	Promoter (<=1kb)	7	139452690	139483673	30984	2	346689	ENST00000340940.5	0	ENSG00000188883	KLRG2	killer cell lectin like receptor G2
chr1	8407586	8409790	2205	1.90427	1.6006	0.948602	0.330079	Intron (ENST00000337907.7/473, intron 13 of 23)	1	8365855	8423419	57565	2	473	ENST00000460659.5	13629	ENSG00000142599	RERE	arginine-glutamic acid dipeptide repeats
chr2	43636722	43637981	1260	1.90376	4.03893	0.614504	0.433099	Promoter (<=1kb)	2	43637260	43767987	130728	1	130271	ENST00000282406.9	0	ENSG00000152527	PLEKHH2	pleckstrin homology, MyTH4 and FERM domain containing H2
chr16	4957758	4958725	968	1.90263	3.96024	0.618493	0.43161	Promoter (<=1kb)	16	4958330	5019157	60828	1	9717	ENST00000251170.12	0	ENSG00000103184	SEC14L5	SEC14 like lipid binding 5
chr1	156295278	156296096	819	1.90247	1.98969	0.855542	0.354992	Promoter (<=1kb)	1	156290541	156295654	5114	2	112770	ENST00000472870.5	0	ENSG00000198715	GLMP	glycosylated lysosomal membrane protein
chr19	18785076	18785954	879	1.90247	1.97534	0.858565	0.354143	Promoter (1-2kb)	19	18786118	18787035	918	2	1311	ENST00000612179.1	1081	ENSG00000105664	COMP	cartilage oligomeric matrix protein
chr3	129689930	129691336	1407	1.90239	1.3689	1.01281	0.314233	Promoter (1-2kb)	3	129647792	129688732	40941	2	23023	ENST00000432054.6	-1198	ENSG00000172765	TMCC1	transmembrane and coiled-coil domain family 1
chr12	110727563	110728938	1376	1.90239	1.20527	1.07399	0.30005	Promoter (<=1kb)	12	110720748	110726679	5932	2	5501	ENST00000553024.1	-884	ENSG00000186298	PPP1CC	protein phosphatase 1 catalytic subunit gamma
chr19	50556288	50556949	662	1.90225	1.26092	1.03836	0.308205	Intron (ENST00000389201.7/94030, intron 1 of 2)	19	50516892	50551042	34151	2	94030	ENST00000599957.5	-5246	ENSG00000131409	LRRC4B	leucine rich repeat containing 4B
chr15	85407431	85408868	1438	1.9012	2.08387	0.838844	0.35973	Intron (ENST00000559362.5/11214, intron 1 of 14)	15	85380756	85521508	140753	1	11214	ENST00000560256.1	26675	ENSG00000170776	AKAP13	A-kinase anchoring protein 13
chr5	138081018	138081935	918	1.90106	1.20703	1.06763	0.301485	Promoter (2-3kb)	5	138083990	138092365	8376	1	7478	ENST00000361560.6	-2055	ENSG00000061492	WNT8A	Wnt family member 8A
chr19	49986978	49987691	714	1.9003	1.7695	0.899317	0.342968	Intron (ENST00000316763.8/51231, intron 12 of 14)	19	49986299	49992910	6612	2	51231	ENST00000593912.5	5219	ENSG00000105053	VRK3	VRK serine/threonine kinase 3
chr19	58002059	58003422	1364	1.9003	3.91102	0.620697	0.430791	Promoter (<=1kb)	19	58002061	58011232	9172	1	100128398	ENST00000550135.5	0	ENSG00000176593	LOC100128398	uncharacterized LOC100128398
chr19	52786049	52787515	1467	1.89987	3.65175	0.637327	0.424683	Promoter (<=1kb)	19	52749942	52786742	36801	2	162966	ENST00000648893.1	0	ENSG00000189190	ZNF600	zinc finger protein 600
chr1	2255241	2256666	1426	1.89937	6.43955	0.500577	0.479249	Intron (ENST00000378536.5/6497, intron 1 of 6)	1	2247996	2303376	55381	1	6497	ENST00000478223.2	7245	ENSG00000157933	SKI	SKI proto-oncogene
chr17	48592686	48594089	1404	1.89887	2.79545	0.719281	0.396382	Promoter (<=1kb)	17	48591257	48593779	2523	2	3215	ENST00000239151.6	0	ENSG00000120075	HOXB5	homeobox B5
chr18	46222467	46224515	2049	1.89881	1.26572	1.04479	0.306713	Intron (ENST00000588730.1/147339, intron 2 of 2)	18	46174086	46232936	58851	1	147339	ENST00000615553.1	48381	ENSG00000152242	C18orf25	chromosome 18 open reading frame 25
chr19	45171096	45172570	1475	1.89825	1.8962	0.872342	0.350311	Intron (ENST00000587566.5/57787, intron 1 of 6)	19	45164725	45178211	13487	2	79090	ENST00000587818.1	5641	ENSG00000007255	TRAPPC6A	trafficking protein particle complex subunit 6A
chr22	40215438	40216652	1215	1.89687	1.88346	0.872418	0.35029	Intron (ENST00000301923.13/23112, intron 4 of 23)	22	40177942	40335808	157867	1	23112	ENST00000335727.13	37496	ENSG00000100354	TNRC6B	trinucleotide repeat containing adaptor 6B
chr2	127641482	127642423	942	1.89687	1.88154	0.864798	0.352402	Promoter (<=1kb)	2	127638381	127642131	3751	2	55679	ENST00000426981.5	0	ENSG00000072163	LIMS2	LIM zinc finger domain containing 2
chr1	94926201	94927656	1456	1.89618	3.70705	0.629545	0.427525	Promoter (<=1kb)	1	94896949	94927223	30275	2	1266	ENST00000394202.8	0	ENSG00000117519	CNN3	calponin 3
chr5	16616271	16618165	1895	1.89484	4.86898	0.563192	0.452979	Promoter (<=1kb)	5	16473053	16616997	143945	2	54463	ENST00000306320.10	0	ENSG00000154153	RETREG1	reticulophagy regulator 1
chr19	57769146	57770401	1256	1.89464	4.14933	0.602898	0.437477	Promoter (<=1kb)	19	57769655	57780614	10960	1	54807	ENST00000391702.3	0	ENSG00000083828	ZNF586	zinc finger protein 586
chr19	17688202	17689135	934	1.89426	1.16234	1.07075	0.30078	Promoter (<=1kb)	19	17601336	17688354	87019	2	23025	ENST00000519716.7	0	ENSG00000130477	UNC13A	unc-13 homolog A
chr12	49043494	49044519	1026	1.89308	1.75554	0.894113	0.344368	Promoter (<=1kb)	12	49043078	49043698	621	2	8085	ENST00000550356.1	0	ENSG00000167548	KMT2D	lysine methyltransferase 2D
chr12	118181699	118182500	802	1.89308	1.33221	1.01524	0.313655	Intron (ENST00000419821.6/51347, intron 14 of 20)	12	118181442	118190522	9081	2	51347	ENST00000540561.5	8022	ENSG00000135090	TAOK3	TAO kinase 3
chr6	24839015	24840143	1129	1.89213	1.70077	0.900762	0.34258	Promoter (2-3kb)	6	24828139	24836050	7912	2	9750	ENST00000463828.1	-2965	ENSG00000111913	RIPOR2	RHO family interacting cell polarization regulator 2
chr1	205343521	205344717	1197	1.89213	1.57133	0.933894	0.333856	Promoter (<=1kb)	1	205339801	205344182	4382	2	55220	ENST00000607826.1	0	ENSG00000162873	KLHDC8A	kelch domain containing 8A
chr8	60865064	60865987	924	1.89213	1.4321	0.974764	0.323498	Promoter (2-3kb)	8	60862531	60865459	2929	1	55636	ENST00000528280.1	2533	ENSG00000171316	CHD7	chromodomain helicase DNA binding protein 7
chr17	78013394	78014280	887	1.89213	1.22359	1.04737	0.306117	Intron (ENST00000636222.1/57690, intron 3 of 22)	17	78005056	78108835	103780	1	57690	ENST00000335749.4	8338	ENSG00000078687	TNRC6C	trinucleotide repeat containing adaptor 6C
chr3	152331443	152332905	1463	1.89213	1.08396	1.10743	0.292644	Intron (ENST00000282486.10/4154, intron 2 of 9)	3	152340527	152340904	378	2	645843	ENST00000408960.4	7999	ENSG00000221962	TMEM14EP	transmembrane protein 14E, pseudogene
chr1	32240219	32241593	1375	1.89203	3.48241	0.645434	0.421752	Promoter (<=1kb)	1	32231658	32240790	9133	2	339483	ENST00000423995.5	0	NA	MTMR9LP	myotubularin related protein 9 like, pseudogene
chr19	11887507	11888447	941	1.89198	2.57422	0.743896	0.388418	Promoter (<=1kb)	19	11887782	11906696	18915	1	7620	ENST00000429654.7	0	ENSG00000198429	ZNF69	zinc finger protein 69
chr17	80991362	80992437	1076	1.89175	3.45497	0.647954	0.420848	Promoter (<=1kb)	17	80991598	80999145	7548	1	79643	ENST00000572525.5	0	ENSG00000176108	CHMP6	charged multivesicular body protein 6
chr20	10673152	10674928	1777	1.89114	3.14698	0.673644	0.411786	Promoter (<=1kb)	20	10637684	10673999	36316	2	182	ENST00000254958.10	0	ENSG00000101384	JAG1	jagged canonical Notch ligand 1
chr17	44384941	44385922	982	1.89079	3.73085	0.625597	0.428978	Promoter (<=1kb)	17	44372180	44385340	13161	2	3674	ENST00000648408.1	0	ENSG00000005961	ITGA2B	integrin subunit alpha 2b
chr1	6419636	6420485	850	1.89056	1.43079	0.962799	0.326486	Promoter (<=1kb)	1	6413000	6419903	6904	2	54626	ENST00000377836.8	0	ENSG00000069812	HES2	hes family bHLH transcription factor 2
chr17	44353520	44354724	1205	1.89037	1.25736	1.03572	0.308823	Promoter (1-2kb)	17	44352202	44353102	901	1	2896	ENST00000586242.1	1318	ENSG00000030582	GRN	granulin precursor
chr11	64971595	64972420	826	1.89027	2.14193	0.812904	0.367266	Promoter (<=1kb)	11	64938230	64972023	33794	2	283129	ENST00000530444.5	0	ENSG00000168070	MAJIN	membrane anchored junction protein
chr8	144019495	144020896	1402	1.89008	3.12214	0.676412	0.410827	Intron (ENST00000377470.8/375686, intron 1 of 4)	8	143985891	144012772	26882	2	84875	ENST00000530478.5	-6723	ENSG00000178685	PARP10	poly(ADP-ribose) polymerase family member 10
chr1	167499256	167500913	1658	1.88957	3.18823	0.667945	0.413771	Intron (ENST00000362089.10/919, intron 1 of 7)	1	167430640	167518529	87890	2	919	ENST00000362089.10	17616	ENSG00000198821	CD247	CD247 molecule
chr19	46633833	46634868	1036	1.88894	4.78434	0.564156	0.452593	Promoter (<=1kb)	19	46634076	46634685	610	2	94235	ENST00000300873.4	0	ENSG00000167414	GNG8	G protein subunit gamma 8
chr5	132813277	132814498	1222	1.88888	1.78636	0.881958	0.347669	Promoter (<=1kb)	5	132813302	132816786	3485	1	134548	ENST00000378693.4	0	ENSG00000198944	SOWAHA	sosondowah ankyrin repeat domain family member A
chr20	58850655	58851524	870	1.88888	1.65974	0.912514	0.339451	Promoter (<=1kb)	20	58818919	58850903	31985	2	149775	ENST00000424094.6	0	ENSG00000235590	GNAS-AS1	GNAS antisense RNA 1
chr19	44051203	44052357	1155	1.88843	1.97313	0.849293	0.356755	Promoter (<=1kb)	19	44051367	44060788	9422	1	7766	ENST00000588518.1	0	ENSG00000178386	ZNF223	zinc finger protein 223
chr19	56566983	56568037	1055	1.88805	3.59246	0.634133	0.425846	Promoter (<=1kb)	19	56545566	56567411	21846	2	112268241	ENST00000596587.1	0	NA	ZNF470-DT	ZNF470 divergent transcript
chr14	105414678	105415638	961	1.88769	3.00877	0.687574	0.406993	Intron (ENST00000548638.5/9112, intron 2 of 5)	14	105417833	105419071	1239	2	100507437	ENST00000653291.1	3433	ENSG00000251602	LOC100507437	uncharacterized LOC100507437
chr17	2244355	2245413	1059	1.88675	1.15942	1.06532	0.302007	Promoter (<=1kb)	17	2172802	2244912	72111	2	23293	ENST00000570659.5	0	ENSG00000070366	SMG6	SMG6 nonsense mediated mRNA decay factor
chr19	37594124	37595461	1338	1.88425	5.32598	0.53582	0.464172	Promoter (<=1kb)	19	37594830	37613387	18558	1	163255	ENST00000589117.5	0	ENSG00000171817	ZNF540	zinc finger protein 540
chr22	28441942	28443160	1219	1.88421	1.95104	0.840515	0.359252	Promoter (<=1kb)	22	28296214	28443073	146860	2	23331	ENST00000490475.1	0	ENSG00000100154	TTC28	tetratricopeptide repeat domain 28
chr2	177783786	177784917	1132	1.88421	1.3104	1.01069	0.31474	Intron (ENST00000286063.11/50940, intron 9 of 19)	2	177698490	177723289	24800	1	105373764	ENST00000450227.1	85296	ENSG00000229941	PDE11A-AS1	PDE11A antisense RNA 1
chr17	4215098	4216094	997	1.88421	1.25182	1.03234	0.309613	Intron (ENST00000341657.9/51479, intron 4 of 24)	17	4195455	4208132	12678	2	51479	ENST00000573250.2	-6966	ENSG00000185722	ANKFY1	ankyrin repeat and FYVE domain containing 1
chr17	67407385	67408347	963	1.88421	1.19303	1.05546	0.304256	Intron (ENST00000581322.6/26207, intron 1 of 8)	17	67378966	67578225	199260	1	26207	ENST00000584471.5	28419	ENSG00000154217	PITPNC1	phosphatidylinositol transfer protein cytoplasmic 1
chr16	27268040	27269356	1317	1.88365	2.95477	0.691437	0.405679	Promoter (<=1kb)	16	27224994	27268772	43779	2	197370	ENST00000361439.9	0	ENSG00000169189	NSMCE1	NSE1 homolog, SMC5-SMC6 complex component
chr19	49422306	49423110	805	1.88322	1.64665	0.911246	0.339787	Promoter (<=1kb)	19	49422419	49423441	1023	2	113091	ENST00000270631.2	331	ENSG00000142538	PTH2	parathyroid hormone 2
chr5	131312115	131313259	1145	1.88295	2.99268	0.685018	0.407867	Intron (ENST00000502840.5/56990, intron 2 of 3)	5	131264075	131394690	130616	1	56990	ENST00000360515.7	48040	ENSG00000158985	CDC42SE2	CDC42 small effector 2
chr17	82257004	82258129	1126	1.88238	1.80798	0.873442	0.350007	Promoter (1-2kb)	17	82249578	82255546	5969	2	1453	ENST00000578904.1	-1458	ENSG00000141551	CSNK1D	casein kinase 1 delta
chr4	57110028	57111237	1210	1.88238	1.55049	0.937921	0.332816	Promoter (<=1kb)	4	57030773	57110385	79613	2	3490	ENST00000295666.6	0	ENSG00000163453	IGFBP7	insulin like growth factor binding protein 7
chr6	28080000	28081639	1640	1.88182	5.38823	0.531753	0.465873	Promoter (<=1kb)	6	28080568	28089563	8996	1	7718	ENST00000377325.2	0	ENSG00000197279	ZNF165	zinc finger protein 165
chr16	50337703	50339492	1790	1.88174	3.63009	0.628919	0.427755	Intron (ENST00000394688.8/29117, intron 6 of 16)	16	50315947	50320377	4431	2	29117	ENST00000569774.6	-17326	ENSG00000166164	BRD7	bromodomain containing 7
chr16	396947	397580	634	1.88101	2.0046	0.832507	0.361551	Promoter (<=1kb)	16	397192	400753	3562	1	4833	ENST00000620944.4	0	ENSG00000103202	NME4	NME/NM23 nucleoside diphosphate kinase 4
chr19	57613729	57614802	1074	1.88065	2.84033	0.702093	0.402084	Promoter (<=1kb)	19	57614233	57620447	6215	1	7693	ENST00000597975.1	0	ENSG00000213762	ZNF134	zinc finger protein 134
chr5	178075851	178076729	879	1.88045	2.10494	0.813484	0.367095	Intron (ENST00000651413.2/653316, intron 14 of 14)	5	178053872	178055559	1688	1	653316	ENST00000515878.1	21979	ENSG00000204677	FAM153CP	protein FAM153C
chr19	2477961	2479463	1503	1.87898	5.4751	0.525851	0.468359	Promoter (1-2kb)	19	2476356	2477126	771	1	4616	ENST00000593043.1	1605	ENSG00000099860	GADD45B	growth arrest and DNA damage inducible beta
chr6	45450557	45451290	734	1.87896	1.34982	0.990077	0.319727	Intron (ENST00000483377.5/860, intron 4 of 7)	6	45422577	45547305	124729	1	860	ENST00000625924.1	27980	ENSG00000124813	RUNX2	RUNX family transcription factor 2
chr1	27332393	27333346	954	1.87896	1.29914	1.00747	0.315513	Promoter (<=1kb)	1	27332346	27336399	4054	1	84065	ENST00000471456.1	47	ENSG00000186501	TMEM222	transmembrane protein 222
chr7	150736948	150738845	1898	1.87891	3.31566	0.651307	0.419648	Promoter (<=1kb)	7	150737418	150743646	6229	1	55340	ENST00000358647.5	0	ENSG00000196329	GIMAP5	GTPase, IMAP family member 5
chr9	127927016	127928140	1125	1.8787	3.87732	0.608728	0.435269	Promoter (<=1kb)	9	127921529	127927491	5963	2	138429	ENST00000300432.3	0	ENSG00000167103	PIP5KL1	phosphatidylinositol-4-phosphate 5-kinase like 1
chr1	151398764	151400121	1358	1.87861	4.66793	0.565144	0.452197	Promoter (<=1kb)	1	151399560	151401052	1493	1	5692	ENST00000495288.5	0	ENSG00000159377	PSMB4	proteasome 20S subunit beta 4
chr1	226655160	226655596	437	1.87835	1.82752	0.862705	0.352986	Intron (ENST00000272117.7/3707, intron 1 of 6)	1	226656640	226659670	3031	2	100506443	ENST00000443422.1	4074	NA	ITPKB-IT1	ITPKB intronic transcript 1
chr2	240622742	240623866	1125	1.87808	1.97139	0.842033	0.358819	Promoter (1-2kb)	2	240625245	240630882	5638	1	2859	ENST00000407714.1	-1379	ENSG00000178623	GPR35	G protein-coupled receptor 35
chr16	1151943	1153095	1153	1.87731	3.05745	0.672537	0.412171	Promoter (<=1kb)	16	1153106	1221768	68663	1	8912	ENST00000348261.11	-11	ENSG00000196557	CACNA1H	calcium voltage-gated channel subunit alpha1 H
chr20	32109234	32110269	1036	1.87724	4.80141	0.557093	0.455436	Promoter (<=1kb)	20	32109714	32167256	57543	1	9777	ENST00000398022.7	0	ENSG00000101337	TM9SF4	transmembrane 9 superfamily member 4
chr15	82709281	82710204	924	1.87698	3.07897	0.67231	0.41225	Promoter (<=1kb)	15	82659281	82709875	50595	2	8120	ENST00000535359.6	0	ENSG00000103723	AP3B2	adaptor related protein complex 3 subunit beta 2
chr14	50812928	50814401	1474	1.87664	2.02395	0.82535	0.363623	Intron (ENST00000530997.7/51199, intron 3 of 30)	14	50792712	50806818	14107	2	51199	ENST00000674061.1	-6110	ENSG00000100503	NIN	ninein
chr19	52941757	52943168	1412	1.87651	4.60221	0.567331	0.451324	Promoter (<=1kb)	19	52927135	52942601	15467	2	399669	ENST00000313956.4	0	ENSG00000213801	ZNF321P	zinc finger protein 321, pseudogene
chr18	48409476	48410745	1270	1.87582	2.0403	0.823975	0.364023	Promoter (<=1kb)	18	48041052	48410752	369701	2	201501	ENST00000588149.5	7	ENSG00000184828	ZBTB7C	zinc finger and BTB domain containing 7C
chr2	27391128	27392349	1222	1.87576	3.27783	0.652088	0.41937	Promoter (1-2kb)	2	27392784	27393367	584	2	2498	ENST00000394290.3	1018	NA	FTH1P3	ferritin heavy chain 1 pseudogene 3
chr2	101570518	101571503	986	1.87541	2.24477	0.78634	0.375212	Promoter (2-3kb)	2	101551592	101567901	16310	2	105373514	ENST00000651956.1	-2617	ENSG00000286101	LOC105373514	uncharacterized LOC105373514
chr19	16828816	16829869	1054	1.87464	2.64025	0.723398	0.395034	Promoter (<=1kb)	19	16829398	16880349	50952	1	23309	ENST00000248054.10	0	ENSG00000127511	SIN3B	SIN3 transcription regulator family member B
chr8	100451492	100452773	1282	1.87456	3.64771	0.622618	0.430078	Intron (ENST00000664475.1/ENST00000664475.1, intron 1 of 1)	8	100475670	100501148	25479	1	105375670	ENST00000665530.1	-22897	NA	LOC105375670	uncharacterized LOC105375670
chr16	89387863	89388451	589	1.87453	1.07011	1.0592	0.303401	Intron (ENST00000378330.7/29123, intron 3 of 13)	16	89287651	89373485	85835	2	29123	ENST00000642333.1	-14378	ENSG00000167522	ANKRD11	ankyrin repeat domain 11
chr17	42760637	42761595	959	1.87371	1.01951	1.09888	0.294516	Promoter (<=1kb)	17	42753914	42761103	7190	2	100190938	ENST00000592670.5	0	ENSG00000197291	RAMP2-AS1	RAMP2 antisense RNA 1
chr16	81778810	81780051	1242	1.8731	3.17281	0.66022	0.416485	Promoter (<=1kb)	16	81779291	81962685	183395	1	5336	ENST00000564138.6	0	ENSG00000197943	PLCG2	phospholipase C gamma 2
chr19	6475897	6476637	741	1.87305	1.26417	1.0121	0.314404	Promoter (<=1kb)	19	6467207	6476246	9040	2	79958	ENST00000590444.5	0	ENSG00000205744	DENND1C	DENN domain containing 1C
chr20	4949631	4950458	828	1.87305	1.0461	1.10325	0.293556	Intron (ENST00000379333.5/9962, intron 2 of 16)	20	4859367	4899647	40281	2	9962	ENST00000423430.1	-49984	ENSG00000089057	SLC23A2	solute carrier family 23 member 2
chr17	74859865	74861030	1166	1.8729	1.66369	0.89485	0.344169	Promoter (<=1kb)	17	74842023	74859885	17863	2	2905	ENST00000293190.10	0	ENSG00000161509	GRIN2C	glutamate ionotropic receptor NMDA type subunit 2C
chr19	14485866	14487109	1244	1.8729	1.21	1.03561	0.308848	Promoter (2-3kb)	19	14482857	14483445	589	2	10755	ENST00000591245.1	-2421	ENSG00000123159	GIPC1	GIPC PDZ domain containing family member 1
chr2	105777407	105778042	636	1.87278	1.64142	0.902344	0.342157	Intron (ENST00000233154.9/8440, intron 1 of 4)	2	105745731	105881534	135804	1	8440	ENST00000393348.6	31676	ENSG00000071051	NCK2	NCK adaptor protein 2
chr16	90046958	90048951	1994	1.87267	1.96336	0.830997	0.361987	Promoter (<=1kb)	16	90039761	90047625	7865	2	100130015	ENST00000409873.5	0	ENSG00000222019	URAHP	urate (hydroxyiso-) hydrolase, pseudogene
chr17	49394810	49395556	747	1.87267	1.57435	0.921537	0.337075	Intron (ENST00000576461.1/102724596, intron 2 of 2)	17	49405068	49407473	2406	2	5245	ENST00000511933.1	11917	ENSG00000167085	PHB	prohibitin
chr19	58346992	58348164	1173	1.87245	4.11186	0.592162	0.441587	Promoter (<=1kb)	19	58345178	58347634	2457	2	1	ENST00000596924.1	0	ENSG00000121410	A1BG	alpha-1-B glycoprotein
chr1	167482114	167483249	1136	1.87244	2.73457	0.704283	0.401351	Intron (ENST00000362089.10/919, intron 1 of 7)	1	167455195	167458646	3452	1	101928512	ENST00000660512.1	26919	NA	LOC101928512	uncharacterized LOC101928512
chr8	66033277	66034268	992	1.87244	1.94746	0.83768	0.360064	Intron (ENST00000276570.10/85479, intron 1 of 5)	8	66043477	66076829	33353	1	85479	ENST00000522619.1	-9209	ENSG00000147570	DNAJC5B	DnaJ heat shock protein family (Hsp40) member C5 beta
chr2	170820429	170821344	916	1.87237	2.17743	0.793875	0.372934	Promoter (<=1kb)	2	170821718	170829620	7903	1	2571	ENST00000485013.1	-374	ENSG00000128683	GAD1	glutamate decarboxylase 1
chr6	3226910	3229807	2898	1.87189	3.04168	0.672273	0.412263	Promoter (<=1kb)	6	3223324	3227262	3939	2	347733	ENST00000681707.1	0	ENSG00000137285	TUBB2B	tubulin beta 2B class IIb
chr11	65506291	65508656	2366	1.87061	5.96336	0.500279	0.47938	Promoter (<=1kb)	11	65506117	65506173	57	1	109136578	ENST00000611300.1	174	ENSG00000274072	MASCRNA	MALAT1-associated small cytoplasmic RNA
chr7	101153868	101155273	1406	1.87008	3.08446	0.667084	0.414072	Promoter (<=1kb)	7	101154456	101160533	6078	1	1174	ENST00000646950.1	0	ENSG00000106367	AP1S1	adaptor related protein complex 1 subunit sigma 1
chr17	44707872	44709247	1376	1.86915	2.33298	0.766803	0.381211	Promoter (<=1kb)	17	44708608	44752264	43657	1	80174	ENST00000393547.6	0	ENSG00000161692	DBF4B	DBF4 zinc finger B
chr16	165090	166671	1582	1.86677	1.59542	0.904618	0.341549	Promoter (<=1kb)	16	165978	166764	787	1	3042	ENST00000356815.4	0	ENSG00000206177	HBM	hemoglobin subunit mu
chr2	64113934	64115157	1224	1.86677	1.34811	0.977472	0.322827	Intron (ENST00000358912.5/57162, intron 1 of 6)	2	64143239	64252832	109594	1	100507006	ENST00000438115.7	-28082	NA	LOC100507006	uncharacterized LOC100507006
chr14	74608856	74609621	766	1.86661	3.1542	0.657048	0.417606	Promoter (2-3kb)	14	74500732	74612072	111341	2	4053	ENST00000556690.5	2451	ENSG00000119681	LTBP2	latent transforming growth factor beta binding protein 2
chr12	1804089	1805250	1162	1.86624	2.19661	0.788853	0.37445	Intron (ENST00000668721.1/105369602, intron 1 of 2)	12	1800862	1807486	6625	1	105369602	ENST00000668721.1	3227	NA	LOC105369602	uncharacterized LOC105369602
chr14	105168598	105169366	769	1.86624	2.03032	0.820356	0.365079	Promoter (<=1kb)	14	105140982	105168824	27843	2	3714	ENST00000347004.2	0	ENSG00000184916	JAG2	jagged canonical Notch ligand 2
chr7	26193982	26195600	1619	1.86524	4.17377	0.583903	0.444789	Intron (ENST00000679318.1/3181, intron 7 of 11)	7	26189666	26200142	10477	2	3181	ENST00000677075.1	4542	ENSG00000122566	HNRNPA2B1	heterogeneous nuclear ribonucleoprotein A2/B1
chr3	71454211	71456917	2707	1.86523	3.11204	0.660978	0.416217	Intron (ENST00000649528.3/27086, intron 3 of 20)	3	71318202	71469567	151366	2	27086	ENST00000649145.1	12650	ENSG00000114861	FOXP1	forkhead box P1
chr17	5196872	5197934	1063	1.86518	1.84456	0.855927	0.354884	Intron (ENST00000669386.1/100130950, intron 1 of 5)	17	5192104	5235643	43540	1	100130950	ENST00000571689.1	4768	ENSG00000261879	ZNF594-DT	ZNF594 divergent transcript
chr13	114151565	114151998	434	1.86485	1.60662	0.911615	0.339689	Promoter (2-3kb)	13	114154691	114179420	24730	1	101929355	ENST00000643687.1	-2693	ENSG00000283361	CFAP97D2	CFAP97 domain containing 2
chr7	43636945	43638073	1129	1.86241	1.74405	0.869491	0.351099	Intron (ENST00000648544.1/9263, intron 8 of 8)	7	43639257	43642164	2908	2	55744	ENST00000488813.1	4091	ENSG00000106603	COA1	cytochrome c oxidase assembly factor 1
chr19	12757375	12758089	715	1.86241	1.28621	1.0003	0.317241	Promoter (1-2kb)	19	12755859	12756706	848	1	54831	ENST00000552539.1	1516	ENSG00000039987	BEST2	bestrophin 2
chr12	12376635	12377225	591	1.86178	1.94412	0.831888	0.36173	Intron (ENST00000314565.9/118426, intron 2 of 3)	12	12357418	12465844	108427	1	118426	ENST00000298571.6	19217	ENSG00000165714	BORCS5	BLOC-1 related complex subunit 5
chr11	128866852	128867595	744	1.86169	2.47294	0.729958	0.392899	Promoter (<=1kb)	11	128836315	128867296	30982	2	3758	ENST00000392665.6	0	ENSG00000151704	KCNJ1	potassium inwardly rectifying channel subfamily J member 1
chr19	7482777	7483590	814	1.86169	1.65944	0.887147	0.346255	Promoter (<=1kb)	19	7476894	7483312	6419	2	92960	ENST00000599519.1	0	ENSG00000104883	PEX11G	peroxisomal biogenesis factor 11 gamma
chr1	35451005	35452345	1341	1.86169	1.62084	0.896653	0.343684	Promoter (<=1kb)	1	35443262	35450006	6745	2	79932	ENST00000473844.1	-999	ENSG00000142687	KIAA0319L	KIAA0319 like
chr4	137531970	137533386	1417	1.86169	1.04141	1.09812	0.294682	Promoter (<=1kb)	4	137518918	137532494	13577	2	54510	ENST00000344876.9	0	ENSG00000189184	PCDH18	protocadherin 18
chr9	134067868	134069073	1206	1.86151	5.32347	0.524024	0.469132	Promoter (<=1kb)	9	134030305	134068026	37722	2	8019	ENST00000303407.12	0	ENSG00000169925	BRD3	bromodomain containing 3
chr12	79689035	79691325	2291	1.86146	2.61325	0.717696	0.396903	Promoter (<=1kb)	12	79690144	79778451	88308	1	105369864	ENST00000551995.1	0	NA	PPP1R12A-AS2	PPP1R12A antisense RNA 2
chr4	1309320	1309843	524	1.86084	1.70552	0.873162	0.350084	Promoter (<=1kb)	4	1309443	1339384	29942	1	10296	ENST00000510794.5	0	ENSG00000090316	MAEA	macrophage erythroblast attacher, E3 ubiquitin ligase
chr14	77052859	77053654	796	1.86084	1.33185	0.977878	0.322726	Intron (ENST00000500215.3/283575, intron 1 of 3)	14	77041064	77069503	28440	1	283575	ENST00000500215.3	11795	ENSG00000246548	LINC02288	long intergenic non-protein coding RNA 2288
chr12	50517490	50518186	697	1.86084	1.32536	0.980039	0.322192	Intron (ENST00000549620.5/57609, intron 1 of 7)	12	50504985	50748657	243673	1	57609	ENST00000301180.10	12505	ENSG00000066084	DIP2B	disco interacting protein 2 homolog B
chr7	43699551	43700958	1408	1.86006	1.7233	0.876764	0.349092	Intron (ENST00000415076.6/55744, intron 1 of 6)	7	43646297	43729474	83178	2	55744	ENST00000451651.5	28516	ENSG00000106603	COA1	cytochrome c oxidase assembly factor 1
chr17	39800264	39801146	883	1.85982	1.25131	1.00208	0.316812	Intron (ENST00000346872.8/22806, intron 3 of 7)	17	39765496	39778225	12730	2	22806	ENST00000583368.1	-22039	ENSG00000161405	IKZF3	IKAROS family zinc finger 3
chr14	72516828	72517305	478	1.85982	1.0332	1.0924	0.295942	Promoter (<=1kb)	14	72516820	72516898	79	1	102465832	ENST00000622274.1	8	ENSG00000273830	MIR7843	microRNA 7843
chr2	10863895	10865578	1684	1.85966	2.11121	0.798825	0.371448	Intron (ENST00000670239.1/101929733, intron 1 of 2)	2	10869278	10885118	15841	1	101929733	ENST00000652896.1	-3700	ENSG00000271952	LINC01954	long intergenic non-protein coding RNA 1954
chr6	157033260	157035010	1751	1.85966	2.04674	0.811005	0.367826	Promoter (1-2kb)	6	157036315	157208683	172369	1	57492	ENST00000637904.1	-1305	ENSG00000049618	ARID1B	AT-rich interaction domain 1B
chr20	49935569	49937166	1598	1.8592	4.45079	0.565763	0.45195	Promoter (<=1kb)	20	49936336	49952152	15817	1	55905	ENST00000623528.3	0	ENSG00000124226	RNF114	ring finger protein 114
chr17	42322493	42323602	1110	1.85896	2.6709	0.707586	0.400249	Promoter (1-2kb)	17	42323035	42325061	2027	2	6774	ENST00000471989.5	1459	ENSG00000168610	STAT3	signal transducer and activator of transcription 3
chr9	136409637	136411242	1606	1.85894	3.90903	0.595948	0.44013	Promoter (<=1kb)	9	136401922	136410614	8693	2	10807	ENST00000357365.8	0	ENSG00000165689	ENTR1	endosome associated trafficking regulator 1
chr15	40769182	40770036	855	1.85852	2.22143	0.772019	0.379596	Promoter (<=1kb)	15	40769980	40772449	2470	1	643338	ENST00000344320.8	0	ENSG00000188277	C15orf62	chromosome 15 open reading frame 62
chr19	2019488	2019997	510	1.85852	1.70206	0.877963	0.348763	Intron (ENST00000590646.5/107985278, intron 2 of 4)	19	1985448	2015714	30267	2	55643	ENST00000255608.9	-3774	ENSG00000133243	BTBD2	BTB domain containing 2
chr11	18332321	18333534	1214	1.85781	1.94469	0.827922	0.362877	Promoter (<=1kb)	11	18332662	18341608	8947	1	2965	ENST00000543932.5	0	ENSG00000110768	GTF2H1	general transcription factor IIH subunit 1
chr17	7262720	7263764	1045	1.85758	1.87314	0.837051	0.360244	Promoter (<=1kb)	17	7259904	7262945	3042	2	1366	ENST00000538261.7	0	ENSG00000181885	CLDN7	claudin 7
chr19	44207038	44207855	818	1.85737	2.11448	0.797028	0.371986	Promoter (<=1kb)	19	44207547	44213237	5691	1	7770	ENST00000590871.1	0	ENSG00000131115	ZNF227	zinc finger protein 227
chr1	149390060	149390976	917	1.8572	3.7103	0.606464	0.436125	Promoter (<=1kb)	1	149390614	149464200	73587	1	100996717	ENST00000650865.1	0	ENSG00000286219	NOTCH2NLC	notch 2 N-terminal like C
chr18	2932117	2933237	1121	1.85706	1.84601	0.847465	0.357273	Intron (ENST00000261596.8/9663, intron 8 of 19)	18	2945550	2946534	985	2	727896	ENST00000582850.1	13297	NA	CHORDC1P4	CHORDC1 pseudogene 4
chr8	47734969	47735400	432	1.85706	1.05772	1.0692	0.301128	Promoter (2-3kb)	8	47732559	47735327	2769	1	23514	ENST00000588781.1	2410	ENSG00000164808	SPIDR	scaffold protein involved in DNA repair
chr14	104688735	104690172	1438	1.85666	3.248	0.640818	0.423417	Promoter (<=1kb)	14	104689606	104722535	32930	1	64423	ENST00000330634.11	0	ENSG00000203485	INF2	inverted formin 2
chr8	30103705	30104257	553	1.85649	2.13153	0.784104	0.375892	Promoter (1-2kb)	8	30101940	30105087	3148	1	23484	ENST00000519466.1	1765	ENSG00000104660	LEPROTL1	leptin receptor overlapping transcript like 1
chr15	74994736	74996044	1309	1.85532	2.19496	0.781026	0.37683	Promoter (<=1kb)	15	74995542	75017925	22384	1	192683	ENST00000562327.5	0	ENSG00000198794	SCAMP5	secretory carrier membrane protein 5
chr10	11319394	11320942	1549	1.85527	1.48533	0.933897	0.333855	Promoter (<=1kb)	10	11316833	11319884	3052	2	414196	ENST00000379256.4	0	ENSG00000181800	CELF2-AS1	CELF2 antisense RNA 1
chr1	23167564	23169663	2100	1.85515	4.05157	0.585203	0.444282	Promoter (<=1kb)	1	23084023	23168858	84836	2	7798	ENST00000418342.5	0	ENSG00000169641	LUZP1	leucine zipper protein 1
chr17	43937997	43938772	776	1.85511	1.0053	1.0814	0.298389	Promoter (<=1kb)	17	43938363	43938959	597	1	107546764	ENST00000565120.1	0	ENSG00000261514	LINC01976	long intergenic non-protein coding RNA 1976
chr10	69237281	69238224	944	1.85371	1.19625	1.01773	0.313061	Intron (ENST00000354624.6/80201, intron 4 of 17)	10	69215333	69232490	17158	2	101928994	ENST00000450995.1	-4791	ENSG00000229261	LOC101928994	uncharacterized LOC101928994
chr1	247110912	247112392	1481	1.85354	2.2845	0.76038	0.383212	Promoter (<=1kb)	1	247110160	247112417	2258	2	388759	ENST00000623686.1	25	ENSG00000221953	LINC02897	long intergenic non-protein coding RNA 2897
chr22	39310505	39311735	1231	1.85344	3.6095	0.609884	0.434834	Promoter (1-2kb)	22	39312884	39313705	822	2	6122	ENST00000464182.5	1970	ENSG00000100316	RPL3	ribosomal protein L3
chr20	46117827	46119186	1360	1.85318	3.07803	0.656109	0.41794	Promoter (<=1kb)	20	46118278	46129659	11382	1	958	ENST00000620709.4	0	ENSG00000101017	CD40	CD40 molecule
chr20	57350947	57351827	881	1.8528	3.61842	0.610985	0.43442	Promoter (<=1kb)	20	57351223	57379211	27989	1	8480	ENST00000371242.6	0	ENSG00000101146	RAE1	ribonucleic acid export 1
chr19	45427587	45428796	1210	1.85214	2.77845	0.690547	0.405981	Promoter (<=1kb)	19	45420324	45429210	8887	2	2067	ENST00000589214.1	414	ENSG00000012061	ERCC1	ERCC excision repair 1, endonuclease non-catalytic subunit
chr22	18528084	18529357	1274	1.85188	3.72382	0.589526	0.442605	Promoter (<=1kb)	22	18528947	18530222	1276	1	728229	ENST00000620199.4	0	ENSG00000278558	TMEM191B	transmembrane protein 191B
chr2	26298710	26300339	1630	1.85167	2.98986	0.663979	0.415161	Promoter (<=1kb)	2	26299914	26306332	6419	1	105374334	ENST00000661577.1	0	NA	LOC105374334	uncharacterized LOC105374334
chr6	25026868	25028087	1220	1.85134	3.89267	0.592208	0.441569	Intron (ENST00000510784.8/9750, intron 1 of 13)	6	24839359	25042018	202660	2	9750	ENST00000510784.8	13931	ENSG00000111913	RIPOR2	RHO family interacting cell polarization regulator 2
chr20	43666485	43667574	1090	1.85125	3.45756	0.62167	0.43043	Promoter (<=1kb)	20	43667019	43716495	49477	1	4605	ENST00000396863.8	0	ENSG00000101057	MYBL2	MYB proto-oncogene like 2
chr2	27663174	27664394	1221	1.8511	4.61013	0.552654	0.457238	Promoter (<=1kb)	2	27663471	27694969	31499	1	22950	ENST00000326019.10	0	ENSG00000163798	SLC4A1AP	solute carrier family 4 member 1 adaptor protein
chr17	48816720	48817683	964	1.85088	3.59011	0.61076	0.434504	Promoter (<=1kb)	17	48762234	48817229	54996	2	284076	ENST00000393382.8	0	ENSG00000170703	TTLL6	tubulin tyrosine ligase like 6
chr15	75738237	75739268	1032	1.85071	4.68386	0.548427	0.458963	Promoter (<=1kb)	15	75727670	75738623	10954	2	100128285	ENST00000501931.1	0	NA	DNM1P35	dynamin 1 pseudogene 35
chr17	76239499	76241315	1817	1.85005	3.43449	0.622937	0.42996	Promoter (<=1kb)	17	76142465	76240289	97825	2	114804	ENST00000647930.1	0	ENSG00000141576	RNF157	ring finger protein 157
chr1	226690321	226691793	1473	1.84964	3.67095	0.602637	0.437576	Intron (ENST00000272117.7/3707, intron 1 of 6)	1	226656680	226675067	18388	2	100506443	ENST00000412918.1	-15254	NA	ITPKB-IT1	ITPKB intronic transcript 1
chr17	18697734	18698419	686	1.84963	1.32457	0.959259	0.327377	Promoter (<=1kb)	17	18697998	18735667	37670	1	147166	ENST00000572555.5	0	ENSG00000108448	TRIM16L	tripartite motif containing 16 like
chr2	27494985	27495583	599	1.84963	1.1149	1.03777	0.308343	Promoter (<=1kb)	2	27491883	27495200	3318	2	64838	ENST00000264703.4	0	ENSG00000115226	FNDC4	fibronectin type III domain containing 4
chr10	72134844	72135886	1043	1.84963	1.09647	1.04577	0.306485	Promoter (<=1kb)	10	72096522	72134463	37942	2	51008	ENST00000534259.1	-381	ENSG00000138303	ASCC1	activating signal cointegrator 1 complex subunit 1
chr6	34425292	34426866	1575	1.8493	3.91627	0.58958	0.442584	Promoter (<=1kb)	6	34286969	34426046	139078	2	100529239	ENST00000639877.1	0	ENSG00000270800	RPS10-NUDT3	RPS10-NUDT3 readthrough
chr17	42670064	42671073	1010	1.84922	2.75975	0.691126	0.405784	Promoter (<=1kb)	17	42667914	42669698	1785	2	79990	ENST00000591476.5	-366	ENSG00000068137	PLEKHH3	pleckstrin homology, MyTH4 and FERM domain containing H3
chr17	68237090	68239041	1952	1.84861	3.91688	0.589319	0.442685	Intron (ENST00000674770.2/51321, intron 1 of 7)	17	68247930	68251178	3249	1	51321	ENST00000580548.5	-8889	ENSG00000196704	AMZ2	archaelysin family metallopeptidase 2
chr16	48630130	48630878	749	1.84855	1.62616	0.88688	0.346327	Intron (ENST00000568150.3/105371240, intron 1 of 3)	16	48623462	48676752	53291	1	105371240	ENST00000565072.1	6668	NA	LOC105371240	uncharacterized LOC105371240
chr1	27430616	27431421	806	1.84793	1.38748	0.946293	0.330668	Intron (ENST00000618852.5/10163, intron 1 of 8)	1	27392622	27395814	3193	1	2827	ENST00000374024.4	37994	ENSG00000181773	GPR3	G protein-coupled receptor 3
chr16	2686938	2687332	395	1.84793	1.15218	1.03052	0.310039	Promoter (1-2kb)	16	2685614	2696032	10419	1	54442	ENST00000569689.1	1324	ENSG00000167977	KCTD5	potassium channel tetramerization domain containing 5
chr12	51269548	51270998	1451	1.84789	3.95479	0.586538	0.443763	Promoter (<=1kb)	12	51244558	51270415	25858	2	57228	ENST00000603798.6	0	ENSG00000170545	SMAGP	small cell adhesion glycoprotein
chr1	226643232	226645032	1801	1.84686	2.95035	0.663774	0.415233	Intron (ENST00000272117.7/3707, intron 3 of 6)	1	226656640	226659670	3031	2	100506443	ENST00000443422.1	14638	NA	ITPKB-IT1	ITPKB intronic transcript 1
chr12	12379577	12380660	1084	1.84661	4.04393	0.581035	0.445909	Intron (ENST00000314565.9/118426, intron 2 of 3)	12	12357418	12465844	108427	1	118426	ENST00000298571.6	22159	ENSG00000165714	BORCS5	BLOC-1 related complex subunit 5
chr5	892092	893311	1220	1.8464	4.06049	0.579655	0.44645	Promoter (<=1kb)	5	863741	892800	29060	2	65980	ENST00000495265.5	0	ENSG00000028310	BRD9	bromodomain containing 9
chr3	44509678	44511341	1664	1.84636	3.89208	0.589235	0.442718	Promoter (<=1kb)	3	44498970	44510636	11667	2	285346	ENST00000436261.6	0	ENSG00000178917	ZNF852	zinc finger protein 852
chr16	3503445	3503835	391	1.84504	2.07186	0.793242	0.373124	Promoter (1-2kb)	16	3502044	3508464	6421	1	23059	ENST00000576117.1	1401	ENSG00000103351	CLUAP1	clusterin associated protein 1
chr19	6718253	6719321	1069	1.84504	1.8178	0.845094	0.357947	Promoter (1-2kb)	19	6677704	6720650	42947	2	718	ENST00000245907.11	1329	ENSG00000125730	C3	complement C3
chr19	912644	913653	1010	1.8448	3.62887	0.605127	0.436631	Promoter (<=1kb)	19	896503	913219	16717	2	91300	ENST00000361574.10	0	ENSG00000198858	R3HDM4	R3H domain containing 4
chr12	113056286	113057725	1440	1.84468	2.46222	0.727023	0.393852	Promoter (<=1kb)	12	113056709	113058152	1444	1	1840	ENST00000548759.1	0	ENSG00000135144	DTX1	deltex E3 ubiquitin ligase 1
chr1	156600721	156602086	1366	1.84418	3.47238	0.616042	0.432524	Promoter (<=1kb)	1	156594301	156601479	7179	2	54865	ENST00000368232.9	0	ENSG00000160818	GPATCH4	G-patch domain containing 4
chr5	56829120	56830319	1200	1.84395	2.13275	0.778848	0.377496	Intron (ENST00000399503.4/4214, intron 1 of 19)	5	56815549	56896152	80604	1	4214	ENST00000399503.4	13571	ENSG00000095015	MAP3K1	mitogen-activated protein kinase kinase kinase 1
chr17	42963846	42965042	1197	1.84345	3.63301	0.603728	0.437161	Promoter (<=1kb)	17	42950526	42964454	13929	2	80755	ENST00000427569.7	0	ENSG00000266967	AARSD1	alanyl-tRNA synthetase domain containing 1
chr19	57559102	57560264	1163	1.84329	3.38175	0.621837	0.430368	Promoter (<=1kb)	19	57535257	57559812	24556	2	162972	ENST00000601415.5	0	ENSG00000251369	ZNF550	zinc finger protein 550
chr4	154743478	154744233	756	1.84309	1.15083	1.00243	0.316727	Promoter (<=1kb)	4	154744000	154753118	9119	1	9227	ENST00000510733.1	0	ENSG00000121207	LRAT	lecithin retinol acyltransferase
chr11	66222190	66223248	1059	1.84254	3.34594	0.624337	0.429443	Promoter (1-2kb)	11	66220670	66221643	974	1	55690	ENST00000534273.1	1520	ENSG00000175115	PACS1	phosphofurin acidic cluster sorting protein 1
chr2	64101176	64102494	1319	1.84248	1.50701	0.907023	0.340909	Intron (ENST00000358912.5/57162, intron 3 of 6)	2	64143239	64252832	109594	1	100507006	ENST00000438115.7	-40745	NA	LOC100507006	uncharacterized LOC100507006
chr6	122788980	122790967	1988	1.84248	1.19703	1.00788	0.315415	Promoter (<=1kb)	6	122789049	122809717	20669	1	10924	ENST00000539041.5	0	ENSG00000172594	SMPDL3A	sphingomyelin phosphodiesterase acid like 3A
chr1	6209140	6209818	679	1.84233	1.81247	0.83703	0.36025	Promoter (<=1kb)	1	6192930	6209389	16460	2	107985733	ENST00000465335.1	0	NA	LOC107985733	uncharacterized LOC107985733
chr19	50679104	50679779	676	1.84233	1.65812	0.872417	0.35029	Intron (ENST00000293441.6/50944, intron 21 of 23)	19	50661827	50689404	27578	2	50944	ENST00000391813.5	9625	ENSG00000161681	SHANK1	SH3 and multiple ankyrin repeat domains 1
chr1	203277498	203278344	847	1.84233	1.54643	0.900935	0.342534	Intron (ENST00000666545.1/100506775, intron 1 of 3)	1	203282421	203288804	6384	1	100506775	ENST00000657300.1	-4077	NA	LINC01353	long intergenic non-protein coding RNA 1353
chr12	55707491	55708830	1340	1.84222	2.26174	0.753605	0.38534	Promoter (<=1kb)	12	55684568	55707904	23337	2	3679	ENST00000257879.11	0	ENSG00000135424	ITGA7	integrin subunit alpha 7
chr3	71050159	71051277	1119	1.84208	2.37427	0.738065	0.390284	Intron (ENST00000649528.3/27086, intron 9 of 20)	3	70986911	71047077	60167	2	27086	ENST00000649417.1	-3082	ENSG00000114861	FOXP1	forkhead box P1
chr10	80407905	80409070	1166	1.84113	3.33781	0.624125	0.429521	Promoter (<=1kb)	10	80408486	80432996	24511	1	84293	ENST00000615554.4	0	ENSG00000122378	PRXL2A	peroxiredoxin like 2A
chr16	89434986	89436314	1329	1.84045	1.87824	0.825669	0.363531	Intron (ENST00000657156.1/101927817, intron 1 of 4)	16	89430988	89453678	22691	1	101927817	ENST00000657156.1	3998	NA	LOC101927817	uncharacterized LOC101927817
chr1	47230881	47232465	1585	1.83967	1.41483	0.928	0.335386	Promoter (<=1kb)	1	47216290	47231715	15426	2	6886	ENST00000371884.6	0	ENSG00000162367	TAL1	TAL bHLH transcription factor 1, erythroid differentiation factor
chr7	4882951	4884161	1211	1.83965	3.02903	0.650318	0.420001	Promoter (<=1kb)	7	4797055	4883654	86600	2	55698	ENST00000445392.5	0	ENSG00000157927	RADIL	Rap associating with DIL domain
chr22	25563913	25564867	955	1.83922	2.43944	0.725719	0.394277	Promoter (<=1kb)	22	25561117	25564715	3599	2	100996404	ENST00000668059.1	0	ENSG00000234884	GRK3-AS1	GRK3 antisense RNA 1
chr3	71010489	71011772	1284	1.83913	3.5229	0.608617	0.435311	Intron (ENST00000649528.3/27086, intron 12 of 20)	3	70959206	71005336	46131	2	27086	ENST00000647741.1	-5153	ENSG00000114861	FOXP1	forkhead box P1
chr1	161209600	161210373	774	1.83911	1.04691	1.0516	0.305143	Promoter (2-3kb)	1	161207353	161214353	7001	1	4720	ENST00000468828.6	2247	ENSG00000158864	NDUFS2	NADH:ubiquinone oxidoreductase core subunit S2
chr3	157146579	157148248	1670	1.83892	2.17053	0.769212	0.380464	Promoter (1-2kb)	3	157148949	157149633	685	2	57018	ENST00000467849.1	1385	ENSG00000163660	CCNL1	cyclin L1
chr17	19063370	19064618	1249	1.83839	3.85386	0.58535	0.444225	Promoter (<=1kb)	17	19063346	19064136	791	2	780852	ENST00000571722.3	0	NA	SNORD3B-2	small nucleolar RNA, C/D box 3B-2
chr19	12400382	12401635	1254	1.83832	3.54169	0.607202	0.435845	Promoter (<=1kb)	19	12379189	12401274	22086	2	90576	ENST00000435033.1	0	ENSG00000196466	ZNF799	zinc finger protein 799
chr7	26187230	26189135	1906	1.83817	4.19677	0.566091	0.451819	Intron (ENST00000679318.1/3181, intron 10 of 11)	7	26178003	26183874	5872	1	9603	ENST00000607375.1	9227	ENSG00000050344	NFE2L3	nuclear factor, erythroid 2 like 3
chr4	80797687	80798996	1310	1.83809	1.48907	0.879844	0.348247	Intron (ENST00000358105.8/255119, intron 3 of 5)	4	80870049	80963697	93649	1	255119	ENST00000508314.1	-71053	ENSG00000197826	CFAP299	cilia and flagella associated protein 299
chr20	63498585	63499703	1119	1.83801	2.1826	0.768488	0.380688	Promoter (<=1kb)	20	63488013	63499239	11227	2	1917	ENST00000675519.1	0	ENSG00000101210	EEF1A2	eukaryotic translation elongation factor 1 alpha 2
chr9	129988904	129989526	623	1.83732	1.41278	0.930144	0.334828	Intron (ENST00000446176.7/23048, intron 2 of 16)	9	129895268	129994867	99600	2	23048	ENST00000449089.6	5341	ENSG00000187239	FNBP1	formin binding protein 1
chr21	45596664	45597126	463	1.83732	1.38075	0.939832	0.332324	Promoter (1-2kb)	21	45595294	45597048	1755	1	105372840	ENST00000662558.1	1370	ENSG00000233922	LINC01694	long intergenic non-protein coding RNA 1694
chr14	67666713	67667824	1112	1.83732	1.37115	0.942842	0.331551	Intron (ENST00000554659.6/10490, intron 1 of 5)	14	67656480	67660194	3715	2	10490	ENST00000553619.1	-6519	ENSG00000100568	VTI1B	vesicle transport through interaction with t-SNAREs 1B
chr6	42044148	42044609	462	1.83711	3.14933	0.637926	0.424465	Intron (ENST00000616010.4/896, intron 1 of 4)	6	41936855	42048676	111822	2	896	ENST00000505672.5	4067	ENSG00000112576	CCND3	cyclin D3
chr1	110068183	110070167	1985	1.83707	2.26981	0.749629	0.386596	Promoter (<=1kb)	1	110059870	110070672	10803	2	257	ENST00000647563.2	505	ENSG00000156150	ALX3	ALX homeobox 3
chr19	40090180	40091379	1200	1.83653	4.17229	0.567319	0.451328	Promoter (<=1kb)	19	40048757	40090925	42169	2	284323	ENST00000595508.1	0	ENSG00000197782	ZNF780A	zinc finger protein 780A
chr2	6913642	6914148	507	1.83638	2.26656	0.747625	0.387232	Promoter (<=1kb)	2	6912318	6914412	2095	2	386597	ENST00000668217.1	264	ENSG00000228203	GRASLND	glycosaminoglycan regulatory associated long non-coding RNA
chr20	53622918	53624165	1248	1.83638	1.44955	0.925384	0.336068	Intron (ENST00000444112.1/105372672, intron 2 of 2)	20	53582925	53609907	26983	2	7764	ENST00000540425.1	-13011	ENSG00000171940	ZNF217	zinc finger protein 217
chr2	100818809	100820510	1702	1.83625	1.51331	0.893353	0.344573	Promoter (<=1kb)	2	100820139	100996829	176691	1	4862	ENST00000335681.10	0	ENSG00000170485	NPAS2	neuronal PAS domain protein 2
chr17	3737619	3739107	1489	1.8361	2.83851	0.671197	0.412637	Promoter (<=1kb)	17	3724318	3738953	14636	2	3682	ENST00000571185.1	0	ENSG00000083457	ITGAE	integrin subunit alpha E
chr12	118120361	118121416	1056	1.8358	1.71683	0.858922	0.354043	Promoter (<=1kb)	12	118114350	118121117	6768	2	101928274	ENST00000321694.5	0	NA	LOC101928274	uncharacterized LOC101928274
chr17	74972169	74973210	1042	1.8354	3.26752	0.624853	0.429252	Promoter (<=1kb)	17	74950742	74972759	22018	2	283987	ENST00000425042.7	0	ENSG00000167861	HID1	HID1 domain containing
chr16	79770176	79771085	910	1.8345	2.30902	0.74455	0.38821	Promoter (<=1kb)	16	79770379	79807922	37544	1	101928248	ENST00000667006.1	0	ENSG00000260876	LINC01229	long intergenic non-protein coding RNA 1229
chr1	154501670	154502643	974	1.83448	1.12661	1.00569	0.315941	Promoter (<=1kb)	1	154502219	154548147	45929	1	126668	ENST00000368482.8	0	ENSG00000163239	TDRD10	tudor domain containing 10
chr19	12052264	12053371	1108	1.8341	1.45896	0.910809	0.339903	Promoter (<=1kb)	19	12017888	12052967	35080	2	729747	ENST00000547473.1	0	ENSG00000257446	ZNF878	zinc finger protein 878
chr9	137638885	137640143	1259	1.83381	1.55435	0.896593	0.3437	Intron (ENST00000637510.1/92714, intron 1 of 1)	9	137646377	137711004	64628	1	79813	ENST00000636376.1	-6234	ENSG00000181090	EHMT1	euchromatic histone lysine methyltransferase 1
chr17	35539022	35541498	2477	1.8338	3.52158	0.606485	0.436117	Promoter (1-2kb)	17	35474904	35537861	62958	2	100506736	ENST00000651507.1	-1161	ENSG00000205045	SLFN12L	schlafen family member 12 like
chr16	68093626	68094693	1068	1.83368	2.48979	0.715633	0.397583	Intron (ENST00000548144.1/4775, intron 2 of 2)	16	68088701	68226934	138234	1	4775	ENST00000535127.2	4925	ENSG00000072736	NFATC3	nuclear factor of activated T cells 3
chr13	40596397	40597333	937	1.83278	1.88232	0.819965	0.365193	Intron (ENST00000636651.2/2308, intron 1 of 3)	13	40469955	40611127	141173	2	2308	ENST00000636651.2	13794	ENSG00000150907	FOXO1	forkhead box O1
chr9	89477216	89478436	1221	1.83266	3.5923	0.599279	0.438856	Promoter (1-2kb)	9	89361979	89479890	117912	2	10507	ENST00000429836.5	1454	ENSG00000187764	SEMA4D	semaphorin 4D
chr1	146401035	146401855	821	1.83242	1.1278	1.0271	0.310843	Promoter (<=1kb)	1	146321214	146401647	80434	2	102724364	ENST00000643391.1	0	NA	SEC22B4P	SEC22 homolog B4, pseudogene
chr12	116060440	116061352	913	1.83242	1.09263	1.04233	0.307284	Intron (ENST00000281928.9/23389, intron 4 of 30)	12	115959364	116096911	137548	2	23389	ENST00000648737.1	35559	ENSG00000123066	MED13L	mediator complex subunit 13L
chr9	127954873	127956154	1282	1.83168	3.11525	0.636581	0.424954	Intron (ENST00000373095.6/399665, intron 1 of 10)	9	127940883	127950722	9840	2	399665	ENST00000300434.3	-4151	ENSG00000167106	FAM102A	family with sequence similarity 102 member A
chr3	172595484	172596648	1165	1.83168	2.4571	0.720347	0.396033	Promoter (<=1kb)	3	172560901	172595607	34707	2	105374219	ENST00000424941.2	0	ENSG00000223387	LINC02068	long intergenic non-protein coding RNA 2068
chr14	24006959	24007818	860	1.83157	2.30994	0.738177	0.390248	Promoter (<=1kb)	14	24007185	24027782	20598	1	728635	ENST00000658653.1	0	ENSG00000284807	DHRS4L1	dehydrogenase/reductase 4 like 1
chr2	65435931	65437179	1249	1.83156	2.85438	0.667293	0.413999	Promoter (<=1kb)	2	65436711	66072621	635911	1	105369168	ENST00000606978.5	0	NA	LOC105369168	uncharacterized LOC105369168
chr16	1331576	1334140	2565	1.8315	3.86917	0.581542	0.445711	Promoter (<=1kb)	16	1333638	1339386	5749	1	8938	ENST00000565665.5	0	ENSG00000007516	BAIAP3	BAI1 associated protein 3
chr15	45187455	45188844	1390	1.83136	3.38018	0.613576	0.433447	Promoter (<=1kb)	15	45167214	45187956	20743	2	90525	ENST00000560540.5	0	ENSG00000138606	SHF	Src homology 2 domain containing F
chr19	50475912	50477039	1128	1.83125	4.2136	0.562161	0.453393	Promoter (<=1kb)	19	50466788	50476271	9484	2	112703	ENST00000602178.5	0	ENSG00000142530	FAM71E1	family with sequence similarity 71 member E1
chr7	130982130	130983061	932	1.83082	2.62653	0.69393	0.404833	Promoter (1-2kb)	7	130944168	130984109	39942	2	378805	ENST00000443623.5	1048	ENSG00000231721	LINC-PINT	long intergenic non-protein coding RNA, p53 induced transcript
chr9	97938073	97939043	971	1.83041	2.03235	0.790436	0.373971	Promoter (<=1kb)	9	97926791	97938172	11382	2	55363	ENST00000616898.2	0	ENSG00000136929	HEMGN	hemogen
chr1	1540085	1540885	801	1.83021	1.47449	0.899547	0.342906	Promoter (<=1kb)	1	1534778	1540624	5847	2	339453	ENST00000378733.9	0	ENSG00000205090	TMEM240	transmembrane protein 240
chr19	14195842	14196676	835	1.83021	1.00167	1.06953	0.301054	Intron (ENST00000340736.10/22859, intron 1 of 23)	19	14149953	14206169	56217	2	22859	ENST00000361434.7	9493	ENSG00000072071	ADGRL1	adhesion G protein-coupled receptor L1
chr20	45910580	45911952	1373	1.82858	4.2144	0.560683	0.453988	Promoter (<=1kb)	20	45898760	45910937	12178	2	5360	ENST00000372420.5	0	ENSG00000100979	PLTP	phospholipid transfer protein
chr18	7566597	7568329	1733	1.82846	2.936	0.65496	0.418347	Promoter (<=1kb)	18	7566782	8406861	840080	1	5797	ENST00000332175.12	0	ENSG00000173482	PTPRM	protein tyrosine phosphatase receptor type M
chr2	189580207	189581662	1456	1.82837	4.1253	0.565143	0.452198	Promoter (<=1kb)	2	189560590	189580786	20197	2	30061	ENST00000261024.7	0	ENSG00000138449	SLC40A1	solute carrier family 40 member 1
chr14	98135672	98136530	859	1.82829	1.46293	0.880765	0.347995	Promoter (<=1kb)	14	98136074	98139242	3169	1	105370652	ENST00000557072.1	0	NA	LINC02295	long intergenic non-protein coding RNA 2295
chr21	33931014	33932505	1492	1.82786	5.21201	0.511139	0.474648	Promoter (<=1kb)	21	33931160	33977691	46532	1	100506334	ENST00000427447.5	0	ENSG00000237945	LINC00649	long intergenic non-protein coding RNA 649
chr17	4888668	4889530	863	1.82778	1.50016	0.89749	0.343459	Promoter (2-3kb)	17	4892471	4893650	1180	1	50488	ENST00000572629.1	-2941	ENSG00000141503	MINK1	misshapen like kinase 1
chr19	13093764	13094399	636	1.82761	1.8981	0.811785	0.367596	Intron (ENST00000592199.6/4784, intron 10 of 10)	19	13099033	13102858	3826	2	4066	ENST00000264824.5	8459	ENSG00000104903	LYL1	LYL1 basic helix-loop-helix family member
chr2	111897651	111899565	1915	1.82748	2.97454	0.64953	0.420283	Promoter (<=1kb)	2	111898607	112029561	130955	1	10461	ENST00000295408.9	0	ENSG00000153208	MERTK	MER proto-oncogene, tyrosine kinase
chr1	24555646	24556449	804	1.82659	1.05765	1.02901	0.310394	Promoter (<=1kb)	1	24538802	24556024	17223	2	100506985	ENST00000577528.1	0	NA	NCMAP-DT	NCMAP divergent transcript
chr22	41822346	41823368	1023	1.8262	1.5938	0.875505	0.349439	Intron (ENST00000402061.7/79879, intron 3 of 3)	22	41833079	41907307	74229	1	6721	ENST00000612482.4	-9711	ENSG00000198911	SREBF2	sterol regulatory element binding transcription factor 2
chr21	36976943	36977748	806	1.82561	1.37873	0.93773	0.332865	Promoter (2-3kb)	21	36937168	36980628	43461	2	3141	ENST00000448340.5	2880	ENSG00000159267	HLCS	holocarboxylase synthetase
chr2	238234209	238234820	612	1.82519	2.8571	0.662057	0.415837	Promoter (2-3kb)	2	238225138	238231699	6562	2	151174	ENST00000659231.1	-2510	ENSG00000186235	LINC02610	long intergenic non-protein coding RNA 2610
chr18	63131057	63132233	1177	1.8251	1.75321	0.840001	0.359399	Intron (ENST00000677635.1/596, intron 1 of 1)	18	63123346	63138411	15066	2	596	ENST00000677635.1	6178	ENSG00000171791	BCL2	BCL2 apoptosis regulator
chr6	35370047	35371269	1223	1.82455	1.07474	1.03457	0.309092	Intron (ENST00000360694.8/5467, intron 2 of 7)	6	35342614	35428178	85565	1	5467	ENST00000311565.4	27433	ENSG00000112033	PPARD	peroxisome proliferator activated receptor delta
chr12	92210041	92210517	477	1.82455	1.0371	1.05015	0.305475	Intron (ENST00000665784.1/101928617, intron 2 of 3)	12	92146202	92226557	80356	1	101928617	ENST00000654992.1	63839	NA	BTG1-DT	BTG1 divergent transcript
chr13	112942589	112943811	1223	1.82414	3.66665	0.589303	0.442691	Intron (ENST00000375608.7/23263, intron 2 of 29)	13	112968500	113099739	131240	1	23263	ENST00000397030.5	-24689	ENSG00000126217	MCF2L	MCF.2 cell line derived transforming sequence like
chr18	9707545	9708966	1422	1.82389	1.29896	0.951991	0.329216	Promoter (<=1kb)	18	9708275	9859469	151195	1	11031	ENST00000578734.5	0	ENSG00000168461	RAB31	RAB31, member RAS oncogene family
chr18	2985414	2986051	638	1.82389	1.21069	0.983327	0.321382	Promoter (2-3kb)	18	2954516	2982873	28358	2	9663	ENST00000584915.1	-2541	ENSG00000101577	LPIN2	lipin 2
chr16	2681893	2683158	1266	1.82298	4.56068	0.539515	0.462636	Promoter (<=1kb)	16	2660349	2682369	22021	2	100507321	ENST00000663379.1	0	NA	ERVK13-1	endogenous retrovirus group K13 member 1
chr11	720770	722267	1498	1.82259	2.8007	0.666179	0.414389	Promoter (<=1kb)	11	720972	721631	660	1	64787	ENST00000531471.1	0	ENSG00000177106	EPS8L2	EPS8 like 2
chr14	65281972	65283089	1118	1.82229	1.36771	0.938396	0.332694	Intron (ENST00000555736.1/ENST00000555736.1, intron 1 of 3)	14	65335117	65335183	67	2	100616176	ENST00000584635.1	52094	ENSG00000266740	MIR4708	microRNA 4708
chr2	99180620	99181574	955	1.82086	4.1615	0.559145	0.454607	Promoter (<=1kb)	2	99161947	99180927	18981	2	129531	ENST00000422537.6	0	ENSG00000158411	MITD1	microtubule interacting and trafficking domain containing 1
chr20	45405874	45407590	1717	1.82023	3.21368	0.62077	0.430764	Promoter (<=1kb)	20	45377197	45405994	28798	2	27296	ENST00000488588.1	0	ENSG00000124251	TP53TG5	TP53 target 5
chr1	26993188	26994282	1095	1.82019	3.21207	0.621029	0.430667	Promoter (<=1kb)	1	26993692	27000886	7195	1	388610	ENST00000522111.3	0	ENSG00000253368	TRNP1	TMF1 regulated nuclear protein 1
chr19	44212066	44213153	1088	1.81968	3.70847	0.58447	0.444568	Promoter (<=1kb)	19	44212528	44237267	24740	1	7770	ENST00000391961.6	0	ENSG00000131115	ZNF227	zinc finger protein 227
chr14	74875777	74876549	773	1.81928	1.1288	1.0014	0.316975	Promoter (<=1kb)	14	74852871	74876154	23284	2	283571	ENST00000673765.1	0	ENSG00000119608	PROX2	prospero homeobox 2
chr10	69449748	69450412	665	1.81913	1.73588	0.834815	0.360887	Promoter (1-2kb)	10	69451465	69507666	56202	1	23555	ENST00000373290.7	-1053	ENSG00000099282	TSPAN15	tetraspanin 15
chr11	68036837	68037377	541	1.81911	1.75828	0.831541	0.36183	Promoter (<=1kb)	11	68036029	68036644	616	1	4728	ENST00000531282.1	808	ENSG00000110717	NDUFS8	NADH:ubiquinone oxidoreductase core subunit S8
chr19	11848224	11849423	1200	1.81899	3.23383	0.616962	0.432181	Promoter (<=1kb)	19	11848726	11869486	20761	1	90594	ENST00000682736.1	0	ENSG00000171291	ZNF439	zinc finger protein 439
chr20	58659996	58662341	2346	1.81898	3.15951	0.624738	0.429295	Intron (ENST00000361830.7/8675, intron 2 of 8)	20	58667520	58676486	8967	1	8675	ENST00000438253.1	-5179	ENSG00000124222	STX16	syntaxin 16
chr17	8210063	8211254	1192	1.81895	3.26326	0.616515	0.432348	Promoter (<=1kb)	17	8204733	8210582	5850	2	9212	ENST00000316199.10	0	ENSG00000178999	AURKB	aurora kinase B
chr12	121917924	121918992	1069	1.81799	3.89048	0.571804	0.449545	Promoter (<=1kb)	12	121918592	121972069	53478	1	144406	ENST00000397454.2	0	ENSG00000158023	CFAP251	cilia and flagella associated protein 251
chr12	46209382	46211150	1769	1.81775	3.32603	0.61026	0.434692	Intron (ENST00000398637.10/81539, intron 5 of 16)	12	46197378	46198021	644	2	81539	ENST00000548979.1	-11361	ENSG00000111371	SLC38A1	solute carrier family 38 member 1
chr3	98531289	98532891	1603	1.81755	2.22419	0.749434	0.386658	Promoter (<=1kb)	3	98531978	98534681	2704	1	2838	ENST00000284311.5	0	ENSG00000154165	GPR15	G protein-coupled receptor 15
chr10	101066564	101068277	1714	1.81732	2.81976	0.660717	0.416309	Promoter (<=1kb)	10	101066299	101068131	1833	1	81621	ENST00000465807.1	265	ENSG00000107821	KAZALD1	Kazal type serine peptidase inhibitor domain 1
chr17	76191375	76192688	1314	1.81714	4.46516	0.540992	0.462024	Intron (ENST00000647930.1/114804, intron 2 of 18)	17	76162761	76167082	4322	2	114804	ENST00000591615.1	-24293	ENSG00000141576	RNF157	ring finger protein 157
chr17	50129168	50130674	1507	1.81655	3.31656	0.610276	0.434686	Promoter (<=1kb)	17	50110040	50130160	20121	2	201191	ENST00000330175.9	0	ENSG00000167100	SAMD14	sterile alpha motif domain containing 14
chr10	27744241	27745027	787	1.81622	2.27389	0.733601	0.391721	Promoter (<=1kb)	10	27744786	27767794	23009	1	101929202	ENST00000419777.1	0	NA	MKX-AS1	MKX antisense RNA 1
chr20	36733329	36734196	868	1.81581	2.95855	0.643894	0.422307	Intron (ENST00000373803.6/57446, intron 1 of 16)	20	36652375	36721787	69413	2	57446	ENST00000373773.7	-11542	ENSG00000101079	NDRG3	NDRG family member 3
chr11	105202348	105203338	991	1.81577	1.30443	0.951568	0.329324	Intron (ENST00000649856.1/105369468, intron 4 of 7)	11	105137714	105139769	2056	2	59082	ENST00000530950.2	-62579	ENSG00000255501	CARD18	caspase recruitment domain family member 18
chr17	30116341	30117707	1367	1.81529	4.21039	0.553347	0.456956	Promoter (<=1kb)	17	30117079	30117172	94	2	100423003	ENST00000586878.1	0	ENSG00000284399	MIR3184	microRNA 3184
chr22	40217637	40218477	841	1.81515	1.93833	0.787566	0.37484	Intron (ENST00000301923.13/23112, intron 4 of 23)	22	40177942	40335808	157867	1	23112	ENST00000335727.13	39695	ENSG00000100354	TNRC6B	trinucleotide repeat containing adaptor 6B
chr19	46840145	46841310	1166	1.81515	1.48053	0.893094	0.344643	Promoter (<=1kb)	19	46838446	46839656	1211	2	1175	ENST00000598027.1	-489	ENSG00000042753	AP2S1	adaptor related protein complex 2 subunit sigma 1
chr19	7595353	7596721	1369	1.81515	1.44366	0.903539	0.341838	Promoter (<=1kb)	19	7595863	7618304	22442	1	57662	ENST00000160298.9	0	ENSG00000076826	CAMSAP3	calmodulin regulated spectrin associated protein family member 3
chr9	15293712	15294586	875	1.81474	1.83833	0.805132	0.369566	Intron (ENST00000512701.6/158219, intron 1 of 19)	9	15249042	15307209	58168	2	158219	ENST00000506891.1	12623	ENSG00000155158	TTC39B	tetratricopeptide repeat domain 39B
chr4	37453081	37454086	1006	1.81474	1.69577	0.836053	0.360531	Promoter (<=1kb)	4	37453925	37593510	139586	1	55286	ENST00000381980.9	0	ENSG00000154274	C4orf19	chromosome 4 open reading frame 19
chr1	167489017	167490044	1028	1.81464	2.99845	0.636635	0.424934	Intron (ENST00000362089.10/919, intron 1 of 7)	1	167430640	167518529	87890	2	919	ENST00000362089.10	28485	ENSG00000198821	CD247	CD247 molecule
chr1	148279860	148281113	1254	1.81412	2.26664	0.734925	0.391294	Promoter (<=1kb)	1	148271884	148280749	8866	2	105371226	ENST00000428035.1	0	NA	LINC01731	long intergenic non-protein coding RNA 1731
chr19	17245334	17246713	1380	1.81393	3.57509	0.589739	0.442522	Promoter (<=1kb)	19	17231883	17245919	14037	2	2063	ENST00000291442.4	0	ENSG00000160113	NR2F6	nuclear receptor subfamily 2 group F member 6
chr13	99269384	99270757	1374	1.81381	2.06725	0.768831	0.380582	Intron (ENST00000355700.9/337867, intron 2 of 4)	13	99258305	99261744	3440	2	2841	ENST00000678933.1	-7640	ENSG00000125245	GPR18	G protein-coupled receptor 18
chr19	53431423	53432586	1164	1.81336	4.69949	0.527025	0.467863	Promoter (<=1kb)	19	53431984	53444670	12687	1	147804	ENST00000424846.3	0	ENSG00000241015	TPM3P9	tropomyosin 3 pseudogene 9
chr14	23351997	23353306	1310	1.81304	2.13354	0.754673	0.385004	Promoter (<=1kb)	14	23346306	23352741	6436	2	51310	ENST00000354772.9	0	ENSG00000092096	SLC22A17	solute carrier family 22 member 17
chr16	1534973	1535971	999	1.81256	2.29858	0.725002	0.394511	Promoter (1-2kb)	16	1533666	1555568	21903	1	79652	ENST00000566264.2	1307	ENSG00000131634	TMEM204	transmembrane protein 204
chr15	68794841	68795915	1075	1.81256	2.05895	0.766298	0.381367	Promoter (2-3kb)	15	68780072	68792248	12177	2	8125	ENST00000483551.6	-2593	ENSG00000140350	ANP32A	acidic nuclear phosphoprotein 32 family member A
chr10	95841637	95842478	842	1.81133	1.21058	0.976319	0.323112	Promoter (2-3kb)	10	95844575	95846220	1646	1	953	ENST00000422161.2	-2097	ENSG00000138185	ENTPD1	ectonucleoside triphosphate diphosphohydrolase 1
chr9	107489580	107490611	1032	1.8113	2.12711	0.756434	0.38445	Promoter (<=1kb)	9	107484852	107489769	4918	2	9314	ENST00000374672.5	0	ENSG00000136826	KLF4	Kruppel like factor 4
chr14	24171348	24172616	1269	1.81108	4.31278	0.544738	0.460478	Promoter (<=1kb)	14	24171853	24180257	8405	1	9985	ENST00000620473.4	0	ENSG00000100918	REC8	REC8 meiotic recombination protein
chr7	6530713	6531848	1136	1.81052	2.15398	0.743133	0.388662	Promoter (<=1kb)	7	6497727	6531186	33460	2	392862	ENST00000435185.5	0	ENSG00000215045	GRID2IP	Grid2 interacting protein
chr17	8410050	8410880	831	1.81052	1.38123	0.915313	0.338711	Promoter (2-3kb)	17	8413131	8448597	35467	1	81565	ENST00000582812.5	-2251	ENSG00000166579	NDEL1	nudE neurodevelopment protein 1 like 1
chr1	25109404	25110291	888	1.81052	1.17875	0.984575	0.321075	Intron (ENST00000424084.1/ENST00000424084.1, intron 1 of 2)	1	25041136	25047404	6269	1	105376879	ENST00000648363.1	68268	ENSG00000285823	LINC02793	long intergenic non-protein coding RNA 2793
chr7	100894992	100897542	2551	1.81045	3.22188	0.613304	0.433549	Promoter (<=1kb)	7	100889994	100895886	5893	2	43	ENST00000419336.6	0	ENSG00000087085	ACHE	acetylcholinesterase (Cartwright blood group)
chr11	111539508	111541591	2084	1.80951	1.90112	0.785985	0.37532	Promoter (<=1kb)	11	111540280	111555212	14933	1	143903	ENST00000533999.5	0	ENSG00000204381	LAYN	layilin
chr16	81841538	81844058	2521	1.80906	2.67023	0.673599	0.411802	Promoter (<=1kb)	16	81842720	81869277	26558	1	5336	ENST00000569523.1	0	ENSG00000197943	PLCG2	phospholipase C gamma 2
chr19	35509172	35510794	1623	1.80898	2.48538	0.698574	0.403266	Promoter (<=1kb)	19	35497220	35510211	12992	2	93099	ENST00000434389.5	0	ENSG00000161249	DMKN	dermokine
chr19	7862125	7863373	1249	1.80837	3.16446	0.61732	0.432047	Promoter (1-2kb)	19	7860585	7863567	2983	1	115704	ENST00000601766.1	1540	ENSG00000142459	EVI5L	ecotropic viral integration site 5 like
chr10	24894068	24895318	1251	1.8074	1.76839	0.821859	0.36464	Intron (ENST00000320152.11/56952, intron 3 of 8)	10	24952350	25161236	208887	1	101929025	ENST00000648191.1	-57032	ENSG00000231422	LINC01516	long intergenic non-protein coding RNA 1516
chr3	71415487	71417362	1876	1.8073	3.01155	0.633369	0.426124	Intron (ENST00000649528.3/27086, intron 3 of 20)	3	71198210	71391564	193355	2	27086	ENST00000648944.1	-23923	ENSG00000114861	FOXP1	forkhead box P1
chr12	122965978	122967213	1236	1.80666	4.51833	0.532553	0.465538	Promoter (<=1kb)	12	122920951	122966460	45510	2	23457	ENST00000344275.11	0	ENSG00000150967	ABCB9	ATP binding cassette subfamily B member 9
chr10	123132783	123133597	815	1.8065	2.07363	0.759395	0.383521	Promoter (2-3kb)	10	123135970	123139423	3454	1	340784	ENST00000357878.7	-2373	ENSG00000188620	HMX3	H6 family homeobox 3
chr1	148361349	148362744	1396	1.80582	2.48786	0.695127	0.404429	Promoter (<=1kb)	1	148362370	148362533	164	2	101954273	ENST00000384610.1	0	ENSG00000207340	RNVU1-1	RNA, variant U1 small nuclear 1
chr10	17655210	17656810	1601	1.80582	2.24117	0.733996	0.391594	Intron (ENST00000377524.8/8027, intron 1 of 13)	10	17644208	17700221	56014	1	8027	ENST00000377500.1	11002	ENSG00000136738	STAM	signal transducing adaptor molecule
chr9	14991980	14994584	2605	1.80486	2.63994	0.674396	0.411526	Promoter (<=1kb)	9	14921013	14993195	72183	2	105375980	ENST00000652129.1	0	NA	LOC105375980	uncharacterized LOC105375980
chr13	50130408	50131332	925	1.80474	2.86132	0.648097	0.420796	Intron (ENST00000486895.5/10301, intron 1 of 1)	13	50027133	50125720	98588	2	8847	ENST00000425586.5	-4688	ENSG00000231607	DLEU2	deleted in lymphocytic leukemia 2
chr10	101843314	101844172	859	1.80421	2.90498	0.641259	0.423258	Promoter (<=1kb)	10	101825974	101843800	17827	2	30819	ENST00000356640.7	0	ENSG00000120049	KCNIP2	potassium voltage-gated channel interacting protein 2
chr6	36094743	36095612	870	1.80324	1.96613	0.779167	0.377399	Intron (ENST00000229795.7/1432, intron 8 of 11)	6	36075865	36076888	1024	1	1432	ENST00000490379.1	18878	ENSG00000112062	MAPK14	mitogen-activated protein kinase 14
chr14	68248332	68249180	849	1.80321	1.29904	0.927228	0.335587	Intron (ENST00000479335.5/5890, intron 8 of 11)	14	68125004	68130196	5193	2	105370546	ENST00000554679.1	-118136	NA	LOC105370546	uncharacterized LOC105370546
chr13	111114371	111115323	953	1.80321	1.28192	0.932948	0.334101	Promoter (<=1kb)	13	111114559	111153962	39404	1	8874	ENST00000483540.1	0	ENSG00000102606	ARHGEF7	Rho guanine nucleotide exchange factor 7
chr19	57726927	57728081	1155	1.80306	4.12259	0.550617	0.458068	Promoter (<=1kb)	19	57719751	57727613	7863	2	79891	ENST00000600125.5	0	ENSG00000083814	ZNF671	zinc finger protein 671
chr11	128501327	128502276	950	1.80295	2.31916	0.718574	0.396615	Intron (ENST00000535549.5/2113, intron 1 of 3)	11	128489470	128505394	15925	2	2113	ENST00000608978.1	3118	ENSG00000134954	ETS1	ETS proto-oncogene 1, transcription factor
chr17	81936808	81937783	976	1.80288	3.08237	0.622378	0.430167	Promoter (<=1kb)	17	81932384	81937257	4874	2	5831	ENST00000337943.9	0	ENSG00000183010	PYCR1	pyrroline-5-carboxylate reductase 1
chr19	58150369	58150901	533	1.80272	2.70404	0.663446	0.415348	Promoter (<=1kb)	19	58126248	58150789	24542	2	79673	ENST00000598312.6	0	ENSG00000181894	ZNF329	zinc finger protein 329
chr3	196684410	196685485	1076	1.80269	1.38447	0.908247	0.340583	Intron (ENST00000426755.5/54965, intron 2 of 5)	3	196707061	196712248	5188	2	84984	ENST00000399942.4	26763	ENSG00000174007	CEP19	centrosomal protein 19
chr1	32221878	32222981	1104	1.80094	4.1331	0.549155	0.458666	Promoter (<=1kb)	1	32214477	32222333	7857	2	56063	ENST00000491434.5	0	ENSG00000160055	TMEM234	transmembrane protein 234
chr19	13276991	13278209	1219	1.80093	3.24279	0.606682	0.436042	Promoter (<=1kb)	19	13271341	13277933	6593	2	773	ENST00000637485.1	0	ENSG00000141837	CACNA1A	calcium voltage-gated channel subunit alpha1 A
chr15	91021739	91022985	1247	1.80093	3.06004	0.624555	0.429362	Promoter (<=1kb)	15	91022619	91030706	8088	1	101926911	ENST00000556904.5	0	ENSG00000214432	VPS33B-DT	VPS33B divergent transcript
chr1	21936799	21937976	1178	1.80091	2.82877	0.647943	0.420852	Promoter (<=1kb)	1	21822244	21937310	115067	2	3339	ENST00000374695.8	0	ENSG00000142798	HSPG2	heparan sulfate proteoglycan 2
chr3	185823501	185826017	2517	1.80091	2.69226	0.66449	0.414982	Promoter (<=1kb)	3	185643130	185825042	181913	2	10644	ENST00000382199.7	0	ENSG00000073792	IGF2BP2	insulin like growth factor 2 mRNA binding protein 2
chr6	42027895	42028753	859	1.80083	1.57696	0.850915	0.356296	Intron (ENST00000616010.4/896, intron 2 of 4)	6	41936855	42048676	111822	2	896	ENST00000505672.5	19923	ENSG00000112576	CCND3	cyclin D3
chr1	27102617	27103437	821	1.80083	1.34014	0.916921	0.338288	Promoter (<=1kb)	1	27100345	27102795	2451	2	6548	ENST00000447808.1	0	ENSG00000090020	SLC9A1	solute carrier family 9 member A1
chr19	48271012	48272019	1008	1.80079	1.0643	1.00699	0.315628	Promoter (<=1kb)	19	48262900	48271283	8384	2	105372429	ENST00000600941.1	0	NA	ZNF114-AS1	ZNF114 antisense RNA 1
chr3	37860180	37861923	1744	1.79915	3.74104	0.568282	0.450945	Promoter (<=1kb)	3	37693655	37861771	168117	2	101928153	ENST00000653023.1	0	ENSG00000235257	ITGA9-AS1	ITGA9 antisense RNA 1
chr5	56147994	56148968	975	1.79905	1.91828	0.778188	0.377699	Intron (ENST00000341048.9/79722, intron 6 of 11)	5	56111578	56160929	49352	2	79722	ENST00000505970.2	11961	ENSG00000164512	ANKRD55	ankyrin repeat domain 55
chr17	2024425	2025859	1435	1.79852	3.52502	0.583704	0.444867	Promoter (<=1kb)	17	1934677	2025334	90658	2	146760	ENST00000331238.7	0	ENSG00000185924	RTN4RL1	reticulon 4 receptor like 1
chr4	108572260	108573101	842	1.7985	1.23618	0.945125	0.330966	Intron (ENST00000507248.1/285456, intron 1 of 3)	4	108556101	108620395	64295	2	285456	ENST00000509984.1	47294	ENSG00000234492	RPL34-DT	RPL34 divergent transcript
chr19	52821038	52822137	1100	1.79821	1.9909	0.768669	0.380632	Promoter (<=1kb)	19	52797408	52821633	24226	2	7576	ENST00000457749.7	0	ENSG00000198538	ZNF28	zinc finger protein 28
chr18	8609950	8610811	862	1.79821	1.65871	0.838229	0.359907	Promoter (<=1kb)	18	8609437	8639383	29947	1	201475	ENST00000649141.2	513	ENSG00000206418	RAB12	RAB12, member RAS oncogene family
chr9	128249772	128250946	1175	1.79621	5.48161	0.483041	0.48705	Promoter (<=1kb)	9	128250802	128254162	3361	1	1759	ENST00000625457.1	0	ENSG00000106976	DNM1	dynamin 1
chr14	100546019	100548414	2396	1.79564	4.46196	0.529481	0.466827	Promoter (<=1kb)	14	100537147	100548098	10952	2	57596	ENST00000554356.6	0	ENSG00000183092	BEGAIN	brain enriched guanylate kinase associated
chr3	42526450	42527406	957	1.79558	1.69316	0.822835	0.364355	Promoter (<=1kb)	3	42527653	42530897	3245	1	7433	ENST00000495189.1	-247	ENSG00000114812	VIPR1	vasoactive intestinal peptide receptor 1
chr1	9561221	9561715	495	1.79513	1.00224	0.978346	0.322611	Intron (ENST00000302692.7/84275, intron 2 of 6)	1	9539465	9585173	45709	1	84275	ENST00000302692.7	21756	ENSG00000171612	SLC25A33	solute carrier family 25 member 33
chr5	131536458	131537128	671	1.79407	1.5249	0.855671	0.354956	Intron (ENST00000509018.6/51735, intron 6 of 27)	5	131505482	131533033	27552	2	51735	ENST00000513227.5	-3425	ENSG00000158987	RAPGEF6	Rap guanine nucleotide exchange factor 6
chr19	12760511	12761025	515	1.79407	1.20074	0.954412	0.328602	Promoter (2-3kb)	19	12763363	12763722	360	2	29911	ENST00000589915.1	2697	ENSG00000095066	HOOK2	hook microtubule tethering protein 2
chr1	160046476	160047434	959	1.79407	1.12832	0.982036	0.3217	Intron (ENST00000639408.1/3766, intron 1 of 3)	1	160024953	160031990	7038	2	93183	ENST00000368090.5	-14486	ENSG00000143315	PIGM	phosphatidylinositol glycan anchor biosynthesis class M
chr15	89361669	89362435	767	1.7938	1.70982	0.821751	0.364672	Promoter (<=1kb)	15	89362474	89398485	36012	1	254559	ENST00000654171.1	-39	ENSG00000255571	MIR9-3HG	MIR9-3 host gene
chr13	30802635	30803670	1036	1.79368	2.1846	0.73385	0.391641	Promoter (<=1kb)	13	30803206	30810645	7440	1	100874158	ENST00000414407.1	0	ENSG00000237879	LINC00398	long intergenic non-protein coding RNA 398
chr22	43811740	43813041	1302	1.79329	3.91327	0.556628	0.455624	Promoter (<=1kb)	22	43812456	43817394	4939	1	107985564	ENST00000563715.1	0	NA	EFCAB6-DT	EFCAB6 divergent transcript
chr17	44014437	44015588	1152	1.79323	2.64076	0.666288	0.414351	Promoter (<=1kb)	17	44011188	44014963	3776	2	84336	ENST00000206380.8	0	ENSG00000091947	TMEM101	transmembrane protein 101
chr13	25971282	25971961	680	1.79305	1.3654	0.903289	0.341904	Intron (ENST00000381655.7/51761, intron 35 of 36)	13	26009971	26025102	15132	1	51761	ENST00000683868.1	-38010	ENSG00000132932	ATP8A2	ATPase phospholipid transporting 8A2
chr8	8848173	8849574	1402	1.79241	2.74514	0.651769	0.419483	Intron (ENST00000276282.7/9258, intron 1 of 2)	8	8785759	8860031	74273	2	9258	ENST00000521881.5	10457	ENSG00000147324	MFHAS1	multifunctional ROCO family signaling regulator 1
chr1	207644698	207645671	974	1.79227	2.25106	0.71496	0.397805	Promoter (<=1kb)	1	207645113	207684036	38924	1	1379	ENST00000531844.5	0	ENSG00000197721	CR1L	complement C3b/C4b receptor 1 like
chr12	96214774	96215774	1001	1.79214	2.2293	0.724454	0.394689	Intron (ENST00000228741.8/2004, intron 1 of 4)	12	96194614	96247211	52598	1	2004	ENST00000547860.1	20160	ENSG00000111145	ELK3	ETS transcription factor ELK3
chr22	42648609	42650021	1413	1.7921	4.92151	0.505266	0.477198	Promoter (<=1kb)	22	42617840	42649392	31553	2	1727	ENST00000352397.10	0	ENSG00000100243	CYB5R3	cytochrome b5 reductase 3
chr11	35216254	35217617	1364	1.79178	3.11011	0.611554	0.434206	Promoter (1-2kb)	11	35218929	35221731	2803	1	960	ENST00000531141.1	-1312	ENSG00000026508	CD44	CD44 molecule (Indian blood group)
chr11	6413451	6414295	845	1.79174	3.16595	0.604125	0.437011	Intron (ENST00000389906.6/322, intron 1 of 13)	11	6395125	6419070	23946	2	322	ENST00000299402.10	4775	ENSG00000166313	APBB1	amyloid beta precursor protein binding family B member 1
chr20	62219928	62221013	1086	1.79165	1.83403	0.791895	0.373531	Promoter (<=1kb)	20	62214960	62220278	5319	2	11255	ENST00000340177.10	0	ENSG00000101180	HRH3	histamine receptor H3
chr16	87871210	87871993	784	1.79139	2.40805	0.696836	0.403851	Promoter (1-2kb)	16	87830023	87869507	39485	2	8140	ENST00000261622.5	-1703	ENSG00000103257	SLC7A5	solute carrier family 7 member 5
chr11	119363559	119364886	1328	1.79116	1.99192	0.762211	0.38264	Promoter (<=1kb)	11	119364359	119410269	45911	1	100499227	ENST00000668377.1	0	NA	USP2-AS1	USP2 antisense RNA 1 (head to head)
chr1	211323386	211323830	445	1.79116	1.68049	0.826377	0.363325	Promoter (2-3kb)	1	211326615	211365509	38895	1	7188	ENST00000462410.5	-2785	ENSG00000082512	TRAF5	TNF receptor associated factor 5
chr13	26985037	26985934	898	1.79052	1.03214	1.01185	0.314463	Intron (ENST00000637583.1/ENST00000637583.1, intron 2 of 2)	13	27089438	27095706	6269	2	219333	ENST00000612674.1	109772	ENSG00000152484	USP12	ubiquitin specific peptidase 12
chr17	68462649	68463350	702	1.7904	1.90765	0.780197	0.377084	Intron (ENST00000590353.1/5573, intron 1 of 5)	17	68433509	68457513	24005	2	55062	ENST00000586815.1	-5136	ENSG00000070540	WIPI1	WD repeat domain, phosphoinositide interacting 1
chr14	75068887	75070276	1390	1.79	2.51197	0.682831	0.408616	Promoter (<=1kb)	14	75069577	75078423	8847	1	79696	ENST00000238686.8	0	ENSG00000119703	ZC2HC1C	zinc finger C2HC-type containing 1C
chr14	100246562	100247648	1087	1.7899	1.27287	0.926121	0.335876	Intron (ENST00000262238.10/7528, intron 1 of 4)	14	100239887	100277796	37910	1	7528	ENST00000651219.1	6675	ENSG00000100811	YY1	YY1 transcription factor
chr12	92132083	92134251	2169	1.78983	3.60612	0.572648	0.449211	Promoter (2-3kb)	12	91993192	92137021	143830	2	256021	ENST00000552277.3	2770	ENSG00000257242	LINC01619	long intergenic non-protein coding RNA 1619
chr17	80789648	80790669	1022	1.78945	1.52607	0.855803	0.354919	Intron (ENST00000574767.5/57521, intron 5 of 11)	17	80801640	80805632	3993	2	101928855	ENST00000570335.1	14963	ENSG00000262833	LOC101928855	uncharacterized LOC101928855
chr20	1656669	1658047	1379	1.7891	1.59802	0.839976	0.359407	Promoter (<=1kb)	20	1629152	1657756	28605	2	55423	ENST00000344103.8	0	ENSG00000089012	SIRPG	signal regulatory protein gamma
chr4	3531852	3533010	1159	1.78905	4.66768	0.515462	0.472786	Promoter (<=1kb)	4	3503612	3532422	28811	2	4043	ENST00000650182.1	0	ENSG00000163956	LRPAP1	LDL receptor related protein associated protein 1
chr12	56079071	56080409	1339	1.78895	3.5693	0.574717	0.448393	Promoter (<=1kb)	12	56079857	56085139	5283	1	2065	ENST00000549282.5	0	ENSG00000065361	ERBB3	erb-b2 receptor tyrosine kinase 3
chr2	196144152	196145537	1386	1.78883	2.17527	0.727011	0.393856	Intron (ENST00000263955.9/9262, intron 4 of 7)	2	196163364	196171000	7637	2	9262	ENST00000449152.1	25463	ENSG00000081320	STK17B	serine/threonine kinase 17b
chr3	128075212	128077266	2055	1.78881	4.20502	0.538133	0.46321	Promoter (<=1kb)	3	128075810	128079056	3247	1	100874089	ENST00000485218.1	0	ENSG00000239608	RUVBL1-AS1	RUVBL1 antisense RNA 1
chr19	55634625	55635659	1035	1.78844	4.25111	0.535772	0.464192	Promoter (<=1kb)	19	55635016	55642818	7803	1	107983998	ENST00000592881.1	0	NA	LOC107983998	uncharacterized LOC107983998
chr1	154345157	154345628	472	1.78842	1.90839	0.77752	0.377903	Promoter (<=1kb)	1	154346615	154349459	2845	1	57198	ENST00000505882.1	-987	ENSG00000143515	ATP8B2	ATPase phospholipid transporting 8B2
chr6	125918432	125919757	1326	1.78813	2.15204	0.734872	0.391311	Promoter (<=1kb)	6	125919224	125931111	11888	1	135112	ENST00000438495.6	0	ENSG00000111912	NCOA7	nuclear receptor coactivator 7
chr17	67401832	67402966	1135	1.78813	1.98902	0.763804	0.382143	Intron (ENST00000581322.6/26207, intron 1 of 8)	17	67378966	67578225	199260	1	26207	ENST00000584471.5	22866	ENSG00000154217	PITPNC1	phosphatidylinositol transfer protein cytoplasmic 1
chr22	41681833	41683160	1328	1.78764	3.91345	0.553122	0.457047	Promoter (<=1kb)	22	41674707	41682622	7916	2	4809	ENST00000215956.10	0	ENSG00000100138	SNU13	small nuclear ribonucleoprotein 13
chr5	140710463	140711727	1265	1.78746	5.2472	0.488606	0.484552	Promoter (<=1kb)	5	140711275	140711373	99	1	56664	ENST00000363120.1	0	ENSG00000199990	VTRNA1-1	vault RNA 1-1
chr20	5749802	5750970	1169	1.78633	3.06945	0.613639	0.433423	Promoter (<=1kb)	20	5750393	5773447	23055	1	149840	ENST00000378979.8	0	ENSG00000171984	SHLD1	shieldin complex subunit 1
chr12	13098096	13098510	415	1.78621	2.47876	0.681704	0.409003	Promoter (2-3kb)	12	13084577	13095806	11230	2	83445	ENST00000396302.7	-2290	ENSG00000111305	GSG1	germ cell associated 1
chr16	2194613	2196485	1873	1.78619	2.27072	0.712787	0.398523	Promoter (<=1kb)	16	2177180	2196605	19426	2	57524	ENST00000343516.8	120	ENSG00000167971	CASKIN1	CASK interacting protein 1
chr4	89829358	89830113	756	1.78619	2.12556	0.73729	0.390533	Intron (ENST00000673902.1/6622, intron 2 of 6)	4	89726628	89835667	109040	2	6622	ENST00000611107.1	5554	ENSG00000145335	SNCA	synuclein alpha
chr17	49996324	49997178	855	1.78615	2.05814	0.746754	0.387509	Promoter (1-2kb)	17	49990005	49995224	5220	2	1747	ENST00000434704.2	-1100	ENSG00000064195	DLX3	distal-less homeobox 3
chr16	307734	309770	2037	1.78608	1.96126	0.761137	0.382976	Intron (ENST00000461023.5/8312, intron 3 of 7)	16	288190	293536	5347	2	8312	ENST00000457798.1	-14198	ENSG00000103126	AXIN1	axin 1
chr9	35696268	35697533	1266	1.78603	1.3897	0.890778	0.345269	Promoter (1-2kb)	9	35698044	35699328	1285	2	7094	ENST00000489255.2	1795	ENSG00000137076	TLN1	talin 1
chr20	45798786	45799855	1070	1.78603	1.37026	0.896521	0.343719	Intron (ENST00000372622.8/116092, intron 4 of 12)	20	45802997	45805366	2370	1	116092	ENST00000467701.1	-3142	ENSG00000101457	DNTTIP1	deoxynucleotidyltransferase terminal interacting protein 1
chr20	51561743	51562832	1090	1.78588	1.00017	1.02101	0.312282	Promoter (<=1kb)	20	51388626	51562831	174206	2	4773	ENST00000609943.5	0	ENSG00000101096	NFATC2	nuclear factor of activated T cells 2
chr19	9674460	9675671	1212	1.7854	3.11295	0.608887	0.435209	Promoter (<=1kb)	19	9641807	9675100	33294	2	54811	ENST00000453372.7	0	ENSG00000171466	ZNF562	zinc finger protein 562
chr2	126662344	126665179	2836	1.78527	3.06822	0.612952	0.433681	Intron (ENST00000459787.1/2995, intron 1 of 1)	2	126656189	126696667	40479	1	2995	ENST00000356887.12	6155	ENSG00000136732	GYPC	glycophorin C (Gerbich blood group)
chr14	100159039	100160083	1045	1.78505	3.20663	0.598162	0.439283	Promoter (<=1kb)	14	100143957	100159645	15689	2	123099	ENST00000305631.7	0	ENSG00000168350	DEGS2	delta 4-desaturase, sphingolipid 2
chr19	9795846	9796398	553	1.78461	3.38974	0.585056	0.44434	Promoter (2-3kb)	19	9787408	9793180	5773	2	100505555	ENST00000589038.1	-2666	ENSG00000196605	LOC100505555	uncharacterized LOC100505555
chr19	9139920	9141003	1084	1.784	3.45617	0.580095	0.446277	Promoter (<=1kb)	19	9140397	9163408	23012	1	57693	ENST00000360385.7	0	ENSG00000130803	ZNF317	zinc finger protein 317
chr13	75869723	75870787	1065	1.78399	2.06769	0.744735	0.388151	Promoter (<=1kb)	13	75871038	75883811	12774	1	729420	ENST00000318245.5	-251	ENSG00000178734	LMO7DN	LMO7 downstream neighbor
chr14	104864514	104866003	1490	1.78394	2.76654	0.644968	0.42192	Promoter (<=1kb)	14	104865268	104896747	31480	1	283638	ENST00000414716.8	0	ENSG00000099814	CEP170B	centrosomal protein 170B
chr17	5467944	5469384	1441	1.78384	3.28965	0.59229	0.441537	Promoter (<=1kb)	17	5469092	5470360	1269	1	105371506	ENST00000571506.1	0	ENSG00000262099	DHX33-DT	DHX33 divergent transcript
chr12	53267676	53268798	1123	1.78296	3.98474	0.546713	0.459666	Promoter (<=1kb)	12	53268299	53293638	25340	1	9700	ENST00000257934.9	0	ENSG00000135476	ESPL1	extra spindle pole bodies like 1, separase
chr3	71304762	71306006	1245	1.78277	2.03489	0.743362	0.388589	Promoter (<=1kb)	3	71015590	71305986	290397	2	27086	ENST00000647614.1	0	ENSG00000114861	FOXP1	forkhead box P1
chr2	74440219	74441207	989	1.78277	1.65617	0.819391	0.365361	Promoter (<=1kb)	2	74425836	74440583	14748	2	6242	ENST00000305557.9	0	ENSG00000114993	RTKN	rhotekin
chr8	143878137	143879172	1036	1.78277	1.654	0.81988	0.365218	Promoter (<=1kb)	8	143857324	143878467	21144	2	83481	ENST00000615648.2	0	ENSG00000261150	EPPK1	epiplakin 1
chr18	24138471	24139730	1260	1.78222	3.2409	0.594358	0.440741	Promoter (<=1kb)	18	24138987	24159662	20676	1	26256	ENST00000627314.1	0	ENSG00000154040	CABYR	calcium binding tyrosine phosphorylation regulated
chr19	57599553	57600393	841	1.78113	2.30896	0.704652	0.401228	Promoter (<=1kb)	19	57599885	57610098	10214	1	348327	ENST00000332854.11	0	ENSG00000183647	ZNF530	zinc finger protein 530
chr15	67541471	67543243	1773	1.78107	4.51053	0.519018	0.471263	Promoter (<=1kb)	15	67542703	67807114	264412	1	5607	ENST00000178640.10	0	ENSG00000137764	MAP2K5	mitogen-activated protein kinase kinase 5
chr4	153152949	153154248	1300	1.78098	3.77312	0.556551	0.455655	Promoter (<=1kb)	4	153153023	153339311	186289	1	23321	ENST00000676458.1	0	ENSG00000109654	TRIM2	tripartite motif containing 2
chr19	3103571	3104573	1003	1.78093	2.72598	0.64709	0.421158	Intron (ENST00000078429.9/2767, intron 1 of 6)	19	3113463	3121457	7995	1	2767	ENST00000587636.1	-8890	ENSG00000088256	GNA11	G protein subunit alpha 11
chr13	20192264	20194448	2185	1.78076	2.61849	0.658596	0.417058	Promoter (<=1kb)	13	20187470	20192938	5469	2	2706	ENST00000382848.5	0	ENSG00000165474	GJB2	gap junction protein beta 2
chr5	396017	396854	838	1.78056	1.42362	0.861856	0.353223	Intron (ENST00000505113.6/116412618, intron 6 of 12)	5	420920	435110	14191	1	57491	ENST00000506456.1	-24066	ENSG00000063438	AHRR	aryl-hydrocarbon receptor repressor
chr13	112894018	112895158	1141	1.78056	1.06802	0.981936	0.321724	Promoter (<=1kb)	13	112894378	113096861	202484	1	23263	ENST00000375608.7	0	ENSG00000126217	MCF2L	MCF.2 cell line derived transforming sequence like
chr1	2246226	2246769	544	1.78056	1.0645	0.983394	0.321365	Promoter (1-2kb)	1	2247996	2303376	55381	1	6497	ENST00000478223.2	-1227	ENSG00000157933	SKI	SKI proto-oncogene
chr17	75250019	75251974	1956	1.7804	1.6343	0.82518	0.363673	Intron (ENST00000538886.5/23163, intron 1 of 15)	17	75240949	75242368	1420	2	23163	ENST00000578896.1	-7651	ENSG00000125447	GGA3	golgi associated, gamma adaptin ear containing, ARF binding protein 3
chr17	48456839	48457696	858	1.78033	2.20336	0.719905	0.396178	Promoter (2-3kb)	17	48460370	48466040	5671	1	101927166	ENST00000579972.1	-2674	NA	LOC101927166	uncharacterized LOC101927166
chr1	167473264	167474805	1542	1.7803	3.44834	0.575863	0.447941	Intron (ENST00000362089.10/919, intron 1 of 7)	1	167455195	167458646	3452	1	101928512	ENST00000660512.1	18069	NA	LOC101928512	uncharacterized LOC101928512
chr11	66347430	66348502	1073	1.78024	4.20108	0.533633	0.465086	Promoter (<=1kb)	11	66347950	66353619	5670	1	102724064	ENST00000581155.5	0	ENSG00000255468	LOC102724064	uncharacterized LOC102724064
chr19	10700869	10702348	1480	1.78008	3.75929	0.557027	0.455463	Promoter (<=1kb)	19	10701430	10713345	11916	1	81890	ENST00000589488.5	0	ENSG00000213339	QTRT1	queuine tRNA-ribosyltransferase catalytic subunit 1
chr20	38645714	38647023	1310	1.77993	2.53173	0.671128	0.412661	Promoter (<=1kb)	20	38647063	38651035	3973	1	343578	ENST00000414158.1	-40	ENSG00000124143	ARHGAP40	Rho GTPase activating protein 40
chr1	16888873	16889747	875	1.77966	1.58883	0.832763	0.361478	Promoter (<=1kb)	1	16887577	16889518	1942	2	105376805	ENST00000654227.1	0	ENSG00000238142	LOC105376805	uncharacterized LOC105376805
chr16	30052660	30053799	1140	1.77929	2.49646	0.67658	0.410769	Promoter (<=1kb)	16	30053123	30070403	17281	1	112694756	ENST00000395248.6	0	ENSG00000285043	LOC112694756	uncharaterized LOC112694756
chr15	52651671	52652588	918	1.7791	1.16898	0.929809	0.334916	Promoter (<=1kb)	15	52581853	52652050	70198	2	56204	ENST00000546305.6	0	ENSG00000047346	FAM214A	family with sequence similarity 214 member A
chr10	103677797	103678969	1173	1.77902	3.97367	0.545045	0.460352	Intron (ENST00000369774.8/9644, intron 6 of 14)	10	103599520	103693623	94104	2	9644	ENST00000315994.6	14654	ENSG00000107957	SH3PXD2A	SH3 and PX domains 2A
chr5	96875664	96877301	1638	1.77855	4.48146	0.51891	0.471309	Promoter (<=1kb)	5	96875986	96909030	33045	1	64167	ENST00000510373.5	0	ENSG00000164308	ERAP2	endoplasmic reticulum aminopeptidase 2
chr19	44112853	44114104	1252	1.77833	3.33751	0.585585	0.444134	Promoter (<=1kb)	19	44103007	44113183	10177	2	100379224	ENST00000661725.1	0	ENSG00000186019	LOC100379224	uncharacterized LOC100379224
chr19	37334184	37335213	1030	1.77802	3.26739	0.589059	0.442786	Promoter (<=1kb)	19	37334624	37362299	27676	1	284459	ENST00000592768.5	0	ENSG00000181666	ZNF875	zinc finger protein 875
chr10	42753096	42754979	1884	1.77786	2.48893	0.673336	0.411893	Promoter (<=1kb)	10	42751178	42754297	3120	2	283028	ENST00000568976.2	0	NA	LOC283028	uncharacterized LOC283028
chr2	224523224	224524884	1661	1.7777	2.92696	0.622892	0.429977	Intron (ENST00000264414.9/8452, intron 3 of 15)	2	224511438	224533094	21657	2	8452	ENST00000541548.5	8210	ENSG00000036257	CUL3	cullin 3
chr10	69572461	69574431	1971	1.77747	1.20729	0.93405	0.333816	Promoter (<=1kb)	10	69571698	69573422	1725	2	50674	ENST00000242462.5	0	ENSG00000122859	NEUROG3	neurogenin 3
chr17	79400453	79401653	1201	1.77711	1.96641	0.757147	0.384225	Intron (ENST00000583458.5/146713, intron 1 of 13)	17	79233627	79424120	190494	2	146713	ENST00000578887.1	22467	ENSG00000167281	RBFOX3	RNA binding fox-1 homolog 3
chr16	48622828	48624003	1176	1.77699	2.67144	0.650143	0.420064	Promoter (<=1kb)	16	48623422	48746318	122897	1	105371240	ENST00000568150.3	0	NA	LOC105371240	uncharacterized LOC105371240
chr14	22597710	22599090	1381	1.77685	3.3232	0.585519	0.444159	Promoter (<=1kb)	14	22598237	22613215	14979	1	63874	ENST00000428304.6	0	ENSG00000100439	ABHD4	abhydrolase domain containing 4, N-acyl phospholipase B
chr4	54657587	54659142	1556	1.77669	2.09596	0.728894	0.393245	Promoter (<=1kb)	4	54657918	54739011	81094	1	3815	ENST00000412167.6	0	ENSG00000157404	KIT	KIT proto-oncogene, receptor tyrosine kinase
chr11	6654483	6655779	1297	1.77669	2.03557	0.739298	0.389888	Promoter (<=1kb)	11	6621330	6655809	34480	2	8642	ENST00000299441.5	30	ENSG00000166341	DCHS1	dachsous cadherin-related 1
chr8	23410125	23410917	793	1.77669	1.90598	0.763122	0.382356	Intron (ENST00000524144.5/4017, intron 1 of 3)	8	23368065	23404226	36162	2	4017	ENST00000519243.1	-5899	ENSG00000134013	LOXL2	lysyl oxidase like 2
chr1	156581861	156582875	1015	1.77669	1.65157	0.816152	0.36631	Promoter (<=1kb)	1	156582067	156585244	3178	1	164118	ENST00000413282.6	0	ENSG00000187862	TTC24	tetratricopeptide repeat domain 24
chr1	39816704	39818073	1370	1.77639	2.34346	0.696044	0.404119	Promoter (<=1kb)	1	39801414	39817460	16047	2	107985740	ENST00000641026.1	0	NA	LINC02811	long intergenic non-protein coding RNA 2811
chr15	74695468	74696665	1198	1.776	3.37807	0.580339	0.446182	Promoter (<=1kb)	15	74630558	74696024	65467	2	80153	ENST00000315127.9	0	ENSG00000179151	EDC3	enhancer of mRNA decapping 3
chr9	130010020	130010950	931	1.77544	2.57179	0.663402	0.415364	Intron (ENST00000446176.7/23048, intron 1 of 16)	9	129978347	129994935	16589	2	23048	ENST00000491905.1	-15085	ENSG00000187239	FNBP1	formin binding protein 1
chr13	73859346	73861787	2442	1.77544	2.55882	0.665205	0.414731	Intron (ENST00000377669.7/11278, intron 3 of 7)	13	73812873	73995056	182184	2	11278	ENST00000472022.1	133269	ENSG00000118922	KLF12	Kruppel like factor 12
chr2	84832849	84833801	953	1.77537	1.52973	0.841382	0.359005	Promoter (1-2kb)	2	84821666	84835504	13839	2	129293	ENST00000479944.5	1703	ENSG00000186854	TRABD2A	TraB domain containing 2A
chr2	64643423	64645235	1813	1.77426	3.39319	0.577583	0.447263	Promoter (<=1kb)	2	64644612	64646698	2087	1	105374775	ENST00000439964.1	0	NA	LOC105374775	uncharacterized LOC105374775
chr17	66673316	66674435	1120	1.77337	3.05523	0.606785	0.436003	Intron (ENST00000413366.8/5578, intron 5 of 16)	17	66787072	66787168	97	1	693219	ENST00000385208.1	-112637	ENSG00000207943	MIR634	microRNA 634
chr1	153677630	153679972	2343	1.77314	3.21101	0.590424	0.442257	Promoter (<=1kb)	1	153678688	153693992	15305	1	4881	ENST00000368680.4	0	ENSG00000169418	NPR1	natriuretic peptide receptor 1
chr10	102431996	102433505	1510	1.77311	4.17787	0.530837	0.466257	Promoter (<=1kb)	10	102423249	102432574	9326	2	79004	ENST00000369937.5	0	ENSG00000107874	CUEDC2	CUE domain containing 2
chr19	56594993	56595931	939	1.77309	3.24385	0.588916	0.442841	Promoter (<=1kb)	19	56595313	56799602	204290	1	101929059	ENST00000650950.1	0	ENSG00000286125	ZIM2-AS1	ZIM2 antisense RNA 1
chr1	1348766	1349979	1214	1.77304	3.68982	0.557858	0.455127	Promoter (<=1kb)	1	1335276	1349112	13837	2	1855	ENST00000378891.9	0	ENSG00000107404	DVL1	dishevelled segment polarity protein 1
chr20	63496050	63496872	823	1.77271	1.87274	0.769019	0.380523	Promoter (1-2kb)	20	63490081	63498748	8668	2	1917	ENST00000645586.1	1876	ENSG00000101210	EEF1A2	eukaryotic translation elongation factor 1 alpha 2
chr7	150978517	150978915	399	1.77271	1.82055	0.779448	0.377313	Promoter (<=1kb)	7	150944961	150978321	33361	2	3757	ENST00000262186.10	-196	ENSG00000055118	KCNH2	potassium voltage-gated channel subfamily H member 2
chr2	218883358	218883814	457	1.77225	2.27467	0.70195	0.402132	Promoter (<=1kb)	2	218883850	218890099	6250	1	107984111	ENST00000483911.1	-36	NA	LOC107984111	uncharacterized LOC107984111
chr5	80183197	80183930	734	1.77219	1.98211	0.743348	0.388593	Intron (ENST00000509193.5/256987, intron 2 of 12)	5	80156994	80167180	10187	2	256987	ENST00000502747.1	-16017	ENSG00000164300	SERINC5	serine incorporator 5
chr9	128927488	128928346	859	1.77219	1.24653	0.921847	0.336993	Promoter (<=1kb)	9	128927046	128940709	13664	1	254295	ENST00000424503.1	442	ENSG00000175287	PHYHD1	phytanoyl-CoA dioxygenase domain containing 1
chr14	99971019	99971961	943	1.77204	4.0917	0.534898	0.464557	Promoter (<=1kb)	14	99971449	100144236	172788	1	51466	ENST00000402714.6	0	ENSG00000196405	EVL	Enah/Vasp-like
chr8	8871725	8872913	1189	1.77198	2.81219	0.629806	0.427429	Intron (ENST00000276282.7/9258, intron 1 of 2)	8	8785759	8860031	74273	2	9258	ENST00000521881.5	-11694	ENSG00000147324	MFHAS1	multifunctional ROCO family signaling regulator 1
chr17	81386796	81387852	1057	1.77114	1.4648	0.858645	0.354121	Promoter (1-2kb)	17	81375261	81385464	10204	2	100130370	ENST00000659293.1	-1332	ENSG00000262223	LOC100130370	uncharacterized LOC100130370
chr16	2486573	2487842	1270	1.77105	2.51578	0.666552	0.414259	Intron (ENST00000567020.6/57465, intron 1 of 6)	16	2483037	2500378	17342	1	57465	ENST00000643767.1	3536	ENSG00000162065	TBC1D24	TBC1 domain family member 24
chr19	34997119	34998039	921	1.77049	2.87883	0.619745	0.431144	Promoter (1-2kb)	19	34999387	35010379	10993	1	57655	ENST00000594597.5	-1348	ENSG00000089351	GRAMD1A	GRAM domain containing 1A
chr22	20507247	20508366	1120	1.77043	4.21775	0.527542	0.467644	Promoter (<=1kb)	22	20507541	20564493	56953	1	51586	ENST00000444094.5	0	ENSG00000099917	MED15	mediator complex subunit 15
chr17	80146264	80147958	1695	1.7701	5.71438	0.460372	0.497452	Promoter (<=1kb)	17	80134369	80147128	12760	2	9775	ENST00000649764.2	0	ENSG00000141543	EIF4A3	eukaryotic translation initiation factor 4A3
chr18	76490737	76493948	3212	1.77003	4.95459	0.491619	0.483208	Promoter (<=1kb)	18	76491629	76493168	1540	1	101927989	ENST00000657360.1	0	ENSG00000265778	ZNF516-AS1	ZNF516 antisense RNA 1
chr5	131532040	131533062	1023	1.77	2.33546	0.691721	0.405582	Promoter (<=1kb)	5	131472090	131533006	60917	2	51735	ENST00000514179.5	0	ENSG00000158987	RAPGEF6	Rap guanine nucleotide exchange factor 6
chr11	64204598	64204998	401	1.76971	2.0275	0.73962	0.389785	Promoter (1-2kb)	11	64206678	64219322	12645	1	83706	ENST00000544997.5	-1680	ENSG00000149781	FERMT3	FERM domain containing kindlin 3
chr19	47446941	47448121	1181	1.76971	1.95621	0.752584	0.385662	Promoter (<=1kb)	19	47432407	47447622	15216	2	6543	ENST00000601757.1	0	ENSG00000118160	SLC8A2	solute carrier family 8 member A2
chr7	139635379	139636490	1112	1.76942	3.62996	0.558685	0.454793	Intron (ENST00000406875.8/28996, intron 2 of 14)	7	139583524	139717013	133490	2	28996	ENST00000342645.7	80523	ENSG00000064393	HIPK2	homeodomain interacting protein kinase 2
chr10	69629631	69630941	1311	1.7692	2.19207	0.712405	0.398649	Promoter (<=1kb)	10	69630247	69633596	3350	1	219738	ENST00000373279.6	0	ENSG00000171224	FAM241B	family with sequence similarity 241 member B
chr19	49511573	49513892	2320	1.76878	2.31537	0.693254	0.405062	Promoter (<=1kb)	19	49512375	49514309	1935	1	2217	ENST00000598491.5	0	ENSG00000104870	FCGRT	Fc fragment of IgG receptor and transporter
chr9	129320303	129321450	1148	1.76854	2.12467	0.718918	0.396501	Promoter (<=1kb)	9	129321016	129324905	3890	1	414318	ENST00000316786.1	0	NA	LINC02913	long intergenic non-protein coding RNA 2913
chr7	5420176	5421040	865	1.76854	1.77736	0.783324	0.376129	Promoter (2-3kb)	7	5306790	5423546	116757	2	84629	ENST00000399537.8	2506	ENSG00000182095	TNRC18	trinucleotide repeat containing 18
chr9	136403599	136404796	1198	1.76794	3.43258	0.572138	0.449413	Promoter (<=1kb)	9	136402644	136404108	1465	2	10807	ENST00000481114.1	0	ENSG00000165689	ENTR1	endosome associated trafficking regulator 1
chr19	47130357	47131644	1288	1.7677	4.04684	0.534571	0.464693	Promoter (<=1kb)	19	47130782	47155177	24396	1	10055	ENST00000597808.5	0	ENSG00000142230	SAE1	SUMO1 activating enzyme subunit 1
chr17	77609948	77611019	1072	1.76768	2.52073	0.660548	0.416369	Intron (ENST00000649512.1/107985079, intron 3 of 4)	17	77590532	77680687	90156	1	107985079	ENST00000649512.1	19416	NA	LOC107985079	uncharacterized LOC107985079
chr2	19357802	19358635	834	1.76768	2.20302	0.708443	0.399964	Promoter (<=1kb)	2	19351485	19358623	7139	2	130497	ENST00000272223.3	0	ENSG00000143867	OSR1	odd-skipped related transcription factor 1
chr17	59753137	59754855	1719	1.76765	2.38169	0.684837	0.407929	Intron (ENST00000593168.5/81671, intron 3 of 4)	17	59735338	59840106	104769	1	81671	ENST00000592619.5	17799	ENSG00000062716	VMP1	vacuole membrane protein 1
chr12	50504514	50505821	1308	1.76735	4.54956	0.509561	0.475331	Promoter (<=1kb)	12	50504985	50680282	175298	1	57609	ENST00000549620.5	0	ENSG00000066084	DIP2B	disco interacting protein 2 homolog B
chr5	111232657	111233215	559	1.76712	2.29001	0.696118	0.404094	Intron (ENST00000508074.5/814, intron 2 of 5)	5	111224464	111365230	140767	1	814	ENST00000504090.1	8193	ENSG00000152495	CAMK4	calcium/calmodulin dependent protein kinase IV
chr6	90216395	90216817	423	1.76709	1.40137	0.859558	0.353865	Promoter (1-2kb)	6	90089054	90218245	129192	2	60468	ENST00000493201.5	1428	ENSG00000112182	BACH2	BTB domain and CNC homolog 2
chr3	32334564	32335787	1224	1.76709	1.07739	0.969022	0.324927	Intron (ENST00000458535.6/152189, intron 1 of 2)	3	32391698	32454830	63133	1	112616	ENST00000349718.8	-55911	ENSG00000153551	CMTM7	CKLF like MARVEL transmembrane domain containing 7
chr6	157755480	157757266	1787	1.7669	2.60393	0.651179	0.419694	Intron (ENST00000614703.4/51429, intron 1 of 5)	6	157716046	157875087	159042	1	51429	ENST00000614800.4	39434	ENSG00000130340	SNX9	sorting nexin 9
chr17	50507866	50508941	1076	1.76686	3.40059	0.572557	0.449247	Promoter (<=1kb)	17	50508384	50530239	21856	1	84073	ENST00000436259.6	0	ENSG00000136449	MYCBPAP	MYCBP associated protein
chr20	3172937	3174366	1430	1.76671	5.00839	0.487965	0.484839	Promoter (<=1kb)	20	3162617	3173546	10930	2	9762	ENST00000360342.7	0	ENSG00000088899	LZTS3	leucine zipper tumor suppressor family member 3
chr3	101466662	101467715	1054	1.76662	2.2335	0.694622	0.404599	Intron (ENST00000394095.7/57337, intron 3 of 23)	3	101324273	101513184	188912	2	57337	ENST00000394091.5	45469	ENSG00000138468	SENP7	SUMO specific peptidase 7
chr6	99602799	99603902	1104	1.76662	1.53115	0.830911	0.362012	Promoter (2-3kb)	6	99606774	99615578	8805	1	59336	ENST00000369214.2	-2872	ENSG00000112238	PRDM13	PR/SET domain 13
chr19	52027944	52028946	1003	1.76613	4.53332	0.5097	0.475271	Promoter (<=1kb)	19	52012765	52028349	15585	2	80110	ENST00000356322.10	0	ENSG00000142556	ZNF614	zinc finger protein 614
chr16	1543153	1544216	1064	1.76587	1.9267	0.75394	0.385234	Intron (ENST00000253934.9/79652, intron 3 of 3)	16	1533666	1555568	21903	1	79652	ENST00000566264.2	9487	ENSG00000131634	TMEM204	transmembrane protein 204
chr14	101791808	101792922	1115	1.7655	1.85483	0.77155	0.379741	Intron (ENST00000422945.6/5527, intron 2 of 15)	14	101786121	101789896	3776	1	5527	ENST00000556086.1	5687	ENSG00000078304	PPP2R5C	protein phosphatase 2 regulatory subunit B'gamma
chr22	36156695	36157271	577	1.76541	2.41055	0.677412	0.410482	Promoter (<=1kb)	22	36141703	36156936	15234	2	80833	ENST00000487423.5	0	ENSG00000128284	APOL3	apolipoprotein L3
chr2	85420595	85421071	477	1.76523	2.50103	0.66582	0.414515	Promoter (<=1kb)	2	85420837	85426724	5888	1	284948	ENST00000651365.1	0	ENSG00000152292	SH2D6	SH2 domain containing 6
chr9	137551119	137552476	1358	1.76515	4.77954	0.497227	0.480723	Promoter (<=1kb)	9	137551879	137552555	677	1	64975	ENST00000371443.6	0	ENSG00000182154	MRPL41	mitochondrial ribosomal protein L41
chr11	128492682	128494785	2104	1.76501	3.35108	0.575273	0.448173	Intron (ENST00000535549.5/2113, intron 1 of 3)	11	128489470	128505394	15925	2	2113	ENST00000608978.1	10609	ENSG00000134954	ETS1	ETS proto-oncogene 1, transcription factor
chr19	12613027	12614379	1353	1.76429	4.16324	0.526703	0.467999	Promoter (2-3kb)	19	12610958	12612394	1437	1	163049	ENST00000498389.1	2069	ENSG00000173875	ZNF791	zinc finger protein 791
chr7	48035094	48036347	1254	1.76393	4.2739	0.520998	0.470418	Promoter (<=1kb)	7	48035511	48061253	25743	1	136288	ENST00000420324.5	0	ENSG00000164746	C7orf57	chromosome 7 open reading frame 57
chr4	1130177	1131360	1184	1.76388	2.0016	0.741456	0.389198	Promoter (<=1kb)	4	1132309	1132977	669	1	105374344	ENST00000510332.1	-949	ENSG00000251652	LOC105374344	uncharacterized LOC105374344
chr2	85551808	85552890	1083	1.76375	1.9868	0.741362	0.389227	Promoter (<=1kb)	2	85552923	85553803	881	2	2677	ENST00000482662.1	913	ENSG00000115486	GGCX	gamma-glutamyl carboxylase
chr19	40221491	40222560	1070	1.76375	1.91428	0.754848	0.384948	Promoter (1-2kb)	19	40222214	40223564	1351	2	79935	ENST00000593335.1	1004	ENSG00000105219	CCNP	cyclin P
chr19	4327206	4329053	1848	1.76353	5.34104	0.472221	0.491969	Promoter (<=1kb)	19	4324043	4328773	4731	2	55620	ENST00000598443.5	0	ENSG00000178078	STAP2	signal transducing adaptor family member 2
chr11	64868892	64870564	1673	1.76341	3.97921	0.534634	0.464667	Intron (ENST00000320631.8/10938, intron 2 of 4)	11	64859945	64875666	15722	2	10938	ENST00000455148.1	5102	ENSG00000110047	EHD1	EH domain containing 1
chr2	160482099	160483646	1548	1.76326	3.30373	0.577606	0.447254	Intron (ENST00000474820.5/5937, intron 1 of 15)	2	160366913	160492969	126057	2	5937	ENST00000477486.1	9323	ENSG00000153250	RBMS1	RNA binding motif single stranded interacting protein 1
chr19	5967863	5968800	938	1.76319	1.2368	0.907262	0.340845	Intron (ENST00000439268.6/8498, intron 1 of 16)	19	5923194	5978079	54886	2	8498	ENST00000592621.5	9279	ENSG00000031823	RANBP3	RAN binding protein 3
chr19	6086890	6088354	1465	1.76319	1.13669	0.942961	0.33152	Intron (ENST00000303657.10/5990, intron 1 of 17)	19	6026163	6110446	84284	2	5990	ENST00000586302.5	22092	ENSG00000087903	RFX2	regulatory factor X2
chr19	4830931	4832202	1272	1.76307	2.66735	0.642515	0.422804	Promoter (<=1kb)	19	4815932	4831712	15781	2	148022	ENST00000248244.6	0	ENSG00000127666	TICAM1	toll like receptor adaptor molecule 1
chr19	47745176	47746148	973	1.7629	3.98338	0.535301	0.464389	Promoter (<=1kb)	19	47745546	47757058	11513	1	29997	ENST00000246802.10	0	ENSG00000105373	NOP53	NOP53 ribosome biogenesis factor
chr1	155989039	155990267	1229	1.76255	2.24744	0.700568	0.402596	Promoter (<=1kb)	1	155946855	155990073	43219	2	9181	ENST00000462460.6	0	ENSG00000116584	ARHGEF2	Rho/Rac guanine nucleotide exchange factor 2
chr17	76140124	76141800	1677	1.7624	4.23907	0.521616	0.470155	Promoter (<=1kb)	17	76140556	76154283	13728	1	100507218	ENST00000590137.1	0	ENSG00000267128	RNF157-AS1	RNF157 antisense RNA 1
chr10	6583409	6583778	370	1.76239	2.19017	0.709085	0.39975	Promoter (1-2kb)	10	6581669	6584288	2620	1	439949	ENST00000667092.1	1740	ENSG00000237943	PRKCQ-AS1	PRKCQ antisense RNA 1
chr10	131907645	131908097	453	1.76233	1.40744	0.831718	0.361779	Intron (ENST00000455566.6/55844, intron 2 of 8)	10	131901291	131959827	58537	1	55844	ENST00000470416.5	6354	ENSG00000175470	PPP2R2D	protein phosphatase 2 regulatory subunit Bdelta
chr20	2658464	2659054	591	1.76233	1.21086	0.889231	0.345689	Promoter (<=1kb)	20	2659283	2659916	634	2	3420	ENST00000466999.1	862	ENSG00000101365	IDH3B	isocitrate dehydrogenase (NAD(+)) 3 non-catalytic subunit beta
chr16	87724573	87726054	1482	1.76198	2.06996	0.726967	0.393871	Promoter (<=1kb)	16	87710798	87726917	16120	2	54758	ENST00000562913.5	863	ENSG00000104731	KLHDC4	kelch domain containing 4
chr22	39099245	39100358	1114	1.76177	2.42885	0.673912	0.411693	Promoter (<=1kb)	22	39100279	39102558	2280	1	164668	ENST00000613996.1	0	ENSG00000100298	APOBEC3H	apolipoprotein B mRNA editing enzyme catalytic subunit 3H
chr17	8885235	8886333	1099	1.76171	1.9127	0.753758	0.385292	Promoter (<=1kb)	17	8880641	8885086	4446	2	23533	ENST00000578743.5	-149	ENSG00000141506	PIK3R5	phosphoinositide-3-kinase regulatory subunit 5
chr22	50539053	50540194	1142	1.7617	4.65679	0.501293	0.478935	Promoter (<=1kb)	22	50541108	50543011	1904	1	102724608	ENST00000609268.2	-914	NA	LOC102724608	uncharacterized LOC102724608
chr19	11535629	11536610	982	1.7616	2.40714	0.676532	0.410786	Promoter (2-3kb)	19	11538767	11550322	11556	1	1264	ENST00000592923.5	-2157	ENSG00000130176	CNN1	calponin 1
chr1	1470867	1472767	1901	1.76086	4.43881	0.511149	0.474644	Promoter (<=1kb)	1	1471765	1497848	26084	1	83858	ENST00000673477.1	0	ENSG00000160072	ATAD3B	ATPase family AAA domain containing 3B
chr5	137734824	137737982	3159	1.76059	3.51049	0.561717	0.453572	Promoter (<=1kb)	5	137617500	137736089	118590	2	26249	ENST00000309755.9	0	ENSG00000146021	KLHL3	kelch like family member 3
chr7	4681581	4682869	1289	1.76056	3.6507	0.552896	0.457139	Promoter (<=1kb)	7	4682295	4771442	89148	1	221937	ENST00000328914.5	0	ENSG00000164916	FOXK1	forkhead box K1
chr11	73177584	73178666	1083	1.76036	1.20399	0.923062	0.336675	Intron (ENST00000660457.1/ENST00000660457.1, intron 2 of 2)	11	72836745	73142318	305574	2	9873	ENST00000409418.9	-35266	ENSG00000137478	FCHSD2	FCH and double SH3 domains 2
chr20	36886569	36887985	1417	1.7601	2.92685	0.610835	0.434476	Promoter (<=1kb)	20	36887455	36894235	6781	1	140711	ENST00000436941.1	0	ENSG00000101342	TLDC2	TBC/LysM-associated domain containing 2
chr19	55467594	55468544	951	1.75917	1.73628	0.785477	0.375474	Promoter (2-3kb)	19	55463001	55464751	1751	2	111064650	ENST00000635964.2	-2843	ENSG00000283567	C19orf85	chromosome 19 open reading frame 85
chr17	17179327	17180274	948	1.75901	2.24929	0.696311	0.404029	Promoter (<=1kb)	17	17179558	17185560	6003	1	23164	ENST00000579361.1	0	ENSG00000133030	MPRIP	myosin phosphatase Rho interacting protein
chr17	80780541	80781354	814	1.75844	1.41922	0.858832	0.354069	Intron (ENST00000574767.5/57521, intron 5 of 11)	17	80801640	80805632	3993	2	101928855	ENST00000570335.1	24278	ENSG00000262833	LOC101928855	uncharacterized LOC101928855
chr11	63767552	63769705	2154	1.75833	3.62202	0.552995	0.457099	Promoter (<=1kb)	11	63759892	63768775	8884	2	65998	ENST00000433688.2	0	ENSG00000188070	ZFTA	zinc finger translocation associated
chr17	48548378	48548832	455	1.75833	1.63084	0.789324	0.374307	Promoter (<=1kb)	17	48549630	48602332	52703	1	404266	ENST00000465846.6	-798	ENSG00000233101	HOXB-AS3	HOXB cluster antisense RNA 3
chr14	74712518	74713761	1244	1.75816	3.62985	0.552553	0.457279	Promoter (<=1kb)	14	74713144	74732817	19674	1	51077	ENST00000554590.5	0	ENSG00000119616	FCF1	FCF1 rRNA-processing protein
chr2	65064641	65065613	973	1.75784	1.90386	0.752799	0.385594	Intron (ENST00000475851.1/23177, intron 1 of 1)	2	65070729	65074484	3756	1	23177	ENST00000497039.1	-5116	ENSG00000011523	CEP68	centrosomal protein 68
chr16	85114687	85115587	901	1.75784	1.59393	0.818062	0.36575	Promoter (2-3kb)	16	85098358	85112472	14115	2	339145	ENST00000539556.6	-2215	ENSG00000153789	CIBAR2	CBY1 interacting BAR domain containing 2
chr2	197191291	197193076	1786	1.75747	3.49208	0.561318	0.453732	Intron (ENST00000282272.15/91526, intron 1 of 27)	2	197197991	197199273	1283	1	101927596	ENST00000449346.1	-4915	ENSG00000231621	ANKRD44-AS1	ANKRD44 antisense RNA 1
chr7	100866065	100867806	1742	1.75722	2.48582	0.661273	0.416113	Promoter (<=1kb)	7	100867387	100868141	755	1	7205	ENST00000496260.1	0	ENSG00000087077	TRIP6	thyroid hormone receptor interactor 6
chr16	11782953	11784195	1243	1.75664	4.30112	0.515465	0.472785	Promoter (<=1kb)	16	11776758	11783034	6277	2	29066	ENST00000572870.5	0	ENSG00000122299	ZC3H7A	zinc finger CCCH-type containing 7A
chr12	7107891	7109555	1665	1.75661	3.91462	0.535136	0.464458	Promoter (<=1kb)	12	7108052	7111606	3555	1	283314	ENST00000435921.6	0	ENSG00000205885	C1RL-AS1	C1RL antisense RNA 1
chr14	100107838	100108728	891	1.75598	2.61524	0.641497	0.423172	Promoter (<=1kb)	14	100109419	100109514	96	2	100616247	ENST00000584249.1	786	ENSG00000265154	MIR151B	microRNA 151b
chr3	50272676	50273519	844	1.75598	2.38113	0.67415	0.411611	Promoter (<=1kb)	3	50273236	50273297	62	1	102465526	ENST00000612981.1	0	ENSG00000283848	MIR6872	microRNA 6872
chr19	8050246	8051091	846	1.75544	2.97652	0.602173	0.437753	Promoter (1-2kb)	19	8052318	8062650	10333	1	6370	ENST00000680646.1	-1227	ENSG00000131142	CCL25	C-C motif chemokine ligand 25
chr3	49856135	49857280	1146	1.75495	4.01921	0.52864	0.467181	Promoter (<=1kb)	3	49828601	49856564	27964	2	10293	ENST00000331456.7	0	ENSG00000183763	TRAIP	TRAF interacting protein
chr9	129202576	129203504	929	1.75495	3.84197	0.538032	0.463252	Promoter (1-2kb)	9	129201315	129209848	8534	1	105376289	ENST00000451229.2	1261	NA	LOC105376289	uncharacterized LOC105376289
chr17	82892845	82894121	1277	1.75461	2.94627	0.605412	0.436523	Promoter (<=1kb)	17	82893064	82925056	31993	1	6904	ENST00000574975.5	0	ENSG00000141556	TBCD	tubulin folding cofactor D
chr19	12332379	12334148	1770	1.75435	5.028	0.480483	0.488206	Promoter (<=1kb)	19	12317477	12333633	16157	2	147837	ENST00000293725.10	0	ENSG00000188868	ZNF563	zinc finger protein 563
chr12	9633940	9634832	893	1.75376	1.70304	0.786382	0.375199	Promoter (<=1kb)	12	9634592	9657302	22711	1	374443	ENST00000576948.5	0	ENSG00000256594	LOC374443	C-type lectin domain family 2 member D pseudogene
chr8	133202465	133203343	879	1.75376	1.41427	0.856862	0.354621	Intron (ENST00000377862.6/8840, intron 1 of 2)	8	133191137	133228064	36928	1	8840	ENST00000220856.6	11328	ENSG00000104415	CCN4	cellular communication network factor 4
chr21	44892438	44893663	1226	1.75361	2.0921	0.717636	0.396923	Promoter (<=1kb)	21	44885953	44894027	8075	2	3689	ENST00000475170.5	364	ENSG00000160255	ITGB2	integrin subunit beta 2
chr13	30572229	30573220	992	1.75361	1.82316	0.767098	0.381119	Intron (ENST00000405805.5/3146, intron 1 of 4)	13	30458747	30617597	158851	2	3146	ENST00000405805.5	44377	ENSG00000189403	HMGB1	high mobility group box 1
chr14	34059774	34060788	1015	1.75354	2.31205	0.684406	0.408076	Intron (ENST00000487915.6/102724945, intron 4 of 5)	14	34040097	34059300	19204	1	105370445	ENST00000555922.1	19677	NA	EGLN3-AS1	EGLN3 antisense RNA 1
chr7	50347427	50347925	499	1.75312	2.0328	0.728506	0.393371	Intron (ENST00000642219.1/10320, intron 3 of 3)	7	50367665	50369704	2040	1	10320	ENST00000492119.1	-19740	ENSG00000185811	IKZF1	IKAROS family zinc finger 1
chr3	71486974	71487620	647	1.75305	1.71542	0.785686	0.375411	Intron (ENST00000649528.3/27086, intron 3 of 20)	3	70959237	71493564	534328	2	27086	ENST00000648380.1	5944	ENSG00000114861	FOXP1	forkhead box P1
chr17	80737589	80739649	2061	1.75291	1.30088	0.879872	0.34824	Intron (ENST00000574767.5/57521, intron 4 of 11)	17	80743287	80966371	223085	1	57521	ENST00000575542.5	-3638	ENSG00000141564	RPTOR	regulatory associated protein of MTOR complex 1
chr5	172696997	172698066	1070	1.7529	2.94324	0.604687	0.436798	Promoter (<=1kb)	5	172690454	172697720	7267	2	107986479	ENST00000519976.1	0	NA	LOC107986479	uncharacterized LOC107986479
chr11	46916611	46918585	1975	1.75271	2.41455	0.667916	0.413782	Promoter (<=1kb)	11	46856717	46918550	61834	2	4038	ENST00000378623.6	0	ENSG00000134569	LRP4	LDL receptor related protein 4
chr2	96507739	96508828	1090	1.75229	3.05717	0.592342	0.441517	Promoter (<=1kb)	2	96497646	96508109	10464	2	93082	ENST00000435380.3	0	ENSG00000163121	NEURL3	neuralized E3 ubiquitin protein ligase 3
chr5	176629928	176631122	1195	1.75212	1.37331	0.863385	0.352796	Promoter (<=1kb)	5	176630618	176646595	15978	1	253314	ENST00000647833.1	0	ENSG00000175766	EIF4E1B	eukaryotic translation initiation factor 4E family member 1B
chr5	180328293	180329415	1123	1.75212	1.0729	0.967386	0.325336	Promoter (1-2kb)	5	180318844	180330934	12091	2	9945	ENST00000518185.1	1519	ENSG00000131459	GFPT2	glutamine-fructose-6-phosphate transaminase 2
chr8	123037529	123038361	833	1.75206	3.15921	0.583222	0.445054	Intron (ENST00000259512.9/79139, intron 1 of 7)	8	123041968	123084269	42302	1	93594	ENST00000520368.5	-3607	ENSG00000156787	TBC1D31	TBC1 domain family member 31
chr11	118906906	118907755	850	1.75182	2.90774	0.606915	0.435954	Promoter (<=1kb)	11	118902774	118908625	5852	2	283149	ENST00000527266.1	870	ENSG00000186174	BCL9L	BCL9 like
chr16	84548633	84549779	1147	1.75122	2.75632	0.622504	0.430121	Intron (ENST00000565079.5/57707, intron 1 of 3)	16	84489363	84554033	64671	2	57707	ENST00000565079.5	4254	ENSG00000140950	MEAK7	MTOR associated protein, eak-7 homolog
chr3	112332576	112334254	1679	1.75085	2.33824	0.675216	0.411242	Promoter (<=1kb)	3	112332841	112335996	3156	1	4345	ENST00000607516.1	0	ENSG00000091972	CD200	CD200 molecule
chr17	65039308	65040497	1190	1.75073	3.56363	0.552033	0.45749	Intron (ENST00000439174.7/10672, intron 2 of 3)	17	65013788	65055774	41987	2	10672	ENST00000541118.1	15277	ENSG00000120063	GNA13	G protein subunit alpha 13
chr19	49579981	49581247	1267	1.75044	3.2473	0.573762	0.44877	Promoter (<=1kb)	19	49555468	49580556	25089	2	51070	ENST00000596358.6	0	ENSG00000142546	NOSIP	nitric oxide synthase interacting protein
chr15	89243441	89244725	1285	1.75002	4.25997	0.513894	0.47346	Promoter (<=1kb)	15	89243945	89316471	72527	1	55215	ENST00000674831.1	0	ENSG00000140525	FANCI	FA complementation group I
chr5	119320924	119321588	665	1.74988	1.1484	0.929814	0.334914	Intron (ENST00000274456.6/25816, intron 1 of 1)	5	119333175	119393743	60569	1	25816	ENST00000513374.1	-11587	ENSG00000145779	TNFAIP8	TNF alpha induced protein 8
chr1	235253181	235254152	972	1.74988	1.13501	0.934776	0.333628	Intron (ENST00000366603.6/51742, intron 5 of 23)	1	235180139	235234492	54354	2	51742	ENST00000471257.5	-18689	ENSG00000054267	ARID4B	AT-rich interaction domain 4B
chr14	23562710	23563152	443	1.74988	1.02878	0.976163	0.323151	Promoter (<=1kb)	14	23561409	23563000	1592	2	8906	ENST00000556966.1	0	ENSG00000213983	AP1G2	adaptor related protein complex 1 subunit gamma 2
chr9	36102878	36103666	789	1.74988	1.01908	0.979857	0.322237	Intron (ENST00000377966.4/8434, intron 12 of 20)	9	36136536	36163913	27378	1	152007	ENST00000396613.7	-32870	ENSG00000122694	GLIPR2	GLI pathogenesis related 2
chr21	46253412	46254440	1029	1.74963	1.37936	0.859956	0.353754	Promoter (2-3kb)	21	46251515	46256986	5472	2	8888	ENST00000481113.1	2546	ENSG00000160294	MCM3AP	minichromosome maintenance complex component 3 associated protein
chr8	86354830	86357072	2243	1.74934	1.81038	0.763535	0.382227	Intron (ENST00000517970.6/11059, intron 1 of 24)	8	86333274	86343429	10156	2	105375624	ENST00000521326.2	-11401	ENSG00000254231	WWP1-AS1	WWP1 antisense RNA 1
chr9	129624351	129627254	2904	1.74858	5.30458	0.466334	0.49468	Promoter (<=1kb)	9	129626153	129636131	9979	1	28989	ENST00000611055.4	0	ENSG00000148335	NTMT1	N-terminal Xaa-Pro-Lys N-methyltransferase 1
chr19	16326126	16326965	840	1.74814	4.89452	0.483087	0.487029	Promoter (1-2kb)	19	16324840	16327260	2421	1	10365	ENST00000592003.1	1286	ENSG00000127528	KLF2	Kruppel like factor 2
chr22	38142974	38144144	1171	1.74783	2.19806	0.69721	0.403725	Promoter (<=1kb)	22	38129541	38143214	13674	2	8398	ENST00000452542.5	0	ENSG00000184381	PLA2G6	phospholipase A2 group VI
chr11	96012131	96012976	846	1.74776	2.31915	0.677243	0.41054	Intron (ENST00000524717.6/84441, intron 2 of 4)	11	95978755	96093520	114766	2	84441	ENST00000618849.1	80544	ENSG00000184384	MAML2	mastermind like transcriptional coactivator 2
chr1	32205261	32206208	948	1.74744	3.28503	0.569579	0.450429	Promoter (<=1kb)	1	32205671	32208548	2878	1	55721	ENST00000617816.1	0	ENSG00000160051	IQCC	IQ motif containing C
chr1	6701284	6702362	1079	1.74691	4.20188	0.515096	0.472943	Promoter (<=1kb)	1	6634170	6701816	67647	2	55735	ENST00000377577.10	0	ENSG00000007923	DNAJC11	DnaJ heat shock protein family (Hsp40) member C11
chr9	133709083	133709729	647	1.74664	1.13805	0.922605	0.336795	Intron (ENST00000439388.6/1757, intron 10 of 20)	9	133663564	133703701	40138	2	1757	ENST00000371868.5	-5382	ENSG00000123453	SARDH	sarcosine dehydrogenase
chr16	659962	661456	1495	1.74659	2.50958	0.649919	0.420144	Promoter (<=1kb)	16	661065	667829	6765	1	197335	ENST00000549024.5	0	ENSG00000161996	WDR90	WD repeat domain 90
chr19	39320351	39321529	1179	1.74659	2.3877	0.667185	0.414037	Promoter (<=1kb)	19	39306566	39320863	14298	2	57622	ENST00000248668.5	0	ENSG00000128011	LRFN1	leucine rich repeat and fibronectin type III domain containing 1
chr12	56160263	56160643	381	1.7464	2.49612	0.650844	0.419814	Promoter (<=1kb)	12	56160036	56162970	2935	1	4637	ENST00000546845.1	227	ENSG00000092841	MYL6	myosin light chain 6
chr17	17811836	17812998	1163	1.74617	1.92787	0.740373	0.389544	Promoter (<=1kb)	17	17811356	17813442	2087	2	6720	ENST00000578469.1	444	ENSG00000072310	SREBF1	sterol regulatory element binding transcription factor 1
chr16	2979923	2981017	1095	1.74591	4.13789	0.517606	0.471867	Promoter (<=1kb)	16	2968102	2980416	12315	2	9088	ENST00000431515.6	0	ENSG00000127564	PKMYT1	protein kinase, membrane associated tyrosine/threonine 1
chr9	136438523	136440188	1666	1.74529	4.39837	0.504687	0.47745	Promoter (<=1kb)	9	136428619	136439845	11227	2	56623	ENST00000371712.4	0	ENSG00000148384	INPP5E	inositol polyphosphate-5-phosphatase E
chr16	30896848	30897808	961	1.74512	3.05676	0.58835	0.44306	Promoter (<=1kb)	16	30896638	30903547	6910	1	1489	ENST00000395019.3	210	ENSG00000150281	CTF1	cardiotrophin 1
chr17	59565256	59566595	1340	1.74444	4.32056	0.507877	0.476061	Promoter (<=1kb)	17	59565558	59574259	8702	1	79665	ENST00000580218.5	0	ENSG00000108406	DHX40	DEAH-box helicase 40
chr20	62816218	62817192	975	1.74432	1.5445	0.808425	0.368589	Promoter (<=1kb)	20	62816244	62825030	8787	1	1299	ENST00000477612.5	0	ENSG00000092758	COL9A3	collagen type IX alpha 3 chain
chr3	13650394	13651070	677	1.74379	2.32752	0.673447	0.411855	Promoter (<=1kb)	3	13650696	13746629	95934	1	285375	ENST00000438915.1	0	ENSG00000224514	LINC00620	long intergenic non-protein coding RNA 620
chr8	103298563	103299620	1058	1.7437	3.05952	0.587229	0.443495	Promoter (<=1kb)	8	103243553	103298721	55169	2	105369147	ENST00000667164.1	0	ENSG00000247081	LOC105369147	uncharacterized LOC105369147
chr7	151243503	151246019	2517	1.74365	4.1558	0.515462	0.472786	Promoter (<=1kb)	7	151240422	151245513	5092	2	6604	ENST00000485592.5	0	ENSG00000082014	SMARCD3	SWI/SNF related, matrix associated, actin dependent regulator of chromatin, subfamily d, member 3
chr16	66589211	66590820	1610	1.74361	2.80829	0.61281	0.433734	Promoter (2-3kb)	16	66586909	66588275	1367	1	146225	ENST00000532362.1	2302	ENSG00000140932	CMTM2	CKLF like MARVEL transmembrane domain containing 2
chr6	142935026	142936436	1411	1.74343	2.64598	0.632452	0.42646	Intron (ENST00000012134.7/3097, intron 1 of 8)	6	142751469	142945031	193563	2	3097	ENST00000012134.7	8595	ENSG00000010818	HIVEP2	HIVEP zinc finger 2
chr4	109421859	109422965	1107	1.74328	1.145	0.918166	0.33796	Intron (ENST00000654972.1/100533182, intron 2 of 4)	4	109431443	109432777	1335	2	100533182	ENST00000667746.1	9812	ENSG00000247950	SEC24B-AS1	SEC24B antisense RNA 1
chr17	76103052	76104253	1202	1.7431	3.98352	0.523664	0.469285	Promoter (<=1kb)	17	76081016	76103787	22772	2	23265	ENST00000589210.6	0	ENSG00000182473	EXOC7	exocyst complex component 7
chr20	34312074	34313488	1415	1.74278	2.90691	0.601554	0.437988	Promoter (<=1kb)	20	34280270	34311802	31533	2	191	ENST00000538132.1	-272	ENSG00000101444	AHCY	adenosylhomocysteinase
chr2	174395209	174396345	1137	1.74255	4.13332	0.516017	0.472548	Promoter (<=1kb)	2	174395730	174427864	32135	1	79634	ENST00000437944.5	0	ENSG00000144306	SCRN3	secernin 3
chr8	124450092	124451347	1256	1.74213	4.9905	0.47604	0.490224	Promoter (<=1kb)	8	124450820	124453026	2207	1	55039	ENST00000328599.4	0	ENSG00000183665	TRMT12	tRNA methyltransferase 12 homolog
chr15	67833769	67834987	1219	1.74193	2.73057	0.61873	0.431522	Promoter (<=1kb)	15	67833082	67873866	40785	1	390598	ENST00000560577.1	687	ENSG00000188779	SKOR1	SKI family transcriptional corepressor 1
chr16	50693232	50694055	824	1.74185	1.70045	0.778987	0.377454	Promoter (<=1kb)	16	50693588	50734041	40454	1	64127	ENST00000646677.1	0	ENSG00000167207	NOD2	nucleotide binding oligomerization domain containing 2
chr12	120646652	120647524	873	1.74185	1.53117	0.817742	0.365844	Promoter (2-3kb)	12	120650085	120667032	16948	1	9478	ENST00000288616.7	-2561	ENSG00000157782	CABP1	calcium binding protein 1
chr18	12726765	12727779	1015	1.74176	1.30335	0.872019	0.3504	Promoter (2-3kb)	18	12724128	12725740	1613	1	56984	ENST00000588824.1	2637	ENSG00000128789	PSMG2	proteasome assembly chaperone 2
chr16	75233816	75234738	923	1.74176	1.30245	0.872296	0.350323	Promoter (1-2kb)	16	75229037	75236503	7467	2	9564	ENST00000563038.5	1765	ENSG00000050820	BCAR1	BCAR1 scaffold protein, Cas family member
chr20	47316778	47317982	1205	1.74176	1.17055	0.916394	0.338427	Promoter (<=1kb)	20	47318502	47320754	2253	1	100131496	ENST00000599904.2	-520	ENSG00000267882	LOC100131496	uncharacterized LOC100131496
chr1	109739757	109740953	1197	1.74163	3.96303	0.524112	0.469095	Promoter (<=1kb)	1	109733932	109740516	6585	2	2947	ENST00000256594.7	0	ENSG00000134202	GSTM3	glutathione S-transferase mu 3
chr3	8987676	8988333	658	1.74155	1.10204	0.91891	0.337764	Intron (ENST00000383836.8/9901, intron 21 of 21)	3	8992628	8994454	1827	2	9901	ENST00000491467.1	6121	ENSG00000196220	SRGAP3	SLIT-ROBO Rho GTPase activating protein 3
chr19	57814195	57815238	1044	1.74124	4.10492	0.516596	0.4723	Promoter (<=1kb)	19	57807082	57814913	7832	2	79818	ENST00000391701.1	0	ENSG00000178935	ZNF552	zinc finger protein 552
chr22	20523281	20524470	1190	1.7408	1.3855	0.852215	0.355929	Promoter (<=1kb)	22	20523643	20555148	31506	1	51586	ENST00000445189.5	0	ENSG00000099917	MED15	mediator complex subunit 15
chr11	2151377	2152367	991	1.74073	3.34857	0.56087	0.453912	Promoter (1-2kb)	11	2129112	2149603	20492	2	3481	ENST00000643349.1	-1774	ENSG00000167244	IGF2	insulin like growth factor 2
chr19	3284630	3285969	1340	1.74035	4.1641	0.513153	0.473779	Promoter (<=1kb)	19	3284762	3293401	8640	1	60680	ENST00000591483.1	0	ENSG00000161082	CELF5	CUGBP Elav-like family member 5
chr6	27693636	27694797	1162	1.74012	1.5783	0.804946	0.369622	Promoter (<=1kb)	6	27694035	27711354	17320	1	100507173	ENST00000628328.3	0	ENSG00000281706	LINC01012	long intergenic non-protein coding RNA 1012
chr7	100088421	100089690	1270	1.74011	3.19312	0.571784	0.449553	Promoter (<=1kb)	7	100088969	100090362	1394	1	10980	ENST00000465027.1	0	ENSG00000168090	COPS6	COP9 signalosome subunit 6
chr3	57164366	57165481	1116	1.73934	1.1517	0.921658	0.337043	Promoter (<=1kb)	3	57089982	57165353	75372	2	54756	ENST00000296318.12	0	ENSG00000144730	IL17RD	interleukin 17 receptor D
chr11	35342599	35343811	1213	1.73925	1.62767	0.796863	0.372036	Intron (ENST00000278379.9/6506, intron 1 of 10)	11	35286816	35352360	65545	2	6506	ENST00000645892.1	8549	ENSG00000110436	SLC1A2	solute carrier family 1 member 2
chr9	37753370	37754518	1149	1.7392	2.93	0.597508	0.439533	Promoter (<=1kb)	9	37753803	37778965	25163	1	158234	ENST00000377753.6	0	ENSG00000165275	TRMT10B	tRNA methyltransferase 10B
chr1	89854863	89856461	1599	1.73901	2.95101	0.594327	0.440753	Intron (ENST00000370453.5/55144, intron 3 of 3)	1	89846580	89933892	87313	1	55144	ENST00000441269.2	8283	ENSG00000171492	LRRC8D	leucine rich repeat containing 8 VRAC subunit D
chr1	111229475	111230205	731	1.73882	1.49905	0.820665	0.364989	Promoter (<=1kb)	1	111229692	111243439	13748	1	1117	ENST00000466741.5	0	ENSG00000064886	CHI3L2	chitinase 3 like 2
chr19	38544063	38544956	894	1.73882	1.11343	0.941241	0.331962	Intron (ENST00000359596.8/6261, intron 87 of 105)	19	38534760	38548372	13613	1	6261	ENST00000593322.1	9303	ENSG00000196218	RYR1	ryanodine receptor 1
chr16	84511312	84511724	413	1.73846	2.00959	0.71728	0.39704	Intron (ENST00000565079.5/57707, intron 1 of 3)	16	84479791	84504690	24900	2	57707	ENST00000570036.5	-6622	ENSG00000140950	MEAK7	MTOR associated protein, eak-7 homolog
chr11	118398699	118399512	814	1.73831	3.53663	0.546398	0.459795	Promoter (2-3kb)	11	118401602	118449569	47968	1	10632	ENST00000649464.1	-2090	ENSG00000167283	ATP5MG	ATP synthase membrane subunit g
chr19	48444953	48446401	1449	1.73812	5.2728	0.462298	0.496554	Promoter (<=1kb)	19	48445841	48451202	5362	1	83743	ENST00000598711.1	0	ENSG00000105447	GRWD1	glutamate rich WD repeat containing 1
chr9	34589758	34592134	2377	1.73758	2.88343	0.599762	0.438671	Promoter (<=1kb)	9	34551434	34590140	38707	2	1271	ENST00000610543.4	0	ENSG00000122756	CNTFR	ciliary neurotrophic factor receptor
chr22	19986519	19987668	1150	1.73749	2.75062	0.614804	0.432987	Promoter (<=1kb)	22	19971228	19987093	15866	2	421	ENST00000401994.5	0	ENSG00000099889	ARVCF	ARVCF delta catenin family member
chr1	26306195	26308333	2139	1.73714	5.38179	0.457424	0.498832	Promoter (<=1kb)	1	26281328	26306636	25309	2	91544	ENST00000314675.11	0	ENSG00000158062	UBXN11	UBX domain protein 11
chr8	22021701	22023017	1317	1.73704	1.34963	0.855311	0.355057	Promoter (1-2kb)	8	22024125	22033156	9032	1	10361	ENST00000520125.5	-1108	ENSG00000158806	NPM2	nucleophosmin/nucleoplasmin 2
chr4	40149635	40150622	988	1.73693	1.49377	0.820752	0.364963	Intron (ENST00000261435.11/55728, intron 16 of 17)	4	40191053	40243995	52943	1	399	ENST00000505618.5	-40431	ENSG00000168421	RHOH	ras homolog family member H
chr10	125895759	125896980	1222	1.73672	2.63213	0.62686	0.428512	Promoter (<=1kb)	10	125867129	125896436	29308	2	55760	ENST00000415732.1	0	ENSG00000089876	DHX32	DEAH-box helicase 32 (putative)
chr9	124657750	124659641	1892	1.73577	2.76219	0.611983	0.434044	Promoter (<=1kb)	9	124658467	124698631	40165	1	100379345	ENST00000429139.1	0	ENSG00000224020	MIR181A2HG	MIR181A2 host gene
chr17	40443226	40445267	2042	1.73546	3.08653	0.579857	0.446371	Promoter (<=1kb)	17	40443450	40457725	14276	1	3487	ENST00000269593.5	0	ENSG00000141753	IGFBP4	insulin like growth factor binding protein 4
chr1	3649490	3650658	1169	1.73528	3.35366	0.556794	0.455557	Promoter (<=1kb)	1	3630767	3650058	19292	2	49856	ENST00000378322.7	0	ENSG00000116213	WRAP73	WD repeat containing, antisense to TP73
chr7	143239535	143241185	1651	1.73486	1.29851	0.869099	0.351208	Promoter (2-3kb)	7	143244093	143265092	21000	1	373156	ENST00000436038.5	-2908	ENSG00000197448	GSTK1	glutathione S-transferase kappa 1
chr16	31200686	31203022	2337	1.73435	4.9854	0.471863	0.492133	Promoter (<=1kb)	16	31201885	31203452	1568	1	100652740	ENST00000561916.2	0	ENSG00000261359	PYCARD-AS1	PYCARD antisense RNA 1
chr4	7102136	7104033	1898	1.73429	4.1367	0.511321	0.47457	Promoter (<=1kb)	4	7093776	7103394	9619	2	730971	ENST00000663544.1	0	NA	LINC02447	long intergenic non-protein coding RNA 2447
chr17	1267543	1268904	1362	1.73396	3.26897	0.562932	0.453084	Promoter (1-2kb)	17	1270444	1271815	1372	1	727857	ENST00000391429.2	-1540	ENSG00000205899	BHLHA9	basic helix-loop-helix family member a9
chr9	96777312	96778750	1439	1.73391	4.26005	0.504865	0.477373	Promoter (<=1kb)	9	96754553	96778087	23535	2	22869	ENST00000223428.9	0	ENSG00000081386	ZNF510	zinc finger protein 510
chr4	153573600	153574916	1317	1.73357	2.58661	0.630859	0.427043	Intron (ENST00000409663.7/23240, intron 7 of 34)	4	153583538	153586389	2852	1	23240	ENST00000509565.1	-8622	ENSG00000121210	TMEM131L	transmembrane 131 like
chr7	25619747	25620917	1171	1.73338	1.56703	0.800272	0.371015	Promoter (<=1kb)	7	25593338	25620441	27104	2	646588	ENST00000659793.1	0	ENSG00000223561	LOC646588	uncharacterized LOC646588
chr4	17816862	17817887	1026	1.73338	1.39298	0.84512	0.357939	Promoter (<=1kb)	4	17817232	17823147	5916	1	64151	ENST00000509719.1	0	ENSG00000109805	NCAPG	non-SMC condensin I complex subunit G
chr11	6737723	6738706	984	1.73326	2.20992	0.683928	0.40824	Intron (ENST00000526769.3/ENST00000526769.3, intron 1 of 1)	11	6714610	6721880	7271	2	387751	ENST00000531871.3	-15843	ENSG00000254838	GVINP1	GTPase, very large interferon inducible pseudogene 1
chr13	48094509	48095778	1270	1.73287	4.04858	0.514923	0.473017	Promoter (<=1kb)	13	48075724	48095104	19381	2	29079	ENST00000258648.7	0	ENSG00000136146	MED4	mediator complex subunit 4
chr3	66407528	66408508	981	1.73278	1.36157	0.849209	0.356779	Promoter (1-2kb)	3	66378798	66406213	27416	2	26018	ENST00000496559.6	-1315	ENSG00000144749	LRIG1	leucine rich repeats and immunoglobulin like domains 1
chr2	11692839	11693634	796	1.73278	1.36145	0.849241	0.35677	Intron (ENST00000449576.6/23175, intron 1 of 21)	2	11681461	11683328	1868	1	100506405	ENST00000435175.1	11378	ENSG00000228496	LOC100506405	uncharacterized LOC100506405
chr18	12775092	12776541	1450	1.73274	3.05487	0.58073	0.446029	Promoter (<=1kb)	18	12739490	12775821	36332	2	100996324	ENST00000657716.1	0	NA	LINC01882	long intergenic non-protein coding RNA 1882
chr15	78112974	78113921	948	1.73237	1.71495	0.769621	0.380337	Promoter (1-2kb)	15	78105188	78111266	6079	2	10518	ENST00000557818.1	-1708	ENSG00000136425	CIB2	calcium and integrin binding family member 2
chr10	100986906	100987937	1032	1.73237	3.736	0.530465	0.466414	Promoter (<=1kb)	10	100987367	100993363	5997	1	56652	ENST00000476766.5	0	ENSG00000107815	TWNK	twinkle mtDNA helicase
chr17	82647543	82649175	1633	1.73099	4.99947	0.469844	0.493061	Promoter (<=1kb)	17	82614562	82648444	33883	2	56270	ENST00000392325.9	0	ENSG00000141580	WDR45B	WD repeat domain 45B
chr12	1605141	1606220	1080	1.73098	2.04673	0.706282	0.400683	Intron (ENST00000539198.5/81029, intron 1 of 3)	12	1616660	1631323	14664	1	81029	ENST00000538854.1	-10440	ENSG00000111186	WNT5B	Wnt family member 5B
chr22	36286480	36287344	865	1.73098	1.89483	0.733179	0.391857	Promoter (<=1kb)	22	36286847	36286907	61	2	102465491	ENST00000622122.1	0	ENSG00000278420	MIR6819	microRNA 6819
chr9	131178075	131179059	985	1.7308	1.37968	0.842839	0.358589	Promoter (<=1kb)	9	131178349	131201690	23342	1	8021	ENST00000651334.1	0	ENSG00000126883	NUP214	nucleoporin 214
chr17	81518977	81519757	781	1.73034	3.51112	0.54313	0.461141	Promoter (<=1kb)	17	81519040	81527776	8737	1	25794	ENST00000442532.1	0	ENSG00000186765	FSCN2	fascin actin-bundling protein 2, retinal
chr13	26050752	26052286	1535	1.73011	2.21533	0.676448	0.410815	Promoter (<=1kb)	13	26044597	26052016	7420	2	387914	ENST00000319420.4	0	ENSG00000180730	SHISA2	shisa family member 2
chr16	58684112	58685169	1058	1.73011	1.58408	0.794052	0.37288	Promoter (<=1kb)	16	58665109	58684723	19615	2	55238	ENST00000570101.5	0	ENSG00000103042	SLC38A7	solute carrier family 38 member 7
chr7	151017822	151019031	1210	1.72981	4.09038	0.510772	0.474807	Promoter (<=1kb)	7	151015172	151018801	3630	2	285973	ENST00000611177.1	0	ENSG00000181652	ATG9B	autophagy related 9B
chr17	67725029	67726121	1093	1.72963	2.57378	0.627111	0.428419	Promoter (<=1kb)	17	67724109	67727028	2920	1	25926	ENST00000580914.1	920	ENSG00000130935	NOL11	nucleolar protein 11
chr5	140042463	140043825	1363	1.72901	2.67971	0.615509	0.432724	Promoter (<=1kb)	5	139846779	140043299	196521	2	9542	ENST00000541337.5	0	ENSG00000158458	NRG2	neuregulin 2
chr21	45438971	45439859	889	1.72901	2.63967	0.620519	0.430857	Intron (ENST00000651438.1/80781, intron 2 of 41)	21	45419716	45425070	5355	2	378832	ENST00000485206.1	-13901	ENSG00000183535	COL18A1-AS1	COL18A1 antisense RNA 1
chr22	40518780	40520079	1300	1.72901	2.15283	0.690424	0.406023	Promoter (1-2kb)	22	40521800	40526707	4908	1	101927257	ENST00000417123.1	-1721	ENSG00000232564	MRTFA-AS1	MRTFA antisense RNA 1
chr10	102229866	102231993	2128	1.72894	4.15098	0.507621	0.476173	Promoter (<=1kb)	10	102230186	102232083	1898	2	5309	ENST00000539804.1	90	ENSG00000107859	PITX3	paired like homeodomain 3
chr16	30786240	30787632	1393	1.72891	1.55009	0.797725	0.371777	Promoter (<=1kb)	16	30778456	30787205	8750	2	23361	ENST00000262525.6	0	ENSG00000102870	ZNF629	zinc finger protein 629
chr17	79009079	79010292	1214	1.72865	3.89321	0.520291	0.47072	Promoter (<=1kb)	17	78991716	79009764	18049	2	124583	ENST00000392446.10	0	ENSG00000171302	CANT1	calcium activated nucleotidase 1
chr17	80544439	80545574	1136	1.72847	2.66986	0.618271	0.431693	Promoter (<=1kb)	17	80544819	80858124	313306	1	57521	ENST00000574767.5	0	ENSG00000141564	RPTOR	regulatory associated protein of MTOR complex 1
chr5	113487405	113489650	2246	1.72815	2.16648	0.686492	0.407363	Promoter (<=1kb)	5	113022106	113488453	466348	2	4163	ENST00000408903.7	0	ENSG00000171444	MCC	MCC regulator of WNT signaling pathway
chr17	32319013	32319908	896	1.72815	2.121	0.693903	0.404843	Intron (ENST00000269051.9/162494, intron 8 of 8)	17	32324431	32360700	36270	1	7756	ENST00000581915.5	-4523	ENSG00000010244	ZNF207	zinc finger protein 207
chr17	30831445	30832522	1078	1.72802	3.45859	0.545592	0.460127	Promoter (<=1kb)	17	30831966	30895869	63904	1	79915	ENST00000321990.5	0	ENSG00000176208	ATAD5	ATPase family AAA domain containing 5
chr2	69893267	69894715	1449	1.72762	2.85369	0.597804	0.439419	Promoter (<=1kb)	2	69893956	69905236	11281	1	11017	ENST00000244227.8	0	ENSG00000124380	SNRNP27	small nuclear ribonucleoprotein U4/U6.U5 subunit 27
chr8	23083900	23084934	1035	1.72715	1.12536	0.91615	0.338491	Promoter (<=1kb)	8	23084355	23103558	19204	1	254896	ENST00000397703.6	0	ENSG00000284948	LOC254896	uncharacterized LOC254896
chr7	130903498	130904414	917	1.72711	1.28318	0.868978	0.351241	Intron (ENST00000447430.1/100506860, intron 2 of 4)	7	130881762	130913176	31415	2	378805	ENST00000447307.5	8762	ENSG00000231721	LINC-PINT	long intergenic non-protein coding RNA, p53 induced transcript
chr7	112798465	112799635	1171	1.72708	2.63799	0.615856	0.432594	Intron (ENST00000652784.1/101928012, intron 5 of 6)	7	112767136	112790423	23288	2	64418	ENST00000447395.5	-8042	ENSG00000146802	TMEM168	transmembrane protein 168
chr5	139310422	139312060	1639	1.72708	1.75267	0.756012	0.384582	Promoter (<=1kb)	5	139310043	139330437	20395	1	9782	ENST00000505625.5	379	ENSG00000015479	MATR3	matrin 3
chr17	74922958	74924624	1667	1.72705	2.31369	0.662992	0.415508	Promoter (<=1kb)	17	74916083	74923255	7173	2	124590	ENST00000614341.5	0	ENSG00000182040	USH1G	USH1 protein network component sans
chr19	57191206	57192163	958	1.72605	4.11567	0.507621	0.476173	Promoter (<=1kb)	19	57191500	57222846	31347	1	9422	ENST00000263095.10	0	ENSG00000083844	ZNF264	zinc finger protein 264
chr7	130485956	130486875	920	1.72598	2.39284	0.650859	0.419808	Promoter (<=1kb)	7	130486171	130506292	20122	1	4232	ENST00000341441.9	0	ENSG00000106484	MEST	mesoderm specific transcript
chr19	41784955	41786143	1189	1.72498	1.49533	0.803278	0.370118	Promoter (<=1kb)	19	41757898	41786893	28996	2	112268252	ENST00000601409.1	750	NA	LOC112268252	uncharacterized LOC112268252
chr1	173430733	173431818	1086	1.72498	1.21247	0.884073	0.347091	Intron (ENST00000367716.3/101928673, intron 1 of 1)	1	173439893	173442020	2128	2	7292	ENST00000654140.1	10202	ENSG00000117586	TNFSF4	TNF superfamily member 4
chr14	92750069	92750988	920	1.72494	2.3065	0.662779	0.415583	Promoter (1-2kb)	14	92703844	92748679	44836	2	5641	ENST00000393218.6	-1390	ENSG00000100600	LGMN	legumain
chr17	7280492	7282178	1687	1.72451	4.45249	0.490641	0.483644	Promoter (<=1kb)	17	7281718	7288257	6540	1	6517	ENST00000317370.13	0	ENSG00000181856	SLC2A4	solute carrier family 2 member 4
chr19	45250686	45252183	1498	1.72425	3.02663	0.578269	0.446994	Promoter (<=1kb)	19	45251271	45305284	54014	1	57787	ENST00000262891.9	0	ENSG00000007047	MARK4	microtubule affinity regulating kinase 4
chr2	113390087	113391293	1207	1.72393	2.32432	0.659519	0.416732	Intron (ENST00000653674.1/101927400, intron 2 of 3)	2	113424495	113425324	830	1	101927400	ENST00000422178.1	-33202	NA	LOC101927400	uncharacterized LOC101927400
chr10	73109893	73111097	1205	1.72393	1.9143	0.726649	0.393974	Promoter (<=1kb)	10	73110375	73126657	16283	1	25961	ENST00000617744.4	0	ENSG00000166321	NUDT13	nudix hydrolase 13
chr22	40370108	40371370	1263	1.72384	4.18098	0.503117	0.478136	Promoter (<=1kb)	22	40370591	40406223	35633	1	27352	ENST00000457767.5	0	ENSG00000100359	SGSM3	small G protein signaling modulator 3
chr12	53200620	53201168	549	1.72373	1.64767	0.772492	0.37945	Promoter (<=1kb)	12	53197872	53201300	3429	2	3695	ENST00000552935.5	132	ENSG00000139626	ITGB7	integrin subunit beta 7
chr6	28349628	28350667	1040	1.7235	2.91285	0.589091	0.442773	Promoter (<=1kb)	6	28349947	28369172	19226	1	80317	ENST00000252211.7	0	ENSG00000189298	ZKSCAN3	zinc finger with KRAB and SCAN domains 3
chr1	39025780	39027335	1556	1.72322	4.00392	0.511789	0.474367	Promoter (<=1kb)	1	39026318	39034636	8319	1	4725	ENST00000372967.3	0	ENSG00000168653	NDUFS5	NADH:ubiquinone oxidoreductase subunit S5
chr4	139560594	139561154	561	1.72294	2.27136	0.668668	0.413519	Intron (ENST00000608795.5/80854, intron 3 of 4)	4	139532579	139556769	24191	2	80854	ENST00000404104.7	-3825	ENSG00000145391	SETD7	SET domain containing 7, histone lysine methyltransferase
chr22	30245787	30247101	1315	1.72238	2.0533	0.699854	0.402835	Promoter (<=1kb)	22	30240453	30246759	6307	2	3976	ENST00000249075.4	0	ENSG00000128342	LIF	LIF interleukin 6 family cytokine
chr15	83069105	83069514	410	1.72238	2.01959	0.705532	0.400934	Promoter (1-2kb)	15	83067335	83067415	81	1	100616404	ENST00000584082.1	1770	ENSG00000263643	MIR4515	microRNA 4515
chr18	63197319	63198215	897	1.72215	1.62821	0.775727	0.378454	Intron (ENST00000678134.1/596, intron 2 of 2)	18	63128212	63161869	33658	2	596	ENST00000590515.1	-35450	ENSG00000171791	BCL2	BCL2 apoptosis regulator
chr16	30409244	30409687	444	1.72167	2.56099	0.626323	0.42871	Promoter (1-2kb)	16	30408031	30414609	6579	1	51333	ENST00000564550.1	1213	ENSG00000179965	ZNF771	zinc finger protein 771
chr22	39932229	39934174	1946	1.72085	2.63396	0.616456	0.43237	Intron (ENST00000344138.9/9402, intron 1 of 7)	22	39926649	39948481	21833	1	9402	ENST00000461082.1	5580	ENSG00000100351	GRAP2	GRB2 related adaptor protein 2
chr9	92807608	92809461	1854	1.72056	3.10659	0.567114	0.45141	Promoter (<=1kb)	9	92809388	92888693	79306	1	138649	ENST00000473204.5	0	ENSG00000187984	ANKRD19P	ankyrin repeat domain 19, pseudogene
chr5	80191231	80193099	1869	1.72054	3.67697	0.52708	0.467839	Intron (ENST00000509193.5/256987, intron 2 of 12)	5	80156994	80167180	10187	2	256987	ENST00000502747.1	-24051	ENSG00000164300	SERINC5	serine incorporator 5
chr17	4899185	4901816	2632	1.72045	5.77324	0.43399	0.510039	Promoter (<=1kb)	17	4899418	4900799	1382	1	100130311	ENST00000521575.1	0	ENSG00000205710	C17orf107	chromosome 17 open reading frame 107
chr3	161371523	161373030	1508	1.72037	3.04578	0.573582	0.448841	Promoter (<=1kb)	3	161344792	161372880	28089	2	165679	ENST00000359175.8	0	ENSG00000196542	SPTSSB	serine palmitoyltransferase small subunit B
chr7	100049257	100050459	1203	1.71931	3.69381	0.525926	0.468327	Promoter (<=1kb)	7	100049774	100065038	15265	1	7589	ENST00000456748.6	0	ENSG00000166529	ZSCAN21	zinc finger and SCAN domain containing 21
chr14	52949630	52951894	2265	1.71924	2.55892	0.624292	0.429459	Promoter (<=1kb)	14	52857268	52951035	93768	2	10979	ENST00000395631.6	0	ENSG00000073712	FERMT2	FERM domain containing kindlin 2
chr1	224115744	224116542	799	1.71918	1.86233	0.726942	0.393879	Promoter (1-2kb)	1	224114218	224131021	16804	1	23219	ENST00000519894.1	1526	ENSG00000143756	FBXO28	F-box protein 28
chr20	37384277	37385411	1135	1.71918	1.44355	0.818465	0.365632	Promoter (<=1kb)	20	37384323	37394174	9852	1	6714	ENST00000472968.1	0	ENSG00000197122	SRC	SRC proto-oncogene, non-receptor tyrosine kinase
chr12	7091960	7092941	982	1.71914	1.37864	0.830396	0.362161	Promoter (<=1kb)	12	7080214	7092441	12228	2	715	ENST00000540394.5	0	ENSG00000159403	C1R	complement C1r
chr15	40252448	40253401	954	1.71914	1.31978	0.847051	0.357391	Promoter (<=1kb)	15	40252548	40265974	13427	1	56924	ENST00000559617.5	0	ENSG00000137843	PAK6	p21 (RAC1) activated kinase 6
chr17	15260471	15261363	893	1.71914	1.02518	0.949747	0.329787	Promoter (<=1kb)	17	15229779	15260761	30983	2	5376	ENST00000675551.1	0	ENSG00000109099	PMP22	peripheral myelin protein 22
chr2	23380717	23381292	576	1.71907	1.05099	0.929018	0.335121	Promoter (<=1kb)	2	23375364	23381255	5892	2	105374323	ENST00000430051.1	0	NA	LINC02923	long intergenic non-protein coding RNA 2923
chr9	62800833	62802871	2039	1.71889	2.95034	0.583175	0.445073	Promoter (<=1kb)	9	62801461	62810186	8726	1	103352539	ENST00000427509.5	0	ENSG00000238113	LINC01410	long intergenic non-protein coding RNA 1410
chr16	2785014	2786014	1001	1.71838	2.62063	0.615864	0.432591	Promoter (<=1kb)	16	2784944	2786605	1662	2	260429	ENST00000571674.1	591	ENSG00000103355	PRSS33	serine protease 33
chr5	139470300	139471608	1309	1.71824	2.24955	0.666014	0.414447	Promoter (<=1kb)	5	139471004	139473700	2697	1	111064649	ENST00000637503.2	0	ENSG00000283288	SMIM33	small integral membrane protein 33
chr3	10263482	10264981	1500	1.71813	3.56904	0.531627	0.465926	Intron (ENST00000287652.8/9797, intron 3 of 7)	3	10270920	10279165	8246	1	9797	ENST00000426850.1	-5939	ENSG00000157014	TATDN2	TatD DNase domain containing 2
chr19	57526859	57527949	1091	1.71781	4.50869	0.484402	0.486437	Promoter (<=1kb)	19	57527325	57540763	13439	1	256051	ENST00000240719.7	0	ENSG00000121406	ZNF549	zinc finger protein 549
chr19	51926618	51927781	1164	1.71781	4.06271	0.505856	0.476941	Promoter (<=1kb)	19	51927147	51936125	8979	1	79898	ENST00000593395.1	0	ENSG00000176024	ZNF613	zinc finger protein 613
chr11	65786269	65787468	1200	1.71779	1.90597	0.718104	0.396769	Promoter (<=1kb)	11	65787063	65797214	10152	1	5017	ENST00000335987.8	0	ENSG00000172818	OVOL1	ovo like transcriptional repressor 1
chr8	122489430	122490486	1057	1.71779	1.1719	0.900188	0.342734	Promoter (<=1kb)	8	122485515	122489815	4301	2	107986972	ENST00000530350.2	0	NA	LOC107986972	uncharacterized LOC107986972
chr7	44240918	44241569	652	1.71739	1.29762	0.852675	0.3558	Promoter (<=1kb)	7	44225835	44242306	16472	2	816	ENST00000433930.1	737	ENSG00000058404	CAMK2B	calcium/calmodulin dependent protein kinase II beta
chr4	102559865	102560917	1053	1.71739	1.19295	0.8865	0.34643	Promoter (2-3kb)	4	102557105	102580588	23484	1	4790	ENST00000510638.1	2760	ENSG00000109320	NFKB1	nuclear factor kappa B subunit 1
chr19	57819252	57820327	1076	1.71716	4.4747	0.485824	0.485798	Promoter (<=1kb)	19	57819721	57843488	23768	1	100293516	ENST00000651253.2	0	ENSG00000269343	ZNF587B	zinc finger protein 587B
chr7	131026788	131028028	1241	1.71699	2.42723	0.641541	0.423156	Intron (ENST00000642963.1/378805, intron 2 of 6)	7	130944198	131052493	108296	2	378805	ENST00000643373.1	24465	ENSG00000231721	LINC-PINT	long intergenic non-protein coding RNA, p53 induced transcript
chr9	126860128	126861366	1239	1.71698	3.90657	0.513032	0.473832	Promoter (<=1kb)	9	126860665	126885878	25214	1	403341	ENST00000319119.4	0	ENSG00000177125	ZBTB34	zinc finger and BTB domain containing 34
chr19	48110307	48111308	1002	1.71693	1.89041	0.723126	0.395123	Promoter (<=1kb)	19	48047843	48110817	62975	2	8605	ENST00000599111.5	0	ENSG00000105499	PLA2G4C	phospholipase A2 group IVC
chr12	110894306	110894943	638	1.71672	1.10968	0.905642	0.341276	Intron (ENST00000545036.5/160762, intron 8 of 10)	12	110913133	110914290	1158	2	4633	ENST00000549029.1	19347	ENSG00000111245	MYL2	myosin light chain 2
chr19	52048326	52049624	1299	1.71654	5.27187	0.451675	0.501543	Promoter (<=1kb)	19	52031378	52048838	17461	2	9668	ENST00000221315.10	0	ENSG00000256087	ZNF432	zinc finger protein 432
chr19	12035291	12036195	905	1.71645	2.27414	0.657401	0.417481	Promoter (<=1kb)	19	12035823	12046275	10453	1	101928464	ENST00000591898.1	0	ENSG00000219665	ZNF433-AS1	ZNF433 and ZNF878 antisense RNA 1
chr6	149938243	149939051	809	1.71627	2.67441	0.608725	0.435271	Promoter (2-3kb)	6	149942014	149949235	7222	1	80328	ENST00000367351.4	-2963	ENSG00000131015	ULBP2	UL16 binding protein 2
chr1	155126644	155128315	1672	1.71577	3.54189	0.532856	0.465411	Promoter (<=1kb)	1	155127876	155134857	6982	1	1942	ENST00000368406.2	0	ENSG00000169242	EFNA1	ephrin A1
chr16	57519507	57520470	964	1.71572	1.49372	0.798696	0.371486	Promoter (2-3kb)	16	57512387	57516582	4196	2	92922	ENST00000569068.1	-2925	ENSG00000135736	CCDC102A	coiled-coil domain containing 102A
chr20	25853607	25854338	732	1.71572	1.32726	0.84297	0.358551	Promoter (<=1kb)	20	25773972	25854033	80062	2	101926935	ENST00000666588.1	0	NA	LOC101926935	uncharacterized LOC101926935
chr3	71432231	71433453	1223	1.71516	2.51004	0.623852	0.429622	Intron (ENST00000649528.3/27086, intron 3 of 20)	3	71318202	71469567	151366	2	27086	ENST00000649145.1	36114	ENSG00000114861	FOXP1	forkhead box P1
chr19	47436100	47437250	1151	1.71516	1.81467	0.73363	0.391712	Intron (ENST00000236877.11/6543, intron 8 of 9)	19	47430235	47432568	2334	2	6543	ENST00000600576.1	-3532	ENSG00000118160	SLC8A2	solute carrier family 8 member A2
chr3	127628879	127630512	1634	1.71477	2.9875	0.576083	0.447854	Promoter (<=1kb)	3	127620106	127629049	8944	2	107986126	ENST00000650122.1	0	NA	LOC107986126	uncharacterized LOC107986126
chr16	89686459	89687422	964	1.71463	4.53762	0.481659	0.487674	Promoter (<=1kb)	16	89682620	89686569	3950	2	105371416	ENST00000567544.1	0	ENSG00000260259	LINC02166	long intergenic non-protein coding RNA 2166
chr19	4911470	4912275	806	1.71454	3.42613	0.539931	0.462463	Promoter (1-2kb)	19	4910375	4960952	50578	1	29128	ENST00000616255.1	1095	ENSG00000276043	UHRF1	ubiquitin like with PHD and ring finger domains 1
chr16	53207849	53208693	845	1.71452	1.05071	0.927219	0.33559	Promoter (<=1kb)	16	53207989	53326856	118868	1	80205	ENST00000565803.2	0	ENSG00000177200	CHD9	chromodomain helicase DNA binding protein 9
chr3	150864873	150865966	1094	1.71391	1.63885	0.768535	0.380673	Intron (ENST00000663257.1/105374155, intron 2 of 2)	3	150852484	151080726	228243	1	116933	ENST00000476886.5	12389	NA	CLRN1-AS1	CLRN1 antisense RNA 1
chr14	91177064	91178058	995	1.71391	1.58643	0.780041	0.377131	Promoter (1-2kb)	14	91175749	91181267	5519	1	80017	ENST00000520130.1	1315	ENSG00000133943	DGLUCY	D-glutamate cyclase
chr19	40598413	40599038	626	1.71377	2.18183	0.672283	0.412259	Promoter (<=1kb)	19	40598525	40605466	6942	1	8425	ENST00000594537.2	0	ENSG00000090006	LTBP4	latent transforming growth factor beta binding protein 4
chr19	53467176	53468361	1186	1.71376	4.40745	0.486787	0.485366	Promoter (<=1kb)	19	53467733	53496255	28523	1	126017	ENST00000396403.9	0	ENSG00000198346	ZNF813	zinc finger protein 813
chr22	42499710	42501029	1320	1.71366	4.51139	0.482143	0.487455	Promoter (<=1kb)	22	42500568	42512544	11977	1	94009	ENST00000652221.1	0	ENSG00000172250	SERHL	serine hydrolase like (pseudogene)
chr20	58980774	58982310	1537	1.71303	4.3294	0.490454	0.483727	Promoter (<=1kb)	20	58916000	58981169	65170	2	107985382	ENST00000644133.1	0	NA	LOC107985382	uncharacterized LOC107985382
chr17	7650243	7651726	1484	1.71288	3.20117	0.553216	0.457009	Promoter (<=1kb)	17	7650926	7657770	6845	1	482	ENST00000250111.9	0	ENSG00000129244	ATP1B2	ATPase Na+/K+ transporting subunit beta 2
chr13	98517253	98518323	1071	1.71278	1.66656	0.764787	0.381837	Promoter (<=1kb)	13	98455982	98519267	63286	2	8428	ENST00000444574.1	944	ENSG00000102572	STK24	serine/threonine kinase 24
chr4	108118467	108119167	701	1.71272	2.10711	0.681278	0.40915	Intron (ENST00000379951.6/51176, intron 3 of 9)	4	108048169	108083413	35245	2	51176	ENST00000505379.5	-35054	ENSG00000138795	LEF1	lymphoid enhancer binding factor 1
chr16	711661	712141	481	1.71272	1.77553	0.739832	0.389717	Promoter (2-3kb)	16	715118	719655	4538	1	79006	ENST00000568223.7	-2977	ENSG00000103260	METRN	meteorin, glial cell differentiation regulator
chr17	78979335	78980368	1034	1.71246	1.45908	0.797697	0.371785	Promoter (<=1kb)	17	78971238	78979918	8681	2	3959	ENST00000591778.5	0	ENSG00000108679	LGALS3BP	galectin 3 binding protein
chr5	80238285	80239529	1245	1.71246	1.22365	0.864248	0.352555	Intron (ENST00000509193.5/256987, intron 1 of 12)	5	80177315	80255198	77884	2	256987	ENST00000513907.1	15669	ENSG00000164300	SERINC5	serine incorporator 5
chr1	223831781	223832994	1214	1.71189	2.8338	0.589543	0.442598	Intron (ENST00000343537.12/7159, intron 1 of 17)	1	223806911	223826069	19159	2	7159	ENST00000473135.5	-5712	ENSG00000143514	TP53BP2	tumor protein p53 binding protein 2
chr4	48129397	48130000	604	1.71157	1.83492	0.727722	0.393625	Intron (ENST00000264316.9/7294, intron 1 of 14)	4	48089385	48134229	44845	2	7294	ENST00000510457.1	4229	ENSG00000074966	TXK	TXK tyrosine kinase
chr15	88894206	88895639	1434	1.71138	3.16939	0.55618	0.455806	Promoter (<=1kb)	15	88877294	88895544	18251	2	145864	ENST00000359595.8	0	ENSG00000140511	HAPLN3	hyaluronan and proteoglycan link protein 3
chr1	11245834	11246971	1138	1.71118	1.59342	0.77251	0.379444	Intron (ENST00000361445.9/2475, intron 8 of 57)	1	11106535	11262551	156017	2	2475	ENST00000361445.9	15580	ENSG00000198793	MTOR	mechanistic target of rapamycin kinase
chr19	6392776	6394059	1284	1.71065	5.19656	0.451662	0.501549	Promoter (<=1kb)	19	6392921	6392983	63	2	102465473	ENST00000611058.1	0	ENSG00000273758	MIR6790	microRNA 6790
chr2	69012646	69014006	1361	1.71053	1.05682	0.923456	0.336572	Promoter (<=1kb)	2	69013176	69091098	77923	1	84168	ENST00000481119.2	0	ENSG00000169604	ANTXR1	ANTXR cell adhesion molecule 1
chr14	64294178	64295318	1141	1.71041	2.81465	0.589748	0.442519	Promoter (<=1kb)	14	64084232	64294410	210179	2	2100	ENST00000556275.5	0	ENSG00000140009	ESR2	estrogen receptor 2
chr17	41929981	41931194	1214	1.7103	5.12528	0.454278	0.500313	Promoter (<=1kb)	17	41910239	41930542	20304	2	47	ENST00000592970.1	0	ENSG00000131473	ACLY	ATP citrate lyase
chr9	136532981	136534246	1266	1.71025	3.65756	0.523047	0.469547	Intron (ENST00000651671.1/4851, intron 2 of 33)	9	136522572	136523898	1327	2	4851	ENST00000491649.2	-9083	ENSG00000148400	NOTCH1	notch receptor 1
chr9	89463692	89464962	1271	1.71023	3.90442	0.509058	0.475549	Intron (ENST00000339861.8/10507, intron 1 of 18)	9	89377237	89455953	78717	2	10507	ENST00000356444.6	-7739	ENSG00000187764	SEMA4D	semaphorin 4D
chr9	136225192	136226485	1294	1.71007	3.89129	0.509518	0.47535	Promoter (<=1kb)	9	136211264	136224877	13614	2	169714	ENST00000455222.1	-315	ENSG00000165661	QSOX2	quiescin sulfhydryl oxidase 2
chr2	64204063	64204931	869	1.7098	1.41903	0.814519	0.36679	Promoter (<=1kb)	2	64186390	64204493	18104	2	150992	ENST00000648144.1	0	ENSG00000230923	LINC00309	long intergenic non-protein coding RNA 309
chr19	11587387	11588381	995	1.7098	1.28411	0.85264	0.355809	Intron (ENST00000593279.5/199692, intron 4 of 4)	19	11577160	11579008	1849	2	54	ENST00000591319.1	-8379	ENSG00000102575	ACP5	acid phosphatase 5, tartrate resistant
chr8	27837406	27838331	926	1.70966	2.06355	0.690299	0.406065	Promoter (<=1kb)	8	27809624	27837817	28194	2	55872	ENST00000301905.9	0	ENSG00000168078	PBK	PDZ binding kinase
chr22	23716620	23717787	1168	1.70958	3.27249	0.547477	0.459352	Promoter (<=1kb)	22	23638487	23717321	78835	2	91316	ENST00000451837.5	0	ENSG00000228315	GUSBP11	GUSB pseudogene 11
chr3	50154413	50155506	1094	1.70955	4.27693	0.490622	0.483652	Promoter (<=1kb)	3	50155045	50182766	27722	1	6405	ENST00000414301.5	0	ENSG00000001617	SEMA3F	semaphorin 3F
chr17	42193824	42194941	1118	1.7091	2.90839	0.579705	0.44643	Promoter (<=1kb)	17	42188799	42194459	5661	2	84514	ENST00000593209.5	0	ENSG00000167925	GHDC	GH3 domain containing
chr12	51846971	51848170	1200	1.70871	1.4502	0.798369	0.371584	Promoter (<=1kb)	12	51848223	51852729	4507	1	105369971	ENST00000562996.1	-53	ENSG00000259887	FIGNL2-DT	FIGNL2 divergent transcript
chr7	33050334	33051102	769	1.70871	1.10651	0.903497	0.341849	Intron (ENST00000610140.7/51251, intron 1 of 8)	7	33029231	33040910	11680	2	51251	ENST00000497542.1	-9424	ENSG00000122643	NT5C3A	5'-nucleotidase, cytosolic IIIA
chr5	14142703	14143550	848	1.70861	3.72263	0.517617	0.471862	Promoter (<=1kb)	5	14143342	14510204	366863	1	7204	ENST00000344204.9	0	ENSG00000038382	TRIO	trio Rho guanine nucleotide exchange factor
chr19	343939	345231	1293	1.70861	3.55322	0.528374	0.467293	Promoter (<=1kb)	19	305573	344796	39224	2	54531	ENST00000264819.7	0	ENSG00000105556	MIER2	MIER family member 2
chr1	212291217	212291828	612	1.70848	1.27641	0.854308	0.355339	Intron (ENST00000261461.7/5525, intron 1 of 12)	1	212285410	212361853	76444	1	5525	ENST00000261461.7	5807	ENSG00000066027	PPP2R5A	protein phosphatase 2 regulatory subunit B'alpha
chr10	3775706	3777452	1747	1.70838	3.95351	0.506022	0.476868	Promoter (2-3kb)	10	3775996	3780217	4222	2	1316	ENST00000461124.1	2765	ENSG00000067082	KLF6	Kruppel like factor 6
chr20	37289046	37290330	1285	1.70823	3.84533	0.511099	0.474665	Promoter (<=1kb)	20	37289649	37316639	26991	1	63905	ENST00000397150.5	0	ENSG00000101363	MANBAL	mannosidase beta like
chr11	93541883	93543770	1888	1.70809	2.85833	0.584317	0.444627	Promoter (<=1kb)	11	93478472	93543391	64920	2	56935	ENST00000298966.7	0	ENSG00000166002	SMCO4	single-pass membrane protein with coiled-coil domains 4
chr16	2602881	2604248	1368	1.70757	2.63876	0.608088	0.435511	Promoter (<=1kb)	16	2603350	2630494	27145	1	652276	ENST00000399702.5	0	ENSG00000215154	LOC652276	potassium channel tetramerization domain containing 5 pseudogene
chr19	19732503	19733695	1193	1.70742	4.58882	0.475418	0.490507	Promoter (<=1kb)	19	19710472	19733112	22641	2	7561	ENST00000344099.4	0	ENSG00000105708	ZNF14	zinc finger protein 14
chr20	58236707	58237613	907	1.70712	2.99676	0.569733	0.450367	Promoter (<=1kb)	20	58232804	58235887	3084	2	55370	ENST00000467784.1	-820	NA	PPP4R1L	protein phosphatase 4 regulatory subunit 1 like (pseudogene)
chr4	78056771	78059751	2981	1.7068	2.55859	0.616209	0.432462	Promoter (<=1kb)	4	78057604	78072107	14504	1	107986293	ENST00000508909.5	0	NA	LOC107986293	uncharacterized LOC107986293
chr20	8662759	8663979	1221	1.70653	1.15443	0.867457	0.351663	Intron (ENST00000637919.1/23236, intron 9 of 32)	20	8658621	8968360	309740	1	23236	ENST00000487210.5	4138	ENSG00000182621	PLCB1	phospholipase C beta 1
chr12	95547967	95549385	1419	1.70642	4.1508	0.494453	0.48195	Promoter (<=1kb)	12	95517276	95548844	31569	2	84101	ENST00000393091.6	0	ENSG00000136014	USP44	ubiquitin specific peptidase 44
chr12	56572827	56573803	977	1.706	1.50493	0.790719	0.373886	Promoter (1-2kb)	12	56571698	56581655	9958	1	5939	ENST00000552228.1	1129	ENSG00000076067	RBMS2	RNA binding motif single stranded interacting protein 2
chr8	18957149	18958032	884	1.70591	3.26246	0.54561	0.460119	Intron (ENST00000440756.4/23362, intron 1 of 15)	8	18924533	18940452	15920	2	23362	ENST00000520789.1	-16697	ENSG00000156011	PSD3	pleckstrin and Sec7 domain containing 3
chr17	81636209	81637412	1204	1.70548	2.58441	0.613715	0.433395	Promoter (<=1kb)	17	81556887	81637112	80226	2	55666	ENST00000331134.11	0	ENSG00000182446	NPLOC4	NPL4 homolog, ubiquitin recognition factor
chr10	6150975	6151904	930	1.70544	2.16775	0.667726	0.413848	Promoter (<=1kb)	10	6152196	6152277	82	1	100422989	ENST00000577482.1	-292	ENSG00000263628	MIR3155A	microRNA 3155a
chr10	97632998	97634195	1198	1.70475	4.48479	0.478605	0.489057	Promoter (<=1kb)	10	97614553	97633500	18948	2	118812	ENST00000478953.1	0	ENSG00000171160	MORN4	MORN repeat containing 4
chr20	38434182	38435733	1552	1.70461	4.1747	0.493028	0.482582	Promoter (<=1kb)	20	38419638	38435375	15738	2	388796	ENST00000654008.1	0	ENSG00000196756	SNHG17	small nucleolar RNA host gene 17
chr19	53192928	53193620	693	1.70449	3.01458	0.566064	0.451829	Promoter (<=1kb)	19	53162424	53193358	30935	2	79788	ENST00000396424.5	0	ENSG00000197497	ZNF665	zinc finger protein 665
chr19	34772574	34773520	947	1.70433	4.38596	0.482977	0.487079	Promoter (<=1kb)	19	34758073	34773215	15143	2	148103	ENST00000329285.13	0	ENSG00000153896	ZNF599	zinc finger protein 599
chr4	9603859	9605022	1164	1.70409	2.4782	0.626102	0.428791	Intron (ENST00000653847.1/ENST00000653847.1, intron 4 of 4)	4	9556168	9556316	149	2	100302277	ENST00000408348.1	-47543	ENSG00000221275	MIR548I2	microRNA 548i-2
chr21	45152029	45153450	1422	1.70384	1.5715	0.767279	0.381063	Intron (ENST00000348831.9/104, intron 2 of 10)	21	45134796	45226559	91764	1	104	ENST00000629643.2	17233	ENSG00000197381	ADARB1	adenosine deaminase RNA specific B1
chr5	139574976	139575998	1023	1.70384	1.27383	0.844894	0.358004	Intron (ENST00000511725.5/7322, intron 1 of 6)	5	139562029	139627115	65087	1	7322	ENST00000505548.5	12947	ENSG00000131508	UBE2D2	ubiquitin conjugating enzyme E2 D2
chr14	102062853	102063756	904	1.70372	1.62978	0.760733	0.383102	Promoter (2-3kb)	14	102036669	102066228	29560	2	107984661	ENST00000553701.1	2472	NA	LOC107984661	uncharacterized LOC107984661
chr9	136327090	136328293	1204	1.70372	1.60815	0.765342	0.381665	Promoter (<=1kb)	9	136327476	136341836	14361	1	26086	ENST00000616132.4	0	ENSG00000160360	GPSM1	G protein signaling modulator 1
chr3	128497371	128498219	849	1.70361	2.19114	0.664969	0.414813	Intron (ENST00000468377.1/101927167, intron 1 of 1)	3	128479427	128493201	13775	2	2624	ENST00000341105.7	-4170	ENSG00000179348	GATA2	GATA binding protein 2
chr20	63272134	63273326	1193	1.70319	3.79238	0.51049	0.474929	Promoter (<=1kb)	20	63241390	63272694	31305	2	128414	ENST00000370307.6	0	ENSG00000101198	NKAIN4	sodium/potassium transporting ATPase interacting 4
chr12	57242891	57243902	1012	1.70316	3.41865	0.533554	0.465119	Promoter (2-3kb)	12	57239546	57240715	1170	2	56901	ENST00000557276.1	-2176	ENSG00000185633	NDUFA4L2	NDUFA4 mitochondrial complex associated like 2
chr9	96856762	96857245	484	1.70281	2.11651	0.674378	0.411532	Promoter (2-3kb)	9	96816269	96854514	38246	2	158431	ENST00000481138.6	-2248	ENSG00000196597	ZNF782	zinc finger protein 782
chr1	204398303	204399310	1008	1.70265	1.76974	0.731761	0.392316	Intron (ENST00000443515.1/ENST00000443515.1, intron 1 of 2)	1	204403381	204411817	8437	2	84919	ENST00000367188.5	12507	ENSG00000158615	PPP1R15B	protein phosphatase 1 regulatory subunit 15B
chr12	57213211	57214683	1473	1.70248	3.51677	0.526676	0.46801	Promoter (2-3kb)	12	57216794	57226449	9656	1	11247	ENST00000349394.6	-2111	ENSG00000182379	NXPH4	neurexophilin 4
chr19	38841705	38843095	1391	1.70234	4.29036	0.48594	0.485746	Promoter (<=1kb)	19	38836398	38841749	5352	2	3191	ENST00000595164.5	0	ENSG00000104824	HNRNPL	heterogeneous nuclear ribonucleoprotein L
chr9	36572356	36573916	1561	1.70224	3.37185	0.536454	0.463908	Promoter (<=1kb)	9	36572862	36677683	104822	1	9833	ENST00000536329.5	0	ENSG00000165304	MELK	maternal embryonic leucine zipper kinase
chr19	11558692	11560839	2148	1.7022	4.62205	0.471167	0.492453	Promoter (<=1kb)	19	11559374	11604278	44905	1	199692	ENST00000593279.5	0	ENSG00000198551	ZNF627	zinc finger protein 627
chr19	15330998	15332995	1998	1.70173	4.02871	0.498606	0.480115	Promoter (<=1kb)	19	15235519	15332539	97021	2	23476	ENST00000679869.1	0	ENSG00000141867	BRD4	bromodomain containing 4
chr21	14215712	14216883	1172	1.70167	3.95474	0.5009	0.479107	Promoter (<=1kb)	21	14216130	14228372	12243	1	54033	ENST00000468643.5	0	ENSG00000185272	RBM11	RNA binding motif protein 11
chr12	53197923	53199210	1288	1.70162	1.89512	0.707784	0.400183	Promoter (<=1kb)	12	53196101	53197709	1609	2	3695	ENST00000549196.1	-214	ENSG00000139626	ITGB7	integrin subunit beta 7
chr2	27965656	27966683	1028	1.70162	1.53859	0.780262	0.377064	Intron (ENST00000448427.1/9577, intron 5 of 5)	2	27996367	27996449	83	1	100422965	ENST00000584745.1	-29684	ENSG00000265321	MIR4263	microRNA 4263
chr19	36772371	36773480	1110	1.70162	4.84403	0.461038	0.497141	Promoter (<=1kb)	19	36714383	36772825	58443	2	342892	ENST00000589390.5	0	ENSG00000267041	ZNF850	zinc finger protein 850
chr14	58637006	58638697	1692	1.70155	2.8342	0.580337	0.446183	Promoter (<=1kb)	14	58637962	58648321	10360	1	51339	ENST00000395153.8	0	ENSG00000165617	DACT1	dishevelled binding antagonist of beta catenin 1
chr2	219552060	219553084	1025	1.70147	4.04102	0.497409	0.480643	Promoter (<=1kb)	2	219550729	219552389	1661	2	23363	ENST00000462534.5	0	ENSG00000124006	OBSL1	obscurin like cytoskeletal adaptor 1
chr6	52399738	52400806	1069	1.70118	2.33265	0.640776	0.423432	Intron (ENST00000512121.1/85315, intron 1 of 1)	6	52413014	52438481	25468	1	114327	ENST00000637315.1	-12208	ENSG00000096093	EFHC1	EF-hand domain containing 1
chr17	42378994	42379689	696	1.70102	1.15519	0.882648	0.34748	Intron (ENST00000264657.10/6774, intron 1 of 23)	17	42313412	42388373	74962	2	6774	ENST00000678960.1	8684	ENSG00000168610	STAT3	signal transducer and activator of transcription 3
chr16	689867	690816	950	1.70035	3.19246	0.547681	0.459269	Promoter (<=1kb)	16	684622	690398	5777	2	84219	ENST00000293883.9	0	ENSG00000127580	WDR24	WD repeat domain 24
chr1	1032690	1033884	1195	1.70008	3.14975	0.550489	0.45812	Promoter (<=1kb)	1	1034106	1056116	22011	1	375790	ENST00000651234.1	-222	ENSG00000188157	AGRN	agrin
chr15	75647058	75648348	1291	1.70003	3.09701	0.555804	0.455958	Promoter (<=1kb)	15	75647912	75662301	14390	1	257364	ENST00000308527.6	0	ENSG00000173548	SNX33	sorting nexin 33
chr19	12194785	12195481	697	1.69978	1.83086	0.702635	0.401902	Promoter (<=1kb)	19	12195015	12209806	14792	1	100289333	ENST00000415793.6	0	NA	LOC100289333	uncharacterized LOC100289333
chr4	142386283	142387388	1106	1.69971	1.12148	0.894108	0.344369	Intron (ENST00000513000.5/8821, intron 8 of 26)	4	142237864	142403009	165146	2	8821	ENST00000506297.5	15621	ENSG00000109452	INPP4B	inositol polyphosphate-4-phosphatase type II B
chr14	104977842	104978889	1048	1.69967	2.07715	0.676068	0.410946	Promoter (<=1kb)	14	104937253	104978374	41122	2	113146	ENST00000333244.6	0	ENSG00000185567	AHNAK2	AHNAK nucleoprotein 2
chr19	12639879	12640652	774	1.69967	1.98234	0.691583	0.405629	Promoter (<=1kb)	19	12583485	12640098	56614	2	105372279	ENST00000465656.1	0	NA	LOC105372279	uncharacterized LOC105372279
chr17	81959277	81960642	1366	1.6989	3.27022	0.540928	0.46205	Promoter (<=1kb)	17	81955515	81959810	4296	2	147111	ENST00000477214.5	0	ENSG00000185269	NOTUM	notum, palmitoleoyl-protein carboxylesterase
chr6	106973709	106975577	1869	1.69847	1.6098	0.756538	0.384417	Promoter (<=1kb)	6	106969831	106974729	4899	2	100133941	ENST00000606017.2	0	ENSG00000272398	CD24	CD24 molecule
chr6	43644766	43645830	1065	1.69844	2.67012	0.596608	0.439878	Promoter (<=1kb)	6	43645036	43672600	27565	1	221421	ENST00000372163.5	0	ENSG00000172426	RSPH9	radial spoke head component 9
chr19	2455954	2457571	1618	1.69835	3.56507	0.521727	0.470108	Promoter (<=1kb)	19	2428166	2456959	28794	2	84823	ENST00000325327.4	0	ENSG00000176619	LMNB2	lamin B2
chr17	44307952	44309190	1239	1.69815	3.65354	0.515653	0.472704	Promoter (<=1kb)	17	44302517	44308393	5877	2	101926996	ENST00000586388.1	0	NA	RUNDC3A-AS1	RUNDC3A antisense RNA 1
chr9	131530697	131531727	1031	1.69807	3.8994	0.502655	0.478338	Promoter (<=1kb)	9	131523801	131531179	7379	2	83549	ENST00000372210.7	0	ENSG00000130717	UCK1	uridine-cytidine kinase 1
chr9	124415065	124415959	895	1.69807	3.88102	0.503576	0.477935	Promoter (<=1kb)	9	124353465	124415442	61978	2	5695	ENST00000259457.8	0	ENSG00000136930	PSMB7	proteasome 20S subunit beta 7
chr7	45939877	45941199	1323	1.69762	2.18807	0.663178	0.415443	Promoter (<=1kb)	7	45940449	45986472	46024	1	102723446	ENST00000664963.1	0	NA	LOC102723446	uncharacterized LOC102723446
chr16	66924822	66925723	902	1.69728	1.5552	0.768314	0.380742	Promoter (<=1kb)	16	66921679	66925536	3858	2	6236	ENST00000420652.5	0	ENSG00000166592	RRAD	RRAD, Ras related glycolysis inhibitor and calcium channel regulator
chr19	3028204	3029218	1015	1.69728	1.36877	0.814808	0.366705	Promoter (<=1kb)	19	2997639	3029131	31493	2	7089	ENST00000455444.6	0	ENSG00000065717	TLE2	TLE family member 2, transcriptional corepressor
chr17	16568743	16569710	968	1.69711	3.42714	0.52948	0.466828	Promoter (<=1kb)	17	16546954	16569204	22251	2	57336	ENST00000395825.4	0	ENSG00000141040	ZNF287	zinc finger protein 287
chr14	102927856	102929229	1374	1.69703	3.51008	0.52291	0.469605	Promoter (<=1kb)	14	102928645	102933596	4952	1	81693	ENST00000558590.1	0	ENSG00000166126	AMN	amnion associated transmembrane protein
chr16	29826580	29827678	1099	1.69685	2.69843	0.591206	0.441956	Promoter (1-2kb)	16	29829612	29831074	1463	1	9961	ENST00000566252.1	-1934	ENSG00000013364	MVP	major vault protein
chr17	45219032	45219496	465	1.69685	1.945	0.699348	0.403006	Promoter (<=1kb)	17	45219735	45220332	598	2	339192	ENST00000590522.1	836	ENSG00000267121	FMNL1-DT	FMNL1 divergent transcript
chr12	111396739	111397665	927	1.69675	2.46216	0.622128	0.43026	Promoter (<=1kb)	12	111396835	111403307	6473	1	105369984	ENST00000548846.1	0	ENSG00000257595	LINC02356	long intergenic non-protein coding RNA 2356
chr15	28885421	28886816	1396	1.69658	3.21881	0.54299	0.461199	Promoter (<=1kb)	15	28885974	29118315	232342	1	321	ENST00000558402.5	0	ENSG00000034053	APBA2	amyloid beta precursor protein binding family A member 2
chr11	57457449	57460912	3464	1.69624	4.11689	0.491001	0.483483	Promoter (<=1kb)	11	57460528	57477534	17007	1	349667	ENST00000335099.8	0	ENSG00000186907	RTN4RL2	reticulon 4 receptor like 2
chr1	26997604	26998268	665	1.6962	2.23863	0.651848	0.419455	Intron (ENST00000522111.3/388610, intron 1 of 1)	1	26994319	27000109	5791	1	388610	ENST00000531285.1	3285	ENSG00000253368	TRNP1	TMF1 regulated nuclear protein 1
chr22	37623199	37624127	929	1.69618	2.02186	0.683275	0.408464	Promoter (<=1kb)	22	37623829	37627162	3334	1	26088	ENST00000475445.1	0	ENSG00000100083	GGA1	golgi associated, gamma adaptin ear containing, ARF binding protein 1
chr19	12847182	12848190	1009	1.69618	1.8282	0.71728	0.39704	Promoter (<=1kb)	19	12847235	12847801	567	1	22983	ENST00000592713.1	0	ENSG00000105613	MAST1	microtubule associated serine/threonine kinase 1
chr15	89057320	89058114	795	1.6961	1.04245	0.906527	0.341041	Intron (ENST00000565938.1/102724566, intron 1 of 3)	15	89041274	89077215	35942	1	102724566	ENST00000668304.1	16046	NA	CARMAL	coronary artery disease region linked MFGE8 regulatory lncRNA
chr4	163558400	163559397	998	1.69556	2.08661	0.675078	0.411289	Intron (ENST00000274056.11/55016, intron 4 of 5)	4	163517072	163519558	2487	1	55319	ENST00000503148.1	41328	ENSG00000198498	TMA16	translation machinery associated 16 homolog
chr16	2022823	2023899	1077	1.69546	3.65384	0.514223	0.473318	Promoter (1-2kb)	16	2025356	2036389	11034	1	9351	ENST00000567504.5	-1457	ENSG00000065054	SLC9A3R2	SLC9A3 regulator 2
chr13	110560845	110562500	1656	1.69519	3.22668	0.541687	0.461737	Promoter (<=1kb)	13	110523066	110561722	38657	2	55647	ENST00000267328.5	0	ENSG00000139832	RAB20	RAB20, member RAS oncogene family
chr10	75294623	75295979	1357	1.69516	2.61419	0.601715	0.437927	Promoter (<=1kb)	10	75296320	75361680	65361	1	253264	ENST00000669449.1	-341	ENSG00000226051	ZNF503-AS1	ZNF503 antisense RNA 1
chr9	128504348	128505428	1081	1.69513	5.05529	0.449384	0.50263	Promoter (<=1kb)	9	128504655	128542268	37614	1	2733	ENST00000683748.1	0	ENSG00000119392	GLE1	GLE1 RNA export mediator
chr9	107487821	107489047	1227	1.69508	1.59997	0.757212	0.384205	Promoter (<=1kb)	9	107484852	107488447	3596	2	9314	ENST00000497048.5	0	ENSG00000136826	KLF4	Kruppel like factor 4
chr20	63056207	63057538	1332	1.69508	1.38349	0.809898	0.368153	Intron (ENST00000606208.5/63930, intron 1 of 1)	20	63038011	63053863	15853	1	100144597	ENST00000455711.1	18196	ENSG00000237119	LINC01056	long intergenic non-protein coding RNA 1056
chr10	103692047	103693903	1857	1.695	3.15631	0.548025	0.459128	Promoter (<=1kb)	10	103599520	103693623	94104	2	9644	ENST00000315994.6	0	ENSG00000107957	SH3PXD2A	SH3 and PX domains 2A
chr19	53394669	53396024	1356	1.69473	4.58405	0.468957	0.493469	Promoter (<=1kb)	19	53395144	53427321	32178	1	91661	ENST00000504235.5	0	ENSG00000196417	ZNF765	zinc finger protein 765
chr20	51767195	51768239	1045	1.69445	1.27971	0.826168	0.363386	Promoter (<=1kb)	20	51596514	51768328	171815	2	10079	ENST00000311637.9	89	ENSG00000054793	ATP9A	ATPase phospholipid transporting 9A (putative)
chr1	244854591	244855660	1070	1.69445	1.2573	0.832906	0.361436	Promoter (<=1kb)	1	244846625	244855597	8973	2	3192	ENST00000640264.1	0	ENSG00000153187	HNRNPU	heterogeneous nuclear ribonucleoprotein U
chr11	18731727	18732558	832	1.69445	1.02494	0.912461	0.339465	Promoter (<=1kb)	11	18727930	18730744	2815	2	84867	ENST00000396166.7	-983	ENSG00000110786	PTPN5	protein tyrosine phosphatase non-receptor type 5
chr10	71708118	71708803	686	1.69405	1.27575	0.840211	0.359339	Intron (ENST00000224721.12/64072, intron 26 of 69)	10	71712604	71742036	29433	1	64072	ENST00000398792.3	-3801	ENSG00000107736	CDH23	cadherin related 23
chr1	2049698	2050999	1302	1.69342	4.93508	0.453151	0.500844	Promoter (<=1kb)	1	2049304	2050070	767	2	105378591	ENST00000449154.1	0	ENSG00000226969	PRKCZ-DT	PRKCZ divergent transcript
chr2	25850807	25853466	2660	1.69324	2.87947	0.572814	0.449145	Intron (ENST00000435504.9/55252, intron 1 of 12)	2	25768762	25830891	62130	2	55252	ENST00000497092.1	-19916	ENSG00000143970	ASXL2	ASXL transcriptional regulator 2
chr16	81745902	81746785	884	1.69314	1.80822	0.719467	0.396322	Intron (ENST00000565272.5/ENST00000565272.5, intron 2 of 3)	16	81739097	81859163	120067	1	5336	ENST00000565054.5	6805	ENSG00000197943	PLCG2	phospholipase C gamma 2
chr3	115819300	115820582	1283	1.69314	1.77233	0.726341	0.394075	Intron (ENST00000539563.5/4045, intron 5 of 5)	3	115810276	115842497	32222	2	4045	ENST00000475403.2	21915	ENSG00000185565	LSAMP	limbic system associated membrane protein
chr10	116848151	116850012	1862	1.69306	1.51884	0.7751	0.378647	Promoter (<=1kb)	10	116671192	116849741	178550	2	259217	ENST00000635765.1	0	ENSG00000165868	HSPA12A	heat shock protein family A (Hsp70) member 12A
chr20	59207271	59208315	1045	1.69306	1.36619	0.81375	0.367017	Intron (ENST00000637017.1/128611, intron 6 of 7)	20	59163821	59259113	95293	1	128611	ENST00000371030.4	43450	ENSG00000124203	ZNF831	zinc finger protein 831
chr7	99312657	99313765	1109	1.69306	1.29276	0.834601	0.360948	Intron (ENST00000640784.1/105375421, intron 2 of 3)	7	99260570	99325586	65017	2	105375421	ENST00000638785.1	11821	ENSG00000284523	LOC105375421	uncharacterized LOC105375421
chr12	10601949	10603288	1340	1.69306	1.02716	0.926585	0.335755	Promoter (2-3kb)	12	10588783	10599669	10887	2	10748	ENST00000510134.6	-2280	NA	KLRA1P	killer cell lectin like receptor A1, pseudogene
chr2	42047130	42047922	793	1.69291	1.18091	0.856918	0.354605	Promoter (<=1kb)	2	42048021	42058517	10497	1	91461	ENST00000294964.6	-99	ENSG00000162878	PKDCC	protein kinase domain containing, cytoplasmic
chr13	51420910	51422589	1680	1.69291	1.01685	0.915197	0.338742	Promoter (<=1kb)	13	51365228	51421374	56147	2	26512	ENST00000497989.5	0	ENSG00000102786	INTS6	integrator complex subunit 6
chr5	180352850	180354076	1227	1.69282	4.15958	0.487271	0.485149	Promoter (<=1kb)	5	180300698	180353336	52639	2	9945	ENST00000253778.13	0	ENSG00000131459	GFPT2	glutamine-fructose-6-phosphate transaminase 2
chr7	150322294	150324233	1940	1.69265	3.74361	0.507421	0.47626	Promoter (<=1kb)	7	150243916	150323573	79658	2	653857	ENST00000478393.5	0	ENSG00000106526	ACTR3C	actin related protein 3C
chr17	3723224	3724454	1231	1.69245	3.79065	0.504794	0.477404	Promoter (<=1kb)	17	3714628	3723837	9210	2	3682	ENST00000572179.5	0	ENSG00000083457	ITGAE	integrin subunit alpha E
chr19	2702065	2703364	1300	1.69229	2.94944	0.563889	0.4527	Promoter (<=1kb)	19	2511219	2702694	191476	2	2788	ENST00000382159.8	0	ENSG00000176533	GNG7	G protein subunit gamma 7
chr15	90539541	90540378	838	1.69212	2.17691	0.653023	0.419036	Promoter (<=1kb)	15	90539617	90595577	55961	1	64784	ENST00000560927.1	0	ENSG00000140577	CRTC3	CREB regulated transcription coactivator 3
chr17	2481944	2482821	878	1.69212	1.62591	0.750529	0.386311	Intron (ENST00000263092.11/79066, intron 2 of 9)	17	2459893	2477885	17993	2	79066	ENST00000571298.5	-4059	ENSG00000127804	METTL16	methyltransferase 16, N6-methyladenosine
chr15	75029095	75030004	910	1.69212	1.52958	0.772167	0.37955	Promoter (<=1kb)	15	75028249	75049538	21290	1	60490	ENST00000567336.1	846	ENSG00000138621	PPCDC	phosphopantothenoylcysteine decarboxylase
chr3	45656290	45657193	904	1.69212	1.40594	0.802788	0.370264	Intron (ENST00000465039.5/8994, intron 4 of 7)	3	45665675	45674566	8892	1	8994	ENST00000474665.1	-8482	ENSG00000144791	LIMD1	LIM domain containing 1
chr19	9583477	9584922	1446	1.69192	3.51946	0.520414	0.470667	Promoter (<=1kb)	19	9560329	9584504	24176	2	7675	ENST00000320451.7	0	ENSG00000197961	ZNF121	zinc finger protein 121
chr1	234408603	234409630	1028	1.69176	3.4148	0.526884	0.467922	Promoter (<=1kb)	1	234391339	234407955	16617	2	6894	ENST00000483404.5	-648	ENSG00000059588	TARBP1	TAR (HIV-1) RNA binding protein 1
chr20	3158985	3160315	1331	1.69172	3.60773	0.515141	0.472924	Promoter (<=1kb)	20	3107573	3159865	52293	2	22888	ENST00000217173.7	0	ENSG00000185019	UBOX5	U-box domain containing 5
chr19	7488462	7489764	1303	1.69166	3.55888	0.517752	0.471804	Promoter (<=1kb)	19	7476875	7489035	12161	2	92960	ENST00000221480.6	0	ENSG00000104883	PEX11G	peroxisomal biogenesis factor 11 gamma
chr20	44745679	44746385	707	1.69147	1.10917	0.881625	0.34776	Promoter (<=1kb)	20	44695202	44745995	50794	2	106144538	ENST00000445420.5	0	NA	KCNK15-AS1	KCNK15 and WISP2 antisense RNA 1
chr19	57947103	57948279	1177	1.69141	3.21998	0.538517	0.46305	Promoter (<=1kb)	19	57940833	57947706	6874	2	10172	ENST00000282308.4	0	ENSG00000152454	ZNF256	zinc finger protein 256
chr7	130733393	130734793	1401	1.69122	1.69318	0.736382	0.390825	Promoter (<=1kb)	7	130730697	130734207	3511	2	136259	ENST00000583337.4	0	ENSG00000266265	KLF14	Kruppel like factor 14
chr19	18416723	18417465	743	1.69115	3.33523	0.532253	0.465663	Promoter (1-2kb)	19	18418864	18432214	13351	1	170463	ENST00000597724.6	-1399	ENSG00000130511	SSBP4	single stranded DNA binding protein 4
chr13	25901649	25903353	1705	1.69096	2.76682	0.58276	0.445235	Intron (ENST00000381655.7/51761, intron 33 of 36)	13	25827936	25842653	14718	1	51761	ENST00000683461.1	73713	ENSG00000132932	ATP8A2	ATPase phospholipid transporting 8A2
chr12	120264794	120266474	1681	1.69066	3.40007	0.52785	0.467514	Promoter (<=1kb)	12	120210439	120265771	55333	2	5829	ENST00000267257.11	0	ENSG00000089159	PXN	paxillin
chr12	64780464	64781919	1456	1.69046	2.39382	0.624639	0.429331	Promoter (<=1kb)	12	64780516	64881032	100517	1	23329	ENST00000542120.6	0	ENSG00000111490	TBC1D30	TBC1 domain family member 30
chr4	663234	664425	1192	1.69041	3.58626	0.515368	0.472826	Promoter (<=1kb)	4	663723	664922	1200	1	5158	ENST00000460119.1	0	ENSG00000133256	PDE6B	phosphodiesterase 6B
chr17	44898879	44900087	1209	1.69037	4.57929	0.46694	0.4944	Promoter (<=1kb)	17	44899142	44901554	2413	1	388389	ENST00000577339.5	0	ENSG00000167131	CCDC103	coiled-coil domain containing 103
chr19	15263863	15264825	963	1.69013	1.12701	0.875003	0.349577	Promoter (<=1kb)	19	15256135	15264400	8266	2	23476	ENST00000602230.1	0	ENSG00000141867	BRD4	bromodomain containing 4
chr17	416320	417374	1055	1.6901	3.1969	0.541416	0.461848	Promoter (2-3kb)	17	404535	414023	9489	2	105371430	ENST00000466740.2	-2297	ENSG00000241525	LOC105371430	uncharacterized LOC105371430
chr20	2663695	2664930	1236	1.68994	3.92135	0.496955	0.480843	Promoter (<=1kb)	20	2658395	2664188	5794	2	3420	ENST00000488299.5	0	ENSG00000101365	IDH3B	isocitrate dehydrogenase (NAD(+)) 3 non-catalytic subunit beta
chr22	40462269	40464183	1915	1.68976	3.73793	0.506249	0.476769	Promoter (<=1kb)	22	40410289	40463440	53152	2	57591	ENST00000407029.7	0	ENSG00000196588	MRTFA	myocardin related transcription factor A
chr1	156891878	156893403	1526	1.68955	2.66383	0.591506	0.44184	Promoter (<=1kb)	1	156893698	156906720	13023	1	375033	ENST00000444016.5	-295	ENSG00000187800	PEAR1	platelet endothelial aggregation receptor 1
chr1	3610924	3612126	1203	1.68952	2.15426	0.655459	0.41817	Promoter (<=1kb)	1	3487951	3611508	123558	2	1953	ENST00000356575.9	0	ENSG00000162591	MEGF6	multiple EGF like domains 6
chr8	38410124	38411725	1602	1.68952	1.57687	0.760104	0.383299	Promoter (2-3kb)	8	38412085	38413976	1892	2	2260	ENST00000526688.1	2251	ENSG00000077782	FGFR1	fibroblast growth factor receptor 1
chr12	9729954	9732028	2075	1.68952	1.15401	0.878267	0.34868	Promoter (1-2kb)	12	9716561	9733119	16559	2	160365	ENST00000542530.5	1091	ENSG00000184293	CLECL1	C-type lectin like 1
chr19	46346332	46347738	1407	1.68932	4.61134	0.465015	0.495292	Promoter (<=1kb)	19	46347087	46390975	43889	1	5536	ENST00000012443.9	0	ENSG00000011485	PPP5C	protein phosphatase 5 catalytic subunit
chr17	66399068	66400737	1670	1.68924	2.28384	0.639477	0.423903	Intron (ENST00000413366.8/5578, intron 2 of 16)	17	66403638	66414973	11336	2	101928001	ENST00000584614.1	14236	NA	PRKCA-AS1	PRKCA antisense RNA 1
chr17	43778197	43779706	1510	1.68917	4.2956	0.478627	0.489047	Promoter (<=1kb)	17	43766125	43778977	12853	2	1845	ENST00000226004.8	0	ENSG00000108861	DUSP3	dual specificity phosphatase 3
chr1	29123196	29124941	1746	1.689	3.56035	0.516279	0.472435	Promoter (<=1kb)	1	29119429	29123903	4475	2	399474	ENST00000521452.2	0	ENSG00000253304	TMEM200B	transmembrane protein 200B
chr11	72091010	72091831	822	1.68886	1.39434	0.793798	0.372957	Promoter (2-3kb)	11	72088664	72095599	6936	1	120356739	ENST00000644745.1	2346	ENSG00000184154	LRRC51	leucine rich repeat containing 51
chr15	74127270	74128382	1113	1.68886	1.18493	0.855088	0.35512	Promoter (<=1kb)	15	74128126	74133022	4897	1	57611	ENST00000569886.5	0	ENSG00000167178	ISLR2	immunoglobulin superfamily containing leucine rich repeat 2
chr2	88599704	88601003	1300	1.68873	1.92419	0.692191	0.405423	Intron (ENST00000652736.1/9451, intron 2 of 16)	2	88557854	88595857	38004	2	9451	ENST00000415570.1	-3847	ENSG00000172071	EIF2AK3	eukaryotic translation initiation factor 2 alpha kinase 3
chr17	49315264	49316427	1164	1.68873	1.66838	0.740367	0.389546	Intron (ENST00000655089.1/124871, intron 4 of 5)	17	49288346	49288454	109	2	102465137	ENST00000616087.1	-26810	ENSG00000273500	MIR6129	microRNA 6129
chr12	110123860	110124965	1106	1.68865	4.28775	0.479013	0.488872	Promoter (<=1kb)	12	110124335	110169182	44848	1	28981	ENST00000361948.8	0	ENSG00000122970	IFT81	intraflagellar transport 81
chr11	128685664	128687445	1782	1.68862	2.72806	0.583846	0.444811	Promoter (<=1kb)	11	128629653	128686428	56776	2	101929538	ENST00000572256.1	0	ENSG00000245008	LOC101929538	uncharacterized LOC101929538
chr7	50368611	50369883	1273	1.6886	2.76839	0.580552	0.446098	Promoter (<=1kb)	7	50367665	50369704	2040	1	10320	ENST00000492119.1	946	ENSG00000185811	IKZF1	IKAROS family zinc finger 1
chr14	60721225	60723825	2601	1.6886	2.70771	0.587159	0.443522	Promoter (<=1kb)	14	60713167	60723165	9999	2	51804	ENST00000554079.1	0	ENSG00000100625	SIX4	SIX homeobox 4
chr6	28124123	28125623	1501	1.6882	3.87703	0.498253	0.480271	Promoter (<=1kb)	6	28124609	28130082	5474	1	80345	ENST00000340487.5	0	ENSG00000196812	ZSCAN16	zinc finger and SCAN domain containing 16
chr8	140635472	140637787	2316	1.68815	4.73867	0.458786	0.498194	Promoter (<=1kb)	8	140636281	140638283	2003	1	104355217	ENST00000623655.2	0	NA	ERICD	E2F1-regulated inhibitor of cell death
chr17	80426540	80427621	1082	1.68809	2.28566	0.638661	0.424199	Promoter (1-2kb)	17	80425504	80430343	4840	1	284131	ENST00000519331.1	1036	ENSG00000173818	ENDOV	endonuclease V
chr14	74922586	74923726	1141	1.68796	2.14907	0.655646	0.418104	Promoter (<=1kb)	14	74903951	74923260	19310	2	83694	ENST00000557413.6	0	ENSG00000198208	RPS6KL1	ribosomal protein S6 kinase like 1
chr17	63522730	63523600	871	1.68796	1.78397	0.717326	0.397025	Promoter (<=1kb)	17	63523334	63546032	22699	1	81033	ENST00000456941.6	0	ENSG00000173826	KCNH6	potassium voltage-gated channel subfamily H member 6
chr8	22864419	22865623	1205	1.68768	1.56448	0.752785	0.385598	Intron (ENST00000256404.8/157310, intron 3 of 6)	8	22877972	22884139	6168	1	101929237	ENST00000520914.5	-12349	ENSG00000248738	LOC101929237	uncharacterized LOC101929237
chr22	40524914	40526050	1137	1.68768	1.26679	0.829115	0.362531	Intron (ENST00000417123.1/101927257, intron 3 of 3)	22	40521800	40526707	4908	1	101927257	ENST00000417123.1	3114	ENSG00000232564	MRTFA-AS1	MRTFA antisense RNA 1
chr10	29646910	29648932	2023	1.68768	1.17715	0.857555	0.354427	Promoter (<=1kb)	10	29555090	29647255	92166	2	6840	ENST00000483758.1	0	ENSG00000197321	SVIL	supervillin
chr22	36252619	36253906	1288	1.6875	2.6648	0.591444	0.441864	Promoter (<=1kb)	22	36253071	36267530	14460	1	8542	ENST00000422706.5	0	ENSG00000100342	APOL1	apolipoprotein L1
chr16	66549338	66550066	729	1.68748	3.4196	0.523991	0.469146	Promoter (<=1kb)	16	66510744	66549856	39113	2	7084	ENST00000527800.6	0	ENSG00000166548	TK2	thymidine kinase 2
chr16	57667245	57668309	1065	1.68722	1.74605	0.724294	0.394742	Promoter (<=1kb)	16	57668277	57678282	10006	1	222487	ENST00000568245.5	0	ENSG00000182885	ADGRG3	adhesion G protein-coupled receptor G3
chr4	82360353	82361324	972	1.68722	1.72894	0.727621	0.393658	Promoter (<=1kb)	4	82353834	82359639	5806	2	3184	ENST00000514671.5	-714	ENSG00000138668	HNRNPD	heterogeneous nuclear ribonucleoprotein D
chr14	22982023	22983533	1511	1.68706	3.72799	0.504903	0.477356	Promoter (<=1kb)	14	22982698	22994151	11454	1	107984660	ENST00000557615.5	0	ENSG00000258457	AJUBA-DT	AJUBA divergent transcript
chr16	31700235	31701635	1401	1.68706	3.50268	0.518965	0.471286	Promoter (<=1kb)	16	31700590	31707437	6848	1	100132341	ENST00000254109.9	0	ENSG00000131797	CLUHP3	clustered mitochondria homolog pseudogene 3
chr19	57362988	57364013	1026	1.68675	4.79152	0.455523	0.499726	Promoter (<=1kb)	19	57363551	57365405	1855	1	10597	ENST00000543226.2	0	ENSG00000256060	TRAPPC2B	trafficking protein particle complex subunit 2B
chr16	81816707	81818677	1971	1.68671	2.99369	0.557937	0.455095	Intron (ENST00000565054.5/5336, intron 3 of 5)	16	81798466	81869233	70768	1	5336	ENST00000565400.5	18241	ENSG00000197943	PLCG2	phospholipase C gamma 2
chr19	4352378	4353167	790	1.68656	1.37922	0.797348	0.37189	Promoter (<=1kb)	19	4352990	4354577	1588	1	84954	ENST00000601877.1	0	ENSG00000008382	MPND	MPN domain containing
chr19	34733449	34734721	1273	1.68629	5.01338	0.446661	0.503927	Promoter (<=1kb)	19	34734155	34739620	5466	1	339318	ENST00000599244.5	0	ENSG00000197841	ZNF181	zinc finger protein 181
chr19	7522099	7523354	1256	1.68625	3.66914	0.508075	0.475976	Promoter (<=1kb)	19	7522624	7534009	11386	1	57192	ENST00000264079.11	0	ENSG00000090674	MCOLN1	mucolipin TRP cation channel 1
chr4	89894434	89895471	1038	1.6855	1.49612	0.768171	0.380786	Promoter (<=1kb)	4	89894854	89954614	59761	1	22915	ENST00000264790.7	0	ENSG00000138722	MMRN1	multimerin 1
chr19	14057443	14059348	1906	1.6855	1.25358	0.832839	0.361456	Promoter (<=1kb)	19	14053367	14057599	4233	2	342979	ENST00000589048.2	0	ENSG00000187867	PALM3	paralemmin 3
chr17	2828200	2829080	881	1.6855	1.01956	0.913625	0.339157	Intron (ENST00000637138.1/23108, intron 3 of 25)	17	2796482	3034771	238290	1	23108	ENST00000542807.1	31718	ENSG00000132359	RAP1GAP2	RAP1 GTPase activating protein 2
chr6	90266673	90267774	1102	1.68516	2.40703	0.61743	0.432006	Intron (ENST00000257749.9/60468, intron 2 of 8)	6	90295507	90363665	68159	1	105377891	ENST00000667364.1	-27733	NA	LOC105377891	uncharacterized LOC105377891
chr16	4768211	4769286	1076	1.68508	3.16972	0.540348	0.462291	Promoter (<=1kb)	16	4750814	4767216	16403	2	26048	ENST00000545009.1	-995	ENSG00000103199	ZNF500	zinc finger protein 500
chr16	66947103	66948567	1465	1.68456	3.50193	0.517139	0.472067	Intron (ENST00000566869.1/8824, intron 2 of 3)	16	66942712	66963256	20545	1	8824	ENST00000566869.1	4391	ENSG00000172831	CES2	carboxylesterase 2
chr13	113930700	113931717	1018	1.68455	2.31002	0.635213	0.425452	Promoter (1-2kb)	13	113923052	113928991	5940	2	100861555	ENST00000562710.2	-1709	NA	LINC00565	long intergenic non-protein coding RNA 565
chr5	131355664	131356716	1053	1.6845	1.43449	0.782969	0.376237	Intron (ENST00000502840.5/56990, intron 3 of 3)	5	131385606	131398446	12841	1	56990	ENST00000502582.1	-28890	ENSG00000158985	CDC42SE2	CDC42 small effector 2
chr19	49148946	49150628	1683	1.68425	2.96221	0.558554	0.454846	Promoter (<=1kb)	19	49149958	49151021	1064	1	8541	ENST00000602783.1	0	ENSG00000177380	PPFIA3	PTPRF interacting protein alpha 3
chr21	45554591	45556280	1690	1.68424	3.78559	0.500485	0.479289	Intron (ENST00000650808.1/6573, intron 1 of 5)	21	45514715	45563115	48401	2	6573	ENST00000650808.1	6835	ENSG00000173638	SLC19A1	solute carrier family 19 member 1
chr6	43223920	43225162	1243	1.68421	3.84815	0.497148	0.480758	Promoter (<=1kb)	6	43223240	43224584	1345	1	23113	ENST00000504647.1	680	ENSG00000112659	CUL9	cullin 9
chr16	31873559	31875166	1608	1.68416	4.10115	0.485268	0.486048	Promoter (<=1kb)	16	31873807	31914725	40919	1	10308	ENST00000394846.7	0	ENSG00000185947	ZNF267	zinc finger protein 267
chr16	3065007	3066490	1484	1.68411	2.92856	0.562884	0.453103	Promoter (<=1kb)	16	3065297	3069667	4371	1	9235	ENST00000325568.9	0	ENSG00000008517	IL32	interleukin 32
chr4	143558833	143560081	1249	1.68408	4.34733	0.47406	0.491127	Promoter (<=1kb)	4	143559457	143913947	354491	1	105377459	ENST00000641328.1	0	NA	LOC105377459	uncharacterized LOC105377459
chr5	172777270	172778419	1150	1.68402	4.02206	0.489011	0.484371	Promoter (<=1kb)	5	172776709	172777898	1190	1	105377730	ENST00000652842.1	561	NA	LOC105377730	uncharacterized LOC105377730
chr17	42421870	42423255	1386	1.68391	2.13903	0.655605	0.418118	Promoter (<=1kb)	17	42402449	42423256	20808	2	284119	ENST00000357037.6	1	ENSG00000177469	CAVIN1	caveolae associated protein 1
chr2	72825350	72826441	1092	1.6839	3.30451	0.529918	0.466643	Promoter (<=1kb)	2	72175984	72826033	650050	2	23233	ENST00000272427.11	0	ENSG00000144036	EXOC6B	exocyst complex component 6B
chr5	140351589	140352202	614	1.68355	1.17852	0.856612	0.354691	Intron (ENST00000520443.1/ENST00000520443.1, intron 1 of 1)	5	140332843	140346603	13761	2	1839	ENST00000230990.7	-4986	ENSG00000113070	HBEGF	heparin binding EGF like growth factor
chr3	171247712	171249336	1625	1.68332	1.58115	0.756553	0.384412	Intron (ENST00000436636.7/23043, intron 2 of 32)	3	171157551	171225711	68161	2	23043	ENST00000468757.1	-22001	ENSG00000154310	TNIK	TRAF2 and NCK interacting kinase
chr10	101569655	101570854	1200	1.68322	3.6686	0.50632	0.476738	Promoter (<=1kb)	10	101570560	101596651	26092	1	25911	ENST00000470165.1	0	ENSG00000166171	DPCD	deleted in primary ciliary dyskinesia homolog (mouse)
chr17	47492203	47493071	869	1.68302	3.92952	0.492543	0.482797	Promoter (<=1kb)	17	47450568	47492492	41925	2	653479	ENST00000425159.7	0	NA	MRPL45P2	mitochondrial ribosomal protein L45 pseudogene 2
chr3	46894951	46895615	665	1.68266	1.22921	0.839998	0.3594	Promoter (2-3kb)	3	46892721	46898734	6014	1	5745	ENST00000490109.1	2230	ENSG00000160801	PTH1R	parathyroid hormone 1 receptor
chr13	20163320	20163842	523	1.68266	1.01521	0.914958	0.338805	Promoter (2-3kb)	13	20138255	20161052	22798	2	2700	ENST00000241125.4	-2268	ENSG00000121743	GJA3	gap junction protein alpha 3
chr17	73191594	73193655	2062	1.6823	4.96569	0.446449	0.504028	Promoter (<=1kb)	17	73192632	73208503	15872	1	9382	ENST00000618996.4	0	ENSG00000166685	COG1	component of oligomeric golgi complex 1
chr12	6554042	6554547	506	1.68219	1.99195	0.678036	0.410266	Promoter (1-2kb)	12	6539539	6556042	16504	2	25900	ENST00000619571.5	1495	ENSG00000010295	IFFO1	intermediate filament family orphan 1
chr5	39163789	39165256	1468	1.68184	2.7272	0.580569	0.446092	Intron (ENST00000351578.12/2533, intron 2 of 17)	5	39107308	39127807	20500	2	2533	ENST00000646444.1	-35982	ENSG00000082074	FYB1	FYN binding protein 1
chr14	75653924	75654781	858	1.68181	1.45868	0.776541	0.378204	Intron (ENST00000555385.1/23093, intron 1 of 1)	14	75649791	75660876	11086	2	11161	ENST00000256319.7	6095	ENSG00000133935	ERG28	ergosterol biosynthesis 28 homolog
chr15	75335617	75336665	1049	1.68165	1.73222	0.724687	0.394613	Promoter (<=1kb)	15	75336020	75340270	4251	1	54939	ENST00000567195.5	0	ENSG00000140365	COMMD4	COMM domain containing 4
chr12	124388795	124389655	861	1.68158	2.48054	0.608918	0.435198	Promoter (<=1kb)	12	124372460	124388824	16365	2	9612	ENST00000448614.1	0	ENSG00000196498	NCOR2	nuclear receptor corepressor 2
chr8	141265186	141266422	1237	1.68149	3.89027	0.492876	0.482649	Intron (ENST00000517878.6/57210, intron 1 of 8)	8	141254565	141256817	2253	1	105375787	ENST00000518520.1	10621	ENSG00000254019	LOC105375787	uncharacterized LOC105375787
chr11	128859661	128860434	774	1.681	1.26927	0.827468	0.363008	Intron (ENST00000392665.6/3758, intron 1 of 1)	11	128836315	128867296	30982	2	3758	ENST00000392665.6	6862	ENSG00000151704	KCNJ1	potassium inwardly rectifying channel subfamily J member 1
chr10	132248735	132249684	950	1.681	1.20509	0.84745	0.357278	Promoter (<=1kb)	10	132207492	132249108	41617	2	282974	ENST00000462160.5	0	ENSG00000165752	STK32C	serine/threonine kinase 32C
chr3	49017723	49018792	1070	1.68098	4.21146	0.478418	0.489142	Promoter (<=1kb)	3	49015488	49018564	3077	2	55152	ENST00000441576.6	0	ENSG00000178149	DALRD3	DALR anticodon binding domain containing 3
chr17	80414447	80415798	1352	1.68074	4.81671	0.451386	0.501679	Promoter (<=1kb)	17	80351828	80415118	63291	2	100294362	ENST00000575034.5	0	ENSG00000263069	RNF213-AS1	RNF213 antisense RNA 1
chr19	12918916	12919977	1062	1.68059	4.13515	0.481737	0.487639	Promoter (<=1kb)	19	12898786	12919293	20508	2	256126	ENST00000293695.8	0	ENSG00000161860	SYCE2	synaptonemal complex central element protein 2
chr19	9914020	9915308	1289	1.68045	2.57602	0.596272	0.440006	Promoter (<=1kb)	19	9853718	9913836	60119	2	93145	ENST00000593091.2	-184	ENSG00000105088	OLFM2	olfactomedin 2
chr14	91330847	91332290	1444	1.68023	1.53648	0.757863	0.384001	Intron (ENST00000389857.11/440193, intron 10 of 29)	14	91338054	91338856	803	2	440193	ENST00000554051.1	6566	ENSG00000015133	CCDC88C	coiled-coil domain containing 88C
chr2	197168193	197169454	1262	1.68023	1.41093	0.788223	0.374641	Intron (ENST00000282272.15/91526, intron 2 of 27)	2	197197991	197199273	1283	1	101927596	ENST00000449346.1	-28537	ENSG00000231621	ANKRD44-AS1	ANKRD44 antisense RNA 1
chr10	71396153	71397374	1222	1.68023	1.27462	0.825746	0.363508	Promoter (<=1kb)	10	71396920	71815947	419028	1	64072	ENST00000224721.12	0	ENSG00000107736	CDH23	cadherin related 23
chr12	51951096	51952414	1319	1.68022	4.29737	0.473992	0.491158	Promoter (<=1kb)	12	51951699	51997078	45380	1	91	ENST00000257963.9	0	ENSG00000135503	ACVR1B	activin A receptor type 1B
chr5	39216901	39218383	1483	1.68019	4.57587	0.461708	0.496829	Promoter (1-2kb)	5	39105252	39219563	114312	2	2533	ENST00000351578.12	1180	ENSG00000082074	FYB1	FYN binding protein 1
chr8	38756685	38757701	1017	1.68014	2.28336	0.632535	0.426429	Promoter (<=1kb)	8	38757239	38831177	73939	1	6867	ENST00000521642.5	0	ENSG00000147526	TACC1	transforming acidic coiled-coil containing protein 1
chr16	80540362	80541315	954	1.6796	4.18794	0.478842	0.48895	Promoter (<=1kb)	16	80155249	80540947	385699	2	102724084	ENST00000565050.5	0	NA	DYNLRB2-AS1	DYNLRB2 antisense RNA 1
chr15	78507065	78508040	976	1.67952	3.47464	0.514853	0.473048	Promoter (<=1kb)	15	78507564	78537372	29809	1	123688	ENST00000408962.6	0	ENSG00000188266	HYKK	hydroxylysine kinase
chr19	12867171	12867960	790	1.67949	1.97784	0.67319	0.411944	Promoter (<=1kb)	19	12868601	12873640	5040	1	22983	ENST00000590553.1	-641	ENSG00000105613	MAST1	microtubule associated serine/threonine kinase 1
chr18	79987851	79989078	1228	1.67936	5.21332	0.435522	0.509294	Promoter (<=1kb)	18	79970813	79988563	17751	2	10907	ENST00000269601.10	0	ENSG00000141759	TXNL4A	thioredoxin like 4A
chr16	57083745	57085063	1319	1.67894	3.15346	0.538149	0.463203	Promoter (2-3kb)	16	57080999	57082633	1635	1	84166	ENST00000543049.1	2746	ENSG00000140853	NLRC5	NLR family CARD domain containing 5
chr20	45890205	45891809	1605	1.67892	4.28206	0.473959	0.491173	Promoter (<=1kb)	20	45888625	45890476	1852	2	140825	ENST00000545238.1	0	ENSG00000124257	NEURL2	neuralized E3 ubiquitin protein ligase 2
chr6	27251005	27252323	1319	1.67888	3.51569	0.513396	0.473675	Promoter (<=1kb)	6	27251071	27255820	4750	1	10279	ENST00000495683.5	0	ENSG00000112812	PRSS16	serine protease 16
chr11	2376944	2378725	1782	1.67886	3.82026	0.495648	0.481421	Promoter (<=1kb)	11	2328749	2377989	49241	2	101927682	ENST00000427151.1	0	ENSG00000238184	CD81-AS1	CD81 antisense RNA 1
chr11	68038777	68040923	2147	1.67884	3.9241	0.490727	0.483605	Promoter (<=1kb)	11	68039025	68050895	11871	1	10312	ENST00000265686.8	0	ENSG00000110719	TCIRG1	T cell immune regulator 1, ATPase H+ transporting V0 subunit a3
chr17	7174042	7175686	1645	1.67879	1.37086	0.798395	0.371576	Promoter (1-2kb)	17	7173558	7177046	3489	2	432	ENST00000574330.5	1360	ENSG00000141505	ASGR1	asialoglycoprotein receptor 1
chr12	6341541	6342108	568	1.67876	2.20148	0.643975	0.422277	Promoter (<=1kb)	12	6328771	6342076	13306	2	7132	ENST00000162749.7	0	ENSG00000067182	TNFRSF1A	TNF receptor superfamily member 1A
chr9	137628280	137629252	973	1.67876	1.92149	0.688604	0.406642	Intron (ENST00000637510.1/92714, intron 1 of 1)	9	137620047	137711030	90984	1	79813	ENST00000637335.1	8233	ENSG00000181090	EHMT1	euchromatic histone lysine methyltransferase 1
chr16	2963818	2965241	1424	1.67873	3.51043	0.512855	0.473908	Promoter (<=1kb)	16	2964216	2968380	4165	1	79412	ENST00000572045.5	0	ENSG00000131650	KREMEN2	kringle containing transmembrane protein 2
chr11	64887512	64888622	1111	1.67854	3.51755	0.51277	0.473945	Promoter (<=1kb)	11	64874478	64888296	13819	2	10938	ENST00000457202.1	0	ENSG00000110047	EHD1	EH domain containing 1
chr17	40013178	40014344	1167	1.67833	2.1929	0.645091	0.421876	Promoter (1-2kb)	17	40015361	40016917	1557	1	1440	ENST00000583218.5	-1017	ENSG00000108342	CSF3	colony stimulating factor 3
chr11	304909	305318	410	1.67812	1.68011	0.726908	0.39389	Promoter (2-3kb)	11	307631	309230	1600	1	10581	ENST00000533141.1	-2313	ENSG00000185201	IFITM2	interferon induced transmembrane protein 2
chr5	39166770	39167646	877	1.67812	1.24964	0.833089	0.361384	Intron (ENST00000351578.12/2533, intron 2 of 17)	5	39107284	39203027	95744	2	2533	ENST00000515010.5	35381	ENSG00000082074	FYB1	FYN binding protein 1
chr22	19909435	19910582	1148	1.67812	1.1909	0.851825	0.356039	Intron (ENST00000400518.5/10587, intron 8 of 17)	22	19895016	19915789	20774	2	10587	ENST00000475995.3	5207	ENSG00000184470	TXNRD2	thioredoxin reductase 2
chr16	85461959	85462958	1000	1.67744	1.00537	0.885048	0.346826	Intron (ENST00000637419.1/23199, intron 2 of 2)	16	85555967	85654346	98380	1	23199	ENST00000635906.1	-93009	ENSG00000131149	GSE1	Gse1 coiled-coil protein
chr7	1741928	1743240	1313	1.67721	2.356	0.623519	0.429745	Promoter (<=1kb)	7	1738630	1742272	3643	2	101927125	ENST00000453348.1	0	ENSG00000236081	ELFN1-AS1	ELFN1 antisense RNA 1
chr9	221964	223272	1309	1.67687	1.08914	0.887655	0.346116	Intron (ENST00000469197.5/81704, intron 1 of 4)	9	213108	215893	2786	2	157983	ENST00000382387.4	-6071	ENSG00000183784	DOCK8-AS1	DOCK8 antisense RNA 1
chr14	69191174	69192138	965	1.67675	3.33575	0.523335	0.469425	Promoter (<=1kb)	14	69183017	69191430	8414	2	105370550	ENST00000653782.1	0	NA	GALNT16-AS1	GALNT16 and EXD2 antisense RNA 1
chr19	2819313	2820550	1238	1.67673	4.33302	0.470327	0.492839	Promoter (<=1kb)	19	2819868	2836735	16868	1	115196	ENST00000317243.10	0	ENSG00000172006	ZNF554	zinc finger protein 554
chr16	19884353	19886770	2418	1.67657	3.41423	0.518032	0.471684	Promoter (<=1kb)	16	19856691	19884848	28158	2	51704	ENST00000300571.7	0	ENSG00000167191	GPRC5B	G protein-coupled receptor class C group 5 member B
chr1	10472009	10472907	899	1.67641	4.38013	0.468211	0.493813	Promoter (<=1kb)	1	10456522	10472529	16008	2	1676	ENST00000377038.8	0	ENSG00000160049	DFFA	DNA fragmentation factor subunit alpha
chr7	26166595	26168030	1436	1.67634	2.05697	0.665176	0.414741	Intron (ENST00000056233.4/9603, intron 1 of 3)	7	26178003	26183874	5872	1	9603	ENST00000607375.1	-9973	ENSG00000050344	NFE2L3	nuclear factor, erythroid 2 like 3
chr17	32265823	32267588	1766	1.67628	1.64415	0.73379	0.39166	Promoter (<=1kb)	17	32265832	32324659	58828	1	162494	ENST00000269051.9	0	ENSG00000141314	RHBDL3	rhomboid like 3
chr8	41994865	41996244	1380	1.67597	2.42605	0.61129	0.434305	Intron (ENST00000265713.8/7994, intron 2 of 16)	8	41974800	41977490	2691	2	7994	ENST00000463961.1	-17375	ENSG00000083168	KAT6A	lysine acetyltransferase 6A
chr2	27322319	27323699	1381	1.67547	4.29221	0.471681	0.492217	Promoter (<=1kb)	2	27309492	27322564	13073	2	4358	ENST00000233545.6	0	ENSG00000115204	MPV17	mitochondrial inner membrane protein MPV17
chr14	102304644	102305684	1041	1.67546	4.75217	0.451529	0.501612	Promoter (<=1kb)	14	102228827	102305168	76342	2	5891	ENST00000521766.5	0	ENSG00000080823	MOK	MOK protein kinase
chr19	55484605	55485707	1103	1.67502	3.40396	0.517962	0.471715	Promoter (<=1kb)	19	55485188	55487566	2379	1	57106	ENST00000205194.5	0	ENSG00000090971	NAT14	N-acetyltransferase 14 (putative)
chr2	201236116	201236534	419	1.67493	2.03983	0.667343	0.413982	Promoter (2-3kb)	2	201233506	201281915	48410	1	841	ENST00000392258.7	2610	ENSG00000064012	CASP8	caspase 8
chr16	28973985	28975319	1335	1.67489	4.13438	0.478692	0.489017	Promoter (<=1kb)	16	28974221	28979244	5024	1	83985	ENST00000567771.5	0	ENSG00000169682	SPNS1	sphingolipid transporter 1 (putative)
chr19	34676842	34678232	1391	1.6745	5.46525	0.423644	0.515126	Promoter (<=1kb)	19	34590644	34677159	86516	2	284402	ENST00000601241.6	0	ENSG00000205209	SCGB2B2	secretoglobin family 2B member 2
chr10	101587665	101588696	1032	1.6744	3.55176	0.508578	0.475757	Promoter (<=1kb)	10	101588309	101608902	20594	1	25911	ENST00000626968.2	0	ENSG00000166171	DPCD	deleted in primary ciliary dyskinesia homolog (mouse)
chr6	25040793	25042987	2195	1.67421	4.26641	0.472376	0.491898	Promoter (<=1kb)	6	25014952	25042170	27219	2	102724765	ENST00000606385.1	0	NA	LOC102724765	uncharacterized LOC102724765
chr19	45792129	45793404	1276	1.67396	4.57676	0.458498	0.498329	Promoter (<=1kb)	19	45782947	45792802	9856	2	1762	ENST00000377735.7	0	ENSG00000185800	DMWD	DM1 locus, WD repeat containing
chr21	44454770	44456046	1277	1.67388	3.70942	0.498673	0.480086	Promoter (<=1kb)	21	44450986	44455284	4299	2	100861510	ENST00000426578.1	0	ENSG00000229356	LRRC3-DT	LRRC3 divergent transcript
chr16	84754105	84755166	1062	1.67369	1.87507	0.689523	0.406329	Intron (ENST00000563892.5/9100, intron 3 of 6)	16	84759278	84764170	4893	1	9100	ENST00000563433.1	-4112	ENSG00000103194	USP10	ubiquitin specific peptidase 10
chr18	13566989	13568033	1045	1.67369	1.72708	0.716848	0.397182	Intron (ENST00000679177.1/753, intron 3 of 5)	18	13542407	13543214	808	1	102724615	ENST00000587440.1	24582	NA	LOC102724615	uncharacterized LOC102724615
chr5	39057434	39059213	1780	1.67369	1.65886	0.73034	0.392776	Intron (ENST00000357387.8/253260, intron 2 of 37)	5	38940015	39074389	134375	2	253260	ENST00000511516.5	15176	ENSG00000164327	RICTOR	RPTOR independent companion of MTOR complex 2
chr6	107730219	107730920	702	1.67366	2.18776	0.644003	0.422267	Promoter (1-2kb)	6	107718445	107732103	13659	2	256380	ENST00000476798.1	1183	ENSG00000146285	SCML4	Scm polycomb group protein like 4
chr12	6635403	6636310	908	1.67365	2.72489	0.57572	0.447997	Promoter (<=1kb)	12	6618835	6635959	17125	2	57121	ENST00000329858.9	0	ENSG00000184574	LPAR5	lysophosphatidic acid receptor 5
chr20	13230474	13231808	1335	1.67347	3.02602	0.546413	0.459789	Intron (ENST00000262487.5/140862, intron 1 of 5)	20	13237801	13239674	1874	2	100505536	ENST00000431407.1	7866	NA	ISM1-AS1	ISM1 antisense RNA 1
chr18	79393342	79395060	1719	1.67339	3.68332	0.500004	0.479501	Promoter (<=1kb)	18	79395856	79529325	133470	1	4772	ENST00000253506.9	-796	ENSG00000131196	NFATC1	nuclear factor of activated T cells 1
chr11	64860877	64861412	536	1.67321	3.07961	0.540461	0.462244	Promoter (<=1kb)	11	64855052	64860045	4994	2	10938	ENST00000498472.1	-832	ENSG00000110047	EHD1	EH domain containing 1
chr19	57410669	57411719	1051	1.6732	4.15179	0.476705	0.489921	Promoter (<=1kb)	19	57411161	57421934	10774	1	7565	ENST00000307658.12	0	ENSG00000186272	ZNF17	zinc finger protein 17
chr3	196207093	196208537	1445	1.67312	3.32511	0.52175	0.470098	Promoter (2-3kb)	3	196197452	196211386	13935	2	131540	ENST00000465519.5	2849	ENSG00000163958	ZDHHC19	zinc finger DHHC-type palmitoyltransferase 19
chr22	40240699	40241831	1133	1.673	2.85112	0.562244	0.45336	Intron (ENST00000301923.13/23112, intron 4 of 23)	22	40265003	40321799	56797	1	23112	ENST00000446273.1	-23172	ENSG00000100354	TNRC6B	trinucleotide repeat containing adaptor 6B
chr1	100445257	100446368	1112	1.67296	3.33413	0.521065	0.47039	Intron (ENST00000644844.1/8556, intron 7 of 15)	1	100423732	100443114	19383	1	8556	ENST00000469387.1	21525	ENSG00000079335	CDC14A	cell division cycle 14A
chr22	44025973	44027450	1478	1.67279	2.36146	0.618719	0.431526	Promoter (<=1kb)	22	44026304	44169221	142918	1	29780	ENST00000619710.4	0	ENSG00000188677	PARVB	parvin beta
chr9	137277041	137278383	1343	1.67278	1.82923	0.697542	0.403613	Promoter (<=1kb)	9	137277726	137282641	4916	1	54863	ENST00000357503.3	0	ENSG00000198113	TOR4A	torsin family 4 member A
chr12	11500366	11501080	715	1.67276	1.2493	0.808917	0.368443	Promoter (<=1kb)	12	11393972	11501041	107070	2	653247	ENST00000545829.1	0	ENSG00000121335	PRB2	proline rich protein BstNI subfamily 2
chr6	6003108	6003739	632	1.67276	1.1482	0.840501	0.359256	Promoter (<=1kb)	6	5998715	6002963	4249	2	51299	ENST00000495850.1	-145	ENSG00000124785	NRN1	neuritin 1
chr8	98064258	98065124	867	1.67276	1.02422	0.883376	0.347282	Promoter (<=1kb)	8	98064522	98093610	29089	1	203111	ENST00000545282.1	0	ENSG00000177459	ERICH5	glutamate rich 5
chr16	3031395	3031859	465	1.67235	1.83224	0.696912	0.403826	Promoter (<=1kb)	16	3027682	3031974	4293	2	146439	ENST00000572240.5	115	ENSG00000162069	BICDL2	BICD family like cargo adaptor 2
chr16	5033206	5034457	1252	1.67211	3.92867	0.486817	0.485353	Promoter (<=1kb)	16	5033702	5043999	10298	1	100507589	ENST00000632058.1	0	NA	NAGPA-AS1	NAGPA antisense RNA 1
chr6	35496557	35498133	1577	1.67211	3.91045	0.4877	0.484957	Promoter (<=1kb)	6	35473597	35496950	23354	2	7005	ENST00000402886.9	0	ENSG00000007866	TEAD3	TEA domain transcription factor 3
chr7	151013163	151014564	1402	1.67197	5.18882	0.432674	0.510682	Promoter (<=1kb)	7	151013295	151014304	1010	2	285973	ENST00000404733.2	0	ENSG00000181652	ATG9B	autophagy related 9B
chr14	50821504	50824450	2947	1.67185	3.39887	0.516261	0.472443	Promoter (<=1kb)	14	50821880	50823501	1622	1	105370489	ENST00000555966.1	0	ENSG00000258843	LOC105370489	uncharacterized LOC105370489
chr19	39514712	39515826	1115	1.67182	1.31432	0.791143	0.373758	Promoter (<=1kb)	19	39515113	39520686	5574	1	348303	ENST00000335426.8	0	ENSG00000186838	SELENOV	selenoprotein V
chr7	2232193	2233379	1187	1.67164	4.1065	0.4781	0.489286	Promoter (<=1kb)	7	1815794	2232945	417152	2	8379	ENST00000402746.5	0	ENSG00000002822	MAD1L1	mitotic arrest deficient 1 like 1
chr1	48775957	48777458	1502	1.67154	2.9756	0.544849	0.460432	Promoter (<=1kb)	1	48727519	48776891	49373	2	79656	ENST00000371833.4	0	ENSG00000162373	BEND5	BEN domain containing 5
chr1	27527409	27528529	1121	1.67154	2.46888	0.600279	0.438474	Promoter (1-2kb)	1	27525805	27530561	4757	1	105376892	ENST00000443579.1	1604	NA	LOC105376892	uncharacterized LOC105376892
chr1	9181311	9182813	1503	1.67154	1.67776	0.726154	0.394135	Promoter (<=1kb)	1	9182004	9196284	14281	1	102724571	ENST00000635271.1	0	ENSG00000234546	LNCTAM34A	long non coding transcriptional activator of miR34a
chr22	20130561	20131825	1265	1.67141	4.6287	0.454902	0.500018	Promoter (<=1kb)	22	20131804	20148007	16204	1	29801	ENST00000334554.12	0	ENSG00000099904	ZDHHC8	zinc finger DHHC-type palmitoyltransferase 8
chr1	40404083	40405359	1277	1.67121	2.82845	0.562233	0.453364	Intron (ENST00000435168.6/64744, intron 2 of 6)	1	40396800	40423324	26525	1	64744	ENST00000539317.2	7283	ENSG00000084070	SMAP2	small ArfGAP2
chr2	197785911	197786832	922	1.67115	2.34534	0.616477	0.432362	Promoter (<=1kb)	2	197726879	197786312	59434	2	66037	ENST00000282278.12	0	ENSG00000152430	BOLL	boule homolog, RNA binding protein
chr6	111747234	111747822	589	1.67115	2.04269	0.661036	0.416197	Intron (ENST00000368682.7/2534, intron 3 of 13)	6	111702885	111759114	56230	2	2534	ENST00000462856.6	11292	ENSG00000010810	FYN	FYN proto-oncogene, Src family tyrosine kinase
chr14	89701272	89702466	1195	1.67106	3.03451	0.543651	0.460926	Intron (ENST00000555070.1/1112, intron 2 of 3)	14	89628921	89642671	13751	2	105370616	ENST00000553996.2	-58601	ENSG00000258792	LOC105370616	uncharacterized LOC105370616
chr22	31637579	31638647	1069	1.67095	1.05276	0.875762	0.349368	Promoter (<=1kb)	22	31620578	31638398	17821	2	23761	ENST00000491342.1	0	ENSG00000241878	PISD	phosphatidylserine decarboxylase
chr1	32321411	32322711	1301	1.6705	2.79729	0.565156	0.452192	Intron (ENST00000373548.8/3065, intron 3 of 13)	1	32327189	32331781	4593	1	3065	ENST00000490081.5	-4478	ENSG00000116478	HDAC1	histone deacetylase 1
chr11	68312558	68313576	1019	1.67014	1.10467	0.857826	0.354351	Promoter (<=1kb)	11	68312591	68449275	136685	1	4041	ENST00000294304.12	0	ENSG00000162337	LRP5	LDL receptor related protein 5
chr19	36378687	36379599	913	1.66941	4.53749	0.457795	0.498658	Promoter (<=1kb)	19	36334453	36379201	44749	2	57677	ENST00000270001.12	0	ENSG00000142065	ZFP14	ZFP14 zinc finger protein
chr2	201157767	201158745	979	1.66941	2.33424	0.617596	0.431944	Promoter (<=1kb)	2	201140289	201157823	17535	2	65072	ENST00000415011.6	0	ENSG00000226312	CFLAR-AS1	CFLAR antisense RNA 1
chr14	50777706	50778466	761	1.6694	1.17391	0.835088	0.360808	Intron (ENST00000530997.7/51199, intron 6 of 30)	14	50771986	50772998	1013	2	51199	ENST00000474937.1	-4708	ENSG00000100503	NIN	ninein
chr1	151007723	151009130	1408	1.66917	5.12636	0.433717	0.510172	Promoter (<=1kb)	1	150996835	151008365	11531	2	55793	ENST00000361936.9	0	ENSG00000143409	MINDY1	MINDY lysine 48 deubiquitinase 1
chr2	176096557	176098266	1710	1.66909	2.17451	0.640472	0.423542	Promoter (1-2kb)	2	176099795	176102489	2695	1	3238	ENST00000406506.4	-1529	ENSG00000170178	HOXD12	homeobox D12
chr20	13220164	13222239	2076	1.66875	3.89328	0.486704	0.485403	Promoter (<=1kb)	20	13221274	13300651	79378	1	140862	ENST00000262487.5	0	ENSG00000101230	ISM1	isthmin 1
chr1	167121056	167121850	795	1.6687	1.07794	0.8689	0.351263	Intron (ENST00000361200.7/92235, intron 5 of 5)	1	167094850	167129165	34316	1	92235	ENST00000443333.1	26206	ENSG00000198842	STYXL2	serine/threonine/tyrosine interacting like 2
chr16	21820025	21820971	947	1.66868	3.06972	0.53938	0.462692	Promoter (<=1kb)	16	21797750	21820384	22635	2	730092	ENST00000551901.6	0	NA	RRN3P1	RRN3 pseudogene 1
chr14	92121187	92122756	1570	1.66849	5.11915	0.433682	0.510189	Promoter (<=1kb)	14	92116122	92121724	5603	2	4707	ENST00000553514.5	0	ENSG00000183648	NDUFB1	NADH:ubiquinone oxidoreductase subunit B1
chr10	91198506	91199184	679	1.6682	2.04242	0.660458	0.416401	Intron (ENST00000614189.4/84333, intron 1 of 9)	10	91220151	91284329	64179	1	84333	ENST00000543648.5	-20967	ENSG00000180628	PCGF5	polycomb group ring finger 5
chr12	6627049	6628275	1227	1.66806	2.84472	0.559379	0.454513	Intron (ENST00000431922.1/57121, intron 1 of 1)	12	6618835	6631649	12815	2	57121	ENST00000431922.1	3374	ENSG00000184574	LPAR5	lysophosphatidic acid receptor 5
chr20	41172755	41173746	992	1.66805	1.27522	0.805159	0.369558	Promoter (<=1kb)	20	41173507	41182960	9454	1	5335	ENST00000609821.5	0	ENSG00000124181	PLCG1	phospholipase C gamma 1
chr3	56787569	56788534	966	1.66785	3.41847	0.513157	0.473778	Intron (ENST00000338458.8/50650, intron 4 of 12)	3	56727421	56775657	48237	2	50650	ENST00000413728.6	-11912	ENSG00000163947	ARHGEF3	Rho guanine nucleotide exchange factor 3
chr11	34173903	34175088	1186	1.66764	2.505	0.594799	0.440572	Intron (ENST00000435224.3/25841, intron 3 of 16)	11	34141987	34146252	4266	1	55226	ENST00000532555.1	31916	ENSG00000135372	NAT10	N-acetyltransferase 10
chr17	6913786	6914501	716	1.66744	1.3329	0.789499	0.374255	Intron (ENST00000574183.1/ENST00000574183.1, intron 1 of 1)	17	6898910	6900345	1436	1	245	ENST00000575787.1	14876	ENSG00000262943	ALOX12P2	arachidonate 12-lipoxygenase pseudogene 2
chr19	12064317	12065540	1224	1.66738	2.26771	0.626446	0.428664	Promoter (<=1kb)	19	12064731	12075881	11151	1	284391	ENST00000550826.1	0	ENSG00000223547	ZNF844	zinc finger protein 844
chr12	6444281	6445519	1239	1.6672	3.13236	0.531985	0.465776	Promoter (<=1kb)	12	6444955	6451713	6759	1	939	ENST00000266557.4	0	ENSG00000139193	CD27	CD27 molecule
chr1	39559080	39560326	1247	1.66703	2.80133	0.563417	0.452889	Promoter (<=1kb)	1	39522280	39559671	37392	2	728448	ENST00000331856.7	0	ENSG00000243970	PPIEL	peptidylprolyl isomerase E like pseudogene
chr19	10460717	10461835	1119	1.66699	3.55296	0.503636	0.477909	Promoter (1-2kb)	19	10458969	10467366	8398	1	5141	ENST00000590407.1	1748	ENSG00000065989	PDE4A	phosphodiesterase 4A
chr7	12570198	12571113	916	1.66687	1.05874	0.877857	0.348792	Promoter (<=1kb)	7	12570577	12653104	82528	1	85477	ENST00000341757.9	0	ENSG00000006747	SCIN	scinderin
chr20	37345677	37346841	1165	1.66633	1.37983	0.778062	0.377737	Promoter (<=1kb)	20	37346140	37406050	59911	1	6714	ENST00000373578.7	0	ENSG00000197122	SRC	SRC proto-oncogene, non-receptor tyrosine kinase
chr8	28347226	28349058	1833	1.666	4.0031	0.480141	0.488361	Promoter (2-3kb)	8	28348278	28351566	3289	2	55893	ENST00000520535.1	2508	ENSG00000186918	ZNF395	zinc finger protein 395
chr2	241616982	241618283	1302	1.66583	3.03974	0.539798	0.462519	Promoter (<=1kb)	2	241584405	241617501	33097	2	51078	ENST00000402136.5	0	ENSG00000176946	THAP4	THAP domain containing 4
chr17	67390077	67391317	1241	1.66583	2.68579	0.575181	0.44821	Intron (ENST00000581322.6/26207, intron 1 of 8)	17	67378966	67578225	199260	1	26207	ENST00000584471.5	11111	ENSG00000154217	PITPNC1	phosphatidylinositol transfer protein cytoplasmic 1
chr10	73644000	73645125	1126	1.66582	1.15612	0.844205	0.3582	Promoter (2-3kb)	10	73631612	73641474	9863	2	58529	ENST00000359322.5	-2526	ENSG00000177791	MYOZ1	myozenin 1
chr2	110204034	110205574	1541	1.66577	3.28914	0.520205	0.470757	Promoter (<=1kb)	2	110122311	110205042	82732	2	4867	ENST00000316534.8	0	ENSG00000144061	NPHP1	nephrocystin 1
chr1	147084141	147085321	1181	1.66577	4.06143	0.477678	0.489478	Promoter (<=1kb)	1	147084616	147084756	141	2	101447996	ENST00000651973.1	0	ENSG00000286172	RNVU1-8	RNA, variant U1 small nuclear 8
chr22	21665640	21666790	1151	1.66543	4.148	0.473045	0.491592	Promoter (<=1kb)	22	21666000	21689606	23607	1	23759	ENST00000680463.1	0	ENSG00000100023	PPIL2	peptidylprolyl isomerase like 2
chr1	12478347	12479173	827	1.66535	1.47259	0.756067	0.384565	Promoter (<=1kb)	1	12478549	12506972	28424	1	55187	ENST00000645148.1	0	ENSG00000048707	VPS13D	vacuolar protein sorting 13 homolog D
chr17	32349632	32351098	1467	1.66503	5.01099	0.436067	0.509029	Promoter (<=1kb)	17	32334491	32350023	15533	2	64149	ENST00000583774.5	0	ENSG00000108666	C17orf75	chromosome 17 open reading frame 75
chr1	146472263	146472978	716	1.6649	1.59169	0.72954	0.393035	Promoter (<=1kb)	1	146472566	146525291	52726	1	100288805	ENST00000621489.2	0	NA	HYDIN2	HYDIN axonemal central pair apparatus protein 2 (pseudogene)
chr5	56477551	56477978	428	1.6649	1.4821	0.754159	0.385165	Intron (ENST00000665339.1/102467147, intron 1 of 3)	5	56457795	56481769	23975	2	102467147	ENST00000506836.5	3791	ENSG00000248727	LINC01948	long intergenic non-protein coding RNA 1948
chr19	3093885	3094357	473	1.6649	1.37092	0.781448	0.376701	Promoter (<=1kb)	19	3094362	3123999	29638	1	2767	ENST00000078429.9	-5	ENSG00000088256	GNA11	G protein subunit alpha 11
chr2	69714472	69715283	812	1.6649	1.18142	0.836684	0.36035	Intron (ENST00000418066.2/307, intron 2 of 3)	2	69720791	69825774	104984	1	307	ENST00000477632.5	-5508	ENSG00000196975	ANXA4	annexin A4
chr8	134691066	134691886	821	1.6649	1.10995	0.861001	0.353462	Intron (ENST00000520356.5/57623, intron 1 of 13)	8	134477788	134696554	218767	2	57623	ENST00000520356.5	4668	ENSG00000066827	ZFAT	zinc finger and AT-hook domain containing
chr1	112668420	112669127	708	1.6649	1.00648	0.897769	0.343384	Promoter (1-2kb)	1	112666920	112669594	2675	1	829	ENST00000476820.1	1500	ENSG00000116489	CAPZA1	capping actin protein of muscle Z-line subunit alpha 1
chr17	1228354	1230164	1811	1.66451	2.38715	0.609352	0.435034	Promoter (<=1kb)	17	1003519	1229738	226220	2	29	ENST00000574139.7	0	ENSG00000159842	ABR	ABR activator of RhoGEF and GTPase
chr16	58176726	58177717	992	1.66447	1.26456	0.811253	0.367753	Intron (ENST00000566813.5/1459, intron 3 of 10)	16	58157940	58169126	11187	2	1459	ENST00000676463.1	-7600	ENSG00000070770	CSNK2A2	casein kinase 2 alpha 2
chr17	80764710	80765882	1173	1.66433	2.26478	0.62619	0.428759	Intron (ENST00000574767.5/57521, intron 5 of 11)	17	80743287	80966371	223085	1	57521	ENST00000575542.5	21423	ENSG00000141564	RPTOR	regulatory associated protein of MTOR complex 1
chr19	15297018	15297879	862	1.66406	2.33354	0.60758	0.435703	Intron (ENST00000679869.1/23476, intron 1 of 19)	19	15247047	15280451	33405	2	23476	ENST00000371835.8	-16567	ENSG00000141867	BRD4	bromodomain containing 4
chr22	17236581	17237718	1138	1.66406	1.19346	0.833503	0.361264	Intron (ENST00000649310.1/51816, intron 1 of 1)	22	17179304	17221989	42686	2	51816	ENST00000399839.5	-14592	ENSG00000093072	ADA2	adenosine deaminase 2
chr10	103712556	103713487	932	1.66406	1.16904	0.841533	0.358961	Intron (ENST00000369774.8/9644, intron 5 of 14)	10	103599520	103693623	94104	2	9644	ENST00000315994.6	-18933	ENSG00000107957	SH3PXD2A	SH3 and PX domains 2A
chr5	132007792	132008299	508	1.66406	1.11379	0.860427	0.353622	Intron (ENST00000652469.1/23305, intron 1 of 25)	5	131951790	132011563	59774	2	23305	ENST00000652493.1	3264	ENSG00000164398	ACSL6	acyl-CoA synthetase long chain family member 6
chr17	47066806	47067828	1023	1.66406	2.98854	0.54389	0.460827	Promoter (<=1kb)	17	46983417	47067483	84067	2	101927060	ENST00000656035.1	0	ENSG00000262879	LOC101927060	uncharacterized LOC101927060
chr10	62037840	62039378	1539	1.66397	2.34477	0.614946	0.432934	Intron (ENST00000279873.12/84159, intron 4 of 9)	10	62046662	62057268	10607	1	84159	ENST00000647323.1	-7284	ENSG00000150347	ARID5B	AT-rich interaction domain 5B
chr4	153528883	153531026	2144	1.6638	2.59558	0.582754	0.445237	Intron (ENST00000409663.7/23240, intron 3 of 34)	4	153554181	153558771	4591	1	23240	ENST00000462540.1	-23155	ENSG00000121210	TMEM131L	transmembrane 131 like
chr7	73606579	73607755	1177	1.66368	1.18698	0.835968	0.360555	Promoter (<=1kb)	7	73596710	73606824	10115	2	51085	ENST00000476404.5	0	ENSG00000009950	MLXIPL	MLX interacting protein like
chr12	57124220	57124695	476	1.66368	1.1328	0.854113	0.355394	Intron (ENST00000556155.5/6778, intron 1 of 21)	12	57128483	57213361	84879	1	4035	ENST00000243077.8	-3788	ENSG00000123384	LRP1	LDL receptor related protein 1
chr11	68842708	68844145	1438	1.66356	4.30113	0.464894	0.495348	Promoter (<=1kb)	11	68812438	68844410	31973	2	1374	ENST00000561996.1	265	ENSG00000110090	CPT1A	carnitine palmitoyltransferase 1A
chr11	72781316	72782384	1069	1.66331	2.54913	0.58831	0.443076	Promoter (<=1kb)	11	72754893	72781842	26950	2	10809	ENST00000545082.5	0	ENSG00000214530	STARD10	StAR related lipid transfer domain containing 10
chr15	82749889	82751260	1372	1.66311	3.05026	0.53782	0.46334	Promoter (<=1kb)	15	82750564	82754937	4374	1	100505616	ENST00000544685.2	0	ENSG00000250988	SNHG21	small nucleolar RNA host gene 21
chr15	92797021	92797785	765	1.66297	1.30525	0.80064	0.370905	Promoter (1-2kb)	15	92795647	92796439	793	1	728619	ENST00000557146.1	1374	NA	ASB9P1	ankyrin repeat and SOCS box containing 9 pseudogene 1
chr2	44183503	44184732	1230	1.66264	1.48818	0.754295	0.385122	Intron (ENST00000419807.5/5495, intron 2 of 5)	2	44168910	44231472	62563	1	5495	ENST00000345249.8	14593	ENSG00000138032	PPM1B	protein phosphatase, Mg2+/Mn2+ dependent 1B
chr5	112995786	112996692	907	1.66264	1.16069	0.845652	0.357788	Intron (ENST00000515408.5/167227, intron 4 of 9)	5	113001126	113008307	7182	1	167227	ENST00000508359.1	-4434	ENSG00000172795	DCP2	decapping mRNA 2
chr16	25055369	25056201	833	1.66232	1.57404	0.735026	0.391262	Intron (ENST00000575694.1/ENST00000575694.1, intron 1 of 1)	16	25066937	25068943	2007	1	283887	ENST00000571219.1	-10736	ENSG00000262155	LINC02175	long intergenic non-protein coding RNA 2175
chr14	20332556	20333781	1226	1.66227	3.31332	0.516296	0.472428	Promoter (<=1kb)	14	20311368	20333010	21643	2	57820	ENST00000398160.6	0	ENSG00000100814	CCNB1IP1	cyclin B1 interacting protein 1
chr14	102776769	102778752	1984	1.66177	4.40221	0.459842	0.4977	Promoter (<=1kb)	14	102777449	102911500	134052	1	7187	ENST00000392745.8	0	ENSG00000131323	TRAF3	TNF receptor associated factor 3
chr1	206808668	206809877	1210	1.66173	1.57847	0.734428	0.391454	Intron (ENST00000662320.1/29949, intron 2 of 2)	1	206828877	206842622	13746	1	29949	ENST00000270218.10	-19000	ENSG00000142224	IL19	interleukin 19
chr2	65040122	65041445	1324	1.66146	1.39984	0.776649	0.378171	Intron (ENST00000622718.1/102724233, intron 2 of 2)	2	64953253	65048179	94927	2	107984063	ENST00000669631.1	6734	NA	LOC107984063	uncharacterized LOC107984063
chr13	25874252	25875568	1317	1.66119	1.74896	0.700898	0.402485	Intron (ENST00000381655.7/51761, intron 33 of 36)	13	25827936	25842653	14718	1	51761	ENST00000683461.1	46316	ENSG00000132932	ATP8A2	ATPase phospholipid transporting 8A2
chr1	76269965	76271036	1072	1.66119	1.42203	0.771298	0.379819	Intron (ENST00000328299.4/256435, intron 1 of 4)	1	76313800	76413003	99204	1	256435	ENST00000621530.1	-42764	ENSG00000184005	ST6GALNAC3	ST6 N-acetylgalactosaminide alpha-2,6-sialyltransferase 3
chr15	90657632	90658527	896	1.66094	1.80245	0.691177	0.405767	Promoter (1-2kb)	15	90660207	90664967	4761	1	101929765	ENST00000500496.3	-1680	ENSG00000245479	LINC01585	long intergenic non-protein coding RNA 1585
chr9	124711641	124712525	885	1.66094	1.65046	0.720073	0.396123	Intron (ENST00000487099.7/2649, intron 2 of 9)	9	124693710	124693798	89	1	406956	ENST00000385004.1	17931	ENSG00000207737	MIR181B2	microRNA 181b-2
chr21	43645683	43647288	1606	1.6607	1.77652	0.696058	0.404114	Intron (ENST00000291560.7/11077, intron 3 of 8)	21	43613851	43659470	45620	2	11077	ENST00000443485.1	12182	ENSG00000160207	HSF2BP	heat shock transcription factor 2 binding protein
chr1	1435091	1436022	932	1.6607	1.69076	0.712292	0.398686	Promoter (<=1kb)	1	1435523	1440765	5243	1	64856	ENST00000338660.5	0	ENSG00000179403	VWA1	von Willebrand factor A domain containing 1
chr2	96950889	96951679	791	1.6607	1.48053	0.757439	0.384134	Promoter (<=1kb)	2	96923569	96951935	28367	2	51252	ENST00000520074.1	256	ENSG00000168754	FAM178B	family with sequence similarity 178 member B
chr15	78564987	78566327	1341	1.66051	2.62498	0.578467	0.446916	Promoter (<=1kb)	15	78565520	78595269	29750	1	1138	ENST00000299565.9	0	ENSG00000169684	CHRNA5	cholinergic receptor nicotinic alpha 5 subunit
chr14	104985316	104986257	942	1.66048	4.7971	0.442041	0.506141	Promoter (<=1kb)	14	104985775	104994890	9116	1	122616	ENST00000551606.5	0	ENSG00000140104	CLBA1	clathrin binding box of aftiphilin containing 1
chr11	17230064	17231503	1440	1.66046	1.53306	0.745434	0.387928	Intron (ENST00000528644.5/4925, intron 1 of 2)	11	17208153	17295424	87272	1	4925	ENST00000528644.5	21911	ENSG00000070081	NUCB2	nucleobindin 2
chr20	35079627	35080878	1252	1.66024	1.28687	0.808198	0.368656	Intron (ENST00000252015.3/26133, intron 1 of 18)	20	35002404	35092807	90404	2	26133	ENST00000252015.3	11929	ENSG00000100991	TRPC4AP	transient receptor potential cation channel subfamily C member 4 associated protein
chr1	20731470	20733565	2096	1.65983	4.00642	0.476417	0.490052	Promoter (<=1kb)	1	20719731	20732703	12973	2	400745	ENST00000444387.7	0	ENSG00000189410	SH2D5	SH2 domain containing 5
chr12	131830094	131831320	1227	1.65962	1.94298	0.667458	0.413942	Promoter (1-2kb)	12	131828495	131851274	22780	1	4326	ENST00000545790.6	1599	ENSG00000198598	MMP17	matrix metallopeptidase 17
chr4	10671249	10672358	1110	1.65942	2.48932	0.589052	0.442788	Intron (ENST00000226951.11/116449, intron 1 of 18)	4	10486395	10684768	198374	2	116449	ENST00000226951.11	12410	ENSG00000109684	CLNK	cytokine dependent hematopoietic cell linker
chr19	3705590	3706819	1230	1.65924	1.69925	0.7115	0.398949	Promoter (1-2kb)	19	3708362	3730434	22073	1	27134	ENST00000590545.5	-1543	ENSG00000105289	TJP3	tight junction protein 3
chr20	4720405	4721290	886	1.65906	1.92474	0.670779	0.412782	Promoter (<=1kb)	20	4721909	4728460	6552	1	23627	ENST00000305817.3	-619	ENSG00000171864	PRND	prion like protein doppel
chr2	63855698	63856939	1242	1.65902	3.57863	0.498173	0.480306	Promoter (<=1kb)	2	63855909	63857971	2063	1	7360	ENST00000465515.1	0	ENSG00000169764	UGP2	UDP-glucose pyrophosphorylase 2
chr11	62640498	62641383	886	1.65888	2.8307	0.550994	0.457914	Promoter (1-2kb)	11	62634571	62639471	4901	2	23193	ENST00000524437.5	-1027	ENSG00000089597	GANAB	glucosidase II alpha subunit
chr5	175657780	175659114	1335	1.65872	2.10041	0.643071	0.422603	Promoter (<=1kb)	5	175658030	175686242	28213	1	3274	ENST00000377291.2	0	ENSG00000113749	HRH2	histamine receptor H2
chr3	194671569	194673004	1436	1.65869	4.96925	0.434525	0.509779	Promoter (<=1kb)	3	194640791	194672191	31401	2	55341	ENST00000265245.10	0	ENSG00000041802	LSG1	large 60S subunit nuclear export GTPase 1
chr8	37891129	37892370	1242	1.65869	2.72183	0.567115	0.45141	Intron (ENST00000287263.8/80223, intron 1 of 4)	8	37862759	37899454	36696	2	80223	ENST00000522727.5	7084	ENSG00000156675	RAB11FIP1	RAB11 family interacting protein 1
chr7	116499088	116500547	1460	1.65855	1.99762	0.659029	0.416905	Promoter (<=1kb)	7	116238260	116499465	261206	2	107986838	ENST00000446355.2	0	NA	LOC107986838	uncharacterized LOC107986838
chr2	239297749	239299012	1264	1.6585	3.99103	0.476118	0.490188	Promoter (<=1kb)	2	239089676	239298639	208964	2	9759	ENST00000463007.5	0	ENSG00000068024	HDAC4	histone deacetylase 4
chr14	22829382	22830801	1420	1.65847	4.3801	0.458756	0.498208	Promoter (<=1kb)	14	22829879	22832078	2200	1	122704	ENST00000557543.5	0	ENSG00000172590	MRPL52	mitochondrial ribosomal protein L52
chr18	24118438	24119590	1153	1.6584	1.86973	0.680551	0.4094	Intron (ENST00000304621.10/125488, intron 8 of 13)	18	24123596	24132509	8914	1	125488	ENST00000584424.1	-4006	ENSG00000168234	TTC39C	tetratricopeptide repeat domain 39C
chr17	57995073	57996147	1075	1.6581	2.13367	0.638427	0.424284	Intron (ENST00000665125.1/6426, intron 1 of 2)	17	57982910	57988259	5350	2	7716	ENST00000583932.1	-6814	ENSG00000136451	VEZF1	vascular endothelial zinc finger 1
chr3	101753225	101754193	969	1.6581	1.6702	0.717877	0.396844	Intron (ENST00000489172.5/79598, intron 5 of 7)	3	101732611	101755478	22868	1	79598	ENST00000462076.1	20614	ENSG00000182504	CEP97	centrosomal protein 97
chr6	16331271	16332687	1417	1.65753	3.06357	0.533389	0.465188	Intron (ENST00000244769.8/6310, intron 7 of 8)	6	16289945	16295121	5177	1	2766	ENST00000540478.1	41326	ENSG00000137198	GMPR	guanosine monophosphate reductase
chr4	10099460	10100307	848	1.65685	2.47029	0.59228	0.441541	Promoter (2-3kb)	4	10087706	10096618	8913	2	9948	ENST00000505543.5	-2842	ENSG00000071127	WDR1	WD repeat domain 1
chr6	149933934	149934920	987	1.65616	2.06001	0.650322	0.42	Promoter (<=1kb)	6	149934527	149935620	1094	1	105378052	ENST00000435483.5	0	ENSG00000216621	LOC105378052	uncharacterized LOC105378052
chr14	103871699	103872804	1106	1.65608	2.69543	0.565628	0.452004	Promoter (<=1kb)	14	103873148	103880378	7231	1	105370689	ENST00000658303.1	-344	ENSG00000287346	LOC105370689	uncharacterized LOC105370689
chr4	90127019	90129110	2092	1.65596	3.32146	0.512572	0.47403	Promoter (<=1kb)	4	90127535	90923530	795996	1	401145	ENST00000505073.5	0	ENSG00000184305	CCSER1	coiled-coil serine rich protein 1
chr20	31513937	31515110	1174	1.65586	4.30796	0.46054	0.497374	Promoter (<=1kb)	20	31514410	31569567	55158	1	81502	ENST00000335574.10	0	ENSG00000101294	HM13	histocompatibility minor 13
chr10	124728326	124729539	1214	1.65574	2.43293	0.597423	0.439565	Intron (ENST00000494792.1/9679, intron 6 of 9)	10	124621671	124742970	121300	2	9679	ENST00000392754.7	13431	ENSG00000189319	FAM53B	family with sequence similarity 53 member B
chr15	98647224	98650820	3597	1.65562	5.49483	0.413391	0.520255	Promoter (<=1kb)	15	98648539	98964530	315992	1	3480	ENST00000649865.1	0	ENSG00000140443	IGF1R	insulin like growth factor 1 receptor
chr22	46070062	46072535	2474	1.65493	3.64777	0.491835	0.483112	Promoter (<=1kb)	22	46067356	46069891	2536	2	642648	ENST00000412643.1	-171	NA	LOC642648	uncharacterized LOC642648
chr16	30021021	30022134	1114	1.65484	2.67698	0.567942	0.45108	Promoter (<=1kb)	16	30009226	30021295	12070	2	8448	ENST00000574405.5	0	ENSG00000149927	DOC2A	double C2 domain alpha
chr19	3699322	3701201	1880	1.65469	3.85275	0.480725	0.488096	Promoter (<=1kb)	19	3630183	3700390	70208	2	23396	ENST00000679885.1	0	ENSG00000186111	PIP5K1C	phosphatidylinositol-4-phosphate 5-kinase type 1 gamma
chr1	2414315	2414830	516	1.65451	2.74273	0.561075	0.45383	Promoter (<=1kb)	1	2408530	2413797	5268	2	5192	ENST00000508384.5	-518	ENSG00000157911	PEX10	peroxisomal biogenesis factor 10
chr14	103520742	103522323	1582	1.65412	3.97278	0.474881	0.490752	Promoter (<=1kb)	14	103519668	103521322	1655	2	1152	ENST00000554989.1	0	ENSG00000166165	CKB	creatine kinase B
chr15	41501377	41502930	1554	1.65411	3.09034	0.527805	0.467533	Promoter (<=1kb)	15	41501439	41503099	1661	1	3706	ENST00000462816.5	0	ENSG00000137825	ITPKA	inositol-trisphosphate 3-kinase A
chr1	156624134	156626374	2241	1.65411	2.99526	0.536395	0.463933	Promoter (<=1kb)	1	156624064	156625535	1472	1	60484	ENST00000494218.1	70	ENSG00000132702	HAPLN2	hyaluronan and proteoglycan link protein 2
chr1	12617154	12620691	3538	1.65411	5.64945	0.407189	0.523402	Promoter (<=1kb)	1	12567910	12618210	50301	2	9249	ENST00000616661.5	0	ENSG00000162496	DHRS3	dehydrogenase/reductase 3
chr16	2715272	2716178	907	1.65369	3.21481	0.517184	0.472048	Promoter (<=1kb)	16	2712419	2715565	3147	2	83886	ENST00000543965.5	0	ENSG00000172382	PRSS27	serine protease 27
chr17	43024306	43025289	984	1.65355	4.23789	0.462449	0.496484	Promoter (<=1kb)	17	43017832	43025123	7292	2	10493	ENST00000590924.5	0	ENSG00000108828	VAT1	vesicle amine transport 1
chr16	84599519	84601798	2280	1.65352	4.10032	0.468778	0.493552	Intron (ENST00000262428.5/23406, intron 2 of 3)	16	84566550	84590479	23930	2	23406	ENST00000561707.1	-9040	ENSG00000103187	COTL1	coactosin like F-actin binding protein 1
chr22	42443558	42444973	1416	1.6535	3.23015	0.51615	0.472491	Intron (ENST00000428765.1/101927344, intron 2 of 3)	22	42438023	42446195	8173	1	101927344	ENST00000428765.1	5535	NA	LOC101927344	uncharacterized LOC101927344
chr19	19540261	19541614	1354	1.6534	3.36196	0.507384	0.476275	Promoter (<=1kb)	19	19540659	19542650	1992	1	148113	ENST00000588333.2	0	ENSG00000160161	CILP2	cartilage intermediate layer protein 2
chr8	52939608	52941827	2220	1.65327	3.22039	0.516861	0.472186	Promoter (<=1kb)	8	52939182	52943734	4553	1	2831	ENST00000674939.1	426	ENSG00000288611	NPBWR1	neuropeptides B and W receptor 1
chr1	28232499	28233315	817	1.65291	3.32742	0.509739	0.475254	Promoter (<=1kb)	1	28200278	28233029	32752	2	22826	ENST00000263697.6	0	ENSG00000126698	DNAJC8	DnaJ heat shock protein family (Hsp40) member C8
chr11	64165646	64166652	1007	1.65288	3.06431	0.530388	0.466446	Promoter (<=1kb)	11	63998558	64166113	167556	2	28992	ENST00000255681.7	0	ENSG00000133315	MACROD1	mono-ADP ribosylhydrolase 1
chr12	109476810	109478061	1252	1.65283	4.52272	0.449793	0.502435	Promoter (<=1kb)	12	109448655	109477300	28646	2	83892	ENST00000228495.11	0	ENSG00000110906	KCTD10	potassium channel tetramerization domain containing 10
chr5	181206217	181208176	1960	1.65276	5.31165	0.418784	0.517546	Promoter (<=1kb)	5	181203118	181205293	2176	2	81786	ENST00000334421.5	-924	ENSG00000146054	TRIM7	tripartite motif containing 7
chr16	714467	715917	1451	1.65229	3.55534	0.49542	0.481521	Promoter (<=1kb)	16	715118	719655	4538	1	79006	ENST00000568223.7	0	ENSG00000103260	METRN	meteorin, glial cell differentiation regulator
chr9	130053302	130054546	1245	1.65198	3.55002	0.495795	0.481356	Promoter (<=1kb)	9	130053426	130140164	86739	1	57720	ENST00000372406.5	0	ENSG00000148358	GPR107	G protein-coupled receptor 107
chr20	49982215	49983319	1105	1.65127	4.37352	0.455063	0.499942	Promoter (<=1kb)	20	49982980	49988886	5907	1	6615	ENST00000244050.3	0	ENSG00000124216	SNAI1	snail family transcriptional repressor 1
chr19	1081842	1082899	1058	1.6511	4.55342	0.447318	0.503613	Promoter (<=1kb)	19	1082521	1083329	809	1	23526	ENST00000590512.1	0	ENSG00000180448	ARHGAP45	Rho GTPase activating protein 45
chr14	77707397	77708594	1198	1.65098	4.15788	0.46476	0.49541	Promoter (<=1kb)	14	77708071	77717594	9524	1	81892	ENST00000613856.4	0	ENSG00000119705	SLIRP	SRA stem-loop interacting RNA binding protein
chr17	50372522	50373537	1016	1.65071	4.49536	0.449861	0.502403	Promoter (<=1kb)	17	50373220	50381459	8240	1	146956	ENST00000393271.6	0	ENSG00000154920	EME1	essential meiotic structure-specific endonuclease 1
chr17	64496531	64498751	2221	1.65058	6.10252	0.391755	0.53138	Promoter (<=1kb)	17	64477785	64497054	19270	2	11232	ENST00000539111.7	0	ENSG00000256525	POLG2	DNA polymerase gamma 2, accessory subunit
chr5	177553810	177555234	1425	1.6482	3.67169	0.486343	0.485565	Promoter (<=1kb)	5	177519789	177554563	34775	2	54540	ENST00000514747.6	0	ENSG00000146067	FAM193B	family with sequence similarity 193 member B
chr6	27374601	27375990	1390	1.64791	3.0312	0.530051	0.466588	Promoter (<=1kb)	6	27374615	27399548	24934	1	346157	ENST00000477999.5	0	ENSG00000124613	ZNF391	zinc finger protein 391
chr11	45899328	45900460	1133	1.64787	2.95118	0.537256	0.463574	Promoter (1-2kb)	11	45901933	45902743	811	1	9479	ENST00000497090.1	-1473	ENSG00000121653	MAPK8IP1	mitogen-activated protein kinase 8 interacting protein 1
chr1	29236115	29237600	1486	1.64772	3.02321	0.530008	0.466606	Promoter (<=1kb)	1	29236516	29325661	89146	1	10076	ENST00000345512.7	0	ENSG00000060656	PTPRU	protein tyrosine phosphatase receptor type U
chr16	89827883	89829140	1258	1.64769	2.48893	0.586457	0.443795	Promoter (<=1kb)	16	89828475	89871319	42845	1	84501	ENST00000378247.8	0	ENSG00000204991	SPIRE2	spire type actin nucleation factor 2
chr12	6927421	6928446	1026	1.64764	2.81203	0.549778	0.458411	Promoter (<=1kb)	12	6927959	6942321	14363	1	1822	ENST00000396684.3	0	ENSG00000111676	ATN1	atrophin 1
chr11	66466158	66467514	1357	1.64758	5.54965	0.407697	0.523143	Promoter (<=1kb)	11	66466327	66477334	11008	1	246330	ENST00000618547.4	0	ENSG00000174516	PELI3	pellino E3 ubiquitin protein ligase family member 3
chr16	2926615	2927577	963	1.64758	2.66051	0.565344	0.452117	Intron (ENST00000253928.14/84256, intron 2 of 9)	16	2930797	2940163	9367	1	84256	ENST00000573564.5	-3220	ENSG00000059122	FLYWCH1	FLYWCH-type zinc finger 1
chr9	114902629	114903452	824	1.64749	2.07206	0.643481	0.422456	Promoter (<=1kb)	9	114893723	114904308	10586	2	944	ENST00000474301.1	856	ENSG00000106952	TNFSF8	TNF superfamily member 8
chr11	848263	849682	1420	1.64741	2.63906	0.56709	0.45142	Promoter (<=1kb)	11	848810	867111	18302	1	7106	ENST00000409531.5	0	ENSG00000214063	TSPAN4	tetraspanin 4
chr19	17871987	17872897	911	1.64734	2.5618	0.575901	0.447926	Promoter (<=1kb)	19	17871945	17895174	23230	1	6528	ENST00000222248.4	42	ENSG00000105641	SLC5A5	solute carrier family 5 member 5
chr16	1533381	1534669	1289	1.64724	2.70173	0.559377	0.454514	Promoter (<=1kb)	16	1533666	1555568	21903	1	79652	ENST00000566264.2	0	ENSG00000131634	TMEM204	transmembrane protein 204
chr6	44221458	44221965	508	1.64704	2.23985	0.616304	0.432426	Promoter (1-2kb)	6	44223559	44230665	7107	1	2030	ENST00000371740.10	-1594	ENSG00000112759	SLC29A1	solute carrier family 29 member 1 (Augustine blood group)
chr9	97852858	97854492	1635	1.64696	2.65391	0.563339	0.45292	Promoter (<=1kb)	9	97699625	97853080	153456	2	101928337	ENST00000649461.1	0	ENSG00000236130	PTCSC2	papillary thyroid carcinoma susceptibility candidate 2
chr2	68737441	68738204	764	1.64696	2.08131	0.639119	0.424032	Promoter (2-3kb)	2	68735377	68775239	39863	1	9938	ENST00000496266.1	2064	ENSG00000163219	ARHGAP25	Rho GTPase activating protein 25
chr17	3910940	3911770	831	1.64693	3.5935	0.486548	0.485473	Intron (ENST00000572418.1/5023, intron 1 of 10)	17	3896592	3916452	19861	2	5023	ENST00000572418.1	4682	ENSG00000108405	P2RX1	purinergic receptor P2X 1
chr6	154276810	154278024	1215	1.64687	2.03467	0.645751	0.421638	Intron (ENST00000265198.8/26034, intron 2 of 11)	6	154159682	154247682	88001	2	26034	ENST00000519344.5	-29128	ENSG00000074706	IPCEF1	interaction protein for cytohesin exchange factors 1
chr17	42314496	42315849	1354	1.64684	3.08828	0.520766	0.470517	Promoter (1-2kb)	17	42314848	42317515	2668	2	6774	ENST00000462286.3	1666	ENSG00000168610	STAT3	signal transducer and activator of transcription 3
chr12	48118716	48119990	1275	1.64677	2.2887	0.608151	0.435487	Promoter (<=1kb)	12	48119264	48131383	12120	1	5213	ENST00000547066.5	0	ENSG00000152556	PFKM	phosphofructokinase, muscle
chr1	76294005	76295572	1568	1.6467	1.90831	0.665189	0.414736	Intron (ENST00000328299.4/256435, intron 1 of 4)	1	76313800	76413003	99204	1	256435	ENST00000621530.1	-18228	ENSG00000184005	ST6GALNAC3	ST6 N-acetylgalactosaminide alpha-2,6-sialyltransferase 3
chr3	141544395	141545455	1061	1.64667	1.81483	0.681181	0.409183	Intron (ENST00000286364.9/5922, intron 5 of 23)	3	141578524	141580445	1922	1	5922	ENST00000505833.1	-33069	ENSG00000155903	RASA2	RAS p21 protein activator 2
chr6	159168893	159170170	1278	1.64663	1.83972	0.676558	0.410777	Promoter (<=1kb)	6	159167248	159170007	2760	2	101929122	ENST00000608986.1	0	NA	FNDC1-AS1	FNDC1 antisense RNA 1
chr20	1776764	1778035	1272	1.64651	1.6402	0.713079	0.398426	Promoter (1-2kb)	20	1773365	1779746	6382	2	100289473	ENST00000458670.1	1711	ENSG00000232528	LOC100289473	cytoskeleton associated protein 2-like pseudogene
chr19	19537737	19538636	900	1.64647	2.16785	0.623699	0.429678	Promoter (<=1kb)	19	19538248	19546659	8412	1	148113	ENST00000586018.5	0	ENSG00000160161	CILP2	cartilage intermediate layer protein 2
chr12	93419326	93420433	1108	1.64638	1.82511	0.677582	0.410423	Intron (ENST00000318066.7/7334, intron 1 of 3)	12	93409742	93441256	31515	2	7334	ENST00000549833.1	20823	ENSG00000177889	UBE2N	ubiquitin conjugating enzyme E2 N
chr19	18940349	18941678	1330	1.64628	1.77089	0.686723	0.407284	Promoter (<=1kb)	19	18929201	18940352	11152	2	9454	ENST00000433218.6	0	ENSG00000051128	HOMER3	homer scaffold protein 3
chr17	17859982	17860640	659	1.64618	1.73599	0.692484	0.405323	Promoter (2-3kb)	17	17861903	17862780	878	2	146691	ENST00000468944.1	2140	ENSG00000175662	TOM1L2	target of myb1 like 2 membrane trafficking protein
chr19	12832499	12833233	735	1.64618	1.62943	0.712989	0.398456	Promoter (<=1kb)	19	12833951	12858864	24914	1	22983	ENST00000591495.5	-718	ENSG00000105613	MAST1	microtubule associated serine/threonine kinase 1
chr7	44476952	44477929	978	1.64612	1.42348	0.75874	0.383726	Intron (ENST00000355451.8/23386, intron 2 of 5)	7	44383591	44481462	97872	2	23386	ENST00000460110.5	3533	ENSG00000015676	NUDCD3	NudC domain containing 3
chr19	37210012	37211090	1079	1.64601	4.21786	0.459405	0.497904	Promoter (<=1kb)	19	37156331	37210512	54182	2	92285	ENST00000590245.5	0	ENSG00000245680	ZNF585B	zinc finger protein 585B
chr1	24586943	24587830	888	1.64594	1.69422	0.69885	0.403173	Promoter (1-2kb)	1	24589464	24609328	19865	1	400746	ENST00000486262.1	-1634	ENSG00000184454	NCMAP	non-compact myelin associated protein
chr8	66919316	66920059	744	1.64594	1.50667	0.737817	0.390364	Promoter (2-3kb)	8	66922467	66922555	89	2	641648	ENST00000364849.1	2496	ENSG00000254341	SNORD87	small nucleolar RNA, C/D box 87
chr17	76557001	76558689	1689	1.64592	5.13362	0.422068	0.515909	Promoter (<=1kb)	17	76557764	76564689	6926	1	100507246	ENST00000653677.1	0	ENSG00000163597	SNHG16	small nucleolar RNA host gene 16
chr10	102795893	102797171	1279	1.64581	1.43574	0.753452	0.385388	Intron (ENST00000448841.7/54838, intron 1 of 3)	10	102776249	102816267	40019	1	54838	ENST00000369889.5	19644	ENSG00000166272	WBP1L	WW domain binding protein 1 like
chr6	44002328	44003345	1018	1.64573	1.83155	0.672557	0.412164	Promoter (<=1kb)	6	43997182	44003649	6468	2	101929705	ENST00000607590.1	304	ENSG00000237686	SCIRT	stem cell inhibitory RNA transcript
chr19	3665320	3666450	1131	1.64566	1.49246	0.739075	0.38996	Promoter (<=1kb)	19	3661930	3667344	5415	2	23396	ENST00000636612.1	894	ENSG00000186111	PIP5K1C	phosphatidylinositol-4-phosphate 5-kinase type 1 gamma
chr1	148522075	148523738	1664	1.64548	4.95235	0.428528	0.512714	Promoter (2-3kb)	1	148432956	148519604	86649	2	388685	ENST00000639181.1	-2471	ENSG00000274020	LINC01138	long intergenic non-protein coding RNA 1138
chr1	39098253	39099057	805	1.64541	1.04756	0.867053	0.351775	Intron (ENST00000484793.5/23499, intron 3 of 3)	1	39105411	39323008	217598	1	23499	ENST00000524432.5	-6354	ENSG00000127603	MACF1	microtubule actin crosslinking factor 1
chr8	81090583	81091010	428	1.64532	1.37652	0.76442	0.381951	Intron (ENST00000220597.4/55824, intron 1 of 8)	8	81029791	81070176	40386	2	55824	ENST00000519326.1	-20407	ENSG00000076641	PAG1	phosphoprotein membrane anchor with glycosphingolipid microdomains 1
chr19	19444382	19445209	828	1.64523	1.40796	0.755942	0.384604	Intron (ENST00000494516.6/54815, intron 2 of 2)	19	19435063	19435158	96	1	693225	ENST00000385086.1	9319	ENSG00000207821	MIR640	microRNA 640
chr12	53756893	53758295	1403	1.64523	1.19632	0.814524	0.366789	Promoter (<=1kb)	12	53746346	53757227	10882	2	102216268	ENST00000669269.1	0	NA	CISTR	chondrogenesis-associated transcript
chr11	63869429	63869913	485	1.64513	1.502	0.733175	0.391859	Promoter (<=1kb)	11	63869276	63898793	29518	1	2011	ENST00000540169.5	153	ENSG00000072518	MARK2	microtubule affinity regulating kinase 2
chr13	26012157	26012944	788	1.64502	1.91044	0.655014	0.418328	Promoter (2-3kb)	13	26009971	26025102	15132	1	51761	ENST00000683868.1	2186	ENSG00000132932	ATP8A2	ATPase phospholipid transporting 8A2
chr9	137618248	137619046	799	1.64495	4.61427	0.441955	0.506182	Promoter (<=1kb)	9	137618992	137784393	165402	1	79813	ENST00000462484.5	0	ENSG00000181090	EHMT1	euchromatic histone lysine methyltransferase 1
chr3	15427106	15428615	1510	1.64486	3.80392	0.4775	0.489559	Promoter (<=1kb)	3	15381275	15427518	46244	2	131965	ENST00000443029.5	0	ENSG00000206562	METTL6	methyltransferase 6, methylcytidine
chr22	50018526	50019482	957	1.64479	1.2965	0.781416	0.376711	Intron (ENST00000266182.10/164714, intron 12 of 13)	22	49994513	50012659	18147	2	400935	ENST00000389983.6	-5867	ENSG00000188263	IL17REL	interleukin 17 receptor E like
chr10	12547099	12548251	1153	1.64479	1.24191	0.797116	0.37196	Intron (ENST00000619168.5/57118, intron 1 of 10)	10	12578753	12578823	71	1	100616151	ENST00000582492.1	-30502	ENSG00000263584	MIR4480	microRNA 4480
chr20	25148296	25149086	791	1.64467	1.55663	0.717981	0.39681	Promoter (<=1kb)	20	25139652	25148758	9107	2	284798	ENST00000667504.1	0	ENSG00000230725	LOC284798	uncharacterized LOC284798
chr22	19723458	19724327	870	1.64467	1.18642	0.812979	0.367244	Promoter (<=1kb)	22	19723539	19724771	1233	1	2812	ENST00000366425.4	0	ENSG00000203618	GP1BB	glycoprotein Ib platelet subunit beta
chr19	37172105	37173412	1308	1.6445	3.67753	0.483977	0.486628	Promoter (<=1kb)	19	37106734	37172726	65993	2	199704	ENST00000587817.5	0	ENSG00000196967	ZNF585A	zinc finger protein 585A
chr5	16935514	16936994	1481	1.64439	1.79037	0.671658	0.412477	Promoter (<=1kb)	5	16661907	16936288	274382	2	4651	ENST00000513610.6	0	ENSG00000145555	MYO10	myosin X
chr11	68471211	68472432	1222	1.64439	1.14957	0.822497	0.364454	Intron (ENST00000530427.5/55291, intron 1 of 4)	11	68460813	68615252	154440	1	55291	ENST00000529710.5	10398	ENSG00000110075	PPP6R3	protein phosphatase 6 regulatory subunit 3
chr15	92845040	92845588	549	1.64424	1.2429	0.792399	0.373378	Intron (ENST00000653163.1/100507217, intron 1 of 4)	15	92819540	92898743	79204	1	100507217	ENST00000653163.1	25500	NA	CHASERR	CHD2 adjacent suppressive regulatory RNA
chr6	15490798	15491988	1191	1.64424	1.08788	0.842193	0.358773	Intron (ENST00000341776.7/3720, intron 6 of 17)	6	15501358	15508393	7036	1	3720	ENST00000474854.1	-9370	ENSG00000008083	JARID2	jumonji and AT-rich interaction domain containing 2
chr20	41047522	41049202	1681	1.64423	3.47305	0.495997	0.481266	Intron (ENST00000361337.3/7150, intron 2 of 20)	20	41028914	41124473	95560	1	7150	ENST00000681113.1	18608	ENSG00000198900	TOP1	DNA topoisomerase I
chr7	157010222	157011384	1163	1.64408	1.15756	0.81727	0.365982	Promoter (<=1kb)	7	157004854	157010663	5810	2	3110	ENST00000252971.11	0	ENSG00000130675	MNX1	motor neuron and pancreas homeobox 1
chr16	86554110	86555702	1593	1.6439	3.48121	0.495137	0.481647	Promoter (<=1kb)	16	86555320	86557299	1980	1	146512	ENST00000624773.1	0	ENSG00000280278	FLJ30679	uncharacterized protein FLJ30679
chr1	156725929	156726744	816	1.64352	3.26827	0.508372	0.475846	Promoter (<=1kb)	1	156721891	156725867	3977	2	81875	ENST00000472824.2	-62	ENSG00000143319	ISG20L2	interferon stimulated exonuclease gene 20 like 2
chr11	65872898	65874129	1232	1.643	4.74184	0.435503	0.509303	Promoter (<=1kb)	11	65869857	65872942	3086	2	30008	ENST00000533347.5	0	ENSG00000172638	EFEMP2	EGF containing fibulin extracellular matrix protein 2
chr19	2782740	2783715	976	1.64271	4.66375	0.438641	0.507781	Promoter (<=1kb)	19	2754715	2783273	28559	2	6449	ENST00000221566.7	0	ENSG00000104969	SGTA	small glutamine rich tetratricopeptide repeat co-chaperone alpha
chr1	1574104	1575467	1364	1.64261	5.27391	0.415347	0.51927	Promoter (<=1kb)	1	1541673	1574863	33191	2	29101	ENST00000291386.4	0	ENSG00000160075	SSU72	SSU72 homolog, RNA polymerase II CTD phosphatase
chr1	160519254	160521157	1904	1.64174	3.54516	0.490534	0.483691	Promoter (2-3kb)	1	160486693	160523242	36550	2	114836	ENST00000368055.1	2085	ENSG00000162739	SLAMF6	SLAM family member 6
chr22	17628166	17629472	1307	1.6414	4.44678	0.44703	0.503751	Promoter (<=1kb)	22	17628855	17696209	67355	1	23786	ENST00000399781.5	0	ENSG00000099968	BCL2L13	BCL2 like 13
chr16	740508	741537	1030	1.64139	3.92261	0.469974	0.493001	Promoter (<=1kb)	16	729765	740997	11233	2	64428	ENST00000251588.7	0	ENSG00000103245	CIAO3	cytosolic iron-sulfur assembly component 3
chr7	1055023	1055992	970	1.64111	1.3755	0.734247	0.391512	Promoter (<=1kb)	7	1055279	1056552	1274	1	115330	ENST00000474396.1	0	ENSG00000164849	GPR146	G protein-coupled receptor 146
chr9	136399614	136400700	1087	1.64105	3.7422	0.478392	0.489153	Promoter (<=1kb)	9	136384786	136400168	15383	2	6621	ENST00000637388.1	0	ENSG00000165684	SNAPC4	small nuclear RNA activating complex polypeptide 4
chr20	43914480	43916312	1833	1.64102	3.05597	0.522766	0.469666	Promoter (<=1kb)	20	43914852	44069616	154765	1	84969	ENST00000341197.9	0	ENSG00000124191	TOX2	TOX high mobility group box family member 2
chr16	89484026	89485008	983	1.64102	2.80024	0.546787	0.459636	Intron (ENST00000378330.7/29123, intron 1 of 13)	16	89291728	89489193	197466	2	29123	ENST00000562816.5	4185	ENSG00000167522	ANKRD11	ankyrin repeat domain 11
chr17	58692184	58693253	1070	1.64055	3.79431	0.476015	0.490235	Promoter (<=1kb)	17	58692573	58709911	17339	1	5889	ENST00000461271.5	0	ENSG00000108384	RAD51C	RAD51 paralog C
chr14	21068561	21071725	3165	1.64033	4.19522	0.457285	0.498898	Promoter (<=1kb)	14	21070273	21075553	5281	1	55701	ENST00000555038.5	0	ENSG00000165801	ARHGEF40	Rho guanine nucleotide exchange factor 40
chr12	120439631	120440102	472	1.64013	2.82997	0.542749	0.461298	Promoter (1-2kb)	12	120438198	120460006	21809	1	283459	ENST00000551806.1	1433	ENSG00000257218	GATC	glutamyl-tRNA amidotransferase subunit C
chr8	106269487	106271519	2033	1.63988	4.41345	0.44679	0.503865	Promoter (<=1kb)	8	106270144	106272899	2756	1	55074	ENST00000521369.2	0	ENSG00000164830	OXR1	oxidation resistance 1
chr4	2934031	2936342	2312	1.63987	5.35385	0.411091	0.521418	Promoter (<=1kb)	4	2930567	2934825	4259	2	10227	ENST00000355443.9	0	ENSG00000109736	MFSD10	major facilitator superfamily domain containing 10
chr14	61336939	61338423	1485	1.63985	4.15798	0.458643	0.498261	Intron (ENST00000555185.5/5583, intron 1 of 3)	14	61344242	61450872	106631	1	5583	ENST00000553831.5	-5819	ENSG00000027075	PRKCH	protein kinase C eta
chr6	35310447	35312261	1815	1.63955	2.54041	0.57355	0.448854	Promoter (<=1kb)	6	35309738	35312538	2801	1	50619	ENST00000444278.2	709	ENSG00000023892	DEF6	DEF6 guanine nucleotide exchange factor
chr17	75666792	75667793	1002	1.63955	4.17926	0.457472	0.49881	Promoter (<=1kb)	17	75667251	75690716	23466	1	29115	ENST00000583170.5	0	ENSG00000161526	SAP30BP	SAP30 binding protein
chr15	92849096	92850452	1357	1.63945	2.71517	0.553493	0.456896	Intron (ENST00000653163.1/100507217, intron 1 of 4)	15	92819540	92898743	79204	1	100507217	ENST00000653163.1	29556	NA	CHASERR	CHD2 adjacent suppressive regulatory RNA
chr22	19171016	19172232	1217	1.6394	3.97799	0.466561	0.494576	Promoter (<=1kb)	22	19171395	19172839	1445	1	100652736	ENST00000565162.2	0	NA	LINC01311	long intergenic non-protein coding RNA 1311
chr6	11727982	11729456	1475	1.63934	2.64251	0.56127	0.453751	Promoter (<=1kb)	6	11713954	11728557	14604	2	84830	ENST00000513651.5	0	ENSG00000111863	ADTRP	androgen dependent TFPI regulating protein
chr19	38513845	38515811	1967	1.63934	2.25702	0.609925	0.434818	Promoter (2-3kb)	19	38511571	38535174	23604	1	6261	ENST00000599547.5	2274	ENSG00000196218	RYR1	ryanodine receptor 1
chr1	111225576	111226362	787	1.63901	2.9552	0.529507	0.466816	Promoter (<=1kb)	1	111227016	111236080	9065	1	1117	ENST00000528451.5	-654	ENSG00000064886	CHI3L2	chitinase 3 like 2
chr16	14308832	14309731	900	1.63889	1.25751	0.747949	0.387129	Promoter (<=1kb)	16	14309285	14309371	87	1	100126355	ENST00000362260.3	0	ENSG00000199130	MIR365A	microRNA 365a
chr7	75442250	75442883	634	1.63878	1.77068	0.686264	0.407441	Promoter (<=1kb)	7	75418796	75442719	23924	2	100101267	ENST00000607367.5	0	ENSG00000272391	POM121C	POM121 transmembrane nucleoporin C
chr18	35049536	35050966	1431	1.63866	2.2522	0.609605	0.434939	Intron (ENST00000591734.5/10982, intron 2 of 5)	18	35041650	35143470	101821	1	10982	ENST00000589699.1	7886	ENSG00000166974	MAPRE2	microtubule associated protein RP/EB family member 2
chr6	28355501	28356614	1114	1.63866	2.24967	0.609957	0.434806	Promoter (<=1kb)	6	28324740	28356271	31532	2	64288	ENST00000414429.5	0	ENSG00000235109	ZSCAN31	zinc finger and SCAN domain containing 31
chr7	50092587	50093474	888	1.63853	2.5501	0.571045	0.449846	Promoter (<=1kb)	7	49937441	50093246	155806	2	11055	ENST00000046087.7	0	ENSG00000042813	ZPBP	zona pellucida binding protein
chr18	63213059	63213855	797	1.63814	1.86807	0.667886	0.413792	Intron (ENST00000678134.1/596, intron 2 of 2)	18	63128212	63161869	33658	2	596	ENST00000590515.1	-51190	ENSG00000171791	BCL2	BCL2 apoptosis regulator
chr12	32399003	32400154	1152	1.63786	2.29026	0.603236	0.437348	Promoter (<=1kb)	12	32399558	32646050	246493	1	121512	ENST00000534526.7	0	ENSG00000139132	FGD4	FYVE, RhoGEF and PH domain containing 4
chr5	88881885	88884337	2453	1.63772	2.21003	0.61422	0.433206	Promoter (<=1kb)	5	88883328	89032293	148966	1	101929423	ENST00000511100.5	0	ENSG00000248309	MEF2C-AS1	MEF2C antisense RNA 1
chr1	46340043	46341644	1602	1.63745	5.16394	0.416818	0.518531	Promoter (<=1kb)	1	46340789	46365152	24364	1	387338	ENST00000307089.7	0	ENSG00000117481	NSUN4	NOP2/Sun RNA methyltransferase 4
chr22	29414620	29415664	1045	1.63718	2.91295	0.534312	0.464802	Intron (ENST00000650462.1/5988, intron 6 of 6)	22	29406803	29410767	3965	1	5988	ENST00000649455.1	7817	ENSG00000128250	RFPL1	ret finger protein like 1
chr1	31548639	31549713	1075	1.63694	2.37012	0.59132	0.441911	Intron (ENST00000639839.1/149086, intron 4 of 4)	1	31571585	31575573	3989	2	105378626	ENST00000435872.1	25860	NA	LOC105378626	uncharacterized LOC105378626
chr3	52317190	52318163	974	1.63694	2.33378	0.596077	0.440081	Promoter (<=1kb)	3	52317871	52353821	35951	1	25981	ENST00000497875.1	0	ENSG00000114841	DNAH1	dynein axonemal heavy chain 1
chr1	13699802	13701436	1635	1.63686	4.38213	0.44763	0.503465	Promoter (<=1kb)	1	13700198	13749463	49266	1	7799	ENST00000484063.6	0	ENSG00000116731	PRDM2	PR/SET domain 2
chr3	32398598	32399480	883	1.63677	2.29299	0.601316	0.438079	Intron (ENST00000349718.8/112616, intron 1 of 3)	3	32392039	32454819	62781	1	112616	ENST00000465248.1	6559	ENSG00000153551	CMTM7	CKLF like MARVEL transmembrane domain containing 7
chr11	122882710	122883828	1119	1.63663	2.88092	0.536846	0.463745	Promoter (<=1kb)	11	122882759	122963862	81104	1	79864	ENST00000227349.7	0	ENSG00000109944	JHY	junctional cadherin complex regulator
chr6	16473338	16475238	1901	1.63659	1.78412	0.680118	0.409549	Intron (ENST00000244769.8/6310, intron 7 of 8)	6	16289945	16295121	5177	1	2766	ENST00000540478.1	183393	ENSG00000137198	GMPR	guanosine monophosphate reductase
chr19	53333162	53334278	1117	1.63628	4.38225	0.447084	0.503725	Promoter (<=1kb)	19	53333749	53354869	21121	1	91664	ENST00000595091.6	0	ENSG00000213799	ZNF845	zinc finger protein 845
chr11	2444045	2445701	1657	1.63617	3.95677	0.465252	0.495182	Promoter (<=1kb)	11	2444684	2572906	128223	1	3784	ENST00000496887.6	0	ENSG00000053918	KCNQ1	potassium voltage-gated channel subfamily Q member 1
chr4	89290600	89291247	648	1.63564	1.8368	0.669192	0.413336	Intron (ENST00000609438.2/285513, intron 1 of 1)	4	89236383	89307800	71418	2	285513	ENST00000609438.2	16553	ENSG00000185477	GPRIN3	GPRIN family member 3
chr21	45477864	45479291	1428	1.63559	3.19659	0.507835	0.47608	Promoter (<=1kb)	21	45478266	45478326	61	1	102465489	ENST00000611994.1	0	ENSG00000275167	MIR6815	microRNA 6815
chr19	1173270	1175075	1806	1.63525	3.28617	0.502494	0.478409	Promoter (<=1kb)	19	1107638	1174268	66631	2	22904	ENST00000361757.8	0	ENSG00000064932	SBNO2	strawberry notch homolog 2
chr17	81285106	81286112	1007	1.63522	1.75087	0.68384	0.40827	Promoter (<=1kb)	17	81246615	81285714	39100	2	124565	ENST00000542075.5	0	ENSG00000157637	SLC38A10	solute carrier family 38 member 10
chr19	55178952	55180292	1341	1.63508	4.59547	0.437672	0.50825	Promoter (<=1kb)	19	55171196	55180289	9094	2	6861	ENST00000354308.8	0	ENSG00000129990	SYT5	synaptotagmin 5
chr19	18450665	18451698	1034	1.63476	1.91696	0.654184	0.418623	Promoter (<=1kb)	19	18446146	18450526	4381	2	8178	ENST00000608165.1	-139	ENSG00000105656	ELL	elongation factor for RNA polymerase II
chr17	82716095	82717314	1220	1.63446	4.88616	0.425437	0.514238	Promoter (<=1kb)	17	82713908	82716255	2348	2	101929552	ENST00000574471.1	0	ENSG00000263063	LOC101929552	uncharacterized LOC101929552
chr19	44164533	44165759	1227	1.63436	3.7079	0.477071	0.489754	Promoter (<=1kb)	19	44165073	44175643	10571	1	7769	ENST00000590578.5	0	ENSG00000167380	ZNF226	zinc finger protein 226
chr19	12162601	12163814	1214	1.63413	4.49362	0.441274	0.50651	Promoter (<=1kb)	19	12163064	12186602	23539	1	7695	ENST00000425827.5	0	ENSG00000196646	ZNF136	zinc finger protein 136
chr9	35910717	35911795	1079	1.63403	1.60803	0.709098	0.399746	Promoter (1-2kb)	9	35909492	35937153	27662	1	158376	ENST00000638062.1	1225	ENSG00000235387	SPAAR	small regulatory polypeptide of amino acid response
chr1	159944998	159946243	1246	1.63377	2.38815	0.584659	0.444494	Promoter (<=1kb)	1	159927039	159945593	18555	2	57549	ENST00000476102.1	0	ENSG00000085552	IGSF9	immunoglobulin superfamily member 9
chr19	35947074	35948182	1109	1.63377	1.96667	0.64456	0.422067	Promoter (<=1kb)	19	35947115	35959192	12078	1	105372383	ENST00000592518.1	0	NA	LOC105372383	uncharacterized LOC105372383
chr12	121551783	121553043	1261	1.63377	1.49308	0.733707	0.391687	Promoter (2-3kb)	12	121429509	121549639	120131	2	84678	ENST00000538503.5	-2144	ENSG00000089094	KDM2B	lysine demethylase 2B
chr10	62368339	62369605	1267	1.63377	1.49037	0.734324	0.391488	Intron (ENST00000669855.1/283045, intron 1 of 3)	10	62374192	62480288	106097	1	22891	ENST00000395255.7	-4587	ENSG00000138311	ZNF365	zinc finger protein 365
chr11	65083700	65084837	1138	1.63362	4.39931	0.444965	0.504738	Promoter (<=1kb)	11	65068044	65083900	15857	2	113130	ENST00000533015.5	0	ENSG00000146670	CDCA5	cell division cycle associated 5
chr22	31107139	31108324	1186	1.63325	4.24255	0.451497	0.501627	Promoter (<=1kb)	22	31104777	31107533	2757	2	140606	ENST00000490967.5	0	ENSG00000198832	SELENOM	selenoprotein M
chr3	16318844	16319831	988	1.63321	2.25122	0.601966	0.437831	Intron (ENST00000605932.5/92106, intron 9 of 9)	3	16313574	16326867	13294	2	23180	ENST00000607320.5	7036	ENSG00000131378	RFTN1	raftlin, lipid raft linker 1
chr12	50923972	50925482	1511	1.6332	2.84441	0.537121	0.46363	Promoter (<=1kb)	12	50924005	50929955	5951	1	25840	ENST00000550502.1	0	ENSG00000185432	METTL7A	methyltransferase like 7A
chr19	14367919	14368600	682	1.63319	3.6483	0.479332	0.488727	Promoter (1-2kb)	19	14325352	14370196	44845	2	105372288	ENST00000588438.1	1596	ENSG00000266913	LINC01841	long intergenic non-protein coding RNA 1841
chr9	89428879	89429698	820	1.63292	2.08979	0.624548	0.429364	Intron (ENST00000339861.8/10507, intron 1 of 18)	9	89402945	89436463	33519	2	10507	ENST00000418828.1	6765	ENSG00000187764	SEMA4D	semaphorin 4D
chr16	8621253	8622453	1201	1.63287	3.0715	0.517506	0.47191	Promoter (<=1kb)	16	8621683	8628808	7126	1	79091	ENST00000563958.5	0	ENSG00000067365	METTL22	methyltransferase 22, Kin17 lysine
chr19	18611342	18613066	1725	1.63262	2.25645	0.600409	0.438424	Promoter (<=1kb)	19	18612870	18621039	8170	1	25789	ENST00000262817.8	0	ENSG00000105696	TMEM59L	transmembrane protein 59 like
chr15	56365003	56366091	1089	1.63262	1.63811	0.700671	0.402561	Promoter (<=1kb)	15	56365427	56445874	80448	1	374618	ENST00000352903.6	0	ENSG00000151575	TEX9	testis expressed 9
chr1	6364912	6365729	818	1.63262	1.60345	0.707486	0.400282	Intron (ENST00000608083.5/11332, intron 1 of 8)	1	6264273	6360707	96435	2	11332	ENST00000377845.7	-4205	ENSG00000097021	ACOT7	acyl-CoA thioesterase 7
chr12	57127352	57128797	1446	1.6326	3.86778	0.46749	0.494146	Promoter (<=1kb)	12	57128483	57213361	84879	1	4035	ENST00000243077.8	0	ENSG00000123384	LRP1	LDL receptor related protein 1
chr1	110083555	110085031	1477	1.6323	1.98131	0.639959	0.423728	Promoter (<=1kb)	1	110082688	110109719	27032	1	104355139	ENST00000554808.1	867	ENSG00000258673	LINC01397	long intergenic non-protein coding RNA 1397
chr1	149916526	149918432	1907	1.6323	1.81336	0.667774	0.413831	Promoter (<=1kb)	1	149903318	149917844	14527	2	9900	ENST00000369146.8	0	ENSG00000159164	SV2A	synaptic vesicle glycoprotein 2A
chr6	43454427	43456139	1713	1.63221	3.88906	0.466649	0.494535	Promoter (<=1kb)	6	43450352	43455548	5197	2	65989	ENST00000372488.8	0	ENSG00000171462	DLK2	delta like non-canonical Notch ligand 2
chr4	99055534	99056789	1256	1.63197	1.44467	0.741565	0.389163	Intron (ENST00000296411.11/23173, intron 9 of 10)	4	99045190	99062024	16835	1	23173	ENST00000514051.1	10344	ENSG00000164024	METAP1	methionyl aminopeptidase 1
chr1	192552550	192553308	759	1.63197	1.25894	0.790055	0.374086	Intron (ENST00000642855.1/105371664, intron 4 of 7)	1	192575763	192577276	1514	1	5996	ENST00000474373.1	-22455	ENSG00000090104	RGS1	regulator of G protein signaling 1
chr20	1324741	1326054	1314	1.63181	5.39487	0.405802	0.52411	Promoter (<=1kb)	20	1325405	1345898	20494	1	100507495	ENST00000609745.1	0	ENSG00000234684	SDCBP2-AS1	SDCBP2 antisense RNA 1
chr3	128486974	128487832	859	1.63163	1.7941	0.670064	0.413032	Promoter (<=1kb)	3	128480146	128487916	7771	2	2624	ENST00000430265.6	84	ENSG00000179348	GATA2	GATA binding protein 2
[truncated: 408 more rows]

## Sheet: FILTERED_LIST
A1BG
[truncated: 1,696 more rows]

## Sheet: TIDB
ACE
[truncated: 1,721 more rows]

## Sheet: ConsensusPathDB (Reactome)
p-value	q-value	pathway	source	external_id	members_input_overlap	members_input_overlap_geneids	size	effective_size
[truncated: 87 more rows]

[truncated: 1 more sheets: GO_BP (David)]
